# Supplementary material for: Novel polyvinyl alcohol-assisted MnO2–ZnO–CuO nanocomposites as an efficient photocatalyst for methylene blue degradation from wastewater
Source: Royal Society of Chemistry journal article supplement (doi:10.1039/d4ra06476c), 2024-01-01
Supplement: d4ra06476c1.pdf [file d4ra06476c1.pdf]

| Temp  | Fig 1    |        |         | Fig2  |       |         | Fig 11 c         |           |             | Fig 11b  |           |          |          |
|-------|----------|--------|---------|-------|-------|---------|------------------|-----------|-------------|----------|-----------|----------|----------|
|       | TGA loss | DTA Uv | 2Thet Z | M Int | C Int | MZC Int | Before 2Thet Int | After Int | Before cm-1 | After %T | Before %T | After %T |          |
| 45.29 | -2.58    | -0.01  | 10      | 38    | 40    | 260     | 98               | 10        | 98          | 97.512   |           |          |          |
| 45.53 | -2.59    | -0.01  | 10      | 32    | 42    | 234     | 90               | 10        | 90          | 89.552   | 407       | 22.294   | 22.90817 |
| 45.95 | -2.6     | -0.01  | 10      | 30    | 32    | 230     | 100              | 10        | 100         | 99.502   | 409       | 22.406   | 22.51758 |
| 46.08 | -2.6     | -0.01  | 10.1    | 32    | 42    | 240     | 70               | 10.1      | 70          | 69.652   | 411       | 20.532   | 20.63431 |
| 46.33 | -2.61    | -0.01  | 10.1    | 38    | 48    | 244     | 98               | 10.1      | 98          | 97.512   | 413       | 18.215   | 18.30567 |
| 46.6  | -2.61    | -0.01  | 10.1    | 38    | 56    | 268     | 96               | 10.1      | 96          | 95.522   | 415       | 16.73    | 16.81381 |
| 46.77 | -2.62    | -0.01  | 10.1    | 36    | 40    | 282     | 80               | 10.1      | 80          | 79.602   | 417       | 16.896   | 16.98008 |
| 47.21 | -2.62    | -0.01  | 10.1    | 48    | 28    | 276     | 88               | 10.1      | 88          | 87.562   | 418       | 18.424   | 18.51658 |
| 47.35 | -2.62    | -0.01  | 10.2    | 52    | 54    | 238     | 98               | 10.2      | 98          | 97.512   | 420       | 20.196   | 20.29651 |
| 47.56 | -2.62    | -0.01  | 10.2    | 34    | 48    | 236     | 114              | 10.2      | 114         | 113.43   | 422       | 21.196   | 21.30222 |
| 47.88 | -2.62    | -0.01  | 10.2    | 50    | 38    | 270     | 74               | 10.2      | 74          | 73.632   | 424       | 21.104   | 21.20945 |
| 48.16 | -2.62    | -0.01  | 10.2    | 40    | 38    | 278     | 98               | 10.2      | 98          | 97.512   | 426       | 20.257   | 20.35847 |
| 48.67 | -2.62    | -0.01  | 10.2    | 42    | 44    | 258     | 88               | 10.2      | 88          | 87.562   | 428       | 19.352   | 19.44841 |
| 48.88 | -2.61    | -0.01  | 10.3    | 58    | 40    | 238     | 100              | 10.3      | 100         | 99.502   | 430       | 19.08    | 19.17507 |
| 49.15 | -2.61    | -0.01  | 10.3    | 46    | 40    | 278     | 80               | 10.3      | 80          | 79.602   | 432       | 19.79    | 19.88942 |
| 49.51 | -2.61    | -0.01  | 10.3    | 42    | 48    | 248     | 86               | 10.3      | 86          | 85.572   | 434       | 21.33    | 21.43693 |
| 49.63 | -2.6     | -0.01  | 10.3    | 32    | 34    | 270     | 94               | 10.3      | 94          | 93.532   | 436       | 23.205   | 23.32071 |
| 49.92 | -2.6     | -0.01  | 10.3    | 34    | 44    | 258     | 104              | 10.3      | 104         | 103.48   | 438       | 24.88    | 25.00452 |
| 50.15 | -2.59    | -0.01  | 10.4    | 40    | 38    | 262     | 92               | 10.4      | 92          | 91.542   | 440       | 26.058   | 26.18796 |
| 50.36 | -2.58    | -0.01  | 10.4    | 38    | 44    | 274     | 88               | 10.4      | 88          | 87.562   | 442       | 26.762   | 26.89548 |
| 50.74 | -2.58    | -0.01  | 10.4    | 36    | 38    | 284     | 82               | 10.4      | 82          | 81.592   | 444       | 27.257   | 27.39324 |
| 50.86 | -2.57    | -0.01  | 10.4    | 42    | 48    | 254     | 88               | 10.4      | 88          | 87.562   | 445       | 27.869   | 28.00846 |
| 51.14 | -2.56    | -0.02  | 10.4    | 36    | 34    | 242     | 86               | 10.4      | 86          | 85.572   | 447       | 28.791   | 28.93445 |
| 51.4  | -2.55    | -0.02  | 10.5    | 48    | 44    | 258     | 112              | 10.5      | 112         | 111.44   | 449       | 29.981   | 30.13059 |
| 51.73 | -2.54    | -0.02  | 10.5    | 32    | 44    | 260     | 76               | 10.5      | 76          | 75.622   | 451       | 31.212   | 31.36847 |
| 52.21 | -2.53    | -0.02  | 10.5    | 42    | 36    | 254     | 86               | 10.5      | 86          | 85.572   | 453       | 32.223   | 32.38393 |
| 52.4  | -2.52    | -0.02  | 10.5    | 36    | 44    | 266     | 86               | 10.5      | 86          | 85.572   | 455       | 32.862   | 33.02589 |
| 52.69 | -2.5     | -0.02  | 10.5    | 50    | 48    | 270     | 92               | 10.5      | 92          | 91.542   | 457       | 33.162   | 33.32824 |
| 53    | -2.49    | -0.02  | 10.6    | 36    | 50    | 248     | 82               | 10.6      | 82          | 81.592   | 459       | 33.316   | 33.48257 |
| 53.09 | -2.48    | -0.02  | 10.6    | 38    | 46    | 294     | 78               | 10.6      | 78          | 77.612   | 461       | 33.562   | 33.7295  |
| 53.47 | -2.46    | -0.02  | 10.6    | 56    | 42    | 278     | 92               | 10.6      | 92          | 91.542   | 463       | 34.052   | 34.22179 |
| 53.62 | -2.45    | -0.02  | 10.6    | 40    | 40    | 272     | 88               | 10.6      | 88          | 87.562   | 465       | 34.763   | 34.93689 |
| 53.87 | -2.43    | -0.02  | 10.6    | 36    | 46    | 274     | 92               | 10.6      | 92          | 91.542   | 467       | 35.552   | 35.73009 |
| 54.21 | -2.42    | -0.02  | 10.7    | 32    | 44    | 268     | 76               | 10.7      | 76          | 75.622   | 469       | 36.231   | 36.41172 |
| 54.33 | -2.4     | -0.02  | 10.7    | 24    | 36    | 268     | 100              | 10.7      | 100         | 99.502   | 471       | 36.686   | 36.86953 |
| 54.65 | -2.39    | -0.02  | 10.7    | 32    | 42    | 276     | 86               | 10.7      | 86          | 85.572   | 472       | 36.94    | 37.12423 |
| 54.92 | -2.37    | -0.02  | 10.7    | 36    | 36    | 278     | 84               | 10.7      | 84          | 83.582   | 474       | 37.125   | 37.31038 |
| 55.25 | -2.35    | -0.02  | 10.7    | 30    | 50    | 274     | 88               | 10.7      | 88          | 87.562   | 476       | 37.41    | 37.59719 |
| 55.71 | -2.33    | -0.03  | 10.8    | 38    | 44    | 268     | 84               | 10.8      | 84          | 83.582   | 478       | 37.899   | 38.08867 |
| 55.85 | -2.32    | -0.03  | 10.8    | 42    | 40    | 280     | 88               | 10.8      | 88          | 87.562   | 480       | 38.574   | 38.7671  |
| 56.2  | -2.3     | -0.03  | 10.8    | 38    | 44    | 276     | 84               | 10.8      | 84          | 83.582   | 482       | 39.318   | 39.51485 |
| 56.44 | -2.28    | -0.03  | 10.8    | 44    | 52    | 240     | 84               | 10.8      | 84          | 83.582   | 484       | 39.993   | 40.19295 |
| 56.54 | -2.26    | -0.03  | 10.8    | 36    | 48    | 290     | 82               | 10.8      | 82          | 81.592   | 486       | 40.52    | 40.7221  |
| 56.92 | -2.24    | -0.03  | 10.9    | 46    | 38    | 280     | 88               | 10.9      | 88          | 87.562   | 488       | 40.918   | 41.12254 |

|       |       |       |      |    |    |     |     |      |     |        |     |        |          |
|-------|-------|-------|------|----|----|-----|-----|------|-----|--------|-----|--------|----------|
| 57.06 | -2.22 | -0.03 | 10.9 | 42 | 38 | 254 | 94  | 10.9 | 94  | 93.532 | 490 | 41.294 | 41.50028 |
| 57.3  | -2.19 | -0.03 | 10.9 | 36 | 60 | 238 | 76  | 10.9 | 76  | 75.622 | 492 | 41.781 | 41.99018 |
| 57.58 | -2.17 | -0.03 | 10.9 | 34 | 48 | 282 | 106 | 10.9 | 106 | 105.47 | 494 | 42.473 | 42.68521 |
| 57.71 | -2.15 | -0.03 | 10.9 | 26 | 42 | 268 | 96  | 10.9 | 96  | 95.522 | 496 | 43.367 | 43.58411 |
| 58.07 | -2.13 | -0.03 | 11   | 24 | 40 | 276 | 88  | 11   | 88  | 87.562 | 498 | 44.394 | 44.61605 |
| 58.29 | -2.11 | -0.04 | 11   | 38 | 42 | 280 | 94  | 11   | 94  | 93.532 | 499 | 45.444 | 45.6715  |
| 58.66 | -2.09 | -0.04 | 11   | 34 | 36 | 258 | 88  | 11   | 88  | 87.562 | 501 | 46.435 | 46.66741 |
| 59.03 | -2.06 | -0.04 | 11   | 34 | 48 | 278 | 88  | 11   | 88  | 87.562 | 503 | 47.346 | 47.58311 |
| 59.17 | -2.04 | -0.04 | 11   | 26 | 28 | 242 | 100 | 11   | 100 | 99.502 | 505 | 48.216 | 48.45672 |
| 59.56 | -2.02 | -0.04 | 11.1 | 30 | 32 | 250 | 90  | 11.1 | 90  | 89.552 | 507 | 49.105 | 49.35039 |
| 59.75 | -2    | -0.04 | 11.1 | 32 | 44 | 268 | 84  | 11.1 | 84  | 83.582 | 509 | 50.054 | 50.30431 |
| 59.88 | -1.97 | -0.04 | 11.1 | 36 | 30 | 304 | 90  | 11.1 | 90  | 89.552 | 511 | 51.054 | 51.30902 |
| 60.23 | -1.95 | -0.04 | 11.1 | 44 | 46 | 280 | 80  | 11.1 | 80  | 79.602 | 513 | 52.051 | 52.3113  |
| 60.35 | -1.92 | -0.04 | 11.1 | 32 | 42 | 280 | 92  | 11.1 | 92  | 91.542 | 515 | 52.983 | 53.24795 |
| 60.64 | -1.9  | -0.05 | 11.2 | 34 | 42 | 294 | 88  | 11.2 | 88  | 87.562 | 517 | 53.813 | 54.08166 |
| 60.9  | -1.88 | -0.05 | 11.2 | 44 | 46 | 256 | 82  | 11.2 | 82  | 81.592 | 519 | 54.548 | 54.82043 |
| 61.01 | -1.85 | -0.05 | 11.2 | 32 | 46 | 250 | 76  | 11.2 | 76  | 75.622 | 521 | 55.234 | 55.51029 |
| 61.36 | -1.83 | -0.05 | 11.2 | 26 | 30 | 274 | 96  | 11.2 | 96  | 95.522 | 523 | 55.927 | 56.20662 |
| 61.61 | -1.8  | -0.05 | 11.2 | 30 | 50 | 266 | 80  | 11.2 | 80  | 79.602 | 525 | 56.657 | 56.94069 |
| 61.99 | -1.78 | -0.05 | 11.3 | 42 | 46 | 282 | 78  | 11.3 | 78  | 77.612 | 526 | 57.414 | 57.70094 |
| 62.29 | -1.75 | -0.05 | 11.3 | 30 | 34 | 274 | 80  | 11.3 | 80  | 79.602 | 528 | 58.16  | 58.45093 |
| 62.45 | -1.73 | -0.05 | 11.3 | 34 | 32 | 284 | 104 | 11.3 | 104 | 103.48 | 530 | 58.855 | 59.14944 |
| 62.87 | -1.7  | -0.05 | 11.3 | 42 | 36 | 284 | 80  | 11.3 | 80  | 79.602 | 532 | 59.483 | 59.78085 |
| 62.98 | -1.68 | -0.05 | 11.3 | 28 | 54 | 292 | 96  | 11.3 | 96  | 95.522 | 534 | 60.067 | 60.3672  |
| 63.12 | -1.65 | -0.05 | 11.4 | 32 | 32 | 250 | 84  | 11.4 | 84  | 83.582 | 536 | 60.657 | 60.9603  |
| 63.46 | -1.63 | -0.06 | 11.4 | 36 | 34 | 296 | 94  | 11.4 | 94  | 93.532 | 538 | 61.314 | 61.62037 |
| 63.55 | -1.6  | -0.06 | 11.4 | 20 | 54 | 284 | 104 | 11.4 | 104 | 103.48 | 540 | 62.08  | 62.38996 |
| 63.91 | -1.58 | -0.06 | 11.4 | 34 | 42 | 280 | 80  | 11.4 | 80  | 79.602 | 542 | 62.963 | 63.27811 |
| 64.07 | -1.55 | -0.06 | 11.4 | 36 | 44 | 298 | 92  | 11.4 | 92  | 91.542 | 544 | 63.942 | 64.26219 |
| 64.23 | -1.52 | -0.06 | 11.5 | 28 | 40 | 282 | 104 | 11.5 | 104 | 103.48 | 546 | 64.981 | 65.30565 |
| 64.56 | -1.5  | -0.06 | 11.5 | 30 | 46 | 262 | 100 | 11.5 | 100 | 99.502 | 548 | 66.049 | 66.37957 |
| 64.82 | -1.47 | -0.06 | 11.5 | 28 | 46 | 296 | 80  | 11.5 | 80  | 79.602 | 550 | 67.139 | 67.47498 |
| 65.23 | -1.45 | -0.06 | 11.5 | 42 | 42 | 280 | 94  | 11.5 | 94  | 93.532 | 552 | 68.259 | 68.60056 |
| 65.46 | -1.42 | -0.06 | 11.5 | 30 | 44 | 266 | 86  | 11.5 | 86  | 85.572 | 553 | 69.422 | 69.7695  |
| 65.63 | -1.4  | -0.06 | 11.6 | 46 | 34 | 268 | 76  | 11.6 | 76  | 75.622 | 555 | 70.632 | 70.98522 |
| 66.02 | -1.37 | -0.06 | 11.6 | 26 | 52 | 304 | 86  | 11.6 | 86  | 85.572 | 557 | 71.875 | 72.23388 |
| 66.11 | -1.34 | -0.07 | 11.6 | 30 | 36 | 280 | 88  | 11.6 | 88  | 87.562 | 559 | 73.128 | 73.49333 |
| 66.35 | -1.32 | -0.07 | 11.6 | 38 | 42 | 270 | 102 | 11.6 | 102 | 101.49 | 561 | 74.368 | 74.73997 |
| 66.6  | -1.29 | -0.07 | 11.6 | 38 | 38 | 288 | 90  | 11.6 | 90  | 89.552 | 563 | 75.582 | 75.95967 |
| 66.72 | -1.27 | -0.07 | 11.7 | 22 | 50 | 304 | 92  | 11.7 | 92  | 91.542 | 565 | 76.766 | 77.15007 |
| 67.13 | -1.24 | -0.07 | 11.7 | 32 | 46 | 312 | 78  | 11.7 | 78  | 77.612 | 567 | 77.926 | 78.31514 |
| 67.23 | -1.22 | -0.07 | 11.7 | 34 | 54 | 300 | 72  | 11.7 | 72  | 71.642 | 569 | 79.06  | 79.45579 |
| 67.4  | -1.19 | -0.07 | 11.7 | 36 | 44 | 278 | 94  | 11.7 | 94  | 93.532 | 571 | 80.161 | 80.56219 |
| 67.73 | -1.17 | -0.07 | 11.7 | 40 | 62 | 254 | 76  | 11.7 | 76  | 75.622 | 573 | 81.207 | 81.61311 |
| 67.97 | -1.14 | -0.07 | 11.8 | 34 | 60 | 272 | 88  | 11.8 | 88  | 87.562 | 575 | 82.17  | 82.58127 |
| 68.4  | -1.12 | -0.07 | 11.8 | 28 | 30 | 266 | 78  | 11.8 | 78  | 77.612 | 577 | 83.027 | 83.44214 |
| 68.61 | -1.09 | -0.07 | 11.8 | 32 | 48 | 338 | 70  | 11.8 | 70  | 69.652 | 579 | 83.761 | 84.17988 |

|       |       |       |      |    |     |     |     |      |     |        |     |        |          |
|-------|-------|-------|------|----|-----|-----|-----|------|-----|--------|-----|--------|----------|
| 68.83 | -1.07 | -0.07 | 11.8 | 28 | 46  | 280 | 90  | 11.8 | 90  | 89.552 | 580 | 84.367 | 84.78911 |
| 69.15 | -1.04 | -0.07 | 11.8 | 30 | 60  | 316 | 84  | 11.8 | 84  | 83.582 | 582 | 84.848 | 85.27235 |
| 69.22 | -1.01 | -0.07 | 11.9 | 26 | 56  | 266 | 74  | 11.9 | 74  | 73.632 | 584 | 85.21  | 85.63618 |
| 69.51 | -0.99 | -0.07 | 11.9 | 20 | 48  | 286 | 108 | 11.9 | 108 | 107.46 | 586 | 85.461 | 85.88835 |
| 69.73 | -0.96 | -0.07 | 11.9 | 32 | 54  | 296 | 100 | 11.9 | 100 | 99.502 | 588 | 85.609 | 86.03714 |
| 69.87 | -0.94 | -0.07 | 11.9 | 34 | 52  | 286 | 102 | 11.9 | 102 | 101.49 | 590 | 85.665 | 86.09377 |
| 70.24 | -0.91 | -0.08 | 11.9 | 34 | 58  | 298 | 80  | 11.9 | 80  | 79.602 | 592 | 85.647 | 86.07481 |
| 70.32 | -0.89 | -0.08 | 12   | 26 | 60  | 310 | 80  | 12   | 80  | 79.602 | 594 | 85.577 | 86.00446 |
| 70.56 | -0.87 | -0.08 | 12   | 32 | 62  | 270 | 92  | 12   | 92  | 91.542 | 596 | 85.487 | 85.91407 |
| 70.85 | -0.85 | -0.08 | 12   | 34 | 54  | 304 | 78  | 12   | 78  | 77.612 | 598 | 85.411 | 85.83769 |
| 71.14 | -0.82 | -0.08 | 12   | 26 | 54  | 294 | 90  | 12   | 90  | 89.552 | 600 | 85.378 | 85.8049  |
| 71.57 | -0.8  | -0.08 | 12   | 30 | 68  | 298 | 102 | 12   | 102 | 101.49 | 602 | 85.407 | 85.83353 |
| 71.75 | -0.77 | -0.08 | 12.1 | 28 | 66  | 292 | 102 | 12.1 | 102 | 101.49 | 604 | 85.498 | 85.92581 |
| 71.99 | -0.75 | -0.08 | 12.1 | 30 | 64  | 308 | 104 | 12.1 | 104 | 103.48 | 606 | 85.642 | 86.07038 |
| 72.28 | -0.72 | -0.08 | 12.1 | 30 | 56  | 308 | 100 | 12.1 | 100 | 99.502 | 607 | 85.82  | 86.24916 |
| 72.34 | -0.7  | -0.08 | 12.1 | 26 | 80  | 292 | 84  | 12.1 | 84  | 83.582 | 609 | 86.015 | 86.44548 |
| 72.69 | -0.67 | -0.09 | 12.1 | 26 | 78  | 302 | 72  | 12.1 | 72  | 71.642 | 611 | 86.219 | 86.6504  |
| 72.86 | -0.65 | -0.09 | 12.2 | 26 | 56  | 272 | 84  | 12.2 | 84  | 83.582 | 613 | 86.432 | 86.86449 |
| 73.06 | -0.63 | -0.09 | 12.2 | 32 | 76  | 294 | 86  | 12.2 | 86  | 85.572 | 615 | 86.662 | 87.09556 |
| 73.39 | -0.6  | -0.09 | 12.2 | 30 | 78  | 286 | 86  | 12.2 | 86  | 85.572 | 617 | 86.919 | 87.35338 |
| 73.46 | -0.58 | -0.09 | 12.2 | 32 | 82  | 292 | 100 | 12.2 | 100 | 99.502 | 619 | 87.208 | 87.64425 |
| 73.75 | -0.55 | -0.09 | 12.2 | 40 | 88  | 320 | 104 | 12.2 | 104 | 103.48 | 621 | 87.53  | 87.96766 |
| 74.05 | -0.53 | -0.09 | 12.3 | 26 | 88  | 296 | 96  | 12.3 | 96  | 95.522 | 623 | 87.877 | 88.31591 |
| 74.34 | -0.5  | -0.09 | 12.3 | 40 | 110 | 300 | 98  | 12.3 | 98  | 97.512 | 625 | 88.235 | 88.67583 |
| 74.76 | -0.48 | -0.09 | 12.3 | 28 | 112 | 318 | 86  | 12.3 | 86  | 85.572 | 627 | 88.588 | 89.03134 |
| 74.92 | -0.46 | -0.09 | 12.3 | 24 | 118 | 306 | 122 | 12.3 | 122 | 121.39 | 629 | 88.92  | 89.36481 |
| 75.21 | -0.43 | -0.09 | 12.3 | 30 | 110 | 284 | 102 | 12.3 | 102 | 101.49 | 631 | 89.213 | 89.65877 |
| 75.46 | -0.41 | -0.1  | 12.4 | 34 | 148 | 272 | 100 | 12.4 | 100 | 99.502 | 633 | 89.45  | 89.89731 |
| 75.53 | -0.39 | -0.1  | 12.4 | 24 | 122 | 296 | 102 | 12.4 | 102 | 101.49 | 634 | 89.62  | 90.06842 |
| 75.88 | -0.37 | -0.1  | 12.4 | 34 | 142 | 282 | 100 | 12.4 | 100 | 99.502 | 636 | 89.718 | 90.1663  |
| 76.03 | -0.34 | -0.1  | 12.4 | 28 | 176 | 288 | 128 | 12.4 | 128 | 127.36 | 638 | 89.744 | 90.19307 |
| 76.25 | -0.32 | -0.1  | 12.4 | 40 | 158 | 298 | 114 | 12.4 | 114 | 113.43 | 640 | 89.711 | 90.15922 |
| 76.55 | -0.29 | -0.1  | 12.5 | 26 | 168 | 304 | 118 | 12.5 | 118 | 117.41 | 642 | 89.635 | 90.08288 |
| 76.65 | -0.27 | -0.1  | 12.5 | 34 | 202 | 276 | 112 | 12.5 | 112 | 111.44 | 644 | 89.54  | 89.98742 |
| 76.97 | -0.25 | -0.1  | 12.5 | 30 | 218 | 302 | 130 | 12.5 | 130 | 129.35 | 646 | 89.451 | 89.89815 |
| 77.21 | -0.23 | -0.1  | 12.5 | 36 | 220 | 294 | 110 | 12.5 | 110 | 109.45 | 648 | 89.391 | 89.83783 |
| 77.53 | -0.21 | -0.1  | 12.5 | 24 | 246 | 294 | 132 | 12.5 | 132 | 131.34 | 650 | 89.376 | 89.8228  |
| 77.91 | -0.19 | -0.1  | 12.6 | 24 | 250 | 284 | 126 | 12.6 | 126 | 125.37 | 652 | 89.414 | 89.86067 |
| 78.05 | -0.17 | -0.1  | 12.6 | 30 | 242 | 304 | 138 | 12.6 | 138 | 137.31 | 654 | 89.504 | 89.95139 |
| 78.38 | -0.15 | -0.11 | 12.6 | 34 | 222 | 340 | 140 | 12.6 | 140 | 139.3  | 656 | 89.642 | 90.09012 |
| 78.58 | -0.13 | -0.11 | 12.6 | 34 | 248 | 296 | 150 | 12.6 | 150 | 149.25 | 658 | 89.822 | 90.2707  |
| 78.68 | -0.1  | -0.11 | 12.6 | 24 | 278 | 310 | 166 | 12.6 | 166 | 165.17 | 660 | 90.037 | 90.48747 |
| 79.02 | -0.08 | -0.11 | 12.7 | 40 | 230 | 280 | 160 | 12.7 | 160 | 159.2  | 661 | 90.284 | 90.73536 |
| 79.13 | -0.06 | -0.11 | 12.7 | 30 | 216 | 292 | 146 | 12.7 | 146 | 145.27 | 663 | 90.555 | 91.00796 |
| 79.41 | -0.04 | -0.11 | 12.7 | 20 | 218 | 318 | 144 | 12.7 | 144 | 143.28 | 665 | 90.842 | 91.29606 |
| 79.66 | -0.02 | -0.11 | 12.7 | 30 | 222 | 302 | 162 | 12.7 | 162 | 161.19 | 667 | 91.132 | 91.58746 |
| 79.76 | 0     | -0.11 | 12.7 | 20 | 176 | 282 | 124 | 12.7 | 124 | 123.38 | 669 | 91.412 | 91.86913 |

|       |      |       |      |    |     |     |     |      |     |        |     |        |          |
|-------|------|-------|------|----|-----|-----|-----|------|-----|--------|-----|--------|----------|
| 80.12 | 0.02 | -0.11 | 12.8 | 32 | 184 | 280 | 136 | 12.8 | 136 | 135.32 | 671 | 91.672 | 92.13072 |
| 80.38 | 0.04 | -0.11 | 12.8 | 20 | 164 | 288 | 126 | 12.8 | 126 | 125.37 | 673 | 91.908 | 92.36761 |
| 80.7  | 0.06 | -0.11 | 12.8 | 28 | 140 | 292 | 126 | 12.8 | 126 | 125.37 | 675 | 92.12  | 92.58067 |
| 81.03 | 0.08 | -0.11 | 12.8 | 28 | 124 | 294 | 124 | 12.8 | 124 | 123.38 | 677 | 92.313 | 92.77453 |
| 81.17 | 0.1  | -0.11 | 12.8 | 22 | 110 | 336 | 98  | 12.8 | 98  | 97.512 | 679 | 92.491 | 92.95384 |
| 81.56 | 0.12 | -0.11 | 12.9 | 34 | 94  | 304 | 88  | 12.9 | 88  | 87.562 | 681 | 92.658 | 93.12101 |
| 81.69 | 0.14 | -0.12 | 12.9 | 28 | 102 | 296 | 100 | 12.9 | 100 | 99.502 | 683 | 92.811 | 93.27549 |
| 81.83 | 0.16 | -0.12 | 12.9 | 32 | 100 | 302 | 98  | 12.9 | 98  | 97.512 | 685 | 92.949 | 93.4142  |
| 82.17 | 0.18 | -0.12 | 12.9 | 24 | 124 | 292 | 104 | 12.9 | 104 | 103.48 | 687 | 93.068 | 93.53315 |
| 82.29 | 0.2  | -0.12 | 12.9 | 24 | 80  | 292 | 114 | 12.9 | 114 | 113.43 | 688 | 93.164 | 93.62993 |
| 82.63 | 0.22 | -0.12 | 13   | 14 | 86  | 292 | 96  | 13   | 96  | 95.522 | 690 | 93.238 | 93.7045  |
| 82.82 | 0.24 | -0.12 | 13   | 36 | 82  | 314 | 106 | 13   | 106 | 105.47 | 692 | 93.293 | 93.7599  |
| 82.94 | 0.26 | -0.12 | 13   | 22 | 68  | 328 | 98  | 13   | 98  | 97.512 | 694 | 93.334 | 93.80081 |
| 83.3  | 0.28 | -0.12 | 13   | 30 | 84  | 322 | 84  | 13   | 84  | 83.582 | 696 | 93.366 | 93.83237 |
| 83.59 | 0.3  | -0.12 | 13   | 26 | 48  | 308 | 106 | 13   | 106 | 105.47 | 698 | 93.392 | 93.85854 |
| 83.96 | 0.32 | -0.12 | 13.1 | 24 | 70  | 300 | 92  | 13.1 | 92  | 91.542 | 700 | 93.415 | 93.88176 |
| 84.23 | 0.33 | -0.12 | 13.1 | 28 | 62  | 328 | 94  | 13.1 | 94  | 93.532 | 702 | 93.436 | 93.90289 |
| 84.41 | 0.35 | -0.12 | 13.1 | 24 | 58  | 292 | 120 | 13.1 | 120 | 119.4  | 704 | 93.455 | 93.92199 |
| 84.79 | 0.37 | -0.12 | 13.1 | 26 | 56  | 330 | 104 | 13.1 | 104 | 103.48 | 706 | 93.471 | 93.93867 |
| 84.9  | 0.39 | -0.13 | 13.1 | 22 | 62  | 292 | 108 | 13.1 | 108 | 107.46 | 708 | 93.485 | 93.95234 |
| 85.09 | 0.41 | -0.13 | 13.2 | 26 | 52  | 302 | 88  | 13.2 | 88  | 87.562 | 710 | 93.495 | 93.96224 |
| 85.38 | 0.42 | -0.13 | 13.2 | 24 | 64  | 274 | 90  | 13.2 | 90  | 89.552 | 712 | 93.5   | 93.96738 |
| 85.49 | 0.44 | -0.13 | 13.2 | 28 | 42  | 304 | 102 | 13.2 | 102 | 101.49 | 714 | 93.499 | 93.96675 |
| 85.89 | 0.46 | -0.13 | 13.2 | 28 | 48  | 314 | 82  | 13.2 | 82  | 81.592 | 715 | 93.492 | 93.95931 |
| 86.04 | 0.48 | -0.13 | 13.2 | 28 | 52  | 320 | 104 | 13.2 | 104 | 103.48 | 717 | 93.477 | 93.94444 |
| 86.21 | 0.49 | -0.13 | 13.3 | 26 | 48  | 310 | 92  | 13.3 | 92  | 91.542 | 719 | 93.455 | 93.92253 |
| 86.56 | 0.51 | -0.13 | 13.3 | 24 | 44  | 308 | 98  | 13.3 | 98  | 97.512 | 721 | 93.428 | 93.89474 |
| 86.83 | 0.53 | -0.13 | 13.3 | 26 | 48  | 312 | 108 | 13.3 | 108 | 107.46 | 723 | 93.396 | 93.86306 |
| 87.24 | 0.55 | -0.13 | 13.3 | 20 | 46  | 286 | 108 | 13.3 | 108 | 107.46 | 725 | 93.363 | 93.8295  |
| 87.44 | 0.56 | -0.13 | 13.3 | 20 | 50  | 312 | 118 | 13.3 | 118 | 117.41 | 727 | 93.329 | 93.79594 |
| 87.66 | 0.58 | -0.13 | 13.4 | 22 | 42  | 310 | 134 | 13.4 | 134 | 133.33 | 729 | 93.297 | 93.76384 |
| 87.98 | 0.6  | -0.13 | 13.4 | 22 | 42  | 334 | 110 | 13.4 | 110 | 109.45 | 731 | 93.268 | 93.73442 |
| 88.07 | 0.61 | -0.13 | 13.4 | 26 | 38  | 312 | 132 | 13.4 | 132 | 131.34 | 733 | 93.243 | 93.70918 |
| 88.36 | 0.63 | -0.14 | 13.4 | 16 | 40  | 292 | 116 | 13.4 | 116 | 115.42 | 735 | 93.224 | 93.69002 |
| 88.6  | 0.65 | -0.14 | 13.4 | 22 | 28  | 340 | 140 | 13.4 | 140 | 139.3  | 737 | 93.213 | 93.67914 |
| 88.73 | 0.66 | -0.14 | 13.5 | 18 | 42  | 302 | 148 | 13.5 | 148 | 147.26 | 739 | 93.212 | 93.67845 |
| 89.12 | 0.68 | -0.14 | 13.5 | 28 | 38  | 316 | 174 | 13.5 | 174 | 173.13 | 741 | 93.223 | 93.68906 |
| 89.23 | 0.69 | -0.14 | 13.5 | 22 | 40  | 276 | 144 | 13.5 | 144 | 143.28 | 742 | 93.244 | 93.71067 |
| 89.45 | 0.71 | -0.14 | 13.5 | 28 | 32  | 292 | 172 | 13.5 | 172 | 171.14 | 744 | 93.275 | 93.74153 |
| 89.83 | 0.72 | -0.14 | 13.5 | 24 | 52  | 286 | 180 | 13.5 | 180 | 179.1  | 746 | 93.312 | 93.77869 |
| 90.07 | 0.74 | -0.14 | 13.6 | 26 | 40  | 324 | 188 | 13.6 | 188 | 187.06 | 748 | 93.352 | 93.81841 |
| 90.51 | 0.76 | -0.14 | 13.6 | 28 | 32  | 314 | 182 | 13.6 | 182 | 181.09 | 750 | 93.39  | 93.8568  |
| 90.69 | 0.77 | -0.14 | 13.6 | 16 | 38  | 324 | 182 | 13.6 | 182 | 181.09 | 752 | 93.423 | 93.88998 |
| 90.92 | 0.79 | -0.14 | 13.6 | 34 | 32  | 312 | 158 | 13.6 | 158 | 157.21 | 754 | 93.447 | 93.91458 |
| 91.23 | 0.8  | -0.14 | 13.6 | 30 | 40  | 320 | 168 | 13.6 | 168 | 167.16 | 756 | 93.461 | 93.92783 |
| 91.3  | 0.82 | -0.14 | 13.7 | 30 | 38  | 314 | 172 | 13.7 | 172 | 171.14 | 758 | 93.461 | 93.92827 |
| 91.66 | 0.83 | -0.14 | 13.7 | 26 | 38  | 288 | 168 | 13.7 | 168 | 167.16 | 760 | 93.449 | 93.916   |

|        |      |       |      |    |    |     |     |      |     |        |     |        |          |
|--------|------|-------|------|----|----|-----|-----|------|-----|--------|-----|--------|----------|
| 91.85  | 0.85 | -0.14 | 13.7 | 28 | 32 | 316 | 182 | 13.7 | 182 | 181.09 | 762 | 93.426 | 93.89328 |
| 92.07  | 0.86 | -0.14 | 13.7 | 24 | 38 | 310 | 140 | 13.7 | 140 | 139.3  | 764 | 93.397 | 93.86406 |
| 92.43  | 0.87 | -0.15 | 13.7 | 22 | 46 | 324 | 120 | 13.7 | 120 | 119.4  | 766 | 93.367 | 93.83379 |
| 92.52  | 0.89 | -0.15 | 13.8 | 28 | 36 | 336 | 148 | 13.8 | 148 | 147.26 | 768 | 93.341 | 93.808   |
| 92.84  | 0.9  | -0.15 | 13.8 | 28 | 42 | 324 | 132 | 13.8 | 132 | 131.34 | 769 | 93.325 | 93.79114 |
| 93.18  | 0.92 | -0.15 | 13.8 | 18 | 24 | 312 | 98  | 13.8 | 98  | 97.512 | 771 | 93.319 | 93.78522 |
| 93.44  | 0.93 | -0.15 | 13.8 | 22 | 38 | 310 | 128 | 13.8 | 128 | 127.36 | 773 | 93.323 | 93.78973 |
| 93.89  | 0.94 | -0.15 | 13.8 | 26 | 22 | 334 | 112 | 13.8 | 112 | 111.44 | 775 | 93.335 | 93.80193 |
| 94.05  | 0.96 | -0.15 | 13.9 | 24 | 34 | 292 | 102 | 13.9 | 102 | 101.49 | 777 | 93.352 | 93.81827 |
| 94.35  | 0.97 | -0.15 | 13.9 | 20 | 38 | 324 | 118 | 13.9 | 118 | 117.41 | 779 | 93.369 | 93.83561 |
| 94.63  | 0.99 | -0.15 | 13.9 | 18 | 38 | 352 | 84  | 13.9 | 84  | 83.582 | 781 | 93.385 | 93.85237 |
| 94.71  | 1    | -0.15 | 13.9 | 26 | 26 | 298 | 110 | 13.9 | 110 | 109.45 | 783 | 93.402 | 93.86852 |
| 95.1   | 1.02 | -0.15 | 13.9 | 24 | 30 | 286 | 84  | 13.9 | 84  | 83.582 | 785 | 93.418 | 93.88512 |
| 95.28  | 1.03 | -0.15 | 14   | 26 | 36 | 310 | 100 | 14   | 100 | 99.502 | 787 | 93.436 | 93.9034  |
| 95.53  | 1.04 | -0.15 | 14   | 28 | 30 | 318 | 100 | 14   | 100 | 99.502 | 789 | 93.457 | 93.92391 |
| 95.86  | 1.06 | -0.15 | 14   | 20 | 32 | 314 | 92  | 14   | 92  | 91.542 | 791 | 93.479 | 93.94633 |
| 95.96  | 1.07 | -0.15 | 14   | 26 | 32 | 326 | 108 | 14   | 108 | 107.46 | 793 | 93.502 | 93.96965 |
| 96.33  | 1.08 | -0.15 | 14   | 26 | 34 | 310 | 98  | 14   | 98  | 97.512 | 795 | 93.525 | 93.99293 |
| 96.65  | 1.1  | -0.15 | 14.1 | 22 | 36 | 312 | 98  | 14.1 | 98  | 97.512 | 796 | 93.548 | 94.01571 |
| 96.94  | 1.11 | -0.15 | 14.1 | 30 | 34 | 308 | 114 | 14.1 | 114 | 113.43 | 798 | 93.571 | 94.03844 |
| 97.34  | 1.12 | -0.15 | 14.1 | 24 | 22 | 324 | 84  | 14.1 | 84  | 83.582 | 800 | 93.594 | 94.06194 |
| 97.49  | 1.13 | -0.15 | 14.1 | 28 | 28 | 328 | 86  | 14.1 | 86  | 85.572 | 802 | 93.619 | 94.08702 |
| 97.86  | 1.15 | -0.15 | 14.1 | 16 | 36 | 322 | 84  | 14.1 | 84  | 83.582 | 804 | 93.646 | 94.11392 |
| 98.06  | 1.16 | -0.15 | 14.2 | 22 | 30 | 356 | 76  | 14.2 | 76  | 75.622 | 806 | 93.674 | 94.14204 |
| 98.2   | 1.17 | -0.15 | 14.2 | 20 | 26 | 338 | 74  | 14.2 | 74  | 73.632 | 808 | 93.702 | 94.17035 |
| 98.58  | 1.19 | -0.15 | 14.2 | 22 | 28 | 328 | 88  | 14.2 | 88  | 87.562 | 810 | 93.729 | 94.19776 |
| 98.73  | 1.2  | -0.15 | 14.2 | 32 | 30 | 290 | 84  | 14.2 | 84  | 83.582 | 812 | 93.755 | 94.22371 |
| 99.02  | 1.21 | -0.15 | 14.2 | 20 | 38 | 302 | 90  | 14.2 | 90  | 89.552 | 814 | 93.779 | 94.24809 |
| 99.28  | 1.22 | -0.15 | 14.3 | 26 | 30 | 330 | 100 | 14.3 | 100 | 99.502 | 816 | 93.802 | 94.27123 |
| 99.4   | 1.24 | -0.16 | 14.3 | 24 | 34 | 324 | 92  | 14.3 | 92  | 91.542 | 818 | 93.824 | 94.29337 |
| 99.81  | 1.25 | -0.16 | 14.3 | 22 | 34 | 298 | 78  | 14.3 | 78  | 77.612 | 820 | 93.845 | 94.31441 |
| 100.1  | 1.26 | -0.16 | 14.3 | 22 | 24 | 344 | 82  | 14.3 | 82  | 81.592 | 822 | 93.864 | 94.33371 |
| 100.43 | 1.28 | -0.16 | 14.3 | 18 | 26 | 312 | 86  | 14.3 | 86  | 85.572 | 823 | 93.881 | 94.35042 |
| 100.78 | 1.29 | -0.16 | 14.4 | 18 | 30 | 346 | 86  | 14.4 | 86  | 85.572 | 825 | 93.894 | 94.36369 |
| 100.93 | 1.3  | -0.16 | 14.4 | 28 | 30 | 294 | 80  | 14.4 | 80  | 79.602 | 827 | 93.904 | 94.37323 |
| 101.33 | 1.32 | -0.16 | 14.4 | 18 | 26 | 306 | 104 | 14.4 | 104 | 103.48 | 829 | 93.909 | 94.379   |
| 101.49 | 1.33 | -0.16 | 14.4 | 18 | 32 | 320 | 90  | 14.4 | 90  | 89.552 | 831 | 93.912 | 94.38157 |
| 101.65 | 1.34 | -0.16 | 14.4 | 20 | 34 | 334 | 84  | 14.4 | 84  | 83.582 | 833 | 93.912 | 94.38134 |
| 102.02 | 1.36 | -0.16 | 14.5 | 18 | 16 | 328 | 100 | 14.5 | 100 | 99.502 | 835 | 93.909 | 94.37863 |
| 102.17 | 1.37 | -0.16 | 14.5 | 26 | 30 | 300 | 96  | 14.5 | 96  | 95.522 | 837 | 93.904 | 94.37347 |
| 102.51 | 1.38 | -0.16 | 14.5 | 20 | 32 | 322 | 90  | 14.5 | 90  | 89.552 | 839 | 93.896 | 94.36586 |
| 102.73 | 1.4  | -0.16 | 14.5 | 18 | 24 | 284 | 86  | 14.5 | 86  | 85.572 | 841 | 93.886 | 94.35587 |
| 102.87 | 1.41 | -0.16 | 14.5 | 28 | 22 | 322 | 104 | 14.5 | 104 | 103.48 | 843 | 93.875 | 94.34409 |
| 103.27 | 1.42 | -0.16 | 14.6 | 30 | 26 | 312 | 68  | 14.6 | 68  | 67.662 | 845 | 93.862 | 94.33111 |
| 103.58 | 1.43 | -0.16 | 14.6 | 10 | 36 | 288 | 86  | 14.6 | 86  | 85.572 | 847 | 93.848 | 94.31764 |
| 103.93 | 1.45 | -0.16 | 14.6 | 24 | 30 | 340 | 100 | 14.6 | 100 | 99.502 | 849 | 93.835 | 94.30406 |
| 104.22 | 1.46 | -0.16 | 14.6 | 18 | 30 | 352 | 76  | 14.6 | 76  | 75.622 | 850 | 93.821 | 94.29038 |

|        |      |       |      |    |    |     |     |      |     |        |     |        |          |
|--------|------|-------|------|----|----|-----|-----|------|-----|--------|-----|--------|----------|
| 104.41 | 1.47 | -0.16 | 14.6 | 20 | 28 | 308 | 94  | 14.6 | 94  | 93.532 | 852 | 93.807 | 94.2764  |
| 104.8  | 1.48 | -0.16 | 14.7 | 16 | 32 | 334 | 84  | 14.7 | 84  | 83.582 | 854 | 93.793 | 94.26228 |
| 104.92 | 1.49 | -0.16 | 14.7 | 20 | 26 | 308 | 86  | 14.7 | 86  | 85.572 | 856 | 93.78  | 94.24846 |
| 105.16 | 1.5  | -0.16 | 14.7 | 22 | 22 | 348 | 76  | 14.7 | 76  | 75.622 | 858 | 93.767 | 94.23632 |
| 105.49 | 1.52 | -0.16 | 14.7 | 26 | 26 | 298 | 92  | 14.7 | 92  | 91.542 | 860 | 93.759 | 94.22738 |
| 105.62 | 1.53 | -0.16 | 14.7 | 20 | 24 | 320 | 98  | 14.7 | 98  | 97.512 | 862 | 93.754 | 94.22288 |
| 106.02 | 1.54 | -0.17 | 14.8 | 24 | 18 | 294 | 80  | 14.8 | 80  | 79.602 | 864 | 93.754 | 94.22325 |
| 106.16 | 1.55 | -0.17 | 14.8 | 26 | 24 | 320 | 82  | 14.8 | 82  | 81.592 | 866 | 93.759 | 94.22789 |
| 106.37 | 1.57 | -0.17 | 14.8 | 26 | 20 | 332 | 92  | 14.8 | 92  | 91.542 | 868 | 93.766 | 94.23527 |
| 106.76 | 1.58 | -0.17 | 14.8 | 20 | 28 | 364 | 104 | 14.8 | 104 | 103.48 | 870 | 93.775 | 94.24399 |
| 107.02 | 1.59 | -0.17 | 14.8 | 16 | 22 | 310 | 78  | 14.8 | 78  | 77.612 | 872 | 93.784 | 94.25311 |
| 107.43 | 1.6  | -0.17 | 14.9 | 28 | 22 | 332 | 70  | 14.9 | 70  | 69.652 | 874 | 93.794 | 94.26282 |
| 107.66 | 1.62 | -0.17 | 14.9 | 24 | 30 | 336 | 92  | 14.9 | 92  | 91.542 | 876 | 93.805 | 94.27416 |
| 107.88 | 1.63 | -0.17 | 14.9 | 22 | 18 | 326 | 86  | 14.9 | 86  | 85.572 | 877 | 93.819 | 94.2885  |
| 108.23 | 1.64 | -0.17 | 14.9 | 22 | 30 | 310 | 90  | 14.9 | 90  | 89.552 | 879 | 93.838 | 94.30673 |
| 108.33 | 1.66 | -0.17 | 14.9 | 28 | 26 | 358 | 80  | 14.9 | 80  | 79.602 | 881 | 93.86  | 94.32889 |
| 108.63 | 1.67 | -0.17 | 15   | 20 | 28 | 320 | 78  | 15   | 78  | 77.612 | 883 | 93.885 | 94.35401 |
| 108.88 | 1.68 | -0.17 | 15   | 18 | 30 | 312 | 80  | 15   | 80  | 79.602 | 885 | 93.911 | 94.38078 |
| 109.06 | 1.69 | -0.17 | 15   | 32 | 30 | 312 | 88  | 15   | 88  | 87.562 | 887 | 93.938 | 94.40791 |
| 109.44 | 1.71 | -0.17 | 15   | 20 | 26 | 348 | 78  | 15   | 78  | 77.612 | 889 | 93.965 | 94.4348  |
| 109.56 | 1.72 | -0.17 | 15   | 28 | 28 | 294 | 88  | 15   | 88  | 87.562 | 891 | 93.991 | 94.46145 |
| 109.81 | 1.73 | -0.17 | 15.1 | 22 | 24 | 342 | 90  | 15.1 | 90  | 89.552 | 893 | 94.018 | 94.48806 |
| 110.22 | 1.74 | -0.17 | 15.1 | 26 | 24 | 344 | 100 | 15.1 | 100 | 99.502 | 895 | 94.044 | 94.51453 |
| 110.47 | 1.75 | -0.17 | 15.1 | 20 | 16 | 342 | 100 | 15.1 | 100 | 99.502 | 897 | 94.07  | 94.54024 |
| 110.91 | 1.77 | -0.17 | 15.1 | 32 | 24 | 332 | 90  | 15.1 | 90  | 89.552 | 899 | 94.093 | 94.56388 |
| 111.13 | 1.78 | -0.17 | 15.1 | 20 | 22 | 318 | 92  | 15.1 | 92  | 91.542 | 901 | 94.113 | 94.58394 |
| 111.38 | 1.79 | -0.17 | 15.2 | 16 | 34 | 342 | 84  | 15.2 | 84  | 83.582 | 903 | 94.129 | 94.59951 |
| 111.71 | 1.8  | -0.17 | 15.2 | 24 | 34 | 336 | 84  | 15.2 | 84  | 83.582 | 904 | 94.14  | 94.61047 |
| 111.79 | 1.82 | -0.17 | 15.2 | 10 | 24 | 332 | 70  | 15.2 | 70  | 69.652 | 906 | 94.147 | 94.61758 |
| 112.16 | 1.83 | -0.17 | 15.2 | 26 | 34 | 296 | 80  | 15.2 | 80  | 79.602 | 908 | 94.152 | 94.62245 |
| 112.36 | 1.84 | -0.17 | 15.2 | 28 | 24 | 344 | 88  | 15.2 | 88  | 87.562 | 910 | 94.156 | 94.62656 |
| 112.57 | 1.85 | -0.17 | 15.3 | 24 | 26 | 354 | 86  | 15.3 | 86  | 85.572 | 912 | 94.16  | 94.63102 |
| 112.93 | 1.87 | -0.17 | 15.3 | 24 | 30 | 330 | 80  | 15.3 | 80  | 79.602 | 914 | 94.165 | 94.63622 |
| 113.04 | 1.88 | -0.17 | 15.3 | 12 | 20 | 342 | 78  | 15.3 | 78  | 77.612 | 916 | 94.171 | 94.64196 |
| 113.35 | 1.9  | -0.17 | 15.3 | 18 | 22 | 352 | 94  | 15.3 | 94  | 93.532 | 918 | 94.177 | 94.64768 |
| 113.72 | 1.91 | -0.18 | 15.3 | 22 | 28 | 324 | 106 | 15.3 | 106 | 105.47 | 920 | 94.182 | 94.65291 |
| 113.98 | 1.92 | -0.18 | 15.4 | 18 | 32 | 338 | 98  | 15.4 | 98  | 97.512 | 922 | 94.186 | 94.65719 |
| 114.42 | 1.94 | -0.18 | 15.4 | 22 | 28 | 354 | 80  | 15.4 | 80  | 79.602 | 924 | 94.189 | 94.66006 |
| 114.61 | 1.95 | -0.18 | 15.4 | 24 | 26 | 326 | 88  | 15.4 | 88  | 87.562 | 926 | 94.19  | 94.66071 |
| 114.91 | 1.96 | -0.18 | 15.4 | 14 | 20 | 314 | 92  | 15.4 | 92  | 91.542 | 928 | 94.187 | 94.6581  |
| 115.18 | 1.98 | -0.18 | 15.4 | 16 | 28 | 340 | 90  | 15.4 | 90  | 89.552 | 930 | 94.18  | 94.65054 |
| 115.28 | 1.99 | -0.18 | 15.5 | 30 | 26 | 360 | 82  | 15.5 | 82  | 81.592 | 931 | 94.166 | 94.63653 |
| 115.68 | 2    | -0.18 | 15.5 | 16 | 20 | 334 | 86  | 15.5 | 86  | 85.572 | 933 | 94.144 | 94.61483 |
| 115.83 | 2.02 | -0.18 | 15.5 | 24 | 24 | 322 | 92  | 15.5 | 92  | 91.542 | 935 | 94.114 | 94.58506 |
| 116.07 | 2.03 | -0.18 | 15.5 | 14 | 38 | 336 | 88  | 15.5 | 88  | 87.562 | 937 | 94.077 | 94.54743 |
| 116.4  | 2.05 | -0.18 | 15.5 | 22 | 18 | 338 | 86  | 15.5 | 86  | 85.572 | 939 | 94.032 | 94.50248 |
| 116.49 | 2.06 | -0.18 | 15.6 | 14 | 28 | 320 | 92  | 15.6 | 92  | 91.542 | 941 | 93.981 | 94.45044 |

|        |      |       |      |    |    |     |     |      |     |        |      |        |          |
|--------|------|-------|------|----|----|-----|-----|------|-----|--------|------|--------|----------|
| 116.88 | 2.08 | -0.18 | 15.6 | 20 | 30 | 336 | 94  | 15.6 | 94  | 93.532 | 943  | 93.921 | 94.39097 |
| 117.18 | 2.09 | -0.18 | 15.6 | 20 | 28 | 326 | 78  | 15.6 | 78  | 77.612 | 945  | 93.853 | 94.32273 |
| 117.48 | 2.11 | -0.18 | 15.6 | 34 | 26 | 334 | 98  | 15.6 | 98  | 97.512 | 947  | 93.775 | 94.24401 |
| 117.89 | 2.12 | -0.18 | 15.6 | 30 | 20 | 340 | 84  | 15.6 | 84  | 83.582 | 949  | 93.685 | 94.1531  |
| 118.05 | 2.14 | -0.18 | 15.7 | 26 | 32 | 338 | 98  | 15.7 | 98  | 97.512 | 951  | 93.582 | 94.04941 |
| 118.38 | 2.15 | -0.18 | 15.7 | 22 | 34 | 342 | 84  | 15.7 | 84  | 83.582 | 953  | 93.466 | 93.93351 |
| 118.58 | 2.16 | -0.18 | 15.7 | 20 | 20 | 340 | 94  | 15.7 | 94  | 93.532 | 955  | 93.341 | 93.80795 |
| 118.72 | 2.18 | -0.18 | 15.7 | 24 | 24 | 326 | 96  | 15.7 | 96  | 95.522 | 957  | 93.21  | 93.67629 |
| 119.11 | 2.2  | -0.18 | 15.7 | 14 | 18 | 338 | 72  | 15.7 | 72  | 71.642 | 958  | 93.078 | 93.54334 |
| 119.23 | 2.21 | -0.18 | 15.8 | 24 | 28 | 340 | 80  | 15.8 | 80  | 79.602 | 960  | 92.949 | 93.41407 |
| 119.54 | 2.23 | -0.18 | 15.8 | 18 | 28 | 308 | 76  | 15.8 | 76  | 75.622 | 962  | 92.829 | 93.29347 |
| 119.79 | 2.24 | -0.18 | 15.8 | 30 | 32 | 352 | 80  | 15.8 | 80  | 79.602 | 964  | 92.723 | 93.18624 |
| 119.91 | 2.26 | -0.18 | 15.8 | 22 | 32 | 356 | 76  | 15.8 | 76  | 75.622 | 966  | 92.633 | 93.09657 |
| 120.31 | 2.27 | -0.18 | 15.8 | 26 | 34 | 352 | 86  | 15.8 | 86  | 85.572 | 968  | 92.565 | 93.02745 |
| 120.62 | 2.29 | -0.18 | 15.9 | 28 | 22 | 338 | 80  | 15.9 | 80  | 79.602 | 970  | 92.518 | 92.98065 |
| 120.95 | 2.3  | -0.19 | 15.9 | 22 | 36 | 356 | 96  | 15.9 | 96  | 95.522 | 972  | 92.494 | 92.95622 |
| 121.3  | 2.32 | -0.19 | 15.9 | 26 | 24 | 338 | 88  | 15.9 | 88  | 87.562 | 974  | 92.491 | 92.95297 |
| 121.44 | 2.33 | -0.19 | 15.9 | 14 | 22 | 356 | 74  | 15.9 | 74  | 73.632 | 976  | 92.506 | 92.9689  |
| 121.84 | 2.35 | -0.19 | 15.9 | 26 | 34 | 356 | 68  | 15.9 | 68  | 67.662 | 978  | 92.539 | 93.00198 |
| 121.97 | 2.37 | -0.19 | 16   | 26 | 20 | 350 | 64  | 16   | 64  | 63.682 | 980  | 92.588 | 93.05045 |
| 122.14 | 2.38 | -0.19 | 16   | 22 | 30 | 342 | 90  | 16   | 90  | 89.552 | 982  | 92.65  | 93.11276 |
| 122.51 | 2.4  | -0.19 | 16   | 26 | 22 | 312 | 76  | 16   | 76  | 75.622 | 984  | 92.723 | 93.187   |
| 122.63 | 2.41 | -0.19 | 16   | 12 | 32 | 328 | 88  | 16   | 88  | 87.562 | 985  | 92.806 | 93.27022 |
| 123    | 2.43 | -0.19 | 16   | 28 | 20 | 384 | 92  | 16   | 92  | 91.542 | 987  | 92.894 | 93.35803 |
| 123.19 | 2.45 | -0.19 | 16.1 | 22 | 32 | 312 | 70  | 16.1 | 70  | 69.652 | 989  | 92.98  | 93.44487 |
| 123.36 | 2.46 | -0.19 | 16.1 | 24 | 24 | 350 | 84  | 16.1 | 84  | 83.582 | 991  | 93.06  | 93.52482 |
| 123.77 | 2.48 | -0.19 | 16.1 | 20 | 28 | 374 | 96  | 16.1 | 96  | 95.522 | 993  | 93.127 | 93.59247 |
| 124.05 | 2.5  | -0.19 | 16.1 | 26 | 26 | 360 | 92  | 16.1 | 92  | 91.542 | 995  | 93.178 | 93.64346 |
| 124.43 | 2.51 | -0.19 | 16.1 | 12 | 24 | 370 | 102 | 16.1 | 102 | 101.49 | 997  | 93.209 | 93.67472 |
| 124.69 | 2.53 | -0.19 | 16.2 | 24 | 22 | 322 | 84  | 16.2 | 84  | 83.582 | 999  | 93.218 | 93.68391 |
| 124.9  | 2.55 | -0.19 | 16.2 | 22 | 26 | 374 | 84  | 16.2 | 84  | 83.582 | 1001 | 93.203 | 93.66874 |
| 125.27 | 2.56 | -0.19 | 16.2 | 22 | 32 | 360 | 96  | 16.2 | 96  | 95.522 | 1003 | 93.16  | 93.62609 |
| 125.37 | 2.58 | -0.19 | 16.2 | 16 | 30 | 346 | 76  | 16.2 | 76  | 75.622 | 1005 | 93.087 | 93.55209 |
| 125.62 | 2.6  | -0.19 | 16.2 | 18 | 20 | 366 | 88  | 16.2 | 88  | 87.562 | 1007 | 92.978 | 93.44239 |
| 125.93 | 2.62 | -0.19 | 16.3 | 14 | 28 | 350 | 96  | 16.3 | 96  | 95.522 | 1009 | 92.829 | 93.29334 |
| 126.06 | 2.64 | -0.19 | 16.3 | 24 | 40 | 350 | 80  | 16.3 | 80  | 79.602 | 1011 | 92.64  | 93.10299 |
| 126.45 | 2.65 | -0.19 | 16.3 | 22 | 30 | 364 | 108 | 16.3 | 108 | 107.46 | 1012 | 92.41  | 92.87189 |
| 126.61 | 2.67 | -0.19 | 16.3 | 26 | 28 | 328 | 62  | 16.3 | 62  | 61.692 | 1014 | 92.142 | 92.6028  |
| 126.82 | 2.69 | -0.19 | 16.3 | 20 | 24 | 376 | 82  | 16.3 | 82  | 81.592 | 1016 | 91.841 | 92.29996 |
| 127.22 | 2.71 | -0.2  | 16.4 | 20 | 28 | 358 | 96  | 16.4 | 96  | 95.522 | 1018 | 91.51  | 91.96741 |
| 127.47 | 2.73 | -0.2  | 16.4 | 18 | 20 | 332 | 96  | 16.4 | 96  | 95.522 | 1020 | 91.152 | 91.60781 |
| 127.88 | 2.75 | -0.2  | 16.4 | 16 | 32 | 316 | 70  | 16.4 | 70  | 69.652 | 1022 | 90.769 | 91.2231  |
| 128.1  | 2.77 | -0.2  | 16.4 | 18 | 22 | 324 | 98  | 16.4 | 98  | 97.512 | 1024 | 90.363 | 90.81458 |
| 128.31 | 2.79 | -0.2  | 16.4 | 24 | 34 | 326 | 92  | 16.4 | 92  | 91.542 | 1026 | 89.936 | 90.38525 |
| 128.66 | 2.81 | -0.2  | 16.5 | 18 | 32 | 372 | 74  | 16.5 | 74  | 73.632 | 1028 | 89.494 | 89.94108 |
| 128.74 | 2.83 | -0.2  | 16.5 | 28 | 28 | 344 | 84  | 16.5 | 84  | 83.582 | 1030 | 89.046 | 89.49136 |
| 129.07 | 2.85 | -0.2  | 16.5 | 28 | 34 | 364 | 70  | 16.5 | 70  | 69.652 | 1032 | 88.604 | 89.04728 |

|        |      |       |      |    |    |     |     |      |     |        |      |        |          |
|--------|------|-------|------|----|----|-----|-----|------|-----|--------|------|--------|----------|
| 129.3  | 2.87 | -0.2  | 16.5 | 22 | 34 | 352 | 68  | 16.5 | 68  | 67.662 | 1034 | 88.178 | 88.61899 |
| 129.47 | 2.89 | -0.2  | 16.5 | 28 | 30 | 362 | 86  | 16.5 | 86  | 85.572 | 1036 | 87.774 | 88.21283 |
| 129.86 | 2.91 | -0.2  | 16.6 | 10 | 26 | 342 | 84  | 16.6 | 84  | 83.582 | 1038 | 87.392 | 87.82918 |
| 129.98 | 2.93 | -0.2  | 16.6 | 30 | 20 | 358 | 66  | 16.6 | 66  | 65.672 | 1039 | 87.027 | 87.46244 |
| 130.23 | 2.95 | -0.2  | 16.6 | 22 | 32 | 326 | 100 | 16.6 | 100 | 99.502 | 1041 | 86.669 | 87.10266 |
| 130.64 | 2.98 | -0.2  | 16.6 | 30 | 30 | 396 | 84  | 16.6 | 84  | 83.582 | 1043 | 86.307 | 86.73815 |
| 130.87 | 3    | -0.2  | 16.6 | 24 | 26 | 334 | 86  | 16.6 | 86  | 85.572 | 1045 | 85.928 | 86.35802 |
| 131.29 | 3.02 | -0.2  | 16.7 | 16 | 30 | 348 | 98  | 16.7 | 98  | 97.512 | 1047 | 85.526 | 85.954   |
| 131.47 | 3.04 | -0.2  | 16.7 | 20 | 24 | 364 | 88  | 16.7 | 88  | 87.562 | 1049 | 85.096 | 85.5212  |
| 131.73 | 3.07 | -0.2  | 16.7 | 24 | 38 | 336 | 98  | 16.7 | 98  | 97.512 | 1051 | 84.635 | 85.05798 |
| 132.04 | 3.09 | -0.2  | 16.7 | 26 | 26 | 328 | 102 | 16.7 | 102 | 101.49 | 1053 | 84.145 | 84.56599 |
| 132.12 | 3.12 | -0.2  | 16.7 | 28 | 28 | 340 | 84  | 16.7 | 84  | 83.582 | 1055 | 83.631 | 84.04955 |
| 132.5  | 3.14 | -0.2  | 16.8 | 24 | 30 | 356 | 98  | 16.8 | 98  | 97.512 | 1057 | 83.1   | 83.51566 |
| 132.69 | 3.16 | -0.2  | 16.8 | 16 | 28 | 308 | 86  | 16.8 | 86  | 85.572 | 1059 | 82.561 | 82.97385 |
| 132.91 | 3.19 | -0.2  | 16.8 | 14 | 30 | 304 | 94  | 16.8 | 94  | 93.532 | 1061 | 82.025 | 82.43527 |
| 133.26 | 3.21 | -0.2  | 16.8 | 28 | 32 | 370 | 80  | 16.8 | 80  | 79.602 | 1063 | 81.504 | 81.91152 |
| 133.36 | 3.24 | -0.2  | 16.8 | 18 | 28 | 338 | 104 | 16.8 | 104 | 103.48 | 1065 | 81.008 | 81.41296 |
| 133.71 | 3.26 | -0.2  | 16.9 | 12 | 40 | 388 | 76  | 16.9 | 76  | 75.622 | 1066 | 80.545 | 80.94803 |
| 134.04 | 3.29 | -0.2  | 16.9 | 24 | 28 | 348 | 90  | 16.9 | 90  | 89.552 | 1068 | 80.122 | 80.52302 |
| 134.3  | 3.31 | -0.2  | 16.9 | 24 | 36 | 320 | 76  | 16.9 | 76  | 75.622 | 1070 | 79.745 | 80.14324 |
| 134.71 | 3.34 | -0.2  | 16.9 | 20 | 24 | 358 | 90  | 16.9 | 90  | 89.552 | 1072 | 79.416 | 79.81337 |
| 134.88 | 3.36 | -0.2  | 16.9 | 22 | 36 | 362 | 74  | 16.9 | 74  | 73.632 | 1074 | 79.142 | 79.53777 |
| 135.18 | 3.39 | -0.2  | 17   | 22 | 30 | 338 | 96  | 17   | 96  | 95.522 | 1076 | 78.925 | 79.31915 |
| 135.43 | 3.41 | -0.2  | 17   | 16 | 36 | 312 | 86  | 17   | 86  | 85.572 | 1078 | 78.763 | 79.15722 |
| 135.52 | 3.44 | -0.2  | 17   | 18 | 28 | 370 | 88  | 17   | 88  | 87.562 | 1080 | 78.654 | 79.04743 |
| 135.9  | 3.47 | -0.2  | 17   | 16 | 38 | 358 | 72  | 17   | 72  | 71.642 | 1082 | 78.589 | 78.98165 |
| 136.08 | 3.49 | -0.2  | 17   | 18 | 38 | 352 | 82  | 17   | 82  | 81.592 | 1084 | 78.557 | 78.94987 |
| 136.36 | 3.52 | -0.21 | 17.1 | 24 | 50 | 304 | 94  | 17.1 | 94  | 93.532 | 1086 | 78.55  | 78.94272 |
| 136.64 | 3.54 | -0.21 | 17.1 | 24 | 34 | 334 | 94  | 17.1 | 94  | 93.532 | 1088 | 78.56  | 78.95297 |
| 136.73 | 3.57 | -0.21 | 17.1 | 22 | 46 | 368 | 94  | 17.1 | 94  | 93.532 | 1090 | 78.583 | 78.97572 |
| 137.12 | 3.59 | -0.21 | 17.1 | 18 | 40 | 354 | 96  | 17.1 | 96  | 95.522 | 1092 | 78.614 | 79.00666 |
| 137.42 | 3.62 | -0.21 | 17.1 | 22 | 34 | 336 | 94  | 17.1 | 94  | 93.532 | 1093 | 78.647 | 79.04027 |
| 137.7  | 3.65 | -0.21 | 17.2 | 28 | 42 | 326 | 94  | 17.2 | 94  | 93.532 | 1095 | 78.675 | 79.06853 |
| 138.08 | 3.68 | -0.21 | 17.2 | 20 | 50 | 370 | 100 | 17.2 | 100 | 99.502 | 1097 | 78.688 | 79.08167 |
| 138.23 | 3.71 | -0.21 | 17.2 | 20 | 48 | 360 | 88  | 17.2 | 88  | 87.562 | 1099 | 78.677 | 79.07028 |
| 138.57 | 3.74 | -0.21 | 17.2 | 26 | 46 | 328 | 80  | 17.2 | 80  | 79.602 | 1101 | 78.635 | 79.02846 |
| 138.76 | 3.77 | -0.21 | 17.2 | 18 | 42 | 374 | 94  | 17.2 | 94  | 93.532 | 1103 | 78.563 | 78.9557  |
| 138.91 | 3.8  | -0.21 | 17.3 | 14 | 50 | 340 | 110 | 17.3 | 110 | 109.45 | 1105 | 78.465 | 78.85733 |
| 139.29 | 3.83 | -0.21 | 17.3 | 16 | 48 | 338 | 100 | 17.3 | 100 | 99.502 | 1107 | 78.351 | 78.7427  |
| 139.44 | 3.86 | -0.21 | 17.3 | 12 | 50 | 362 | 96  | 17.3 | 96  | 95.522 | 1109 | 78.231 | 78.62236 |
| 139.74 | 3.89 | -0.21 | 17.3 | 20 | 44 | 366 | 90  | 17.3 | 90  | 89.552 | 1111 | 78.114 | 78.50504 |
| 139.97 | 3.92 | -0.21 | 17.3 | 14 | 62 | 366 | 90  | 17.3 | 90  | 89.552 | 1113 | 78.007 | 78.39653 |
| 140.09 | 3.95 | -0.21 | 17.4 | 20 | 38 | 370 | 78  | 17.4 | 78  | 77.612 | 1115 | 77.91  | 78.29996 |
| 140.5  | 3.98 | -0.21 | 17.4 | 26 | 48 | 360 | 84  | 17.4 | 84  | 83.582 | 1117 | 77.829 | 78.21808 |
| 140.77 | 4.02 | -0.21 | 17.4 | 24 | 48 | 332 | 96  | 17.4 | 96  | 95.522 | 1119 | 77.766 | 78.1551  |
| 141.1  | 4.05 | -0.21 | 17.4 | 22 | 68 | 348 | 94  | 17.4 | 94  | 93.532 | 1120 | 77.729 | 78.11783 |
| 141.43 | 4.08 | -0.22 | 17.4 | 24 | 54 | 322 | 86  | 17.4 | 86  | 85.572 | 1122 | 77.726 | 78.11496 |

|        |      |       |      |    |     |     |     |      |     |        |      |        |          |
|--------|------|-------|------|----|-----|-----|-----|------|-----|--------|------|--------|----------|
| 141.57 | 4.11 | -0.22 | 17.5 | 22 | 58  | 318 | 98  | 17.5 | 98  | 97.512 | 1124 | 77.766 | 78.15525 |
| 141.96 | 4.14 | -0.22 | 17.5 | 32 | 54  | 384 | 92  | 17.5 | 92  | 91.542 | 1126 | 77.856 | 78.24532 |
| 142.09 | 4.17 | -0.22 | 17.5 | 20 | 74  | 400 | 88  | 17.5 | 88  | 87.562 | 1128 | 77.998 | 78.38838 |
| 142.29 | 4.21 | -0.22 | 17.5 | 20 | 82  | 370 | 94  | 17.5 | 94  | 93.532 | 1130 | 78.193 | 78.58393 |
| 142.65 | 4.24 | -0.22 | 17.5 | 24 | 76  | 376 | 82  | 17.5 | 82  | 81.592 | 1132 | 78.436 | 78.82863 |
| 142.75 | 4.27 | -0.22 | 17.6 | 12 | 90  | 302 | 80  | 17.6 | 80  | 79.602 | 1134 | 78.723 | 79.11689 |
| 143.13 | 4.31 | -0.22 | 17.6 | 24 | 100 | 350 | 74  | 17.6 | 74  | 73.632 | 1136 | 79.046 | 79.44111 |
| 143.3  | 4.34 | -0.22 | 17.6 | 16 | 78  | 340 | 84  | 17.6 | 84  | 83.582 | 1138 | 79.394 | 79.79142 |
| 143.46 | 4.38 | -0.22 | 17.6 | 20 | 96  | 332 | 96  | 17.6 | 96  | 95.522 | 1140 | 79.757 | 80.15554 |
| 143.87 | 4.41 | -0.22 | 17.6 | 20 | 124 | 320 | 84  | 17.6 | 84  | 83.582 | 1142 | 80.119 | 80.51917 |
| 144.13 | 4.45 | -0.22 | 17.7 | 20 | 152 | 366 | 74  | 17.7 | 74  | 73.632 | 1144 | 80.465 | 80.86749 |
| 144.51 | 4.49 | -0.22 | 17.7 | 24 | 122 | 354 | 102 | 17.7 | 102 | 101.49 | 1146 | 80.783 | 81.18731 |
| 144.77 | 4.52 | -0.22 | 17.7 | 20 | 140 | 338 | 94  | 17.7 | 94  | 93.532 | 1147 | 81.063 | 81.46874 |
| 144.96 | 4.56 | -0.22 | 17.7 | 18 | 154 | 394 | 96  | 17.7 | 96  | 95.522 | 1149 | 81.3   | 81.70626 |
| 145.35 | 4.6  | -0.22 | 17.7 | 22 | 174 | 350 | 86  | 17.7 | 86  | 85.572 | 1151 | 81.491 | 81.89862 |
| 145.45 | 4.64 | -0.22 | 17.8 | 16 | 178 | 348 | 94  | 17.8 | 94  | 93.532 | 1153 | 81.64  | 82.04773 |
| 145.72 | 4.68 | -0.22 | 17.8 | 26 | 172 | 318 | 88  | 17.8 | 88  | 87.562 | 1155 | 81.749 | 82.15778 |
| 146    | 4.72 | -0.22 | 17.8 | 16 | 194 | 360 | 84  | 17.8 | 84  | 83.582 | 1157 | 81.825 | 82.23438 |
| 146.14 | 4.76 | -0.22 | 17.8 | 22 | 228 | 350 | 112 | 17.8 | 112 | 111.44 | 1159 | 81.875 | 82.28487 |
| 146.54 | 4.8  | -0.22 | 17.8 | 20 | 204 | 348 | 88  | 17.8 | 88  | 87.562 | 1161 | 81.909 | 82.31878 |
| 146.67 | 4.83 | -0.22 | 17.9 | 18 | 242 | 366 | 70  | 17.9 | 70  | 69.652 | 1163 | 81.939 | 82.34853 |
| 146.87 | 4.87 | -0.22 | 17.9 | 16 | 264 | 392 | 80  | 17.9 | 80  | 79.602 | 1165 | 81.979 | 82.38901 |
| 147.27 | 4.91 | -0.22 | 17.9 | 18 | 286 | 396 | 102 | 17.9 | 102 | 101.49 | 1167 | 82.046 | 82.45632 |
| 147.5  | 4.95 | -0.22 | 17.9 | 26 | 252 | 340 | 96  | 17.9 | 96  | 95.522 | 1169 | 82.155 | 82.56556 |
| 147.92 | 4.99 | -0.22 | 17.9 | 20 | 264 | 342 | 98  | 17.9 | 98  | 97.512 | 1171 | 82.317 | 82.72843 |
| 148.13 | 5.03 | -0.22 | 18   | 18 | 274 | 336 | 86  | 18   | 86  | 85.572 | 1173 | 82.539 | 82.95161 |
| 148.36 | 5.08 | -0.22 | 18   | 16 | 256 | 346 | 94  | 18   | 94  | 93.532 | 1174 | 82.822 | 83.2363  |
| 148.71 | 5.12 | -0.22 | 18   | 16 | 274 | 390 | 114 | 18   | 114 | 113.43 | 1176 | 83.163 | 83.57918 |
| 148.77 | 5.16 | -0.22 | 18   | 26 | 248 | 370 | 96  | 18   | 96  | 95.522 | 1178 | 83.556 | 83.97366 |
| 149.13 | 5.21 | -0.22 | 18   | 22 | 240 | 360 | 118 | 18   | 118 | 117.41 | 1180 | 83.991 | 84.41085 |
| 149.34 | 5.25 | -0.22 | 18.1 | 22 | 228 | 360 | 106 | 18.1 | 106 | 105.47 | 1182 | 84.458 | 84.88008 |
| 149.52 | 5.3  | -0.22 | 18.1 | 26 | 186 | 312 | 100 | 18.1 | 100 | 99.502 | 1184 | 84.944 | 85.36874 |
| 149.89 | 5.34 | -0.22 | 18.1 | 16 | 174 | 360 | 90  | 18.1 | 90  | 89.552 | 1186 | 85.435 | 85.86225 |
| 149.99 | 5.39 | -0.22 | 18.1 | 26 | 174 | 358 | 96  | 18.1 | 96  | 95.522 | 1188 | 85.915 | 86.34455 |
| 150.26 | 5.43 | -0.22 | 18.1 | 16 | 164 | 326 | 102 | 18.1 | 102 | 101.49 | 1190 | 86.368 | 86.79981 |
| 150.65 | 5.48 | -0.23 | 18.2 | 18 | 144 | 382 | 98  | 18.2 | 98  | 97.512 | 1192 | 86.78  | 87.21402 |
| 150.88 | 5.52 | -0.23 | 18.2 | 16 | 128 | 324 | 106 | 18.2 | 106 | 105.47 | 1194 | 87.141 | 87.57708 |
| 151.3  | 5.57 | -0.23 | 18.2 | 16 | 96  | 354 | 100 | 18.2 | 100 | 99.502 | 1196 | 87.447 | 87.88392 |
| 151.5  | 5.61 | -0.23 | 18.2 | 18 | 124 | 346 | 106 | 18.2 | 106 | 105.47 | 1198 | 87.697 | 88.13505 |
| 151.75 | 5.66 | -0.23 | 18.2 | 24 | 102 | 294 | 114 | 18.2 | 114 | 113.43 | 1200 | 87.896 | 88.33591 |
| 152.07 | 5.71 | -0.23 | 18.3 | 20 | 104 | 352 | 102 | 18.3 | 102 | 101.49 | 1201 | 88.055 | 88.49559 |
| 152.13 | 5.76 | -0.23 | 18.3 | 14 | 100 | 360 | 130 | 18.3 | 130 | 129.35 | 1203 | 88.184 | 88.62528 |
| 152.51 | 5.8  | -0.23 | 18.3 | 24 | 98  | 366 | 118 | 18.3 | 118 | 117.41 | 1205 | 88.295 | 88.73675 |
| 152.69 | 5.85 | -0.23 | 18.3 | 22 | 88  | 374 | 118 | 18.3 | 118 | 117.41 | 1207 | 88.399 | 88.84106 |
| 152.9  | 5.9  | -0.23 | 18.3 | 16 | 86  | 350 | 134 | 18.3 | 134 | 133.33 | 1209 | 88.505 | 88.948   |
| 153.23 | 5.95 | -0.23 | 18.4 | 24 | 76  | 358 | 122 | 18.4 | 122 | 121.39 | 1211 | 88.622 | 89.06531 |
| 153.32 | 6    | -0.23 | 18.4 | 22 | 64  | 368 | 120 | 18.4 | 120 | 119.4  | 1213 | 88.755 | 89.19855 |

|        |      |       |      |    |    |     |     |      |     |        |      |        |          |
|--------|------|-------|------|----|----|-----|-----|------|-----|--------|------|--------|----------|
| 153.67 | 6.05 | -0.23 | 18.4 | 18 | 74 | 384 | 134 | 18.4 | 134 | 133.33 | 1215 | 88.906 | 89.35042 |
| 153.98 | 6.1  | -0.23 | 18.4 | 20 | 68 | 360 | 114 | 18.4 | 114 | 113.43 | 1217 | 89.075 | 89.52081 |
| 154.24 | 6.15 | -0.23 | 18.4 | 16 | 68 | 354 | 124 | 18.4 | 124 | 123.38 | 1219 | 89.261 | 89.70691 |
| 154.64 | 6.2  | -0.23 | 18.5 | 26 | 64 | 352 | 118 | 18.5 | 118 | 117.41 | 1221 | 89.457 | 89.90414 |
| 154.81 | 6.25 | -0.23 | 18.5 | 22 | 50 | 360 | 110 | 18.5 | 110 | 109.45 | 1223 | 89.659 | 90.10712 |
| 155.11 | 6.3  | -0.23 | 18.5 | 18 | 48 | 354 | 106 | 18.5 | 106 | 105.47 | 1225 | 89.862 | 90.31099 |
| 155.34 | 6.35 | -0.23 | 18.5 | 16 | 70 | 376 | 102 | 18.5 | 102 | 101.49 | 1227 | 90.062 | 90.51186 |
| 155.44 | 6.41 | -0.23 | 18.5 | 20 | 52 | 372 | 126 | 18.5 | 126 | 125.37 | 1228 | 90.256 | 90.70713 |
| 155.83 | 6.46 | -0.23 | 18.6 | 20 | 58 | 358 | 90  | 18.6 | 90  | 89.552 | 1230 | 90.443 | 90.89537 |
| 155.95 | 6.51 | -0.23 | 18.6 | 16 | 60 | 342 | 118 | 18.6 | 118 | 117.41 | 1232 | 90.623 | 91.07588 |
| 156.2  | 6.57 | -0.23 | 18.6 | 16 | 46 | 368 | 108 | 18.6 | 108 | 107.46 | 1234 | 90.795 | 91.24856 |
| 156.48 | 6.62 | -0.23 | 18.6 | 20 | 48 | 340 | 114 | 18.6 | 114 | 113.43 | 1236 | 90.959 | 91.41412 |
| 156.57 | 6.67 | -0.23 | 18.6 | 14 | 38 | 334 | 108 | 18.6 | 108 | 107.46 | 1238 | 91.118 | 91.57401 |
| 156.97 | 6.73 | -0.24 | 18.7 | 16 | 46 | 374 | 92  | 18.7 | 92  | 91.542 | 1240 | 91.274 | 91.73082 |
| 157.24 | 6.78 | -0.24 | 18.7 | 14 | 52 | 356 | 108 | 18.7 | 108 | 107.46 | 1242 | 91.431 | 91.88818 |
| 157.53 | 6.84 | -0.24 | 18.7 | 18 | 38 | 368 | 124 | 18.7 | 124 | 123.38 | 1244 | 91.592 | 92.05041 |
| 157.88 | 6.9  | -0.24 | 18.7 | 18 | 42 | 340 | 98  | 18.7 | 98  | 97.512 | 1246 | 91.763 | 92.22191 |
| 158.02 | 6.95 | -0.24 | 18.7 | 14 | 40 | 358 | 126 | 18.7 | 126 | 125.37 | 1248 | 91.947 | 92.40668 |
| 158.37 | 7.01 | -0.24 | 18.8 | 18 | 48 | 346 | 116 | 18.8 | 116 | 115.42 | 1250 | 92.147 | 92.60764 |
| 158.55 | 7.07 | -0.24 | 18.8 | 16 | 42 | 344 | 126 | 18.8 | 126 | 125.37 | 1252 | 92.365 | 92.82647 |
| 158.68 | 7.12 | -0.24 | 18.8 | 18 | 40 | 348 | 106 | 18.8 | 106 | 105.47 | 1254 | 92.6   | 93.06316 |
| 159.03 | 7.18 | -0.24 | 18.8 | 18 | 34 | 336 | 118 | 18.8 | 118 | 117.41 | 1255 | 92.852 | 93.31605 |
| 159.16 | 7.24 | -0.24 | 18.8 | 12 | 38 | 354 | 140 | 18.8 | 140 | 139.3  | 1257 | 93.116 | 93.5816  |
| 159.47 | 7.3  | -0.24 | 18.9 | 18 | 48 | 382 | 110 | 18.9 | 110 | 109.45 | 1259 | 93.388 | 93.85448 |
| 159.68 | 7.36 | -0.24 | 18.9 | 14 | 30 | 368 | 134 | 18.9 | 134 | 133.33 | 1261 | 93.66  | 94.12791 |
| 159.82 | 7.42 | -0.24 | 18.9 | 12 | 32 | 352 | 146 | 18.9 | 146 | 145.27 | 1263 | 93.925 | 94.39461 |
| 160.21 | 7.48 | -0.24 | 18.9 | 24 | 46 | 350 | 152 | 18.9 | 152 | 151.24 | 1265 | 94.177 | 94.64815 |
| 160.48 | 7.54 | -0.24 | 18.9 | 20 | 36 | 352 | 152 | 18.9 | 152 | 151.24 | 1267 | 94.412 | 94.88438 |
| 160.81 | 7.61 | -0.24 | 19   | 14 | 42 | 378 | 150 | 19   | 150 | 149.25 | 1269 | 94.629 | 95.10239 |
| 161.13 | 7.67 | -0.24 | 19   | 12 | 28 | 346 | 158 | 19   | 158 | 157.21 | 1271 | 94.831 | 95.30479 |
| 161.27 | 7.73 | -0.24 | 19   | 18 | 26 | 354 | 162 | 19   | 162 | 161.19 | 1273 | 95.022 | 95.49705 |
| 161.64 | 7.79 | -0.24 | 19   | 30 | 46 | 372 | 188 | 19   | 188 | 187.06 | 1275 | 95.21  | 95.68606 |
| 161.77 | 7.86 | -0.24 | 19   | 16 | 42 | 346 | 172 | 19   | 172 | 171.14 | 1277 | 95.402 | 95.87859 |
| 161.97 | 7.92 | -0.24 | 19.1 | 16 | 40 | 348 | 170 | 19.1 | 170 | 169.15 | 1279 | 95.602 | 96.07995 |
| 162.3  | 7.98 | -0.24 | 19.1 | 18 | 26 | 344 | 172 | 19.1 | 172 | 171.14 | 1281 | 95.814 | 96.29286 |
| 162.41 | 8.05 | -0.24 | 19.1 | 24 | 30 | 356 | 170 | 19.1 | 170 | 169.15 | 1282 | 96.037 | 96.51728 |
| 162.8  | 8.11 | -0.24 | 19.1 | 24 | 28 | 374 | 152 | 19.1 | 152 | 151.24 | 1284 | 96.269 | 96.75037 |
| 162.96 | 8.18 | -0.24 | 19.1 | 16 | 32 | 346 | 132 | 19.1 | 132 | 131.34 | 1286 | 96.505 | 96.98722 |
| 163.14 | 8.25 | -0.24 | 19.2 | 16 | 34 | 368 | 152 | 19.2 | 152 | 151.24 | 1288 | 96.738 | 97.22154 |
| 163.56 | 8.32 | -0.24 | 19.2 | 12 | 32 | 364 | 140 | 19.2 | 140 | 139.3  | 1290 | 96.962 | 97.44669 |
| 163.8  | 8.38 | -0.24 | 19.2 | 24 | 32 | 328 | 108 | 19.2 | 108 | 107.46 | 1292 | 97.171 | 97.65668 |
| 164.19 | 8.45 | -0.24 | 19.2 | 16 | 36 | 382 | 92  | 19.2 | 92  | 91.542 | 1294 | 97.36  | 97.84697 |
| 164.45 | 8.52 | -0.24 | 19.2 | 22 | 30 | 346 | 116 | 19.2 | 116 | 115.42 | 1296 | 97.527 | 98.01509 |
| 164.65 | 8.59 | -0.24 | 19.3 | 20 | 22 | 362 | 88  | 19.3 | 88  | 87.562 | 1298 | 97.672 | 98.16049 |
| 165.01 | 8.66 | -0.24 | 19.3 | 18 | 26 | 372 | 96  | 19.3 | 96  | 95.522 | 1300 | 97.795 | 98.28428 |
| 165.11 | 8.73 | -0.24 | 19.3 | 20 | 28 | 366 | 84  | 19.3 | 84  | 83.582 | 1302 | 97.899 | 98.38855 |
| 165.37 | 8.8  | -0.24 | 19.3 | 18 | 28 | 368 | 100 | 19.3 | 100 | 99.502 | 1304 | 97.986 | 98.47569 |

|        |      |       |      |    |    |     |     |      |     |        |      |        |          |
|--------|------|-------|------|----|----|-----|-----|------|-----|--------|------|--------|----------|
| 165.67 | 8.87 | -0.24 | 19.3 | 24 | 32 | 344 | 98  | 19.3 | 98  | 97.512 | 1306 | 98.058 | 98.54808 |
| 165.82 | 8.95 | -0.24 | 19.4 | 18 | 32 | 324 | 82  | 19.4 | 82  | 81.592 | 1308 | 98.117 | 98.60795 |
| 166.21 | 9.02 | -0.25 | 19.4 | 16 | 34 | 318 | 84  | 19.4 | 84  | 83.582 | 1309 | 98.167 | 98.65746 |
| 166.34 | 9.09 | -0.25 | 19.4 | 12 | 30 | 356 | 90  | 19.4 | 90  | 89.552 | 1311 | 98.208 | 98.69876 |
| 166.58 | 9.16 | -0.25 | 19.4 | 14 | 26 | 348 | 100 | 19.4 | 100 | 99.502 | 1313 | 98.243 | 98.73402 |
| 166.95 | 9.24 | -0.25 | 19.4 | 14 | 20 | 372 | 94  | 19.4 | 94  | 93.532 | 1315 | 98.274 | 98.76509 |
| 167.21 | 9.31 | -0.25 | 19.5 | 18 | 22 | 322 | 88  | 19.5 | 88  | 87.562 | 1317 | 98.302 | 98.79318 |
| 167.64 | 9.39 | -0.25 | 19.5 | 16 | 24 | 358 | 94  | 19.5 | 94  | 93.532 | 1319 | 98.327 | 98.81872 |
| 167.82 | 9.46 | -0.25 | 19.5 | 18 | 38 | 356 | 86  | 19.5 | 86  | 85.572 | 1321 | 98.35  | 98.8413  |
| 168.08 | 9.54 | -0.25 | 19.5 | 18 | 22 | 340 | 108 | 19.5 | 108 | 107.46 | 1323 | 98.368 | 98.86012 |
| 168.39 | 9.62 | -0.25 | 19.5 | 18 | 26 | 374 | 86  | 19.5 | 86  | 85.572 | 1325 | 98.383 | 98.87449 |
| 168.47 | 9.69 | -0.25 | 19.6 | 18 | 32 | 328 | 74  | 19.6 | 74  | 73.632 | 1327 | 98.392 | 98.8842  |
| 168.83 | 9.77 | -0.25 | 19.6 | 24 | 22 | 372 | 82  | 19.6 | 82  | 81.592 | 1329 | 98.398 | 98.8897  |
| 169.05 | 9.85 | -0.25 | 19.6 | 18 | 28 | 360 | 86  | 19.6 | 86  | 85.572 | 1331 | 98.4   | 98.89199 |
| 169.24 | 9.93 | -0.25 | 19.6 | 20 | 28 | 364 | 90  | 19.6 | 90  | 89.552 | 1333 | 98.401 | 98.89257 |
| 169.61 | 10   | -0.25 | 19.6 | 18 | 24 | 400 | 94  | 19.6 | 94  | 93.532 | 1335 | 98.401 | 98.89292 |
| 169.72 | 10.1 | -0.25 | 19.7 | 16 | 22 | 332 | 104 | 19.7 | 104 | 103.48 | 1336 | 98.402 | 98.89444 |
| 170.02 | 10.2 | -0.25 | 19.7 | 18 | 24 | 362 | 92  | 19.7 | 92  | 91.542 | 1338 | 98.406 | 98.8981  |
| 170.37 | 10.3 | -0.26 | 19.7 | 20 | 28 | 326 | 70  | 19.7 | 70  | 69.652 | 1340 | 98.412 | 98.90431 |
| 170.64 | 10.3 | -0.26 | 19.7 | 18 | 28 | 330 | 74  | 19.7 | 74  | 73.632 | 1342 | 98.421 | 98.91298 |
| 171.05 | 10.4 | -0.26 | 19.7 | 16 | 36 | 356 | 96  | 19.7 | 96  | 95.522 | 1344 | 98.431 | 98.9236  |
| 171.23 | 10.5 | -0.26 | 19.8 | 24 | 34 | 346 | 86  | 19.8 | 86  | 85.572 | 1346 | 98.443 | 98.93551 |
| 171.52 | 10.6 | -0.26 | 19.8 | 10 | 20 | 368 | 100 | 19.8 | 100 | 99.502 | 1348 | 98.456 | 98.94799 |
| 171.79 | 10.7 | -0.26 | 19.8 | 22 | 28 | 348 | 88  | 19.8 | 88  | 87.562 | 1350 | 98.468 | 98.96042 |
| 171.89 | 10.8 | -0.26 | 19.8 | 16 | 30 | 368 | 98  | 19.8 | 98  | 97.512 | 1352 | 98.48  | 98.97227 |
| 172.29 | 10.9 | -0.26 | 19.8 | 14 | 26 | 338 | 94  | 19.8 | 94  | 93.532 | 1354 | 98.491 | 98.98313 |
| 172.45 | 10.9 | -0.26 | 19.9 | 16 | 20 | 376 | 70  | 19.9 | 70  | 69.652 | 1356 | 98.5   | 98.99285 |
| 172.7  | 11   | -0.26 | 19.9 | 22 | 18 | 348 | 82  | 19.9 | 82  | 81.592 | 1358 | 98.509 | 99.00156 |
| 173.04 | 11.1 | -0.26 | 19.9 | 18 | 18 | 306 | 84  | 19.9 | 84  | 83.582 | 1360 | 98.517 | 99.00959 |
| 173.14 | 11.2 | -0.26 | 19.9 | 16 | 24 | 362 | 92  | 19.9 | 92  | 91.542 | 1362 | 98.525 | 99.0173  |
| 173.5  | 11.3 | -0.26 | 19.9 | 18 | 18 | 352 | 104 | 19.9 | 104 | 103.48 | 1363 | 98.532 | 99.02489 |
| 173.8  | 11.4 | -0.26 | 20   | 20 | 18 | 368 | 92  | 20   | 92  | 91.542 | 1365 | 98.539 | 99.03203 |
| 174.1  | 11.5 | -0.26 | 20   | 14 | 24 | 334 | 98  | 20   | 98  | 97.512 | 1367 | 98.545 | 99.03801 |
| 174.47 | 11.6 | -0.26 | 20   | 24 | 16 | 402 | 90  | 20   | 90  | 89.552 | 1369 | 98.549 | 99.04185 |
| 174.66 | 11.7 | -0.26 | 20   | 28 | 20 | 358 | 100 | 20   | 100 | 99.502 | 1371 | 98.55  | 99.0426  |
| 175    | 11.7 | -0.26 | 20   | 22 | 28 | 368 | 70  | 20   | 70  | 69.652 | 1373 | 98.547 | 99.03976 |
| 175.22 | 11.8 | -0.26 | 20.1 | 16 | 18 | 322 | 98  | 20.1 | 98  | 97.512 | 1375 | 98.541 | 99.03329 |
| 175.34 | 11.9 | -0.26 | 20.1 | 22 | 22 | 396 | 96  | 20.1 | 96  | 95.522 | 1377 | 98.531 | 99.02358 |
| 175.72 | 12   | -0.26 | 20.1 | 22 | 24 | 346 | 80  | 20.1 | 80  | 79.602 | 1379 | 98.519 | 99.01122 |
| 175.88 | 12.1 | -0.26 | 20.1 | 14 | 24 | 382 | 88  | 20.1 | 88  | 87.562 | 1381 | 98.504 | 98.99674 |
| 176.18 | 12.2 | -0.26 | 20.1 | 14 | 22 | 370 | 98  | 20.1 | 98  | 97.512 | 1383 | 98.488 | 98.98058 |
| 176.43 | 12.3 | -0.26 | 20.2 | 24 | 20 | 328 | 114 | 20.2 | 114 | 113.43 | 1385 | 98.471 | 98.96305 |
| 176.56 | 12.4 | -0.26 | 20.2 | 12 | 18 | 330 | 74  | 20.2 | 74  | 73.632 | 1387 | 98.452 | 98.9447  |
| 176.95 | 12.5 | -0.26 | 20.2 | 16 | 18 | 362 | 98  | 20.2 | 98  | 97.512 | 1389 | 98.434 | 98.92622 |
| 177.22 | 12.6 | -0.26 | 20.2 | 18 | 28 | 362 | 88  | 20.2 | 88  | 87.562 | 1390 | 98.417 | 98.9087  |
| 177.53 | 12.7 | -0.26 | 20.2 | 22 | 22 | 342 | 100 | 20.2 | 100 | 99.502 | 1392 | 98.401 | 98.89336 |
| 177.89 | 12.8 | -0.26 | 20.3 | 12 | 34 | 324 | 80  | 20.3 | 80  | 79.602 | 1394 | 98.389 | 98.88126 |

|        |      |       |      |    |    |     |     |      |     |        |      |        |          |
|--------|------|-------|------|----|----|-----|-----|------|-----|--------|------|--------|----------|
| 178.04 | 12.9 | -0.26 | 20.3 | 20 | 16 | 366 | 86  | 20.3 | 86  | 85.572 | 1396 | 98.381 | 98.87278 |
| 178.42 | 13   | -0.26 | 20.3 | 14 | 24 | 358 | 94  | 20.3 | 94  | 93.532 | 1398 | 98.376 | 98.86771 |
| 178.59 | 13.1 | -0.27 | 20.3 | 18 | 16 | 350 | 104 | 20.3 | 104 | 103.48 | 1400 | 98.373 | 98.86497 |
| 178.77 | 13.3 | -0.27 | 20.3 | 10 | 34 | 338 | 92  | 20.3 | 92  | 91.542 | 1402 | 98.372 | 98.86337 |
| 179.12 | 13.4 | -0.27 | 20.4 | 12 | 16 | 346 | 88  | 20.4 | 88  | 87.562 | 1404 | 98.37  | 98.86188 |
| 179.26 | 13.5 | -0.27 | 20.4 | 16 | 26 | 340 | 82  | 20.4 | 82  | 81.592 | 1406 | 98.368 | 98.85997 |
| 179.61 | 13.6 | -0.27 | 20.4 | 20 | 18 | 350 | 88  | 20.4 | 88  | 87.562 | 1408 | 98.366 | 98.85741 |
| 179.81 | 13.7 | -0.27 | 20.4 | 10 | 22 | 388 | 86  | 20.4 | 86  | 85.572 | 1410 | 98.362 | 98.85428 |
| 179.97 | 13.8 | -0.27 | 20.4 | 12 | 22 | 334 | 112 | 20.4 | 112 | 111.44 | 1412 | 98.359 | 98.85059 |
| 180.34 | 13.9 | -0.27 | 20.5 | 18 | 24 | 340 | 76  | 20.5 | 76  | 75.622 | 1414 | 98.355 | 98.84635 |
| 180.64 | 14   | -0.27 | 20.5 | 20 | 26 | 370 | 86  | 20.5 | 86  | 85.572 | 1416 | 98.35  | 98.8415  |
| 180.99 | 14.1 | -0.27 | 20.5 | 22 | 18 | 322 | 86  | 20.5 | 86  | 85.572 | 1417 | 98.344 | 98.83603 |
| 181.29 | 14.3 | -0.27 | 20.5 | 16 | 22 | 358 | 92  | 20.5 | 92  | 91.542 | 1419 | 98.338 | 98.8301  |
| 181.46 | 14.4 | -0.27 | 20.5 | 16 | 14 | 364 | 82  | 20.5 | 82  | 81.592 | 1421 | 98.332 | 98.82391 |
| 181.84 | 14.5 | -0.27 | 20.6 | 14 | 20 | 372 | 78  | 20.6 | 78  | 77.612 | 1423 | 98.326 | 98.81761 |
| 181.96 | 14.6 | -0.27 | 20.6 | 18 | 20 | 356 | 92  | 20.6 | 92  | 91.542 | 1425 | 98.32  | 98.81113 |
| 182.21 | 14.7 | -0.27 | 20.6 | 20 | 22 | 332 | 88  | 20.6 | 88  | 87.562 | 1427 | 98.313 | 98.80423 |
| 182.5  | 14.8 | -0.28 | 20.6 | 10 | 18 | 338 | 92  | 20.6 | 92  | 91.542 | 1429 | 98.305 | 98.79664 |
| 182.65 | 15   | -0.28 | 20.6 | 16 | 22 | 316 | 76  | 20.6 | 76  | 75.622 | 1431 | 98.297 | 98.78825 |
| 183.02 | 15.1 | -0.28 | 20.7 | 18 | 24 | 364 | 100 | 20.7 | 100 | 99.502 | 1433 | 98.288 | 98.77939 |
| 183.17 | 15.2 | -0.28 | 20.7 | 16 | 24 | 348 | 86  | 20.7 | 86  | 85.572 | 1435 | 98.279 | 98.77056 |
| 183.37 | 15.3 | -0.28 | 20.7 | 18 | 20 | 370 | 84  | 20.7 | 84  | 83.582 | 1437 | 98.271 | 98.76242 |
| 183.72 | 15.5 | -0.28 | 20.7 | 16 | 26 | 372 | 88  | 20.7 | 88  | 87.562 | 1439 | 98.264 | 98.75518 |
| 183.97 | 15.6 | -0.28 | 20.7 | 18 | 26 | 318 | 84  | 20.7 | 84  | 83.582 | 1441 | 98.257 | 98.74842 |
| 184.39 | 15.7 | -0.28 | 20.8 | 24 | 22 | 336 | 88  | 20.8 | 88  | 87.562 | 1443 | 98.25  | 98.74103 |
| 184.6  | 15.8 | -0.28 | 20.8 | 14 | 26 | 364 | 84  | 20.8 | 84  | 83.582 | 1444 | 98.24  | 98.73159 |
| 184.82 | 16   | -0.28 | 20.8 | 16 | 22 | 356 | 84  | 20.8 | 84  | 83.582 | 1446 | 98.227 | 98.71854 |
| 185.16 | 16.1 | -0.28 | 20.8 | 10 | 22 | 398 | 82  | 20.8 | 82  | 81.592 | 1448 | 98.21  | 98.70074 |
| 185.25 | 16.2 | -0.28 | 20.8 | 16 | 22 | 382 | 88  | 20.8 | 88  | 87.562 | 1450 | 98.187 | 98.67763 |
| 185.54 | 16.4 | -0.28 | 20.9 | 16 | 26 | 338 | 94  | 20.9 | 94  | 93.532 | 1452 | 98.159 | 98.64982 |
| 185.77 | 16.5 | -0.28 | 20.9 | 12 | 12 | 378 | 76  | 20.9 | 76  | 75.622 | 1454 | 98.128 | 98.61906 |
| 185.93 | 16.6 | -0.28 | 20.9 | 12 | 22 | 332 | 106 | 20.9 | 106 | 105.47 | 1456 | 98.098 | 98.58819 |
| 186.28 | 16.8 | -0.28 | 20.9 | 16 | 20 | 304 | 96  | 20.9 | 96  | 95.522 | 1458 | 98.069 | 98.55979 |
| 186.39 | 16.9 | -0.28 | 20.9 | 14 | 18 | 352 | 88  | 20.9 | 88  | 87.562 | 1460 | 98.045 | 98.53502 |
| 186.61 | 17   | -0.28 | 21   | 18 | 18 | 380 | 94  | 21   | 94  | 93.532 | 1462 | 98.023 | 98.51317 |
| 186.93 | 17.2 | -0.28 | 21   | 12 | 16 | 336 | 88  | 21   | 88  | 87.562 | 1464 | 98.002 | 98.49242 |
| 187.19 | 17.3 | -0.28 | 21   | 16 | 18 | 320 | 88  | 21   | 88  | 87.562 | 1466 | 97.981 | 98.47108 |
| 187.58 | 17.4 | -0.28 | 21   | 14 | 22 | 330 | 100 | 21   | 100 | 99.502 | 1468 | 97.959 | 98.44832 |
| 187.74 | 17.6 | -0.28 | 21   | 18 | 18 | 338 | 90  | 21   | 90  | 89.552 | 1470 | 97.935 | 98.42449 |
| 187.99 | 17.7 | -0.29 | 21.1 | 18 | 22 | 366 | 84  | 21.1 | 84  | 83.582 | 1471 | 97.911 | 98.40088 |
| 188.27 | 17.9 | -0.29 | 21.1 | 18 | 20 | 360 | 90  | 21.1 | 90  | 89.552 | 1473 | 97.889 | 98.37893 |
| 188.34 | 18   | -0.29 | 21.1 | 20 | 30 | 356 | 80  | 21.1 | 80  | 79.602 | 1475 | 97.87  | 98.35964 |
| 188.69 | 18.2 | -0.29 | 21.1 | 18 | 24 | 350 | 92  | 21.1 | 92  | 91.542 | 1477 | 97.854 | 98.34296 |
| 188.85 | 18.3 | -0.29 | 21.1 | 18 | 20 | 340 | 88  | 21.1 | 88  | 87.562 | 1479 | 97.839 | 98.32781 |
| 189.04 | 18.5 | -0.29 | 21.2 | 20 | 16 | 376 | 82  | 21.2 | 82  | 81.592 | 1481 | 97.824 | 98.31292 |
| 189.36 | 18.6 | -0.29 | 21.2 | 22 | 18 | 352 | 76  | 21.2 | 76  | 75.622 | 1483 | 97.808 | 98.29711 |
| 189.45 | 18.8 | -0.29 | 21.2 | 16 | 16 | 382 | 96  | 21.2 | 96  | 95.522 | 1485 | 97.791 | 98.27979 |

|        |      |       |      |    |    |     |     |      |     |        |      |        |          |
|--------|------|-------|------|----|----|-----|-----|------|-----|--------|------|--------|----------|
| 189.74 | 18.9 | -0.29 | 21.2 | 20 | 24 | 344 | 80  | 21.2 | 80  | 79.602 | 1487 | 97.772 | 98.26099 |
| 190.03 | 19.1 | -0.29 | 21.2 | 20 | 18 | 318 | 78  | 21.2 | 78  | 77.612 | 1489 | 97.752 | 98.24113 |
| 190.29 | 19.3 | -0.29 | 21.3 | 22 | 30 | 360 | 80  | 21.3 | 80  | 79.602 | 1491 | 97.732 | 98.22091 |
| 190.67 | 19.4 | -0.29 | 21.3 | 18 | 24 | 336 | 104 | 21.3 | 104 | 103.48 | 1493 | 97.712 | 98.20076 |
| 190.83 | 19.6 | -0.29 | 21.3 | 22 | 22 | 352 | 80  | 21.3 | 80  | 79.602 | 1495 | 97.692 | 98.1808  |
| 191.13 | 19.8 | -0.29 | 21.3 | 16 | 26 | 360 | 96  | 21.3 | 96  | 95.522 | 1497 | 97.672 | 98.16062 |
| 191.36 | 19.9 | -0.29 | 21.3 | 26 | 24 | 358 | 84  | 21.3 | 84  | 83.582 | 1498 | 97.651 | 98.13962 |
| 191.45 | 19.8 | -0.29 | 21.4 | 18 | 20 | 346 | 94  | 21.4 | 94  | 93.532 | 1500 | 97.629 | 98.11738 |
| 191.81 | 20.1 | -0.29 | 21.4 | 18 | 20 | 378 | 104 | 21.4 | 104 | 103.48 | 1502 | 97.606 | 98.09386 |
| 191.95 | 20.3 | -0.29 | 21.4 | 20 | 24 | 356 | 80  | 21.4 | 80  | 79.602 | 1504 | 97.582 | 98.06962 |
| 192.18 | 20.4 | -0.29 | 21.4 | 10 | 14 | 324 | 92  | 21.4 | 92  | 91.542 | 1506 | 97.558 | 98.04575 |
| 192.47 | 20.6 | -0.29 | 21.4 | 14 | 22 | 360 | 104 | 21.4 | 104 | 103.48 | 1508 | 97.536 | 98.02345 |
| 192.57 | 20.8 | -0.29 | 21.5 | 18 | 20 | 350 | 100 | 21.5 | 100 | 99.502 | 1510 | 97.516 | 98.00366 |
| 192.91 | 21   | -0.29 | 21.5 | 22 | 26 | 386 | 80  | 21.5 | 80  | 79.602 | 1512 | 97.499 | 97.98669 |
| 193.18 | 21.2 | -0.29 | 21.5 | 16 | 16 | 322 | 94  | 21.5 | 94  | 93.532 | 1514 | 97.485 | 97.97262 |
| 193.47 | 21.3 | -0.29 | 21.5 | 26 | 20 | 372 | 86  | 21.5 | 86  | 85.572 | 1516 | 97.474 | 97.96182 |
| 193.81 | 21.5 | -0.29 | 21.5 | 20 | 28 | 362 | 76  | 21.5 | 76  | 75.622 | 1518 | 97.468 | 97.95531 |
| 193.98 | 21.7 | -0.29 | 21.6 | 10 | 14 | 344 | 86  | 21.6 | 86  | 85.572 | 1520 | 97.467 | 97.9544  |
| 194.3  | 21.9 | -0.29 | 21.6 | 18 | 24 | 392 | 88  | 21.6 | 88  | 87.562 | 1522 | 97.473 | 97.95989 |
| 194.51 | 22.1 | -0.29 | 21.6 | 20 | 24 | 340 | 102 | 21.6 | 102 | 101.49 | 1524 | 97.484 | 97.97107 |
| 194.64 | 22.3 | -0.29 | 21.6 | 16 | 18 | 364 | 90  | 21.6 | 90  | 89.552 | 1525 | 97.498 | 97.98564 |
| 194.97 | 22.5 | -0.29 | 21.6 | 16 | 32 | 350 | 92  | 21.6 | 92  | 91.542 | 1527 | 97.513 | 98.00094 |
| 195.11 | 22.7 | -0.29 | 21.7 | 24 | 18 | 370 | 78  | 21.7 | 78  | 77.612 | 1529 | 97.527 | 98.01503 |
| 195.4  | 22.9 | -0.29 | 21.7 | 16 | 14 | 360 | 72  | 21.7 | 72  | 71.642 | 1531 | 97.54  | 98.02743 |
| 195.64 | 23.1 | -0.29 | 21.7 | 20 | 14 | 368 | 94  | 21.7 | 94  | 93.532 | 1533 | 97.551 | 98.03883 |
| 195.75 | 23.3 | -0.29 | 21.7 | 18 | 20 | 366 | 76  | 21.7 | 76  | 75.622 | 1535 | 97.563 | 98.05042 |
| 196.1  | 23.5 | -0.29 | 21.7 | 14 | 20 | 342 | 88  | 21.7 | 88  | 87.562 | 1537 | 97.575 | 98.06319 |
| 196.37 | 23.7 | -0.29 | 21.8 | 16 | 24 | 364 | 78  | 21.8 | 78  | 77.612 | 1539 | 97.589 | 98.07686 |
| 196.68 | 24   | -0.29 | 21.8 | 22 | 10 | 332 | 70  | 21.8 | 70  | 69.652 | 1541 | 97.602 | 98.08956 |
| 197    | 24.2 | -0.29 | 21.8 | 14 | 16 | 348 | 90  | 21.8 | 90  | 89.552 | 1543 | 97.611 | 98.09871 |
| 197.18 | 24.4 | -0.3  | 21.8 | 20 | 16 | 380 | 84  | 21.8 | 84  | 83.582 | 1545 | 97.615 | 98.10288 |
| 197.54 | 24.6 | -0.3  | 21.8 | 26 | 26 | 344 | 74  | 21.8 | 74  | 73.632 | 1547 | 97.614 | 98.1023  |
| 197.68 | 24.9 | -0.3  | 21.9 | 18 | 18 | 334 | 108 | 21.9 | 108 | 107.46 | 1549 | 97.61  | 98.09832 |
| 197.84 | 25.1 | -0.3  | 21.9 | 22 | 14 | 348 | 100 | 21.9 | 100 | 99.502 | 1551 | 97.604 | 98.09224 |
| 198.16 | 25.3 | -0.3  | 21.9 | 16 | 18 | 380 | 102 | 21.9 | 102 | 101.49 | 1552 | 97.597 | 98.08504 |
| 198.31 | 25.6 | -0.3  | 21.9 | 24 | 22 | 350 | 80  | 21.9 | 80  | 79.602 | 1554 | 97.589 | 98.07718 |
| 198.65 | 25.8 | -0.3  | 21.9 | 14 | 14 | 332 | 80  | 21.9 | 80  | 79.602 | 1556 | 97.581 | 98.06893 |
| 198.82 | 26.1 | -0.3  | 22   | 14 | 22 | 366 | 92  | 22   | 92  | 91.542 | 1558 | 97.572 | 98.06018 |
| 198.99 | 26.3 | -0.3  | 22   | 16 | 18 | 380 | 78  | 22   | 78  | 77.612 | 1560 | 97.563 | 98.05084 |
| 199.31 | 26.6 | -0.3  | 22   | 18 | 16 | 328 | 90  | 22   | 90  | 89.552 | 1562 | 97.553 | 98.04062 |
| 199.58 | 26.8 | -0.3  | 22   | 16 | 30 | 344 | 102 | 22   | 102 | 101.49 | 1564 | 97.541 | 98.02916 |
| 199.96 | 27.1 | -0.3  | 22   | 12 | 18 | 348 | 102 | 22   | 102 | 101.49 | 1566 | 97.528 | 98.01603 |
| 200.21 | 27.4 | -0.3  | 22.1 | 18 | 18 | 310 | 104 | 22.1 | 104 | 103.48 | 1568 | 97.514 | 98.00107 |
| 200.42 | 27.7 | -0.3  | 22.1 | 22 | 24 | 310 | 100 | 22.1 | 100 | 99.502 | 1570 | 97.497 | 97.98447 |
| 200.75 | 27.9 | -0.3  | 22.1 | 24 | 26 | 322 | 84  | 22.1 | 84  | 83.582 | 1572 | 97.48  | 97.96718 |
| 200.9  | 28.2 | -0.3  | 22.1 | 18 | 24 | 344 | 100 | 22.1 | 100 | 99.502 | 1574 | 97.463 | 97.95064 |
| 201.1  | 28.5 | -0.3  | 22.1 | 10 | 18 | 364 | 100 | 22.1 | 100 | 99.502 | 1576 | 97.449 | 97.93638 |

|        |      |       |      |    |    |     |     |      |     |        |      |        |          |
|--------|------|-------|------|----|----|-----|-----|------|-----|--------|------|--------|----------|
| 201.38 | 28.8 | -0.3  | 22.2 | 18 | 20 | 360 | 92  | 22.2 | 92  | 91.542 | 1578 | 97.438 | 97.92511 |
| 201.56 | 29.1 | -0.3  | 22.2 | 24 | 24 | 338 | 108 | 22.2 | 108 | 107.46 | 1579 | 97.429 | 97.91642 |
| 201.91 | 29.4 | -0.3  | 22.2 | 18 | 18 | 322 | 98  | 22.2 | 98  | 97.512 | 1581 | 97.422 | 97.90879 |
| 202.06 | 29.7 | -0.3  | 22.2 | 16 | 26 | 372 | 98  | 22.2 | 98  | 97.512 | 1583 | 97.413 | 97.90027 |
| 202.27 | 30   | -0.31 | 22.2 | 14 | 16 | 392 | 114 | 22.2 | 114 | 113.43 | 1585 | 97.402 | 97.88903 |
| 202.58 | 30.4 | -0.31 | 22.3 | 14 | 18 | 360 | 84  | 22.3 | 84  | 83.582 | 1587 | 97.387 | 97.87399 |
| 202.85 | 30.7 | -0.31 | 22.3 | 10 | 14 | 378 | 86  | 22.3 | 86  | 85.572 | 1589 | 97.368 | 97.855   |
| 203.27 | 31   | -0.31 | 22.3 | 24 | 22 | 378 | 84  | 22.3 | 84  | 83.582 | 1591 | 97.346 | 97.83291 |
| 203.48 | 31.4 | -0.31 | 22.3 | 16 | 26 | 334 | 76  | 22.3 | 76  | 75.622 | 1593 | 97.323 | 97.8093  |
| 203.72 | 31.7 | -0.32 | 22.3 | 22 | 24 | 348 | 74  | 22.3 | 74  | 73.632 | 1595 | 97.299 | 97.78591 |
| 204.03 | 32.1 | -0.32 | 22.4 | 16 | 18 | 340 | 88  | 22.4 | 88  | 87.562 | 1597 | 97.278 | 97.76398 |
| 204.17 | 32.4 | -0.32 | 22.4 | 20 | 28 | 368 | 84  | 22.4 | 84  | 83.582 | 1599 | 97.258 | 97.74416 |
| 204.46 | 32.8 | -0.32 | 22.4 | 20 | 22 | 320 | 90  | 22.4 | 90  | 89.552 | 1601 | 97.24  | 97.72616 |
| 204.68 | 33.2 | -0.32 | 22.4 | 24 | 22 | 354 | 100 | 22.4 | 100 | 99.502 | 1603 | 97.223 | 97.7093  |
| 204.86 | 33.5 | -0.32 | 22.4 | 10 | 14 | 356 | 92  | 22.4 | 92  | 91.542 | 1605 | 97.207 | 97.69269 |
| 205.21 | 33.9 | -0.32 | 22.5 | 16 | 18 | 310 | 78  | 22.5 | 78  | 77.612 | 1606 | 97.19  | 97.67568 |
| 205.36 | 34.3 | -0.33 | 22.5 | 18 | 24 | 356 | 82  | 22.5 | 82  | 81.592 | 1608 | 97.172 | 97.65773 |
| 205.61 | 34.7 | -0.33 | 22.5 | 12 | 24 | 358 | 86  | 22.5 | 86  | 85.572 | 1610 | 97.153 | 97.63843 |
| 205.9  | 35.2 | -0.33 | 22.5 | 12 | 24 | 384 | 86  | 22.5 | 86  | 85.572 | 1612 | 97.132 | 97.61724 |
| 206.22 | 35.6 | -0.33 | 22.5 | 16 | 26 | 390 | 80  | 22.5 | 80  | 79.602 | 1614 | 97.108 | 97.5934  |
| 206.6  | 36   | -0.33 | 22.6 | 18 | 20 | 380 | 104 | 22.6 | 104 | 103.48 | 1616 | 97.081 | 97.56623 |
| 206.78 | 36.5 | -0.33 | 22.6 | 20 | 18 | 370 | 90  | 22.6 | 90  | 89.552 | 1618 | 97.05  | 97.53538 |
| 207.08 | 36.9 | -0.33 | 22.6 | 16 | 26 | 350 | 84  | 22.6 | 84  | 83.582 | 1620 | 97.016 | 97.50115 |
| 207.34 | 37.4 | -0.33 | 22.6 | 28 | 22 | 352 | 100 | 22.6 | 100 | 99.502 | 1622 | 96.98  | 97.46451 |
| 207.49 | 37.9 | -0.33 | 22.6 | 18 | 22 | 364 | 96  | 22.6 | 96  | 95.522 | 1624 | 96.942 | 97.42664 |
| 207.81 | 38.4 | -0.33 | 22.7 | 32 | 20 | 318 | 90  | 22.7 | 90  | 89.552 | 1626 | 96.904 | 97.3884  |
| 207.99 | 38.9 | -0.33 | 22.7 | 14 | 18 | 340 | 86  | 22.7 | 86  | 85.572 | 1628 | 96.866 | 97.35021 |
| 208.21 | 39.4 | -0.33 | 22.7 | 20 | 20 | 390 | 104 | 22.7 | 104 | 103.48 | 1630 | 96.828 | 97.31225 |
| 208.53 | 40   | -0.33 | 22.7 | 16 | 14 | 370 | 68  | 22.7 | 68  | 67.662 | 1632 | 96.791 | 97.27474 |
| 208.67 | 40.5 | -0.33 | 22.7 | 14 | 8  | 366 | 86  | 22.7 | 86  | 85.572 | 1633 | 96.755 | 97.23848 |
| 208.97 | 41.1 | -0.33 | 22.8 | 20 | 12 | 352 | 100 | 22.8 | 100 | 99.502 | 1635 | 96.721 | 97.2045  |
| 209.23 | 41.7 | -0.33 | 22.8 | 10 | 18 | 344 | 76  | 22.8 | 76  | 75.622 | 1637 | 96.69  | 97.17383 |
| 209.54 | 42.3 | -0.34 | 22.8 | 28 | 24 | 344 | 94  | 22.8 | 94  | 93.532 | 1639 | 96.664 | 97.14692 |
| 209.92 | 42.9 | -0.34 | 22.8 | 18 | 20 | 358 | 84  | 22.8 | 84  | 83.582 | 1641 | 96.641 | 97.12372 |
| 210.09 | 43.5 | -0.34 | 22.8 | 12 | 22 | 376 | 86  | 22.8 | 86  | 85.572 | 1643 | 96.621 | 97.10411 |
| 210.43 | 44.2 | -0.34 | 22.9 | 16 | 20 | 342 | 76  | 22.9 | 76  | 75.622 | 1645 | 96.606 | 97.08864 |
| 210.64 | 44.9 | -0.34 | 22.9 | 14 | 12 | 380 | 92  | 22.9 | 92  | 91.542 | 1647 | 96.596 | 97.07897 |
| 210.8  | 45.5 | -0.34 | 22.9 | 18 | 22 | 350 | 98  | 22.9 | 98  | 97.512 | 1649 | 96.595 | 97.07757 |
| 211.13 | 46.2 | -0.34 | 22.9 | 16 | 18 | 388 | 80  | 22.9 | 80  | 79.602 | 1651 | 96.603 | 97.08596 |
| 211.29 | 47   | -0.35 | 22.9 | 22 | 26 | 364 | 82  | 22.9 | 82  | 81.592 | 1653 | 96.62  | 97.10316 |
| 211.55 | 47.7 | -0.35 | 23   | 24 | 18 | 394 | 92  | 23   | 92  | 91.542 | 1655 | 96.642 | 97.12551 |
| 211.84 | 48.4 | -0.35 | 23   | 14 | 18 | 360 | 104 | 23   | 104 | 103.48 | 1657 | 96.666 | 97.14925 |
| 211.98 | 49.2 | -0.35 | 23   | 22 | 26 | 368 | 78  | 23   | 78  | 77.612 | 1659 | 96.689 | 97.17208 |
| 212.33 | 50   | -0.35 | 23   | 16 | 22 | 336 | 70  | 23   | 70  | 69.652 | 1660 | 96.71  | 97.19401 |
| 212.54 | 50.8 | -0.35 | 23   | 12 | 22 | 338 | 92  | 23   | 92  | 91.542 | 1662 | 96.733 | 97.21622 |
| 212.89 | 51.6 | -0.35 | 23.1 | 22 | 24 | 358 | 86  | 23.1 | 86  | 85.572 | 1664 | 96.756 | 97.24016 |
| 213.22 | 52.4 | -0.35 | 23.1 | 18 | 20 | 346 | 90  | 23.1 | 90  | 89.552 | 1666 | 96.783 | 97.26659 |

|        |      |       |      |    |    |     |     |      |     |        |      |        |          |
|--------|------|-------|------|----|----|-----|-----|------|-----|--------|------|--------|----------|
| 213.4  | 53.2 | -0.35 | 23.1 | 16 | 16 | 356 | 80  | 23.1 | 80  | 79.602 | 1668 | 96.811 | 97.29506 |
| 213.78 | 54   | -0.35 | 23.1 | 12 | 26 | 378 | 78  | 23.1 | 78  | 77.612 | 1670 | 96.839 | 97.32362 |
| 213.95 | 54.8 | -0.35 | 23.1 | 24 | 16 | 342 | 80  | 23.1 | 80  | 79.602 | 1672 | 96.866 | 97.35002 |
| 214.13 | 55.5 | -0.35 | 23.2 | 16 | 24 | 344 | 88  | 23.2 | 88  | 87.562 | 1674 | 96.888 | 97.37253 |
| 214.43 | 56.3 | -0.35 | 23.2 | 14 | 18 | 344 | 78  | 23.2 | 78  | 77.612 | 1676 | 96.907 | 97.39119 |
| 214.57 | 57.1 | -0.35 | 23.2 | 16 | 24 | 360 | 88  | 23.2 | 88  | 87.562 | 1678 | 96.923 | 97.40757 |
| 214.93 | 57.9 | -0.35 | 23.2 | 18 | 14 | 354 | 90  | 23.2 | 90  | 89.552 | 1680 | 96.939 | 97.42412 |
| 215.12 | 58.6 | -0.35 | 23.2 | 16 | 28 | 356 | 100 | 23.2 | 100 | 99.502 | 1682 | 96.958 | 97.44268 |
| 215.3  | 59.3 | -0.35 | 23.3 | 22 | 18 | 410 | 100 | 23.3 | 100 | 99.502 | 1684 | 96.979 | 97.46368 |
| 215.62 | 60   | -0.35 | 23.3 | 16 | 24 | 368 | 90  | 23.3 | 90  | 89.552 | 1686 | 97.001 | 97.4859  |
| 215.83 | 60.7 | -0.35 | 23.3 | 22 | 18 | 340 | 92  | 23.3 | 92  | 91.542 | 1687 | 97.022 | 97.50753 |
| 216.24 | 61.3 | -0.36 | 23.3 | 16 | 20 | 362 | 84  | 23.3 | 84  | 83.582 | 1689 | 97.042 | 97.52726 |
| 216.52 | 61.9 | -0.36 | 23.3 | 18 | 14 | 360 | 84  | 23.3 | 84  | 83.582 | 1691 | 97.06  | 97.54516 |
| 216.71 | 62.5 | -0.36 | 23.4 | 18 | 22 | 364 | 70  | 23.4 | 70  | 69.652 | 1693 | 97.077 | 97.56258 |
| 217.08 | 63   | -0.36 | 23.4 | 22 | 22 | 368 | 80  | 23.4 | 80  | 79.602 | 1695 | 97.096 | 97.5815  |
| 217.23 | 63.5 | -0.36 | 23.4 | 14 | 28 | 346 | 88  | 23.4 | 88  | 87.562 | 1697 | 97.118 | 97.60352 |
| 217.43 | 63.9 | -0.36 | 23.4 | 20 | 24 | 360 | 86  | 23.4 | 86  | 85.572 | 1699 | 97.143 | 97.62874 |
| 217.7  | 64.3 | -0.36 | 23.4 | 18 | 24 | 340 | 80  | 23.4 | 80  | 79.602 | 1701 | 97.17  | 97.65541 |
| 217.86 | 64.6 | -0.36 | 23.5 | 14 | 24 | 390 | 78  | 23.5 | 78  | 77.612 | 1703 | 97.195 | 97.68116 |
| 218.22 | 65   | -0.37 | 23.5 | 18 | 20 | 368 | 94  | 23.5 | 94  | 93.532 | 1705 | 97.218 | 97.70453 |
| 218.38 | 65.2 | -0.37 | 23.5 | 18 | 24 | 360 | 106 | 23.5 | 106 | 105.47 | 1707 | 97.24  | 97.7263  |
| 218.59 | 65.4 | -0.37 | 23.5 | 22 | 22 | 352 | 98  | 23.5 | 98  | 97.512 | 1709 | 97.262 | 97.74852 |
| 218.88 | 65.6 | -0.37 | 23.5 | 14 | 12 | 382 | 80  | 23.5 | 80  | 79.602 | 1711 | 97.287 | 97.77366 |
| 219.13 | 65.8 | -0.37 | 23.6 | 20 | 20 | 362 | 88  | 23.6 | 88  | 87.562 | 1713 | 97.317 | 97.80318 |
| 219.55 | 65.9 | -0.37 | 23.6 | 18 | 16 | 312 | 92  | 23.6 | 92  | 91.542 | 1714 | 97.35  | 97.8366  |
| 219.78 | 65.9 | -0.37 | 23.6 | 12 | 26 | 334 | 90  | 23.6 | 90  | 89.552 | 1716 | 97.384 | 97.87112 |
| 220    | 66   | -0.38 | 23.6 | 18 | 22 | 338 | 82  | 23.6 | 82  | 81.592 | 1718 | 97.416 | 97.90264 |
| 220.34 | 66   | -0.38 | 23.6 | 22 | 20 | 376 | 86  | 23.6 | 86  | 85.572 | 1720 | 97.44  | 97.92755 |
| 220.48 | 65.9 | -0.38 | 23.7 | 24 | 24 | 364 | 92  | 23.7 | 92  | 91.542 | 1722 | 97.457 | 97.94453 |
| 220.73 | 65.9 | -0.38 | 23.7 | 22 | 18 | 306 | 88  | 23.7 | 88  | 87.562 | 1724 | 97.467 | 97.95434 |
| 220.95 | 65.8 | -0.38 | 23.7 | 18 | 26 | 342 | 86  | 23.7 | 86  | 85.572 | 1726 | 97.472 | 97.95889 |
| 221.15 | 65.7 | -0.38 | 23.7 | 16 | 18 | 332 | 92  | 23.7 | 92  | 91.542 | 1728 | 97.473 | 97.96009 |
| 221.49 | 65.5 | -0.39 | 23.7 | 12 | 26 | 320 | 94  | 23.7 | 94  | 93.532 | 1730 | 97.472 | 97.95957 |
| 221.64 | 65.3 | -0.39 | 23.8 | 24 | 28 | 362 | 78  | 23.8 | 78  | 77.612 | 1732 | 97.471 | 97.95833 |
| 221.88 | 65.1 | -0.39 | 23.8 | 28 | 18 | 350 | 98  | 23.8 | 98  | 97.512 | 1734 | 97.47  | 97.95737 |
| 222.14 | 64.9 | -0.39 | 23.8 | 10 | 24 | 384 | 84  | 23.8 | 84  | 83.582 | 1736 | 97.47  | 97.95744 |
| 222.4  | 64.7 | -0.39 | 23.8 | 14 | 18 | 390 | 98  | 23.8 | 98  | 97.512 | 1738 | 97.472 | 97.95921 |
| 222.85 | 64.4 | -0.39 | 23.8 | 14 | 10 | 328 | 84  | 23.8 | 84  | 83.582 | 1740 | 97.475 | 97.96261 |
| 223.03 | 64.2 | -0.39 | 23.9 | 22 | 22 | 354 | 94  | 23.9 | 94  | 93.532 | 1741 | 97.479 | 97.96686 |
| 223.31 | 63.9 | -0.39 | 23.9 | 18 | 16 | 380 | 96  | 23.9 | 96  | 95.522 | 1743 | 97.483 | 97.97048 |
| 223.61 | 63.6 | -0.39 | 23.9 | 22 | 18 | 340 | 72  | 23.9 | 72  | 71.642 | 1745 | 97.484 | 97.97189 |
| 223.75 | 63.3 | -0.4  | 23.9 | 18 | 14 | 386 | 80  | 23.9 | 80  | 79.602 | 1747 | 97.483 | 97.97018 |
| 224.04 | 63   | -0.4  | 23.9 | 22 | 14 | 370 | 76  | 23.9 | 76  | 75.622 | 1749 | 97.478 | 97.96586 |
| 224.24 | 62.7 | -0.4  | 24   | 16 | 22 | 376 | 80  | 24   | 80  | 79.602 | 1751 | 97.474 | 97.96093 |
| 224.46 | 62.4 | -0.4  | 24   | 22 | 26 | 356 | 76  | 24   | 76  | 75.622 | 1753 | 97.471 | 97.95811 |
| 224.79 | 62   | -0.4  | 24   | 20 | 18 | 324 | 86  | 24   | 86  | 85.572 | 1755 | 97.472 | 97.95962 |
| 224.96 | 61.7 | -0.4  | 24   | 18 | 24 | 400 | 80  | 24   | 80  | 79.602 | 1757 | 97.479 | 97.96612 |

|        |      |       |      |    |    |     |     |      |     |        |      |        |          |
|--------|------|-------|------|----|----|-----|-----|------|-----|--------|------|--------|----------|
| 225.25 | 61.4 | -0.41 | 24   | 16 | 12 | 342 | 96  | 24   | 96  | 95.522 | 1759 | 97.489 | 97.97657 |
| 225.46 | 61   | -0.41 | 24.1 | 22 | 24 | 380 | 88  | 24.1 | 88  | 87.562 | 1761 | 97.501 | 97.98862 |
| 225.8  | 60.7 | -0.41 | 24.1 | 12 | 20 | 374 | 74  | 24.1 | 74  | 73.632 | 1763 | 97.512 | 97.99951 |
| 226.21 | 60.3 | -0.41 | 24.1 | 22 | 10 | 336 | 68  | 24.1 | 68  | 67.662 | 1765 | 97.519 | 98.00686 |
| 226.39 | 60   | -0.41 | 24.1 | 18 | 22 | 328 | 64  | 24.1 | 64  | 63.682 | 1767 | 97.522 | 98.00967 |
| 226.72 | 59.7 | -0.41 | 24.1 | 12 | 14 | 396 | 90  | 24.1 | 90  | 89.552 | 1768 | 97.521 | 98.00897 |
| 226.97 | 59.3 | -0.42 | 24.2 | 24 | 16 | 370 | 76  | 24.2 | 76  | 75.622 | 1770 | 97.52  | 98.00748 |
| 227.17 | 59   | -0.42 | 24.2 | 18 | 18 | 346 | 88  | 24.2 | 88  | 87.562 | 1772 | 97.521 | 98.00847 |
| 227.48 | 58.7 | -0.42 | 24.2 | 12 | 18 | 352 | 92  | 24.2 | 92  | 91.542 | 1774 | 97.526 | 98.01381 |
| 227.68 | 58.4 | -0.42 | 24.2 | 12 | 14 | 312 | 70  | 24.2 | 70  | 69.652 | 1776 | 97.535 | 98.02288 |
| 227.95 | 58   | -0.42 | 24.2 | 18 | 22 | 336 | 84  | 24.2 | 84  | 83.582 | 1778 | 97.545 | 98.0328  |
| 228.24 | 57.7 | -0.42 | 24.3 | 10 | 16 | 354 | 96  | 24.3 | 96  | 95.522 | 1780 | 97.552 | 98.03984 |
| 228.42 | 57.4 | -0.43 | 24.3 | 24 | 16 | 364 | 92  | 24.3 | 92  | 91.542 | 1782 | 97.553 | 98.04113 |
| 228.75 | 57.1 | -0.43 | 24.3 | 20 | 10 | 346 | 102 | 24.3 | 102 | 101.49 | 1784 | 97.548 | 98.03568 |
| 228.94 | 56.8 | -0.43 | 24.3 | 24 | 22 | 370 | 84  | 24.3 | 84  | 83.582 | 1786 | 97.537 | 98.02467 |
| 229.32 | 56.5 | -0.43 | 24.3 | 16 | 22 | 334 | 84  | 24.3 | 84  | 83.582 | 1788 | 97.523 | 98.01099 |
| 229.69 | 56.2 | -0.43 | 24.4 | 22 | 16 | 368 | 96  | 24.4 | 96  | 95.522 | 1790 | 97.511 | 97.99844 |
| 229.89 | 56   | -0.43 | 24.4 | 18 | 20 | 352 | 76  | 24.4 | 76  | 75.622 | 1792 | 97.503 | 97.99081 |
| 230.27 | 55.7 | -0.44 | 24.4 | 10 | 16 | 336 | 88  | 24.4 | 88  | 87.562 | 1794 | 97.503 | 97.9902  |
| 230.48 | 55.4 | -0.44 | 24.4 | 12 | 12 | 348 | 96  | 24.4 | 96  | 95.522 | 1795 | 97.509 | 97.99646 |
| 230.7  | 55.1 | -0.44 | 24.4 | 18 | 18 | 354 | 80  | 24.4 | 80  | 79.602 | 1797 | 97.519 | 98.00702 |
| 230.99 | 54.9 | -0.44 | 24.5 | 18 | 18 | 346 | 108 | 24.5 | 108 | 107.46 | 1799 | 97.531 | 98.01846 |
| 231.18 | 54.6 | -0.44 | 24.5 | 14 | 20 | 388 | 62  | 24.5 | 62  | 61.692 | 1801 | 97.54  | 98.02791 |
| 231.49 | 54.4 | -0.45 | 24.5 | 16 | 20 | 354 | 82  | 24.5 | 82  | 81.592 | 1803 | 97.546 | 98.03419 |
| 231.74 | 54.2 | -0.45 | 24.5 | 14 | 22 | 368 | 96  | 24.5 | 96  | 95.522 | 1805 | 97.55  | 98.03745 |
| 231.93 | 53.9 | -0.45 | 24.5 | 22 | 12 | 358 | 96  | 24.5 | 96  | 95.522 | 1807 | 97.551 | 98.03868 |
| 232.27 | 53.7 | -0.45 | 24.6 | 20 | 22 | 358 | 70  | 24.6 | 70  | 69.652 | 1809 | 97.551 | 98.03886 |
| 232.43 | 53.5 | -0.45 | 24.6 | 14 | 24 | 354 | 98  | 24.6 | 98  | 97.512 | 1811 | 97.551 | 98.03832 |
| 232.85 | 53.3 | -0.46 | 24.6 | 24 | 22 | 366 | 92  | 24.6 | 92  | 91.542 | 1813 | 97.549 | 98.03655 |
| 233.16 | 53.1 | -0.46 | 24.6 | 22 | 16 | 334 | 74  | 24.6 | 74  | 73.632 | 1815 | 97.545 | 98.03256 |
| 233.37 | 52.9 | -0.46 | 24.6 | 20 | 14 | 374 | 84  | 24.6 | 84  | 83.582 | 1817 | 97.538 | 98.0252  |
| 233.8  | 52.7 | -0.46 | 24.7 | 18 | 24 | 362 | 70  | 24.7 | 70  | 69.652 | 1819 | 97.526 | 98.01381 |
| 233.94 | 52.5 | -0.46 | 24.7 | 16 | 26 | 366 | 68  | 24.7 | 68  | 67.662 | 1821 | 97.511 | 97.99851 |
| 234.19 | 52.4 | -0.47 | 24.7 | 14 | 20 | 350 | 86  | 24.7 | 86  | 85.572 | 1822 | 97.493 | 97.98059 |
| 234.45 | 52.2 | -0.47 | 24.7 | 20 | 28 | 356 | 84  | 24.7 | 84  | 83.582 | 1824 | 97.475 | 97.96235 |
| 234.61 | 52   | -0.47 | 24.7 | 16 | 20 | 366 | 66  | 24.7 | 66  | 65.672 | 1826 | 97.459 | 97.94668 |
| 234.97 | 51.9 | -0.47 | 24.8 | 12 | 20 | 338 | 100 | 24.8 | 100 | 99.502 | 1828 | 97.449 | 97.93612 |
| 235.16 | 51.7 | -0.47 | 24.8 | 22 | 16 | 366 | 84  | 24.8 | 84  | 83.582 | 1830 | 97.445 | 97.9318  |
| 235.37 | 51.6 | -0.48 | 24.8 | 20 | 18 | 360 | 86  | 24.8 | 86  | 85.572 | 1832 | 97.446 | 97.93286 |
| 235.67 | 51.5 | -0.48 | 24.8 | 22 | 18 | 388 | 98  | 24.8 | 98  | 97.512 | 1834 | 97.45  | 97.93693 |
| 235.84 | 51.3 | -0.48 | 24.8 | 18 | 16 | 332 | 88  | 24.8 | 88  | 87.562 | 1836 | 97.454 | 97.9409  |
| 236.3  | 51.2 | -0.48 | 24.9 | 22 | 18 | 358 | 98  | 24.9 | 98  | 97.512 | 1838 | 97.455 | 97.94207 |
| 236.56 | 51.1 | -0.48 | 24.9 | 20 | 16 | 336 | 102 | 24.9 | 102 | 101.49 | 1840 | 97.451 | 97.93859 |
| 236.79 | 51   | -0.48 | 24.9 | 18 | 16 | 360 | 84  | 24.9 | 84  | 83.582 | 1842 | 97.443 | 97.93004 |
| 237.17 | 50.9 | -0.49 | 24.9 | 12 | 26 | 328 | 98  | 24.9 | 98  | 97.512 | 1844 | 97.43  | 97.91739 |
| 237.32 | 50.8 | -0.49 | 24.9 | 24 | 16 | 322 | 86  | 24.9 | 86  | 85.572 | 1846 | 97.416 | 97.90303 |
| 237.6  | 50.7 | -0.49 | 25   | 18 | 24 | 376 | 94  | 25   | 94  | 93.532 | 1848 | 97.403 | 97.88952 |

|        |      |       |      |    |    |     |     |      |     |        |      |        |          |
|--------|------|-------|------|----|----|-----|-----|------|-----|--------|------|--------|----------|
| 237.82 | 50.6 | -0.49 | 25   | 16 | 26 | 392 | 80  | 25   | 80  | 79.602 | 1849 | 97.392 | 97.87871 |
| 238.01 | 50.5 | -0.49 | 25   | 16 | 28 | 342 | 104 | 25   | 104 | 103.48 | 1851 | 97.384 | 97.87095 |
| 238.38 | 50.5 | -0.5  | 25   | 12 | 18 | 376 | 76  | 25   | 76  | 75.622 | 1853 | 97.378 | 97.86516 |
| 238.53 | 50.4 | -0.5  | 25   | 20 | 26 | 342 | 90  | 25   | 90  | 89.552 | 1855 | 97.373 | 97.85953 |
| 238.78 | 50.3 | -0.5  | 25.1 | 20 | 24 | 352 | 76  | 25.1 | 76  | 75.622 | 1857 | 97.366 | 97.8524  |
| 239.02 | 50.3 | -0.5  | 25.1 | 24 | 30 | 322 | 90  | 25.1 | 90  | 89.552 | 1859 | 97.356 | 97.84283 |
| 239.22 | 50.2 | -0.5  | 25.1 | 12 | 16 | 368 | 74  | 25.1 | 74  | 73.632 | 1861 | 97.344 | 97.83118 |
| 239.72 | 50.2 | -0.51 | 25.1 | 14 | 32 | 342 | 96  | 25.1 | 96  | 95.522 | 1863 | 97.332 | 97.81896 |
| 239.96 | 50.1 | -0.51 | 25.1 | 14 | 32 | 346 | 86  | 25.1 | 86  | 85.572 | 1865 | 97.322 | 97.80872 |
| 240.24 | 50.1 | -0.51 | 25.2 | 16 | 36 | 382 | 88  | 25.2 | 88  | 87.562 | 1867 | 97.316 | 97.80282 |
| 240.61 | 50   | -0.51 | 25.2 | 18 | 36 | 344 | 72  | 25.2 | 72  | 71.642 | 1869 | 97.316 | 97.8027  |
| 240.79 | 50   | -0.51 | 25.2 | 22 | 26 | 322 | 82  | 25.2 | 82  | 81.592 | 1871 | 97.321 | 97.80778 |
| 241.14 | 50   | -0.52 | 25.2 | 14 | 34 | 350 | 94  | 25.2 | 94  | 93.532 | 1873 | 97.329 | 97.8159  |
| 241.36 | 50   | -0.52 | 25.2 | 12 | 28 | 336 | 94  | 25.2 | 94  | 93.532 | 1875 | 97.337 | 97.82408 |
| 241.62 | 50   | -0.52 | 25.3 | 20 | 26 | 328 | 94  | 25.3 | 94  | 93.532 | 1876 | 97.343 | 97.82996 |
| 242.01 | 49.9 | -0.52 | 25.3 | 20 | 32 | 332 | 96  | 25.3 | 96  | 95.522 | 1878 | 97.346 | 97.8323  |
| 242.19 | 49.9 | -0.52 | 25.3 | 18 | 34 | 358 | 94  | 25.3 | 94  | 93.532 | 1880 | 97.345 | 97.83129 |
| 242.53 | 49.9 | -0.52 | 25.3 | 22 | 30 | 386 | 94  | 25.3 | 94  | 93.532 | 1882 | 97.342 | 97.82821 |
| 242.77 | 49.9 | -0.53 | 25.3 | 22 | 38 | 342 | 100 | 25.3 | 100 | 99.502 | 1884 | 97.338 | 97.82462 |
| 243.06 | 50   | -0.53 | 25.4 | 16 | 38 | 378 | 88  | 25.4 | 88  | 87.562 | 1886 | 97.335 | 97.82213 |
| 243.57 | 50   | -0.53 | 25.4 | 20 | 32 | 352 | 80  | 25.4 | 80  | 79.602 | 1888 | 97.335 | 97.82159 |
| 243.79 | 50   | -0.53 | 25.4 | 12 | 42 | 344 | 94  | 25.4 | 94  | 93.532 | 1890 | 97.336 | 97.82298 |
| 244.15 | 50   | -0.53 | 25.4 | 24 | 40 | 358 | 110 | 25.4 | 110 | 109.45 | 1892 | 97.339 | 97.82537 |
| 244.47 | 50   | -0.53 | 25.4 | 24 | 50 | 340 | 100 | 25.4 | 100 | 99.502 | 1894 | 97.341 | 97.8273  |
| 244.65 | 50.1 | -0.53 | 25.5 | 14 | 42 | 386 | 96  | 25.5 | 96  | 95.522 | 1896 | 97.341 | 97.82743 |
| 245.03 | 50.1 | -0.53 | 25.5 | 14 | 50 | 346 | 90  | 25.5 | 90  | 89.552 | 1898 | 97.338 | 97.82479 |
| 245.2  | 50.1 | -0.53 | 25.5 | 16 | 28 | 366 | 90  | 25.5 | 90  | 89.552 | 1900 | 97.333 | 97.81923 |
| 245.5  | 50.2 | -0.53 | 25.5 | 14 | 58 | 370 | 78  | 25.5 | 78  | 77.612 | 1902 | 97.324 | 97.81103 |
| 245.82 | 50.2 | -0.54 | 25.5 | 20 | 44 | 336 | 84  | 25.5 | 84  | 83.582 | 1903 | 97.315 | 97.80108 |
| 246    | 50.3 | -0.54 | 25.6 | 28 | 48 | 370 | 96  | 25.6 | 96  | 95.522 | 1905 | 97.304 | 97.7904  |
| 246.36 | 50.3 | -0.54 | 25.6 | 16 | 54 | 360 | 94  | 25.6 | 94  | 93.532 | 1907 | 97.294 | 97.78018 |
| 246.53 | 50.4 | -0.54 | 25.6 | 16 | 46 | 338 | 86  | 25.6 | 86  | 85.572 | 1909 | 97.285 | 97.77129 |
| 246.85 | 50.4 | -0.54 | 25.6 | 22 | 52 | 358 | 98  | 25.6 | 98  | 97.512 | 1911 | 97.278 | 97.76428 |
| 247.3  | 50.5 | -0.54 | 25.6 | 24 | 52 | 346 | 92  | 25.6 | 92  | 91.542 | 1913 | 97.273 | 97.75909 |
| 247.48 | 50.5 | -0.54 | 25.7 | 18 | 54 | 360 | 88  | 25.7 | 88  | 87.562 | 1915 | 97.269 | 97.75533 |
| 247.85 | 50.6 | -0.54 | 25.7 | 18 | 34 | 378 | 94  | 25.7 | 94  | 93.532 | 1917 | 97.266 | 97.75215 |
| 248.08 | 50.7 | -0.55 | 25.7 | 14 | 30 | 358 | 82  | 25.7 | 82  | 81.592 | 1919 | 97.263 | 97.74882 |
| 248.26 | 50.7 | -0.55 | 25.7 | 12 | 40 | 360 | 80  | 25.7 | 80  | 79.602 | 1921 | 97.259 | 97.74488 |
| 248.58 | 50.8 | -0.55 | 25.7 | 24 | 32 | 338 | 74  | 25.7 | 74  | 73.632 | 1923 | 97.254 | 97.7405  |
| 248.71 | 50.9 | -0.55 | 25.8 | 16 | 34 | 346 | 84  | 25.8 | 84  | 83.582 | 1925 | 97.25  | 97.73611 |
| 249.01 | 51   | -0.55 | 25.8 | 24 | 34 | 358 | 96  | 25.8 | 96  | 95.522 | 1927 | 97.246 | 97.73247 |
| 249.25 | 51   | -0.55 | 25.8 | 14 | 24 | 374 | 84  | 25.8 | 84  | 83.582 | 1928 | 97.244 | 97.72978 |
| 249.42 | 51.1 | -0.56 | 25.8 | 16 | 36 | 392 | 74  | 25.8 | 74  | 73.632 | 1930 | 97.242 | 97.72788 |
| 249.76 | 51.2 | -0.56 | 25.8 | 10 | 24 | 372 | 102 | 25.8 | 102 | 101.49 | 1932 | 97.239 | 97.72569 |
| 249.89 | 51.3 | -0.56 | 25.9 | 14 | 34 | 368 | 94  | 25.9 | 94  | 93.532 | 1934 | 97.236 | 97.72175 |
| 250.24 | 51.4 | -0.56 | 25.9 | 14 | 32 | 340 | 96  | 25.9 | 96  | 95.522 | 1936 | 97.228 | 97.71436 |
| 250.61 | 51.4 | -0.56 | 25.9 | 24 | 28 | 350 | 86  | 25.9 | 86  | 85.572 | 1938 | 97.216 | 97.70243 |

|        |      |       |      |    |    |     |     |      |     |        |      |        |          |
|--------|------|-------|------|----|----|-----|-----|------|-----|--------|------|--------|----------|
| 250.79 | 51.5 | -0.56 | 25.9 | 20 | 20 | 362 | 124 | 25.9 | 124 | 123.38 | 1940 | 97.2   | 97.68578 |
| 251.18 | 51.6 | -0.56 | 25.9 | 14 | 20 | 334 | 104 | 25.9 | 104 | 103.48 | 1942 | 97.18  | 97.66566 |
| 251.33 | 51.7 | -0.56 | 26   | 16 | 24 | 342 | 114 | 26   | 114 | 113.43 | 1944 | 97.158 | 97.64409 |
| 251.56 | 51.8 | -0.57 | 26   | 28 | 30 | 372 | 112 | 26   | 112 | 111.44 | 1946 | 97.138 | 97.62384 |
| 251.83 | 51.9 | -0.57 | 26   | 20 | 22 | 414 | 104 | 26   | 104 | 103.48 | 1948 | 97.122 | 97.6073  |
| 251.95 | 52   | -0.57 | 26   | 14 | 30 | 360 | 76  | 26   | 76  | 75.622 | 1950 | 97.11  | 97.59604 |
| 252.31 | 52.1 | -0.57 | 26   | 14 | 26 | 392 | 90  | 26   | 90  | 89.552 | 1952 | 97.105 | 97.59071 |
| 252.51 | 52.1 | -0.57 | 26.1 | 10 | 26 | 368 | 76  | 26.1 | 76  | 75.622 | 1954 | 97.106 | 97.5912  |
| 252.71 | 52.2 | -0.58 | 26.1 | 20 | 32 | 368 | 90  | 26.1 | 90  | 89.552 | 1955 | 97.111 | 97.59677 |
| 253.02 | 52.3 | -0.58 | 26.1 | 20 | 30 | 378 | 74  | 26.1 | 74  | 73.632 | 1957 | 97.121 | 97.60647 |
| 253.15 | 52.4 | -0.58 | 26.1 | 24 | 14 | 362 | 96  | 26.1 | 96  | 95.522 | 1959 | 97.133 | 97.61877 |
| 253.56 | 52.5 | -0.58 | 26.1 | 22 | 22 | 352 | 86  | 26.1 | 86  | 85.572 | 1961 | 97.146 | 97.63157 |
| 253.87 | 52.6 | -0.58 | 26.2 | 18 | 18 | 348 | 88  | 26.2 | 88  | 87.562 | 1963 | 97.156 | 97.64176 |
| 254.07 | 52.7 | -0.59 | 26.2 | 22 | 18 | 372 | 72  | 26.2 | 72  | 71.642 | 1965 | 97.16  | 97.6456  |
| 254.46 | 52.8 | -0.59 | 26.2 | 20 | 32 | 350 | 82  | 26.2 | 82  | 81.592 | 1967 | 97.154 | 97.63931 |
| 254.59 | 52.8 | -0.59 | 26.2 | 22 | 22 | 354 | 94  | 26.2 | 94  | 93.532 | 1969 | 97.135 | 97.62109 |
| 254.88 | 52.9 | -0.59 | 26.2 | 22 | 20 | 348 | 94  | 26.2 | 94  | 93.532 | 1971 | 97.107 | 97.59214 |
| 255.1  | 53   | -0.59 | 26.3 | 22 | 20 | 380 | 94  | 26.3 | 94  | 93.532 | 1973 | 97.072 | 97.55706 |
| 255.26 | 53.1 | -0.59 | 26.3 | 22 | 26 | 328 | 96  | 26.3 | 96  | 95.522 | 1975 | 97.037 | 97.52253 |
| 255.67 | 53.2 | -0.6  | 26.3 | 22 | 24 | 350 | 94  | 26.3 | 94  | 93.532 | 1977 | 97.01  | 97.49532 |
| 255.82 | 53.2 | -0.6  | 26.3 | 20 | 16 | 384 | 94  | 26.3 | 94  | 93.532 | 1979 | 96.995 | 97.47986 |
| 256.06 | 53.3 | -0.6  | 26.3 | 24 | 20 | 358 | 100 | 26.3 | 100 | 99.502 | 1981 | 96.992 | 97.47699 |
| 256.36 | 53.4 | -0.6  | 26.4 | 16 | 24 | 352 | 88  | 26.4 | 88  | 87.562 | 1982 | 96.998 | 97.48336 |
| 256.5  | 53.4 | -0.6  | 26.4 | 16 | 22 | 342 | 80  | 26.4 | 80  | 79.602 | 1984 | 97.009 | 97.49354 |
| 256.98 | 53.5 | -0.6  | 26.4 | 24 | 28 | 346 | 94  | 26.4 | 94  | 93.532 | 1986 | 97.016 | 97.50132 |
| 257.24 | 53.5 | -0.61 | 26.4 | 24 | 22 | 328 | 110 | 26.4 | 110 | 109.45 | 1988 | 97.018 | 97.5028  |
| 257.5  | 53.6 | -0.61 | 26.4 | 10 | 24 | 364 | 100 | 26.4 | 100 | 99.502 | 1990 | 97.012 | 97.49659 |
| 257.87 | 53.6 | -0.61 | 26.5 | 10 | 26 | 380 | 96  | 26.5 | 96  | 95.522 | 1992 | 97     | 97.48504 |
| 258.03 | 53.7 | -0.61 | 26.5 | 14 | 18 | 358 | 90  | 26.5 | 90  | 89.552 | 1994 | 96.988 | 97.47257 |
| 258.37 | 53.7 | -0.61 | 26.5 | 26 | 14 | 372 | 90  | 26.5 | 90  | 89.552 | 1996 | 96.98  | 97.46487 |
| 258.55 | 53.7 | -0.61 | 26.5 | 24 | 26 | 330 | 78  | 26.5 | 78  | 77.612 | 1998 | 96.981 | 97.46636 |
| 258.78 | 53.8 | -0.61 | 26.5 | 12 | 42 | 342 | 84  | 26.5 | 84  | 83.582 | 2000 | 96.994 | 97.47925 |
| 259.17 | 53.8 | -0.61 | 26.6 | 20 | 20 | 374 | 96  | 26.6 | 96  | 95.522 | 2002 | 97.017 | 97.50207 |
| 259.33 | 53.8 | -0.61 | 26.6 | 16 | 30 | 344 | 94  | 26.6 | 94  | 93.532 | 2004 | 97.045 | 97.53066 |
| 259.67 | 53.8 | -0.62 | 26.6 | 22 | 20 | 348 | 86  | 26.6 | 86  | 85.572 | 2006 | 97.073 | 97.5586  |
| 259.9  | 53.8 | -0.62 | 26.6 | 24 | 16 | 364 | 98  | 26.6 | 98  | 97.512 | 2008 | 97.095 | 97.58003 |
| 260.08 | 53.8 | -0.62 | 26.6 | 16 | 24 | 364 | 92  | 26.6 | 92  | 91.542 | 2009 | 97.105 | 97.59067 |
| 260.62 | 53.8 | -0.62 | 26.7 | 20 | 32 | 328 | 88  | 26.7 | 88  | 87.562 | 2011 | 97.104 | 97.58968 |
| 260.85 | 53.8 | -0.62 | 26.7 | 8  | 26 | 366 | 94  | 26.7 | 94  | 93.532 | 2013 | 97.095 | 97.58018 |
| 261.17 | 53.8 | -0.62 | 26.7 | 18 | 20 | 368 | 82  | 26.7 | 82  | 81.592 | 2015 | 97.083 | 97.56818 |
| 261.52 | 53.7 | -0.63 | 26.7 | 36 | 28 | 336 | 80  | 26.7 | 80  | 79.602 | 2017 | 97.074 | 97.55973 |
| 261.71 | 53.7 | -0.63 | 26.7 | 28 | 24 | 342 | 74  | 26.7 | 74  | 73.632 | 2019 | 97.074 | 97.55906 |
| 262.12 | 53.7 | -0.63 | 26.8 | 28 | 24 | 336 | 84  | 26.8 | 84  | 83.582 | 2021 | 97.081 | 97.56667 |
| 262.28 | 53.6 | -0.63 | 26.8 | 12 | 20 | 350 | 96  | 26.8 | 96  | 95.522 | 2023 | 97.095 | 97.57998 |
| 262.55 | 53.5 | -0.63 | 26.8 | 14 | 26 | 368 | 84  | 26.8 | 84  | 83.582 | 2025 | 97.109 | 97.5946  |
| 262.95 | 53.5 | -0.63 | 26.8 | 26 | 20 | 368 | 74  | 26.8 | 74  | 73.632 | 2027 | 97.121 | 97.60632 |
| 263.12 | 53.4 | -0.64 | 26.8 | 22 | 24 | 358 | 102 | 26.8 | 102 | 101.49 | 2029 | 97.127 | 97.61259 |

|        |      |       |      |    |    |     |     |      |     |        |      |        |          |
|--------|------|-------|------|----|----|-----|-----|------|-----|--------|------|--------|----------|
| 263.51 | 53.3 | -0.64 | 26.9 | 20 | 22 | 358 | 94  | 26.9 | 94  | 93.532 | 2031 | 97.128 | 97.61395 |
| 263.73 | 53.2 | -0.64 | 26.9 | 24 | 22 | 356 | 96  | 26.9 | 96  | 95.522 | 2033 | 97.127 | 97.61281 |
| 263.96 | 53.2 | -0.64 | 26.9 | 12 | 22 | 406 | 86  | 26.9 | 86  | 85.572 | 2035 | 97.127 | 97.61222 |
| 264.51 | 53.1 | -0.64 | 26.9 | 24 | 20 | 354 | 124 | 26.9 | 124 | 123.38 | 2036 | 97.128 | 97.61391 |
| 264.72 | 53   | -0.64 | 26.9 | 20 | 30 | 334 | 104 | 26.9 | 104 | 103.48 | 2038 | 97.132 | 97.61795 |
| 265.11 | 52.8 | -0.64 | 27   | 18 | 30 | 346 | 114 | 27   | 114 | 113.43 | 2040 | 97.137 | 97.62227 |
| 265.43 | 52.7 | -0.65 | 27   | 14 | 20 | 354 | 112 | 27   | 112 | 111.44 | 2042 | 97.139 | 97.6244  |
| 265.65 | 52.6 | -0.65 | 27   | 16 | 20 | 334 | 124 | 27   | 124 | 123.38 | 2044 | 97.136 | 97.62209 |
| 266.08 | 52.5 | -0.65 | 27   | 22 | 24 | 352 | 104 | 27   | 104 | 103.48 | 2046 | 97.129 | 97.61469 |
| 266.21 | 52.3 | -0.65 | 27   | 18 | 16 | 366 | 114 | 27   | 114 | 113.43 | 2048 | 97.117 | 97.60255 |
| 266.56 | 52.2 | -0.65 | 27.1 | 20 | 36 | 372 | 112 | 27.1 | 112 | 111.44 | 2050 | 97.101 | 97.58697 |
| 266.9  | 52   | -0.65 | 27.1 | 18 | 32 | 358 | 118 | 27.1 | 118 | 117.41 | 2052 | 97.083 | 97.56881 |
| 267.1  | 51.9 | -0.66 | 27.1 | 18 | 40 | 354 | 112 | 27.1 | 112 | 111.44 | 2054 | 97.064 | 97.54899 |
| 267.51 | 51.7 | -0.66 | 27.1 | 14 | 36 | 342 | 100 | 27.1 | 100 | 99.502 | 2056 | 97.043 | 97.52822 |
| 267.69 | 51.6 | -0.66 | 27.1 | 26 | 20 | 374 | 98  | 27.1 | 98  | 97.512 | 2058 | 97.023 | 97.50778 |
| 267.99 | 51.4 | -0.66 | 27.2 | 18 | 32 | 372 | 108 | 27.2 | 108 | 107.46 | 2060 | 97.004 | 97.48944 |
| 268.49 | 51.2 | -0.66 | 27.2 | 26 | 26 | 332 | 124 | 27.2 | 124 | 123.38 | 2062 | 96.991 | 97.47589 |
| 268.72 | 51   | -0.66 | 27.2 | 24 | 30 | 370 | 120 | 27.2 | 120 | 119.4  | 2063 | 96.984 | 97.46941 |
| 269.16 | 50.8 | -0.66 | 27.2 | 30 | 28 | 386 | 106 | 27.2 | 106 | 105.47 | 2065 | 96.987 | 97.47145 |
| 269.41 | 50.6 | -0.67 | 27.2 | 22 | 30 | 332 | 104 | 27.2 | 104 | 103.48 | 2067 | 96.996 | 97.4813  |
| 269.67 | 50.4 | -0.67 | 27.3 | 24 | 34 | 334 | 112 | 27.3 | 112 | 111.44 | 2069 | 97.011 | 97.49637 |
| 270.07 | 50.2 | -0.67 | 27.3 | 20 | 24 | 350 | 88  | 27.3 | 88  | 87.562 | 2071 | 97.027 | 97.51254 |
| 270.22 | 50   | -0.67 | 27.3 | 26 | 36 | 370 | 110 | 27.3 | 110 | 109.45 | 2073 | 97.04  | 97.52554 |
| 270.6  | 49.8 | -0.67 | 27.3 | 18 | 32 | 376 | 122 | 27.3 | 122 | 121.39 | 2075 | 97.047 | 97.53255 |
| 270.88 | 49.6 | -0.67 | 27.3 | 24 | 28 | 346 | 120 | 27.3 | 120 | 119.4  | 2077 | 97.048 | 97.53306 |
| 271.09 | 49.4 | -0.68 | 27.4 | 32 | 32 | 344 | 106 | 27.4 | 106 | 105.47 | 2079 | 97.044 | 97.5289  |
| 271.51 | 49.2 | -0.68 | 27.4 | 16 | 36 | 344 | 118 | 27.4 | 118 | 117.41 | 2081 | 97.038 | 97.52342 |
| 271.67 | 49   | -0.68 | 27.4 | 18 | 24 | 382 | 108 | 27.4 | 108 | 107.46 | 2083 | 97.035 | 97.51983 |
| 272.01 | 48.8 | -0.68 | 27.4 | 24 | 34 | 344 | 108 | 27.4 | 108 | 107.46 | 2085 | 97.035 | 97.52005 |
| 272.44 | 48.5 | -0.68 | 27.4 | 24 | 36 | 352 | 114 | 27.4 | 114 | 113.43 | 2087 | 97.039 | 97.52375 |
| 272.68 | 48.3 | -0.68 | 27.5 | 16 | 40 | 328 | 108 | 27.5 | 108 | 107.46 | 2089 | 97.044 | 97.52876 |
| 273.13 | 48.1 | -0.68 | 27.5 | 26 | 32 | 372 | 114 | 27.5 | 114 | 113.43 | 2090 | 97.046 | 97.53148 |
| 273.37 | 47.9 | -0.69 | 27.5 | 26 | 34 | 352 | 128 | 27.5 | 128 | 127.36 | 2092 | 97.044 | 97.52889 |
| 273.66 | 47.6 | -0.69 | 27.5 | 26 | 40 | 360 | 110 | 27.5 | 110 | 109.45 | 2094 | 97.034 | 97.51933 |
| 273.98 | 47.4 | -0.69 | 27.5 | 30 | 28 | 354 | 112 | 27.5 | 112 | 111.44 | 2096 | 97.018 | 97.50356 |
| 274.12 | 47.1 | -0.69 | 27.6 | 22 | 34 | 404 | 104 | 27.6 | 104 | 103.48 | 2098 | 96.999 | 97.48413 |
| 274.54 | 46.9 | -0.7  | 27.6 | 28 | 40 | 344 | 122 | 27.6 | 122 | 121.39 | 2100 | 96.98  | 97.46471 |
| 274.76 | 46.7 | -0.7  | 27.6 | 26 | 36 | 336 | 112 | 27.6 | 112 | 111.44 | 2102 | 96.964 | 97.44855 |
| 274.99 | 46.4 | -0.7  | 27.6 | 18 | 42 | 382 | 128 | 27.6 | 128 | 127.36 | 2104 | 96.953 | 97.43747 |
| 275.35 | 46.2 | -0.7  | 27.6 | 36 | 46 | 342 | 160 | 27.6 | 160 | 159.2  | 2106 | 96.947 | 97.43154 |
| 275.49 | 45.9 | -0.7  | 27.7 | 32 | 44 | 350 | 146 | 27.7 | 146 | 145.27 | 2108 | 96.945 | 97.42967 |
| 275.88 | 45.7 | -0.71 | 27.7 | 22 | 46 | 340 | 142 | 27.7 | 142 | 141.29 | 2110 | 96.946 | 97.43029 |
| 276.24 | 45.5 | -0.71 | 27.7 | 36 | 52 | 360 | 132 | 27.7 | 132 | 131.34 | 2112 | 96.948 | 97.43245 |
| 276.47 | 45.2 | -0.71 | 27.7 | 30 | 38 | 348 | 126 | 27.7 | 126 | 125.37 | 2114 | 96.951 | 97.43595 |
| 276.9  | 45   | -0.71 | 27.7 | 30 | 40 | 370 | 154 | 27.7 | 154 | 153.23 | 2116 | 96.957 | 97.44165 |
| 277.08 | 44.7 | -0.71 | 27.8 | 22 | 58 | 380 | 136 | 27.8 | 136 | 135.32 | 2117 | 96.966 | 97.45054 |
| 277.39 | 44.5 | -0.71 | 27.8 | 34 | 40 | 348 | 172 | 27.8 | 172 | 171.14 | 2119 | 96.978 | 97.46335 |

|        |      |       |      |    |     |     |     |      |     |        |      |        |          |
|--------|------|-------|------|----|-----|-----|-----|------|-----|--------|------|--------|----------|
| 277.61 | 44.2 | -0.72 | 27.8 | 22 | 44  | 350 | 142 | 27.8 | 142 | 141.29 | 2121 | 96.995 | 97.48007 |
| 277.75 | 44   | -0.72 | 27.8 | 16 | 38  | 340 | 130 | 27.8 | 130 | 129.35 | 2123 | 97.015 | 97.49988 |
| 278.15 | 43.7 | -0.72 | 27.8 | 24 | 56  | 346 | 164 | 27.8 | 164 | 163.18 | 2125 | 97.036 | 97.52136 |
| 278.26 | 43.5 | -0.72 | 27.9 | 32 | 52  | 356 | 162 | 27.9 | 162 | 161.19 | 2127 | 97.058 | 97.54298 |
| 278.52 | 43.3 | -0.72 | 27.9 | 22 | 50  | 376 | 190 | 27.9 | 190 | 189.05 | 2129 | 97.078 | 97.56328 |
| 278.8  | 43   | -0.73 | 27.9 | 24 | 48  | 380 | 170 | 27.9 | 170 | 169.15 | 2131 | 97.096 | 97.58134 |
| 278.9  | 42.8 | -0.73 | 27.9 | 28 | 56  | 354 | 168 | 27.9 | 168 | 167.16 | 2133 | 97.111 | 97.59645 |
| 279.3  | 42.5 | -0.73 | 27.9 | 20 | 66  | 350 | 188 | 27.9 | 188 | 187.06 | 2135 | 97.123 | 97.60822 |
| 279.56 | 42.3 | -0.73 | 28   | 26 | 44  | 370 | 196 | 28   | 196 | 195.02 | 2137 | 97.131 | 97.61649 |
| 279.82 | 42.1 | -0.73 | 28   | 24 | 50  | 362 | 222 | 28   | 222 | 220.9  | 2139 | 97.136 | 97.62145 |
| 280.15 | 41.8 | -0.74 | 28   | 18 | 50  | 342 | 216 | 28   | 216 | 214.93 | 2141 | 97.138 | 97.62373 |
| 280.28 | 41.6 | -0.74 | 28   | 14 | 68  | 352 | 226 | 28   | 226 | 224.88 | 2143 | 97.139 | 97.62456 |
| 280.6  | 41.3 | -0.74 | 28   | 22 | 58  | 360 | 254 | 28   | 254 | 252.74 | 2144 | 97.14  | 97.62526 |
| 280.72 | 41.1 | -0.74 | 28.1 | 22 | 64  | 370 | 254 | 28.1 | 254 | 252.74 | 2146 | 97.141 | 97.62689 |
| 280.86 | 40.9 | -0.74 | 28.1 | 26 | 76  | 364 | 274 | 28.1 | 274 | 272.64 | 2148 | 97.143 | 97.62915 |
| 281.18 | 40.7 | -0.75 | 28.1 | 16 | 74  | 352 | 312 | 28.1 | 312 | 310.45 | 2150 | 97.145 | 97.63033 |
| 281.29 | 40.4 | -0.75 | 28.1 | 24 | 70  | 366 | 364 | 28.1 | 364 | 362.19 | 2152 | 97.141 | 97.6268  |
| 281.56 | 40.2 | -0.75 | 28.1 | 22 | 90  | 362 | 370 | 28.1 | 370 | 368.16 | 2154 | 97.129 | 97.6144  |
| 281.74 | 40   | -0.75 | 28.2 | 20 | 104 | 352 | 428 | 28.2 | 428 | 425.87 | 2156 | 97.105 | 97.59011 |
| 281.84 | 39.7 | -0.76 | 28.2 | 24 | 84  | 378 | 460 | 28.2 | 460 | 457.71 | 2158 | 97.069 | 97.55423 |
| 282.23 | 39.5 | -0.76 | 28.2 | 28 | 84  | 366 | 494 | 28.2 | 494 | 491.54 | 2160 | 97.026 | 97.51126 |
| 282.44 | 39.3 | -0.76 | 28.2 | 26 | 110 | 364 | 526 | 28.2 | 526 | 523.38 | 2162 | 96.984 | 97.46927 |
| 282.72 | 39.1 | -0.76 | 28.2 | 20 | 110 | 376 | 544 | 28.2 | 544 | 541.29 | 2164 | 96.951 | 97.43609 |
| 282.97 | 38.8 | -0.76 | 28.3 | 16 | 106 | 368 | 644 | 28.3 | 644 | 640.8  | 2166 | 96.933 | 97.41735 |
| 283.09 | 38.6 | -0.76 | 28.3 | 14 | 118 | 344 | 606 | 28.3 | 606 | 602.99 | 2168 | 96.93  | 97.41416 |
| 283.41 | 38.4 | -0.77 | 28.3 | 28 | 132 | 362 | 664 | 28.3 | 664 | 660.7  | 2170 | 96.94  | 97.42484 |
| 283.49 | 38.2 | -0.77 | 28.3 | 22 | 146 | 360 | 610 | 28.3 | 610 | 606.97 | 2171 | 96.96  | 97.44512 |
| 283.66 | 38   | -0.77 | 28.3 | 30 | 148 | 360 | 586 | 28.3 | 586 | 583.08 | 2173 | 96.986 | 97.47071 |
| 283.93 | 37.8 | -0.77 | 28.4 | 28 | 156 | 328 | 614 | 28.4 | 614 | 610.95 | 2175 | 97.012 | 97.49714 |
| 284.03 | 37.5 | -0.77 | 28.4 | 32 | 180 | 340 | 618 | 28.4 | 618 | 614.93 | 2177 | 97.036 | 97.52098 |
| 284.35 | 37.3 | -0.77 | 28.4 | 14 | 198 | 378 | 516 | 28.4 | 516 | 513.43 | 2179 | 97.054 | 97.53908 |
| 284.45 | 37.1 | -0.77 | 28.4 | 26 | 200 | 348 | 516 | 28.4 | 516 | 513.43 | 2181 | 97.064 | 97.54935 |
| 284.6  | 36.9 | -0.77 | 28.4 | 22 | 220 | 352 | 490 | 28.4 | 490 | 487.56 | 2183 | 97.065 | 97.55076 |
| 284.98 | 36.7 | -0.78 | 28.5 | 22 | 248 | 394 | 488 | 28.5 | 488 | 485.57 | 2185 | 97.059 | 97.54419 |
| 285.17 | 36.5 | -0.78 | 28.5 | 36 | 246 | 340 | 426 | 28.5 | 426 | 423.88 | 2187 | 97.047 | 97.53193 |
| 285.49 | 36.3 | -0.78 | 28.5 | 18 | 292 | 348 | 394 | 28.5 | 394 | 392.04 | 2189 | 97.033 | 97.51773 |
| 285.71 | 36.1 | -0.78 | 28.5 | 34 | 312 | 346 | 358 | 28.5 | 358 | 356.22 | 2191 | 97.02  | 97.50523 |
| 285.87 | 35.9 | -0.78 | 28.5 | 24 | 312 | 360 | 354 | 28.5 | 354 | 352.24 | 2193 | 97.012 | 97.49753 |
| 286.19 | 35.7 | -0.78 | 28.6 | 20 | 364 | 366 | 308 | 28.6 | 308 | 306.47 | 2195 | 97.011 | 97.4957  |
| 286.25 | 35.5 | -0.79 | 28.6 | 24 | 358 | 358 | 296 | 28.6 | 296 | 294.53 | 2197 | 97.014 | 97.49881 |
| 286.49 | 35.3 | -0.79 | 28.6 | 18 | 384 | 376 | 296 | 28.6 | 296 | 294.53 | 2198 | 97.019 | 97.504   |
| 286.73 | 35.1 | -0.79 | 28.6 | 26 | 348 | 358 | 234 | 28.6 | 234 | 232.84 | 2200 | 97.023 | 97.50799 |
| 286.86 | 34.9 | -0.79 | 28.6 | 28 | 346 | 336 | 212 | 28.6 | 212 | 210.95 | 2202 | 97.023 | 97.50769 |
| 287.2  | 34.7 | -0.79 | 28.7 | 18 | 358 | 340 | 228 | 28.7 | 228 | 226.87 | 2204 | 97.017 | 97.50178 |
| 287.31 | 34.5 | -0.8  | 28.7 | 18 | 346 | 402 | 202 | 28.7 | 202 | 201    | 2206 | 97.006 | 97.49087 |
| 287.53 | 34.3 | -0.8  | 28.7 | 24 | 336 | 334 | 202 | 28.7 | 202 | 201    | 2208 | 96.992 | 97.47721 |
| 287.86 | 34.1 | -0.8  | 28.7 | 18 | 300 | 364 | 186 | 28.7 | 186 | 185.07 | 2210 | 96.979 | 97.46364 |

|        |      |       |      |    |     |     |     |      |     |        |      |        |          |
|--------|------|-------|------|----|-----|-----|-----|------|-----|--------|------|--------|----------|
| 288.08 | 33.9 | -0.8  | 28.7 | 14 | 288 | 342 | 198 | 28.7 | 198 | 197.01 | 2212 | 96.968 | 97.45269 |
| 288.46 | 33.7 | -0.8  | 28.8 | 20 | 254 | 376 | 188 | 28.8 | 188 | 187.06 | 2214 | 96.961 | 97.44535 |
| 288.63 | 33.5 | -0.81 | 28.8 | 20 | 238 | 362 | 150 | 28.8 | 150 | 149.25 | 2216 | 96.957 | 97.44146 |
| 288.84 | 33.3 | -0.81 | 28.8 | 24 | 254 | 346 | 152 | 28.8 | 152 | 151.24 | 2218 | 96.955 | 97.43952 |
| 289.13 | 33.1 | -0.81 | 28.8 | 26 | 200 | 350 | 186 | 28.8 | 186 | 185.07 | 2220 | 96.953 | 97.43782 |
| 289.21 | 33   | -0.81 | 28.8 | 26 | 178 | 360 | 134 | 28.8 | 134 | 133.33 | 2222 | 96.95  | 97.43484 |
| 289.51 | 32.8 | -0.81 | 28.9 | 16 | 180 | 344 | 142 | 28.9 | 142 | 141.29 | 2224 | 96.946 | 97.43026 |
| 289.71 | 32.6 | -0.82 | 28.9 | 28 | 152 | 356 | 112 | 28.9 | 112 | 111.44 | 2225 | 96.94  | 97.42423 |
| 289.89 | 32.4 | -0.82 | 28.9 | 12 | 182 | 344 | 120 | 28.9 | 120 | 119.4  | 2227 | 96.933 | 97.41764 |
| 290.2  | 32.2 | -0.82 | 28.9 | 20 | 130 | 354 | 116 | 28.9 | 116 | 115.42 | 2229 | 96.927 | 97.41136 |
| 290.34 | 32   | -0.82 | 28.9 | 20 | 146 | 348 | 108 | 28.9 | 108 | 107.46 | 2231 | 96.922 | 97.40633 |
| 290.6  | 31.9 | -0.83 | 29   | 30 | 118 | 342 | 110 | 29   | 110 | 109.45 | 2233 | 96.918 | 97.40304 |
| 290.89 | 31.7 | -0.83 | 29   | 26 | 126 | 398 | 114 | 29   | 114 | 113.43 | 2235 | 96.917 | 97.40203 |
| 291.14 | 31.5 | -0.83 | 29   | 20 | 120 | 330 | 76  | 29   | 76  | 75.622 | 2237 | 96.919 | 97.40367 |
| 291.5  | 31.3 | -0.83 | 29   | 18 | 108 | 366 | 90  | 29   | 90  | 89.552 | 2239 | 96.924 | 97.40836 |
| 291.67 | 31.2 | -0.83 | 29   | 18 | 94  | 372 | 76  | 29   | 76  | 75.622 | 2241 | 96.931 | 97.41613 |
| 291.92 | 31   | -0.84 | 29.1 | 30 | 86  | 354 | 90  | 29.1 | 90  | 89.552 | 2243 | 96.942 | 97.42658 |
| 292.19 | 30.8 | -0.84 | 29.1 | 24 | 96  | 380 | 74  | 29.1 | 74  | 73.632 | 2245 | 96.954 | 97.4386  |
| 292.27 | 30.6 | -0.84 | 29.1 | 22 | 88  | 334 | 96  | 29.1 | 96  | 95.522 | 2247 | 96.966 | 97.4508  |
| 292.62 | 30.5 | -0.84 | 29.1 | 32 | 64  | 348 | 86  | 29.1 | 86  | 85.572 | 2249 | 96.977 | 97.46151 |
| 292.77 | 30.3 | -0.84 | 29.1 | 22 | 66  | 344 | 88  | 29.1 | 88  | 87.562 | 2251 | 96.985 | 97.46967 |
| 293.01 | 30.1 | -0.84 | 29.2 | 16 | 62  | 368 | 72  | 29.2 | 72  | 71.642 | 2252 | 96.99  | 97.47469 |
| 293.3  | 29.9 | -0.84 | 29.2 | 26 | 54  | 356 | 82  | 29.2 | 82  | 81.592 | 2254 | 96.992 | 97.47692 |
| 293.41 | 29.8 | -0.85 | 29.2 | 24 | 48  | 324 | 94  | 29.2 | 94  | 93.532 | 2256 | 96.992 | 97.47706 |
| 293.73 | 29.6 | -0.85 | 29.2 | 26 | 58  | 350 | 94  | 29.2 | 94  | 93.532 | 2258 | 96.991 | 97.47592 |
| 293.98 | 29.4 | -0.85 | 29.2 | 24 | 68  | 356 | 94  | 29.2 | 94  | 93.532 | 2260 | 96.989 | 97.47386 |
| 294.29 | 29.3 | -0.85 | 29.3 | 28 | 52  | 376 | 96  | 29.3 | 96  | 95.522 | 2262 | 96.986 | 97.47069 |
| 294.61 | 29.1 | -0.85 | 29.3 | 22 | 58  | 346 | 94  | 29.3 | 94  | 93.532 | 2264 | 96.981 | 97.46566 |
| 294.79 | 28.9 | -0.86 | 29.3 | 32 | 62  | 340 | 94  | 29.3 | 94  | 93.532 | 2266 | 96.973 | 97.45774 |
| 295.11 | 28.7 | -0.86 | 29.3 | 32 | 60  | 358 | 100 | 29.3 | 100 | 99.502 | 2268 | 96.961 | 97.44611 |
| 295.31 | 28.6 | -0.86 | 29.3 | 26 | 50  | 352 | 88  | 29.3 | 88  | 87.562 | 2270 | 96.946 | 97.43055 |
| 295.46 | 28.4 | -0.86 | 29.4 | 22 | 54  | 388 | 80  | 29.4 | 80  | 79.602 | 2272 | 96.927 | 97.41155 |
| 295.79 | 28.2 | -0.87 | 29.4 | 34 | 40  | 364 | 94  | 29.4 | 94  | 93.532 | 2274 | 96.906 | 97.39035 |
| 295.95 | 28.1 | -0.87 | 29.4 | 28 | 36  | 368 | 110 | 29.4 | 110 | 109.45 | 2276 | 96.884 | 97.36845 |
| 296.24 | 27.9 | -0.87 | 29.4 | 26 | 46  | 340 | 100 | 29.4 | 100 | 99.502 | 2278 | 96.863 | 97.34746 |
| 296.49 | 27.8 | -0.87 | 29.4 | 18 | 52  | 370 | 96  | 29.4 | 96  | 95.522 | 2279 | 96.844 | 97.3286  |
| 296.62 | 27.6 | -0.88 | 29.5 | 24 | 32  | 386 | 90  | 29.5 | 90  | 89.552 | 2281 | 96.828 | 97.31255 |
| 296.96 | 27.4 | -0.88 | 29.5 | 24 | 36  | 356 | 90  | 29.5 | 90  | 89.552 | 2283 | 96.815 | 97.29945 |
| 297.21 | 27.3 | -0.88 | 29.5 | 20 | 38  | 358 | 78  | 29.5 | 78  | 77.612 | 2285 | 96.805 | 97.28915 |
| 297.54 | 27.1 | -0.88 | 29.5 | 24 | 30  | 348 | 84  | 29.5 | 84  | 83.582 | 2287 | 96.797 | 97.28116 |
| 297.85 | 26.9 | -0.88 | 29.5 | 22 | 42  | 370 | 96  | 29.5 | 96  | 95.522 | 2289 | 96.791 | 97.27493 |
| 298.04 | 26.8 | -0.88 | 29.6 | 28 | 36  | 374 | 94  | 29.6 | 94  | 93.532 | 2291 | 96.786 | 97.26983 |
| 298.41 | 26.6 | -0.88 | 29.6 | 32 | 40  | 390 | 86  | 29.6 | 86  | 85.572 | 2293 | 96.781 | 97.2652  |
| 298.57 | 26.5 | -0.88 | 29.6 | 22 | 34  | 362 | 98  | 29.6 | 98  | 97.512 | 2295 | 96.776 | 97.26025 |
| 298.76 | 26.3 | -0.89 | 29.6 | 22 | 36  | 370 | 92  | 29.6 | 92  | 91.542 | 2297 | 96.77  | 97.25426 |
| 299.07 | 26.1 | -0.89 | 29.6 | 24 | 48  | 336 | 88  | 29.6 | 88  | 87.562 | 2299 | 96.763 | 97.24633 |
| 299.23 | 26   | -0.89 | 29.7 | 20 | 26  | 320 | 94  | 29.7 | 94  | 93.532 | 2301 | 96.752 | 97.23589 |

|        |      |       |      |    |    |     |     |      |     |        |      |        |          |
|--------|------|-------|------|----|----|-----|-----|------|-----|--------|------|--------|----------|
| 299.58 | 25.8 | -0.89 | 29.7 | 26 | 42 | 352 | 82  | 29.7 | 82  | 81.592 | 2303 | 96.739 | 97.22225 |
| 299.78 | 25.7 | -0.89 | 29.7 | 34 | 38 | 352 | 80  | 29.7 | 80  | 79.602 | 2305 | 96.721 | 97.20508 |
| 299.95 | 25.5 | -0.89 | 29.7 | 18 | 40 | 374 | 74  | 29.7 | 74  | 73.632 | 2306 | 96.701 | 97.18418 |
| 300.28 | 25.3 | -0.89 | 29.7 | 32 | 28 | 362 | 84  | 29.7 | 84  | 83.582 | 2308 | 96.676 | 97.1597  |
| 300.52 | 25.2 | -0.89 | 29.8 | 24 | 24 | 372 | 96  | 29.8 | 96  | 95.522 | 2310 | 96.649 | 97.13182 |
| 300.91 | 25   | -0.89 | 29.8 | 24 | 40 | 394 | 84  | 29.8 | 84  | 83.582 | 2312 | 96.618 | 97.10105 |
| 301.18 | 24.9 | -0.89 | 29.8 | 28 | 40 | 344 | 74  | 29.8 | 74  | 73.632 | 2314 | 96.585 | 97.06764 |
| 301.39 | 24.7 | -0.9  | 29.8 | 26 | 20 | 362 | 102 | 29.8 | 102 | 101.49 | 2316 | 96.549 | 97.03197 |
| 301.75 | 24.6 | -0.9  | 29.8 | 30 | 32 | 342 | 94  | 29.8 | 94  | 93.532 | 2318 | 96.512 | 96.99419 |
| 301.93 | 24.4 | -0.9  | 29.9 | 28 | 26 | 408 | 96  | 29.9 | 96  | 95.522 | 2320 | 96.472 | 96.95427 |
| 302.16 | 24.2 | -0.9  | 29.9 | 26 | 34 | 406 | 86  | 29.9 | 86  | 85.572 | 2322 | 96.43  | 96.912   |
| 302.42 | 24.1 | -0.9  | 29.9 | 30 | 24 | 390 | 124 | 29.9 | 124 | 123.38 | 2324 | 96.385 | 96.86702 |
| 302.62 | 23.9 | -0.9  | 29.9 | 38 | 30 | 380 | 104 | 29.9 | 104 | 103.48 | 2326 | 96.337 | 96.81901 |
| 302.97 | 23.8 | -0.9  | 29.9 | 28 | 30 | 406 | 114 | 29.9 | 114 | 113.43 | 2328 | 96.287 | 96.76794 |
| 303.13 | 23.6 | -0.9  | 30   | 40 | 34 | 412 | 112 | 30   | 112 | 111.44 | 2330 | 96.233 | 96.71447 |
| 303.37 | 23.5 | -0.9  | 30   | 30 | 26 | 376 | 124 | 30   | 124 | 123.38 | 2332 | 96.18  | 96.66055 |
| 303.65 | 23.3 | -0.9  | 30   | 22 | 40 | 384 | 104 | 30   | 104 | 103.48 | 2333 | 96.129 | 96.60961 |
| 303.91 | 23.2 | -0.91 | 30   | 38 | 26 | 410 | 114 | 30   | 114 | 113.43 | 2335 | 96.086 | 96.56653 |
| 304.36 | 23   | -0.91 | 30   | 44 | 28 | 410 | 112 | 30   | 112 | 111.44 | 2337 | 96.056 | 96.53639 |
| 304.56 | 22.8 | -0.91 | 30.1 | 40 | 32 | 414 | 118 | 30.1 | 118 | 117.41 | 2339 | 96.043 | 96.52309 |
| 304.83 | 22.7 | -0.91 | 30.1 | 44 | 26 | 402 | 112 | 30.1 | 112 | 111.44 | 2341 | 96.047 | 96.52763 |
| 305.16 | 22.5 | -0.91 | 30.1 | 36 | 18 | 356 | 100 | 30.1 | 100 | 99.502 | 2343 | 96.068 | 96.54804 |
| 305.33 | 22.4 | -0.91 | 30.1 | 38 | 26 | 424 | 98  | 30.1 | 98  | 97.512 | 2345 | 96.1   | 96.58051 |
| 305.61 | 22.2 | -0.92 | 30.1 | 60 | 20 | 426 | 108 | 30.1 | 108 | 107.46 | 2347 | 96.14  | 96.62087 |
| 305.83 | 22.1 | -0.92 | 30.2 | 52 | 16 | 382 | 124 | 30.2 | 124 | 123.38 | 2349 | 96.185 | 96.66584 |
| 306.05 | 21.9 | -0.92 | 30.2 | 56 | 16 | 458 | 120 | 30.2 | 120 | 119.4  | 2351 | 96.232 | 96.71364 |
| 306.37 | 21.8 | -0.92 | 30.2 | 76 | 24 | 382 | 106 | 30.2 | 106 | 105.47 | 2353 | 96.282 | 96.76351 |
| 306.54 | 21.6 | -0.92 | 30.2 | 62 | 20 | 430 | 104 | 30.2 | 104 | 103.48 | 2355 | 96.334 | 96.81555 |
| 306.81 | 21.5 | -0.92 | 30.2 | 66 | 24 | 428 | 112 | 30.2 | 112 | 111.44 | 2357 | 96.388 | 96.86968 |
| 307.03 | 21.3 | -0.92 | 30.3 | 74 | 20 | 382 | 88  | 30.3 | 88  | 87.562 | 2359 | 96.443 | 96.9252  |
| 307.33 | 21.2 | -0.92 | 30.3 | 54 | 36 | 390 | 110 | 30.3 | 110 | 109.45 | 2360 | 96.498 | 96.9801  |
| 307.76 | 21   | -0.92 | 30.3 | 54 | 24 | 392 | 122 | 30.3 | 122 | 121.39 | 2362 | 96.549 | 97.03167 |
| 307.95 | 20.9 | -0.92 | 30.3 | 58 | 26 | 366 | 120 | 30.3 | 120 | 119.4  | 2364 | 96.595 | 97.07748 |
| 308.27 | 20.7 | -0.92 | 30.3 | 42 | 18 | 358 | 106 | 30.3 | 106 | 105.47 | 2366 | 96.633 | 97.11656 |
| 308.54 | 20.6 | -0.92 | 30.4 | 44 | 26 | 368 | 118 | 30.4 | 118 | 117.41 | 2368 | 96.666 | 97.14945 |
| 308.71 | 20.4 | -0.93 | 30.4 | 30 | 18 | 398 | 108 | 30.4 | 108 | 107.46 | 2370 | 96.694 | 97.17756 |
| 309.02 | 20.3 | -0.93 | 30.4 | 36 | 26 | 386 | 108 | 30.4 | 108 | 107.46 | 2372 | 96.719 | 97.2022  |
| 309.19 | 20.1 | -0.93 | 30.4 | 34 | 22 | 376 | 114 | 30.4 | 114 | 113.43 | 2374 | 96.741 | 97.22427 |
| 309.44 | 20   | -0.93 | 30.4 | 38 | 22 | 392 | 108 | 30.4 | 108 | 107.46 | 2376 | 96.76  | 97.24399 |
| 309.73 | 19.8 | -0.93 | 30.5 | 38 | 28 | 406 | 114 | 30.5 | 114 | 113.43 | 2378 | 96.777 | 97.26133 |
| 309.9  | 19.7 | -0.93 | 30.5 | 38 | 14 | 388 | 128 | 30.5 | 128 | 127.36 | 2380 | 96.792 | 97.27605 |
| 310.22 | 19.5 | -0.93 | 30.5 | 44 | 26 | 380 | 110 | 30.5 | 110 | 109.45 | 2382 | 96.804 | 97.28808 |
| 310.37 | 19.4 | -0.93 | 30.5 | 32 | 22 | 396 | 112 | 30.5 | 112 | 111.44 | 2384 | 96.813 | 97.29742 |
| 310.73 | 19.2 | -0.93 | 30.5 | 34 | 16 | 370 | 104 | 30.5 | 104 | 103.48 | 2386 | 96.82  | 97.30428 |
| 311.11 | 19.1 | -0.93 | 30.6 | 34 | 20 | 416 | 122 | 30.6 | 122 | 121.39 | 2387 | 96.825 | 97.30903 |
| 311.3  | 18.9 | -0.93 | 30.6 | 46 | 14 | 376 | 112 | 30.6 | 112 | 111.44 | 2389 | 96.828 | 97.31227 |
| 311.67 | 18.8 | -0.93 | 30.6 | 28 | 20 | 342 | 128 | 30.6 | 128 | 127.36 | 2391 | 96.83  | 97.31452 |

|        |      |       |      |     |    |     |     |      |     |        |      |        |          |
|--------|------|-------|------|-----|----|-----|-----|------|-----|--------|------|--------|----------|
| 311.86 | 18.7 | -0.93 | 30.6 | 34  | 18 | 348 | 160 | 30.6 | 160 | 159.2  | 2393 | 96.832 | 97.31634 |
| 312.06 | 18.5 | -0.94 | 30.6 | 36  | 20 | 376 | 146 | 30.6 | 146 | 145.27 | 2395 | 96.834 | 97.31804 |
| 312.38 | 18.4 | -0.94 | 30.7 | 34  | 16 | 354 | 142 | 30.7 | 142 | 141.29 | 2397 | 96.835 | 97.3196  |
| 312.52 | 18.2 | -0.94 | 30.7 | 44  | 22 | 392 | 132 | 30.7 | 132 | 131.34 | 2399 | 96.836 | 97.32061 |
| 312.8  | 18.1 | -0.94 | 30.7 | 32  | 18 | 378 | 126 | 30.7 | 126 | 125.37 | 2401 | 96.836 | 97.3206  |
| 313.05 | 17.9 | -0.94 | 30.7 | 42  | 24 | 370 | 154 | 30.7 | 154 | 153.23 | 2403 | 96.835 | 97.31894 |
| 313.23 | 17.8 | -0.94 | 30.7 | 34  | 22 | 330 | 136 | 30.7 | 136 | 135.32 | 2405 | 96.831 | 97.31542 |
| 313.56 | 17.6 | -0.94 | 30.8 | 48  | 26 | 408 | 172 | 30.8 | 172 | 171.14 | 2407 | 96.826 | 97.31016 |
| 313.69 | 17.5 | -0.94 | 30.8 | 40  | 24 | 330 | 142 | 30.8 | 142 | 141.29 | 2409 | 96.82  | 97.30389 |
| 314.07 | 17.4 | -0.94 | 30.8 | 30  | 20 | 352 | 130 | 30.8 | 130 | 129.35 | 2411 | 96.813 | 97.29752 |
| 314.42 | 17.2 | -0.94 | 30.8 | 38  | 24 | 398 | 164 | 30.8 | 164 | 163.18 | 2413 | 96.808 | 97.29206 |
| 314.6  | 17.1 | -0.94 | 30.8 | 48  | 22 | 374 | 162 | 30.8 | 162 | 161.19 | 2414 | 96.804 | 97.28816 |
| 315.01 | 16.9 | -0.95 | 30.9 | 52  | 12 | 364 | 158 | 30.9 | 158 | 157.21 | 2416 | 96.802 | 97.28604 |
| 315.14 | 16.8 | -0.95 | 30.9 | 38  | 20 | 364 | 148 | 30.9 | 148 | 147.26 | 2418 | 96.801 | 97.28527 |
| 315.4  | 16.7 | -0.95 | 30.9 | 60  | 20 | 342 | 142 | 30.9 | 142 | 141.29 | 2420 | 96.801 | 97.28518 |
| 315.65 | 16.5 | -0.95 | 30.9 | 46  | 24 | 368 | 156 | 30.9 | 156 | 155.22 | 2422 | 96.801 | 97.28483 |
| 315.78 | 16.4 | -0.95 | 30.9 | 44  | 22 | 372 | 152 | 30.9 | 152 | 151.24 | 2424 | 96.8   | 97.28361 |
| 316.15 | 16.2 | -0.95 | 31   | 44  | 22 | 354 | 152 | 31   | 152 | 151.24 | 2426 | 96.797 | 97.28114 |
| 316.34 | 16.1 | -0.95 | 31   | 48  | 20 | 346 | 142 | 31   | 142 | 141.29 | 2428 | 96.794 | 97.27758 |
| 316.54 | 16   | -0.95 | 31   | 50  | 16 | 386 | 160 | 31   | 160 | 159.2  | 2430 | 96.789 | 97.27334 |
| 316.88 | 15.8 | -0.95 | 31   | 58  | 22 | 388 | 164 | 31   | 164 | 163.18 | 2432 | 96.785 | 97.26894 |
| 316.99 | 15.7 | -0.95 | 31   | 60  | 14 | 374 | 142 | 31   | 142 | 141.29 | 2434 | 96.781 | 97.26484 |
| 317.43 | 15.6 | -0.95 | 31.1 | 60  | 24 | 392 | 170 | 31.1 | 170 | 169.15 | 2436 | 96.778 | 97.26139 |
| 317.73 | 15.4 | -0.95 | 31.1 | 76  | 16 | 354 | 144 | 31.1 | 144 | 143.28 | 2438 | 96.775 | 97.25854 |
| 317.93 | 15.3 | -0.95 | 31.1 | 54  | 22 | 360 | 172 | 31.1 | 172 | 171.14 | 2440 | 96.772 | 97.25626 |
| 318.32 | 15.2 | -0.95 | 31.1 | 62  | 20 | 382 | 174 | 31.1 | 174 | 173.13 | 2441 | 96.771 | 97.25442 |
| 318.47 | 15   | -0.96 | 31.1 | 60  | 16 | 348 | 150 | 31.1 | 150 | 149.25 | 2443 | 96.769 | 97.25295 |
| 318.74 | 14.9 | -0.96 | 31.2 | 62  | 20 | 370 | 186 | 31.2 | 186 | 185.07 | 2445 | 96.768 | 97.2518  |
| 318.97 | 14.8 | -0.96 | 31.2 | 74  | 20 | 372 | 176 | 31.2 | 176 | 175.12 | 2447 | 96.767 | 97.25117 |
| 319.13 | 14.6 | -0.96 | 31.2 | 82  | 18 | 348 | 196 | 31.2 | 196 | 195.02 | 2449 | 96.767 | 97.25103 |
| 319.51 | 14.5 | -0.96 | 31.2 | 72  | 20 | 374 | 168 | 31.2 | 168 | 167.16 | 2451 | 96.768 | 97.25136 |
| 319.68 | 14.4 | -0.96 | 31.2 | 80  | 20 | 388 | 194 | 31.2 | 194 | 193.03 | 2453 | 96.768 | 97.252   |
| 319.94 | 14.2 | -0.96 | 31.3 | 96  | 14 | 358 | 192 | 31.3 | 192 | 191.04 | 2455 | 96.769 | 97.2527  |
| 320.23 | 14.1 | -0.96 | 31.3 | 82  | 22 | 368 | 194 | 31.3 | 194 | 193.03 | 2457 | 96.769 | 97.25317 |
| 320.38 | 14   | -0.96 | 31.3 | 110 | 20 | 348 | 188 | 31.3 | 188 | 187.06 | 2459 | 96.769 | 97.25326 |
| 320.86 | 13.8 | -0.96 | 31.3 | 102 | 16 | 348 | 214 | 31.3 | 214 | 212.94 | 2461 | 96.769 | 97.25292 |
| 321.1  | 13.7 | -0.96 | 31.3 | 98  | 18 | 366 | 230 | 31.3 | 230 | 228.86 | 2463 | 96.768 | 97.25229 |
| 321.35 | 13.6 | -0.96 | 31.4 | 106 | 14 | 384 | 236 | 31.4 | 236 | 234.83 | 2465 | 96.768 | 97.25161 |
| 321.72 | 13.5 | -0.97 | 31.4 | 112 | 12 | 372 | 244 | 31.4 | 244 | 242.79 | 2467 | 96.767 | 97.25101 |
| 321.87 | 13.3 | -0.97 | 31.4 | 140 | 16 | 364 | 280 | 31.4 | 280 | 278.61 | 2468 | 96.767 | 97.25045 |
| 322.2  | 13.2 | -0.97 | 31.4 | 148 | 20 | 394 | 268 | 31.4 | 268 | 266.67 | 2470 | 96.766 | 97.24969 |
| 322.37 | 13.1 | -0.97 | 31.4 | 144 | 14 | 376 | 284 | 31.4 | 284 | 282.59 | 2472 | 96.764 | 97.24816 |
| 322.58 | 13   | -0.97 | 31.5 | 198 | 22 | 338 | 342 | 31.5 | 342 | 340.3  | 2474 | 96.761 | 97.24528 |
| 322.96 | 12.9 | -0.97 | 31.5 | 218 | 20 | 350 | 382 | 31.5 | 382 | 380.1  | 2476 | 96.757 | 97.24051 |
| 323.1  | 12.7 | -0.97 | 31.5 | 198 | 30 | 358 | 446 | 31.5 | 446 | 443.78 | 2478 | 96.75  | 97.2337  |
| 323.41 | 12.6 | -0.97 | 31.5 | 266 | 14 | 344 | 436 | 31.5 | 436 | 433.83 | 2480 | 96.741 | 97.22505 |
| 323.64 | 12.5 | -0.97 | 31.5 | 332 | 24 | 342 | 516 | 31.5 | 516 | 513.43 | 2482 | 96.732 | 97.21527 |

|        |      |       |      |      |    |     |      |      |      |        |      |        |          |
|--------|------|-------|------|------|----|-----|------|------|------|--------|------|--------|----------|
| 323.81 | 12.4 | -0.97 | 31.6 | 400  | 20 | 310 | 530  | 31.6 | 530  | 527.36 | 2484 | 96.722 | 97.20537 |
| 324.31 | 12.3 | -0.97 | 31.6 | 408  | 18 | 372 | 648  | 31.6 | 648  | 644.78 | 2486 | 96.713 | 97.19644 |
| 324.52 | 12.1 | -0.98 | 31.6 | 520  | 14 | 346 | 718  | 31.6 | 718  | 714.43 | 2488 | 96.706 | 97.18939 |
| 324.81 | 12   | -0.98 | 31.6 | 574  | 18 | 382 | 742  | 31.6 | 742  | 738.31 | 2490 | 96.701 | 97.18477 |
| 325.13 | 11.9 | -0.98 | 31.6 | 744  | 14 | 346 | 906  | 31.6 | 906  | 901.49 | 2492 | 96.699 | 97.18251 |
| 325.28 | 11.8 | -0.98 | 31.7 | 862  | 24 | 396 | 984  | 31.7 | 984  | 979.1  | 2494 | 96.699 | 97.18224 |
| 325.65 | 11.7 | -0.98 | 31.7 | 1088 | 14 | 360 | 1166 | 31.7 | 1166 | 1160.2 | 2495 | 96.7   | 97.18318 |
| 325.78 | 11.6 | -0.98 | 31.7 | 1222 | 18 | 378 | 1310 | 31.7 | 1310 | 1303.5 | 2497 | 96.701 | 97.18443 |
| 326.01 | 11.5 | -0.98 | 31.7 | 1430 | 14 | 390 | 1450 | 31.7 | 1450 | 1442.8 | 2499 | 96.702 | 97.18512 |
| 326.35 | 11.4 | -0.98 | 31.7 | 1784 | 32 | 374 | 1568 | 31.7 | 1568 | 1560.2 | 2501 | 96.701 | 97.18464 |
| 326.48 | 11.2 | -0.98 | 31.8 | 2234 | 16 | 374 | 1644 | 31.8 | 1644 | 1635.8 | 2503 | 96.699 | 97.18255 |
| 326.84 | 11.1 | -0.99 | 31.8 | 2630 | 18 | 342 | 1736 | 31.8 | 1736 | 1727.4 | 2505 | 96.695 | 97.17882 |
| 327.01 | 11   | -0.99 | 31.8 | 3244 | 24 | 346 | 1890 | 31.8 | 1890 | 1880.6 | 2507 | 96.69  | 97.17357 |
| 327.2  | 10.9 | -0.99 | 31.8 | 3754 | 16 | 356 | 1782 | 31.8 | 1782 | 1773.1 | 2509 | 96.684 | 97.16729 |
| 327.66 | 10.8 | -0.99 | 31.8 | 4198 | 16 | 358 | 1700 | 31.8 | 1700 | 1691.5 | 2511 | 96.677 | 97.16048 |
| 327.86 | 10.7 | -0.99 | 31.9 | 4664 | 24 | 314 | 1610 | 31.9 | 1610 | 1602   | 2513 | 96.67  | 97.1536  |
| 328.21 | 10.6 | -0.99 | 31.9 | 4776 | 22 | 364 | 1414 | 31.9 | 1414 | 1407   | 2515 | 96.664 | 97.14707 |
| 328.46 | 10.5 | -0.99 | 31.9 | 4772 | 18 | 360 | 1366 | 31.9 | 1366 | 1359.2 | 2517 | 96.658 | 97.14104 |
| 328.62 | 10.4 | -0.99 | 31.9 | 4742 | 18 | 386 | 1138 | 31.9 | 1138 | 1132.3 | 2519 | 96.652 | 97.13541 |
| 329    | 10.3 | -0.99 | 31.9 | 4410 | 24 | 370 | 1014 | 31.9 | 1014 | 1009   | 2521 | 96.647 | 97.12996 |
| 329.09 | 10.2 | -0.99 | 32   | 3816 | 18 | 368 | 908  | 32   | 908  | 903.48 | 2522 | 96.641 | 97.12435 |
| 329.37 | 10.1 | -0.99 | 32   | 3384 | 26 | 362 | 816  | 32   | 816  | 811.94 | 2524 | 96.635 | 97.11842 |
| 329.65 | 10   | -0.99 | 32   | 2926 | 16 | 366 | 648  | 32   | 648  | 644.78 | 2526 | 96.629 | 97.11221 |
| 329.82 | 9.91 | -0.99 | 32   | 2376 | 14 | 390 | 590  | 32   | 590  | 587.06 | 2528 | 96.623 | 97.106   |
| 330.19 | 9.81 | -0.99 | 32   | 1920 | 18 | 384 | 504  | 32   | 504  | 501.49 | 2530 | 96.617 | 97.1002  |
| 330.32 | 9.72 | -0.99 | 32.1 | 1478 | 22 | 376 | 458  | 32.1 | 458  | 455.72 | 2532 | 96.612 | 97.0952  |
| 330.56 | 9.62 | -0.99 | 32.1 | 1166 | 16 | 386 | 398  | 32.1 | 398  | 396.02 | 2534 | 96.608 | 97.0912  |
| 330.98 | 9.53 | -0.99 | 32.1 | 978  | 16 | 354 | 380  | 32.1 | 380  | 378.11 | 2536 | 96.605 | 97.08815 |
| 331.18 | 9.44 | -0.99 | 32.1 | 724  | 28 | 372 | 366  | 32.1 | 366  | 364.18 | 2538 | 96.603 | 97.08572 |
| 331.58 | 9.35 | -0.98 | 32.1 | 558  | 12 | 352 | 350  | 32.1 | 350  | 348.26 | 2540 | 96.601 | 97.0835  |
| 331.79 | 9.26 | -0.98 | 32.2 | 522  | 20 | 372 | 310  | 32.2 | 310  | 308.46 | 2542 | 96.598 | 97.08113 |
| 332.01 | 9.17 | -0.98 | 32.2 | 440  | 24 | 390 | 266  | 32.2 | 266  | 264.68 | 2544 | 96.596 | 97.07851 |
| 332.36 | 9.08 | -0.98 | 32.2 | 368  | 14 | 398 | 264  | 32.2 | 264  | 262.69 | 2546 | 96.593 | 97.07558 |
| 332.44 | 9    | -0.98 | 32.2 | 306  | 18 | 408 | 240  | 32.2 | 240  | 238.81 | 2548 | 96.59  | 97.07263 |
| 332.77 | 8.91 | -0.98 | 32.2 | 286  | 16 | 388 | 256  | 32.2 | 256  | 254.73 | 2549 | 96.587 | 97.06975 |
| 333.03 | 8.83 | -0.98 | 32.3 | 252  | 16 | 400 | 228  | 32.3 | 228  | 226.87 | 2551 | 96.584 | 97.06709 |
| 333.22 | 8.74 | -0.98 | 32.3 | 220  | 22 | 370 | 224  | 32.3 | 224  | 222.89 | 2553 | 96.582 | 97.06448 |
| 333.57 | 8.66 | -0.98 | 32.3 | 200  | 18 | 412 | 202  | 32.3 | 202  | 201    | 2555 | 96.579 | 97.06164 |
| 333.7  | 8.58 | -0.98 | 32.3 | 182  | 22 | 412 | 208  | 32.3 | 208  | 206.97 | 2557 | 96.575 | 97.0583  |
| 333.98 | 8.5  | -0.99 | 32.3 | 184  | 26 | 416 | 220  | 32.3 | 220  | 218.91 | 2559 | 96.571 | 97.05432 |
| 334.36 | 8.42 | -0.99 | 32.4 | 170  | 20 | 432 | 182  | 32.4 | 182  | 181.09 | 2561 | 96.567 | 97.04962 |
| 334.6  | 8.34 | -0.99 | 32.4 | 124  | 14 | 478 | 194  | 32.4 | 194  | 193.03 | 2563 | 96.562 | 97.04433 |
| 335.01 | 8.26 | -0.99 | 32.4 | 138  | 24 | 506 | 190  | 32.4 | 190  | 189.05 | 2565 | 96.556 | 97.0386  |
| 335.2  | 8.18 | -0.99 | 32.4 | 118  | 16 | 514 | 174  | 32.4 | 174  | 173.13 | 2567 | 96.55  | 97.03265 |
| 335.47 | 8.1  | -1    | 32.4 | 112  | 18 | 472 | 188  | 32.4 | 188  | 187.06 | 2569 | 96.544 | 97.02663 |
| 335.76 | 8.03 | -1    | 32.5 | 120  | 18 | 582 | 178  | 32.5 | 178  | 177.11 | 2571 | 96.538 | 97.0207  |
| 335.88 | 7.95 | -1    | 32.5 | 112  | 14 | 592 | 182  | 32.5 | 182  | 181.09 | 2573 | 96.532 | 97.01514 |

|        |      |       |      |     |    |     |     |      |     |        |      |        |          |
|--------|------|-------|------|-----|----|-----|-----|------|-----|--------|------|--------|----------|
| 336.27 | 7.88 | -1    | 32.5 | 80  | 14 | 636 | 206 | 32.5 | 206 | 204.98 | 2575 | 96.528 | 97.01024 |
| 336.45 | 7.8  | -1    | 32.5 | 102 | 22 | 648 | 190 | 32.5 | 190 | 189.05 | 2576 | 96.524 | 97.00629 |
| 336.68 | 7.73 | -1    | 32.5 | 88  | 14 | 696 | 204 | 32.5 | 204 | 202.99 | 2578 | 96.521 | 97.00351 |
| 337.01 | 7.66 | -1    | 32.6 | 96  | 16 | 764 | 182 | 32.6 | 182 | 181.09 | 2580 | 96.519 | 97.00186 |
| 337.14 | 7.59 | -1    | 32.6 | 80  | 22 | 750 | 172 | 32.6 | 172 | 171.14 | 2582 | 96.518 | 97.00106 |
| 337.47 | 7.52 | -1    | 32.6 | 84  | 20 | 780 | 180 | 32.6 | 180 | 179.1  | 2584 | 96.518 | 97.00047 |
| 337.81 | 7.46 | -1    | 32.6 | 76  | 14 | 752 | 164 | 32.6 | 164 | 163.18 | 2586 | 96.517 | 96.99951 |
| 338.09 | 7.39 | -1    | 32.6 | 90  | 14 | 724 | 154 | 32.6 | 154 | 153.23 | 2588 | 96.515 | 96.99773 |
| 338.44 | 7.33 | -1    | 32.7 | 96  | 24 | 698 | 168 | 32.7 | 168 | 167.16 | 2590 | 96.512 | 96.99502 |
| 338.65 | 7.26 | -1    | 32.7 | 58  | 14 | 690 | 152 | 32.7 | 152 | 151.24 | 2592 | 96.509 | 96.99169 |
| 338.96 | 7.2  | -1    | 32.7 | 64  | 18 | 636 | 184 | 32.7 | 184 | 183.08 | 2594 | 96.506 | 96.9883  |
| 339.19 | 7.14 | -1    | 32.7 | 68  | 18 | 586 | 136 | 32.7 | 136 | 135.32 | 2596 | 96.503 | 96.98538 |
| 339.35 | 7.07 | -1    | 32.7 | 66  | 16 | 544 | 134 | 32.7 | 134 | 133.33 | 2598 | 96.501 | 96.98331 |
| 339.7  | 7.01 | -1.01 | 32.8 | 68  | 14 | 490 | 148 | 32.8 | 148 | 147.26 | 2600 | 96.499 | 96.98193 |
| 339.87 | 6.95 | -1.01 | 32.8 | 48  | 14 | 452 | 148 | 32.8 | 148 | 147.26 | 2602 | 96.498 | 96.98077 |
| 340.16 | 6.89 | -1.01 | 32.8 | 58  | 14 | 474 | 140 | 32.8 | 140 | 139.3  | 2603 | 96.497 | 96.97916 |
| 340.41 | 6.83 | -1.01 | 32.8 | 56  | 14 | 438 | 138 | 32.8 | 138 | 137.31 | 2605 | 96.494 | 96.97654 |
| 340.56 | 6.77 | -1.01 | 32.8 | 54  | 14 | 408 | 148 | 32.8 | 148 | 147.26 | 2607 | 96.49  | 96.97266 |
| 340.92 | 6.71 | -1.01 | 32.9 | 42  | 12 | 396 | 136 | 32.9 | 136 | 135.32 | 2609 | 96.485 | 96.96774 |
| 341.21 | 6.65 | -1.01 | 32.9 | 56  | 12 | 434 | 140 | 32.9 | 140 | 139.3  | 2611 | 96.48  | 96.96235 |
| 341.52 | 6.59 | -1.01 | 32.9 | 56  | 20 | 378 | 130 | 32.9 | 130 | 129.35 | 2613 | 96.475 | 96.95716 |
| 341.85 | 6.54 | -1.01 | 32.9 | 56  | 24 | 394 | 114 | 32.9 | 114 | 113.43 | 2615 | 96.47  | 96.95276 |
| 342.03 | 6.48 | -1.01 | 32.9 | 48  | 20 | 400 | 144 | 32.9 | 144 | 143.28 | 2617 | 96.467 | 96.94934 |
| 342.38 | 6.42 | -1.01 | 33   | 74  | 14 | 370 | 114 | 33   | 114 | 113.43 | 2619 | 96.465 | 96.94686 |
| 342.57 | 6.37 | -1.01 | 33   | 62  | 16 | 408 | 142 | 33   | 142 | 141.29 | 2621 | 96.463 | 96.9449  |
| 342.75 | 6.31 | -1.01 | 33   | 52  | 12 | 374 | 148 | 33   | 148 | 147.26 | 2623 | 96.461 | 96.94302 |
| 343.07 | 6.26 | -1.01 | 33   | 56  | 16 | 394 | 150 | 33   | 150 | 149.25 | 2625 | 96.459 | 96.94085 |
| 343.22 | 6.21 | -1.01 | 33   | 58  | 20 | 392 | 138 | 33   | 138 | 137.31 | 2627 | 96.456 | 96.9382  |
| 343.55 | 6.15 | -1.01 | 33.1 | 52  | 12 | 364 | 138 | 33.1 | 138 | 137.31 | 2629 | 96.453 | 96.93507 |
| 343.76 | 6.1  | -1.01 | 33.1 | 56  | 16 | 372 | 162 | 33.1 | 162 | 161.19 | 2630 | 96.449 | 96.93164 |
| 343.93 | 6.05 | -1.01 | 33.1 | 50  | 12 | 382 | 152 | 33.1 | 152 | 151.24 | 2632 | 96.446 | 96.92802 |
| 344.28 | 5.99 | -1.01 | 33.1 | 64  | 18 | 378 | 130 | 33.1 | 130 | 129.35 | 2634 | 96.442 | 96.92447 |
| 344.51 | 5.94 | -1.01 | 33.1 | 60  | 18 | 388 | 138 | 33.1 | 138 | 137.31 | 2636 | 96.439 | 96.92105 |
| 344.87 | 5.89 | -1.01 | 33.2 | 36  | 22 | 342 | 140 | 33.2 | 140 | 139.3  | 2638 | 96.436 | 96.91785 |
| 345.14 | 5.84 | -1.01 | 33.2 | 46  | 12 | 436 | 142 | 33.2 | 142 | 141.29 | 2640 | 96.433 | 96.91499 |
| 345.36 | 5.79 | -1.02 | 33.2 | 56  | 20 | 374 | 122 | 33.2 | 122 | 121.39 | 2642 | 96.43  | 96.91248 |
| 345.7  | 5.74 | -1.02 | 33.2 | 38  | 14 | 356 | 120 | 33.2 | 120 | 119.4  | 2644 | 96.428 | 96.91043 |
| 345.86 | 5.7  | -1.02 | 33.2 | 44  | 14 | 372 | 124 | 33.2 | 124 | 123.38 | 2646 | 96.427 | 96.9088  |
| 346.06 | 5.65 | -1.02 | 33.3 | 60  | 20 | 418 | 142 | 33.3 | 142 | 141.29 | 2648 | 96.426 | 96.90764 |
| 346.35 | 5.6  | -1.02 | 33.3 | 46  | 22 | 378 | 168 | 33.3 | 168 | 167.16 | 2650 | 96.425 | 96.90681 |
| 346.5  | 5.55 | -1.02 | 33.3 | 46  | 14 | 398 | 126 | 33.3 | 126 | 125.37 | 2652 | 96.424 | 96.90631 |
| 346.85 | 5.51 | -1.02 | 33.3 | 56  | 18 | 382 | 154 | 33.3 | 154 | 153.23 | 2654 | 96.424 | 96.906   |
| 347.02 | 5.46 | -1.02 | 33.3 | 46  | 12 | 388 | 140 | 33.3 | 140 | 139.3  | 2656 | 96.424 | 96.90593 |
| 347.23 | 5.42 | -1.02 | 33.4 | 50  | 18 | 364 | 132 | 33.4 | 132 | 131.34 | 2657 | 96.424 | 96.90599 |
| 347.52 | 5.37 | -1.02 | 33.4 | 48  | 12 | 376 | 132 | 33.4 | 132 | 131.34 | 2659 | 96.424 | 96.9062  |
| 347.77 | 5.32 | -1.02 | 33.4 | 56  | 14 | 442 | 150 | 33.4 | 150 | 149.25 | 2661 | 96.424 | 96.90643 |
| 348.17 | 5.28 | -1.02 | 33.4 | 54  | 14 | 380 | 136 | 33.4 | 136 | 135.32 | 2663 | 96.424 | 96.90659 |

|        |      |       |      |     |    |     |      |      |      |        |      |        |          |
|--------|------|-------|------|-----|----|-----|------|------|------|--------|------|--------|----------|
| 348.4  | 5.23 | -1.02 | 33.4 | 52  | 14 | 378 | 150  | 33.4 | 150  | 149.25 | 2665 | 96.424 | 96.90648 |
| 348.64 | 5.19 | -1.02 | 33.5 | 46  | 14 | 372 | 126  | 33.5 | 126  | 125.37 | 2667 | 96.424 | 96.90599 |
| 348.93 | 5.14 | -1.02 | 33.5 | 66  | 14 | 378 | 134  | 33.5 | 134  | 133.33 | 2669 | 96.423 | 96.90495 |
| 349.08 | 5.1  | -1.02 | 33.5 | 50  | 14 | 362 | 144  | 33.5 | 144  | 143.28 | 2671 | 96.421 | 96.90337 |
| 349.34 | 5.05 | -1.02 | 33.5 | 76  | 16 | 350 | 140  | 33.5 | 140  | 139.3  | 2673 | 96.419 | 96.90131 |
| 349.56 | 5.01 | -1.02 | 33.5 | 62  | 18 | 376 | 156  | 33.5 | 156  | 155.22 | 2675 | 96.417 | 96.89888 |
| 349.75 | 4.97 | -1.02 | 33.6 | 50  | 18 | 348 | 160  | 33.6 | 160  | 159.2  | 2677 | 96.414 | 96.89613 |
| 350.08 | 4.92 | -1.02 | 33.6 | 56  | 14 | 366 | 166  | 33.6 | 166  | 165.17 | 2679 | 96.411 | 96.89321 |
| 350.23 | 4.88 | -1.02 | 33.6 | 52  | 16 | 362 | 172  | 33.6 | 172  | 171.14 | 2681 | 96.408 | 96.89005 |
| 350.5  | 4.84 | -1.02 | 33.6 | 44  | 18 | 394 | 170  | 33.6 | 170  | 169.15 | 2683 | 96.405 | 96.88661 |
| 350.71 | 4.8  | -1.03 | 33.6 | 42  | 16 | 364 | 160  | 33.6 | 160  | 159.2  | 2684 | 96.401 | 96.88286 |
| 351    | 4.76 | -1.03 | 33.7 | 52  | 16 | 368 | 164  | 33.7 | 164  | 163.18 | 2686 | 96.397 | 96.87882 |
| 351.41 | 4.72 | -1.03 | 33.7 | 50  | 22 | 390 | 172  | 33.7 | 172  | 171.14 | 2688 | 96.393 | 96.87459 |
| 351.59 | 4.68 | -1.03 | 33.7 | 60  | 18 | 416 | 176  | 33.7 | 176  | 175.12 | 2690 | 96.388 | 96.87033 |
| 351.88 | 4.64 | -1.03 | 33.7 | 54  | 16 | 360 | 176  | 33.7 | 176  | 175.12 | 2692 | 96.384 | 96.86614 |
| 352.13 | 4.6  | -1.03 | 33.7 | 60  | 16 | 402 | 164  | 33.7 | 164  | 163.18 | 2694 | 96.38  | 96.86225 |
| 352.28 | 4.56 | -1.03 | 33.8 | 58  | 14 | 356 | 168  | 33.8 | 168  | 167.16 | 2696 | 96.377 | 96.85854 |
| 352.59 | 4.53 | -1.03 | 33.8 | 54  | 12 | 372 | 156  | 33.8 | 156  | 155.22 | 2698 | 96.373 | 96.85496 |
| 352.74 | 4.49 | -1.03 | 33.8 | 68  | 16 | 426 | 178  | 33.8 | 178  | 177.11 | 2700 | 96.369 | 96.85133 |
| 353    | 4.45 | -1.03 | 33.8 | 54  | 20 | 400 | 198  | 33.8 | 198  | 197.01 | 2702 | 96.366 | 96.84741 |
| 353.29 | 4.42 | -1.03 | 33.8 | 48  | 16 | 366 | 230  | 33.8 | 230  | 228.86 | 2704 | 96.361 | 96.84312 |
| 353.46 | 4.38 | -1.03 | 33.9 | 60  | 14 | 372 | 210  | 33.9 | 210  | 208.96 | 2706 | 96.357 | 96.83837 |
| 353.75 | 4.34 | -1.03 | 33.9 | 68  | 16 | 342 | 184  | 33.9 | 184  | 183.08 | 2708 | 96.352 | 96.83327 |
| 353.93 | 4.31 | -1.03 | 33.9 | 58  | 18 | 376 | 214  | 33.9 | 214  | 212.94 | 2710 | 96.346 | 96.82798 |
| 354.26 | 4.28 | -1.03 | 33.9 | 66  | 16 | 370 | 200  | 33.9 | 200  | 199    | 2711 | 96.341 | 96.82274 |
| 354.65 | 4.24 | -1.03 | 33.9 | 70  | 14 | 356 | 212  | 33.9 | 212  | 210.95 | 2713 | 96.336 | 96.81769 |
| 354.81 | 4.21 | -1.03 | 34   | 74  | 22 | 366 | 220  | 34   | 220  | 218.91 | 2715 | 96.331 | 96.81291 |
| 355.16 | 4.17 | -1.03 | 34   | 68  | 18 | 374 | 230  | 34   | 230  | 228.86 | 2717 | 96.327 | 96.8085  |
| 355.38 | 4.14 | -1.03 | 34   | 80  | 18 | 354 | 296  | 34   | 296  | 294.53 | 2719 | 96.323 | 96.80433 |
| 355.56 | 4.11 | -1.03 | 34   | 84  | 14 | 368 | 278  | 34   | 278  | 276.62 | 2721 | 96.319 | 96.80025 |
| 355.87 | 4.07 | -1.03 | 34   | 64  | 16 | 370 | 278  | 34   | 278  | 276.62 | 2723 | 96.315 | 96.79607 |
| 356.01 | 4.04 | -1.03 | 34.1 | 80  | 16 | 392 | 310  | 34.1 | 310  | 308.46 | 2725 | 96.31  | 96.79165 |
| 356.3  | 4.01 | -1.03 | 34.1 | 94  | 16 | 366 | 328  | 34.1 | 328  | 326.37 | 2727 | 96.305 | 96.78693 |
| 356.55 | 3.97 | -1.03 | 34.1 | 118 | 20 | 398 | 316  | 34.1 | 316  | 314.43 | 2729 | 96.3   | 96.78192 |
| 356.71 | 3.94 | -1.03 | 34.1 | 120 | 20 | 372 | 382  | 34.1 | 382  | 380.1  | 2731 | 96.295 | 96.77675 |
| 357.04 | 3.91 | -1.03 | 34.1 | 126 | 18 | 372 | 410  | 34.1 | 410  | 407.96 | 2733 | 96.29  | 96.77158 |
| 357.19 | 3.87 | -1.03 | 34.2 | 152 | 16 | 406 | 416  | 34.2 | 416  | 413.93 | 2735 | 96.285 | 96.76656 |
| 357.56 | 3.84 | -1.03 | 34.2 | 170 | 22 | 408 | 474  | 34.2 | 474  | 471.64 | 2737 | 96.28  | 96.7618  |
| 357.9  | 3.81 | -1.03 | 34.2 | 228 | 20 | 380 | 538  | 34.2 | 538  | 535.32 | 2738 | 96.276 | 96.75722 |
| 358.08 | 3.78 | -1.03 | 34.2 | 246 | 14 | 370 | 490  | 34.2 | 490  | 487.56 | 2740 | 96.271 | 96.75272 |
| 358.47 | 3.74 | -1.02 | 34.2 | 278 | 22 | 376 | 578  | 34.2 | 578  | 575.12 | 2742 | 96.267 | 96.74808 |
| 358.63 | 3.71 | -1.02 | 34.3 | 334 | 18 | 386 | 706  | 34.3 | 706  | 702.49 | 2744 | 96.262 | 96.74316 |
| 358.87 | 3.68 | -1.02 | 34.3 | 374 | 26 | 410 | 732  | 34.3 | 732  | 728.36 | 2746 | 96.257 | 96.7378  |
| 359.13 | 3.65 | -1.02 | 34.3 | 454 | 20 | 428 | 852  | 34.3 | 852  | 847.76 | 2748 | 96.251 | 96.73207 |
| 359.27 | 3.62 | -1.02 | 34.3 | 564 | 18 | 388 | 892  | 34.3 | 892  | 887.56 | 2750 | 96.245 | 96.72607 |
| 359.62 | 3.59 | -1.02 | 34.3 | 646 | 26 | 376 | 988  | 34.3 | 988  | 983.08 | 2752 | 96.239 | 96.72001 |
| 359.8  | 3.56 | -1.02 | 34.4 | 776 | 20 | 418 | 1142 | 34.4 | 1142 | 1136.3 | 2754 | 96.233 | 96.71408 |

|        |      |       |      |      |    |      |      |      |      |        |      |        |          |
|--------|------|-------|------|------|----|------|------|------|------|--------|------|--------|----------|
| 360.01 | 3.53 | -1.02 | 34.4 | 970  | 20 | 434  | 1194 | 34.4 | 1194 | 1188.1 | 2756 | 96.227 | 96.70839 |
| 360.34 | 3.5  | -1.02 | 34.4 | 1228 | 22 | 412  | 1316 | 34.4 | 1316 | 1309.5 | 2758 | 96.222 | 96.70293 |
| 360.46 | 3.47 | -1.02 | 34.4 | 1488 | 10 | 430  | 1284 | 34.4 | 1284 | 1277.6 | 2760 | 96.217 | 96.69768 |
| 360.87 | 3.44 | -1.02 | 34.4 | 1898 | 18 | 400  | 1400 | 34.4 | 1400 | 1393   | 2762 | 96.211 | 96.69246 |
| 361.17 | 3.41 | -1.02 | 34.5 | 2382 | 30 | 412  | 1450 | 34.5 | 1450 | 1442.8 | 2764 | 96.206 | 96.68711 |
| 361.38 | 3.39 | -1.02 | 34.5 | 3034 | 14 | 410  | 1438 | 34.5 | 1438 | 1430.8 | 2765 | 96.201 | 96.68152 |
| 361.76 | 3.36 | -1.02 | 34.5 | 3498 | 22 | 410  | 1426 | 34.5 | 1426 | 1418.9 | 2767 | 96.195 | 96.67566 |
| 361.91 | 3.33 | -1.02 | 34.5 | 4000 | 12 | 374  | 1270 | 34.5 | 1270 | 1263.7 | 2769 | 96.189 | 96.66952 |
| 362.19 | 3.31 | -1.02 | 34.5 | 4246 | 16 | 424  | 1222 | 34.5 | 1222 | 1215.9 | 2771 | 96.182 | 96.66324 |
| 362.39 | 3.28 | -1.02 | 34.6 | 4054 | 22 | 428  | 1170 | 34.6 | 1170 | 1164.2 | 2773 | 96.176 | 96.65693 |
| 362.56 | 3.25 | -1.02 | 34.6 | 3888 | 26 | 390  | 1108 | 34.6 | 1108 | 1102.5 | 2775 | 96.17  | 96.65076 |
| 362.92 | 3.22 | -1.02 | 34.6 | 3566 | 12 | 426  | 962  | 34.6 | 962  | 957.21 | 2777 | 96.164 | 96.64491 |
| 363.08 | 3.2  | -1.02 | 34.6 | 3050 | 20 | 432  | 944  | 34.6 | 944  | 939.3  | 2779 | 96.159 | 96.63952 |
| 363.32 | 3.17 | -1.02 | 34.6 | 2658 | 18 | 414  | 824  | 34.6 | 824  | 819.9  | 2781 | 96.154 | 96.63469 |
| 363.6  | 3.14 | -1.02 | 34.7 | 2220 | 22 | 450  | 694  | 34.7 | 694  | 690.55 | 2783 | 96.15  | 96.63035 |
| 363.72 | 3.12 | -1.02 | 34.7 | 1652 | 16 | 380  | 610  | 34.7 | 610  | 606.97 | 2785 | 96.146 | 96.62632 |
| 364.17 | 3.09 | -1.02 | 34.7 | 1304 | 20 | 418  | 600  | 34.7 | 600  | 597.01 | 2787 | 96.142 | 96.62236 |
| 364.42 | 3.06 | -1.02 | 34.7 | 984  | 18 | 432  | 522  | 34.7 | 522  | 519.4  | 2789 | 96.137 | 96.61816 |
| 364.68 | 3.04 | -1.02 | 34.7 | 760  | 22 | 430  | 520  | 34.7 | 520  | 517.41 | 2791 | 96.133 | 96.61357 |
| 365.03 | 3.01 | -1.02 | 34.8 | 546  | 22 | 448  | 474  | 34.8 | 474  | 471.64 | 2792 | 96.128 | 96.60837 |
| 365.18 | 2.98 | -1.03 | 34.8 | 440  | 14 | 420  | 422  | 34.8 | 422  | 419.9  | 2794 | 96.122 | 96.60271 |
| 365.49 | 2.96 | -1.03 | 34.8 | 388  | 16 | 404  | 394  | 34.8 | 394  | 392.04 | 2796 | 96.116 | 96.59677 |
| 365.65 | 2.93 | -1.03 | 34.8 | 348  | 18 | 436  | 414  | 34.8 | 414  | 411.94 | 2798 | 96.11  | 96.59075 |
| 365.84 | 2.91 | -1.03 | 34.8 | 302  | 18 | 440  | 368  | 34.8 | 368  | 366.17 | 2800 | 96.104 | 96.58487 |
| 366.21 | 2.88 | -1.03 | 34.9 | 244  | 16 | 428  | 374  | 34.9 | 374  | 372.14 | 2802 | 96.099 | 96.57918 |
| 366.34 | 2.86 | -1.03 | 34.9 | 228  | 18 | 450  | 326  | 34.9 | 326  | 324.38 | 2804 | 96.093 | 96.57368 |
| 366.63 | 2.83 | -1.03 | 34.9 | 162  | 20 | 428  | 348  | 34.9 | 348  | 346.27 | 2806 | 96.088 | 96.56816 |
| 366.85 | 2.81 | -1.03 | 34.9 | 168  | 16 | 402  | 346  | 34.9 | 346  | 344.28 | 2808 | 96.082 | 96.56246 |
| 367    | 2.79 | -1.03 | 34.9 | 144  | 10 | 456  | 324  | 34.9 | 324  | 322.39 | 2810 | 96.076 | 96.55651 |
| 367.46 | 2.76 | -1.03 | 35   | 142  | 14 | 470  | 332  | 35   | 332  | 330.35 | 2812 | 96.07  | 96.55046 |
| 367.67 | 2.74 | -1.03 | 35   | 122  | 18 | 458  | 346  | 35   | 346  | 344.28 | 2814 | 96.064 | 96.54451 |
| 367.96 | 2.71 | -1.03 | 35   | 122  | 24 | 470  | 314  | 35   | 314  | 312.44 | 2816 | 96.059 | 96.53897 |
| 368.26 | 2.69 | -1.03 | 35   | 130  | 26 | 450  | 338  | 35   | 338  | 336.32 | 2818 | 96.054 | 96.53407 |
| 368.41 | 2.66 | -1.02 | 35   | 128  | 18 | 520  | 316  | 35   | 316  | 314.43 | 2819 | 96.05  | 96.52987 |
| 368.78 | 2.64 | -1.02 | 35.1 | 118  | 22 | 504  | 368  | 35.1 | 368  | 366.17 | 2821 | 96.046 | 96.52631 |
| 368.88 | 2.62 | -1.02 | 35.1 | 114  | 26 | 530  | 370  | 35.1 | 370  | 368.16 | 2823 | 96.043 | 96.52308 |
| 369.11 | 2.59 | -1.02 | 35.1 | 108  | 30 | 558  | 390  | 35.1 | 390  | 388.06 | 2825 | 96.04  | 96.5198  |
| 369.44 | 2.57 | -1.02 | 35.1 | 92   | 18 | 558  | 376  | 35.1 | 376  | 374.13 | 2827 | 96.036 | 96.51618 |
| 369.57 | 2.54 | -1.02 | 35.1 | 92   | 16 | 520  | 386  | 35.1 | 386  | 384.08 | 2829 | 96.032 | 96.51204 |
| 369.92 | 2.52 | -1.03 | 35.2 | 88   | 16 | 652  | 428  | 35.2 | 428  | 425.87 | 2831 | 96.027 | 96.50739 |
| 370.07 | 2.49 | -1.03 | 35.2 | 112  | 18 | 606  | 460  | 35.2 | 460  | 457.71 | 2833 | 96.022 | 96.50243 |
| 370.26 | 2.47 | -1.03 | 35.2 | 100  | 14 | 664  | 460  | 35.2 | 460  | 457.71 | 2835 | 96.017 | 96.49742 |
| 370.7  | 2.44 | -1.03 | 35.2 | 90   | 20 | 706  | 486  | 35.2 | 486  | 483.58 | 2837 | 96.013 | 96.4926  |
| 370.9  | 2.42 | -1.03 | 35.2 | 110  | 22 | 820  | 530  | 35.2 | 530  | 527.36 | 2839 | 96.008 | 96.4882  |
| 371.24 | 2.39 | -1.03 | 35.3 | 108  | 20 | 848  | 556  | 35.3 | 556  | 553.23 | 2841 | 96.004 | 96.48424 |
| 371.51 | 2.37 | -1.03 | 35.3 | 84   | 28 | 930  | 616  | 35.3 | 616  | 612.94 | 2843 | 96.001 | 96.48059 |
| 371.67 | 2.34 | -1.03 | 35.3 | 98   | 16 | 1058 | 604  | 35.3 | 604  | 601    | 2845 | 95.997 | 96.47701 |

|        |      |       |      |      |    |      |      |      |      |        |      |        |          |
|--------|------|-------|------|------|----|------|------|------|------|--------|------|--------|----------|
| 372.03 | 2.32 | -1.03 | 35.3 | 94   | 12 | 1158 | 648  | 35.3 | 648  | 644.78 | 2846 | 95.993 | 96.4732  |
| 372.14 | 2.29 | -1.03 | 35.3 | 90   | 18 | 1294 | 628  | 35.3 | 628  | 624.88 | 2848 | 95.989 | 96.46892 |
| 372.41 | 2.27 | -1.03 | 35.4 | 114  | 30 | 1400 | 726  | 35.4 | 726  | 722.39 | 2850 | 95.984 | 96.46405 |
| 372.68 | 2.25 | -1.03 | 35.4 | 92   | 20 | 1650 | 696  | 35.4 | 696  | 692.54 | 2852 | 95.979 | 96.45859 |
| 372.84 | 2.22 | -1.03 | 35.4 | 130  | 32 | 1858 | 772  | 35.4 | 772  | 768.16 | 2854 | 95.973 | 96.45278 |
| 373.21 | 2.2  | -1.03 | 35.4 | 110  | 22 | 2282 | 864  | 35.4 | 864  | 859.7  | 2856 | 95.967 | 96.44693 |
| 373.35 | 2.18 | -1.03 | 35.4 | 98   | 22 | 2510 | 846  | 35.4 | 846  | 841.79 | 2858 | 95.962 | 96.44141 |
| 373.57 | 2.16 | -1.03 | 35.5 | 86   | 18 | 3008 | 906  | 35.5 | 906  | 901.49 | 2860 | 95.957 | 96.43657 |
| 373.95 | 2.13 | -1.03 | 35.5 | 96   | 20 | 3344 | 912  | 35.5 | 912  | 907.46 | 2862 | 95.953 | 96.43249 |
| 374.17 | 2.11 | -1.03 | 35.5 | 112  | 18 | 3780 | 910  | 35.5 | 910  | 905.47 | 2864 | 95.949 | 96.42918 |
| 374.56 | 2.09 | -1.03 | 35.5 | 106  | 26 | 4164 | 1016 | 35.5 | 1016 | 1010.9 | 2866 | 95.947 | 96.42629 |
| 374.77 | 2.07 | -1.03 | 35.5 | 82   | 28 | 4520 | 982  | 35.5 | 982  | 977.11 | 2868 | 95.944 | 96.42338 |
| 375    | 2.04 | -1.03 | 35.6 | 132  | 24 | 4922 | 1030 | 35.6 | 1030 | 1024.9 | 2870 | 95.94  | 96.42001 |
| 375.33 | 2.02 | -1.03 | 35.6 | 96   | 30 | 5096 | 1052 | 35.6 | 1052 | 1046.8 | 2872 | 95.936 | 96.41584 |
| 375.42 | 2    | -1.03 | 35.6 | 98   | 24 | 5244 | 1074 | 35.6 | 1074 | 1068.7 | 2873 | 95.931 | 96.41073 |
| 375.75 | 1.98 | -1.03 | 35.6 | 120  | 32 | 5224 | 998  | 35.6 | 998  | 993.03 | 2875 | 95.925 | 96.40471 |
| 375.98 | 1.95 | -1.03 | 35.6 | 120  | 42 | 5042 | 1028 | 35.6 | 1028 | 1022.9 | 2877 | 95.918 | 96.39804 |
| 376.17 | 1.93 | -1.03 | 35.7 | 132  | 30 | 4886 | 974  | 35.7 | 974  | 969.15 | 2879 | 95.911 | 96.39094 |
| 376.52 | 1.91 | -1.03 | 35.7 | 116  | 24 | 4630 | 950  | 35.7 | 950  | 945.27 | 2881 | 95.904 | 96.38369 |
| 376.66 | 1.89 | -1.03 | 35.7 | 126  | 26 | 4014 | 966  | 35.7 | 966  | 961.19 | 2883 | 95.897 | 96.37639 |
| 376.92 | 1.87 | -1.03 | 35.7 | 106  | 36 | 3572 | 932  | 35.7 | 932  | 927.36 | 2885 | 95.89  | 96.36911 |
| 377.25 | 1.85 | -1.04 | 35.7 | 148  | 32 | 3132 | 820  | 35.7 | 820  | 815.92 | 2887 | 95.882 | 96.36173 |
| 377.51 | 1.82 | -1.04 | 35.8 | 124  | 40 | 2726 | 828  | 35.8 | 828  | 823.88 | 2889 | 95.875 | 96.35416 |
| 377.89 | 1.8  | -1.04 | 35.8 | 162  | 36 | 2206 | 782  | 35.8 | 782  | 778.11 | 2891 | 95.867 | 96.34628 |
| 378.09 | 1.78 | -1.04 | 35.8 | 182  | 26 | 1956 | 762  | 35.8 | 762  | 758.21 | 2893 | 95.859 | 96.33801 |
| 378.35 | 1.76 | -1.04 | 35.8 | 188  | 32 | 1556 | 756  | 35.8 | 756  | 752.24 | 2895 | 95.85  | 96.32936 |
| 378.63 | 1.74 | -1.04 | 35.8 | 170  | 24 | 1310 | 738  | 35.8 | 738  | 734.33 | 2897 | 95.841 | 96.32032 |
| 378.76 | 1.72 | -1.04 | 35.9 | 188  | 34 | 1216 | 764  | 35.9 | 764  | 760.2  | 2899 | 95.832 | 96.31102 |
| 379.12 | 1.7  | -1.04 | 35.9 | 228  | 24 | 1066 | 732  | 35.9 | 732  | 728.36 | 2900 | 95.822 | 96.30148 |
| 379.3  | 1.68 | -1.04 | 35.9 | 228  | 36 | 944  | 758  | 35.9 | 758  | 754.23 | 2902 | 95.813 | 96.2919  |
| 379.53 | 1.66 | -1.04 | 35.9 | 268  | 38 | 820  | 730  | 35.9 | 730  | 726.37 | 2904 | 95.803 | 96.28234 |
| 379.84 | 1.64 | -1.04 | 35.9 | 288  | 28 | 802  | 802  | 35.9 | 802  | 798.01 | 2906 | 95.794 | 96.27293 |
| 379.96 | 1.62 | -1.04 | 36   | 334  | 36 | 768  | 862  | 36   | 862  | 857.71 | 2908 | 95.785 | 96.26376 |
| 380.28 | 1.6  | -1.04 | 36   | 388  | 30 | 690  | 846  | 36   | 846  | 841.79 | 2910 | 95.776 | 96.25492 |
| 380.55 | 1.58 | -1.04 | 36   | 438  | 32 | 618  | 948  | 36   | 948  | 943.28 | 2912 | 95.768 | 96.24643 |
| 380.87 | 1.56 | -1.04 | 36   | 454  | 50 | 634  | 1020 | 36   | 1020 | 1014.9 | 2914 | 95.759 | 96.23828 |
| 381.21 | 1.54 | -1.04 | 36   | 550  | 48 | 578  | 1068 | 36   | 1068 | 1062.7 | 2916 | 95.752 | 96.23037 |
| 381.4  | 1.52 | -1.04 | 36.1 | 650  | 46 | 528  | 1188 | 36.1 | 1188 | 1182.1 | 2918 | 95.744 | 96.22256 |
| 381.74 | 1.5  | -1.04 | 36.1 | 744  | 42 | 546  | 1234 | 36.1 | 1234 | 1227.9 | 2920 | 95.736 | 96.21468 |
| 381.94 | 1.48 | -1.04 | 36.1 | 870  | 38 | 532  | 1398 | 36.1 | 1398 | 1391   | 2922 | 95.728 | 96.20647 |
| 382.09 | 1.45 | -1.04 | 36.1 | 1086 | 56 | 474  | 1552 | 36.1 | 1552 | 1544.3 | 2924 | 95.719 | 96.19766 |
| 382.43 | 1.43 | -1.04 | 36.1 | 1238 | 60 | 478  | 1754 | 36.1 | 1754 | 1745.3 | 2926 | 95.709 | 96.18795 |
| 382.59 | 1.41 | -1.04 | 36.2 | 1572 | 52 | 468  | 1916 | 36.2 | 1916 | 1906.5 | 2927 | 95.699 | 96.17719 |
| 382.87 | 1.38 | -1.04 | 36.2 | 1940 | 56 | 500  | 2110 | 36.2 | 2110 | 2099.5 | 2929 | 95.687 | 96.16524 |
| 383.13 | 1.36 | -1.04 | 36.2 | 2280 | 60 | 450  | 2304 | 36.2 | 2304 | 2292.5 | 2931 | 95.674 | 96.15218 |
| 383.28 | 1.33 | -1.04 | 36.2 | 2804 | 64 | 480  | 2538 | 36.2 | 2538 | 2525.4 | 2933 | 95.66  | 96.13821 |
| 383.61 | 1.31 | -1.04 | 36.2 | 3428 | 62 | 486  | 2794 | 36.2 | 2794 | 2780.1 | 2935 | 95.645 | 96.12368 |

|        |      |       |      |      |     |     |      |      |      |        |      |        |          |
|--------|------|-------|------|------|-----|-----|------|------|------|--------|------|--------|----------|
| 383.85 | 1.28 | -1.04 | 36.3 | 4080 | 74  | 452 | 3024 | 36.3 | 3024 | 3009   | 2937 | 95.631 | 96.10892 |
| 384.19 | 1.26 | -1.04 | 36.3 | 4802 | 70  | 458 | 3100 | 36.3 | 3100 | 3084.6 | 2939 | 95.616 | 96.09424 |
| 384.51 | 1.24 | -1.04 | 36.3 | 5782 | 74  | 442 | 3070 | 36.3 | 3070 | 3054.7 | 2941 | 95.602 | 96.07986 |
| 384.69 | 1.21 | -1.04 | 36.3 | 6682 | 82  | 440 | 2910 | 36.3 | 2910 | 2895.5 | 2943 | 95.588 | 96.06572 |
| 385.07 | 1.19 | -1.04 | 36.3 | 7488 | 112 | 412 | 2940 | 36.3 | 2940 | 2925.4 | 2945 | 95.574 | 96.05175 |
| 385.24 | 1.17 | -1.04 | 36.4 | 7930 | 70  | 428 | 2646 | 36.4 | 2646 | 2632.8 | 2947 | 95.56  | 96.0377  |
| 385.45 | 1.14 | -1.04 | 36.4 | 8122 | 72  | 442 | 2546 | 36.4 | 2546 | 2533.3 | 2949 | 95.546 | 96.02343 |
| 385.73 | 1.12 | -1.04 | 36.4 | 8036 | 94  | 452 | 2312 | 36.4 | 2312 | 2300.5 | 2951 | 95.531 | 96.00886 |
| 385.9  | 1.1  | -1.05 | 36.4 | 7634 | 90  | 452 | 2150 | 36.4 | 2150 | 2139.3 | 2953 | 95.517 | 95.99412 |
| 386.22 | 1.08 | -1.05 | 36.4 | 7136 | 96  | 434 | 1900 | 36.4 | 1900 | 1890.5 | 2954 | 95.502 | 95.97935 |
| 386.43 | 1.06 | -1.05 | 36.5 | 6268 | 104 | 434 | 1662 | 36.5 | 1662 | 1653.7 | 2956 | 95.487 | 95.96483 |
| 386.62 | 1.03 | -1.05 | 36.5 | 5426 | 104 | 394 | 1430 | 36.5 | 1430 | 1422.9 | 2958 | 95.473 | 95.95075 |
| 386.91 | 1.01 | -1.05 | 36.5 | 4702 | 84  | 432 | 1250 | 36.5 | 1250 | 1243.8 | 2960 | 95.46  | 95.93718 |
| 387.11 | 0.99 | -1.05 | 36.5 | 3930 | 92  | 414 | 1068 | 36.5 | 1068 | 1062.7 | 2962 | 95.447 | 95.92408 |
| 387.55 | 0.97 | -1.05 | 36.5 | 3110 | 102 | 402 | 998  | 36.5 | 998  | 993.03 | 2964 | 95.434 | 95.91134 |
| 387.8  | 0.95 | -1.05 | 36.6 | 2466 | 90  | 376 | 876  | 36.6 | 876  | 871.64 | 2966 | 95.422 | 95.89876 |
| 388.01 | 0.93 | -1.05 | 36.6 | 1964 | 108 | 394 | 806  | 36.6 | 806  | 801.99 | 2968 | 95.409 | 95.88618 |
| 388.38 | 0.91 | -1.05 | 36.6 | 1624 | 88  | 390 | 674  | 36.6 | 674  | 670.65 | 2970 | 95.397 | 95.87352 |
| 388.53 | 0.89 | -1.05 | 36.6 | 1264 | 102 | 386 | 666  | 36.6 | 666  | 662.69 | 2972 | 95.384 | 95.86081 |
| 388.79 | 0.87 | -1.05 | 36.6 | 1038 | 74  | 430 | 568  | 36.6 | 568  | 565.17 | 2974 | 95.371 | 95.84805 |
| 389.02 | 0.85 | -1.05 | 36.7 | 884  | 74  | 420 | 498  | 36.7 | 498  | 495.52 | 2976 | 95.359 | 95.83536 |
| 389.19 | 0.83 | -1.05 | 36.7 | 758  | 90  | 380 | 518  | 36.7 | 518  | 515.42 | 2978 | 95.346 | 95.82272 |
| 389.55 | 0.81 | -1.05 | 36.7 | 676  | 80  | 418 | 456  | 36.7 | 456  | 453.73 | 2980 | 95.334 | 95.8102  |
| 389.71 | 0.79 | -1.05 | 36.7 | 562  | 94  | 414 | 416  | 36.7 | 416  | 413.93 | 2981 | 95.321 | 95.79774 |
| 389.95 | 0.77 | -1.05 | 36.7 | 468  | 78  | 414 | 378  | 36.7 | 378  | 376.12 | 2983 | 95.309 | 95.78541 |
| 390.22 | 0.75 | -1.05 | 36.8 | 444  | 76  | 408 | 412  | 36.8 | 412  | 409.95 | 2985 | 95.297 | 95.77317 |
| 390.43 | 0.73 | -1.05 | 36.8 | 370  | 54  | 402 | 340  | 36.8 | 340  | 338.31 | 2987 | 95.285 | 95.76116 |
| 390.91 | 0.71 | -1.05 | 36.8 | 302  | 76  | 394 | 332  | 36.8 | 332  | 330.35 | 2989 | 95.273 | 95.74938 |
| 391.12 | 0.69 | -1.05 | 36.8 | 282  | 64  | 384 | 328  | 36.8 | 328  | 326.37 | 2991 | 95.262 | 95.7379  |
| 391.38 | 0.67 | -1.05 | 36.8 | 262  | 64  | 414 | 312  | 36.8 | 312  | 310.45 | 2993 | 95.25  | 95.72673 |
| 391.71 | 0.65 | -1.05 | 36.9 | 230  | 70  | 392 | 302  | 36.9 | 302  | 300.5  | 2995 | 95.24  | 95.7158  |
| 391.85 | 0.63 | -1.05 | 36.9 | 248  | 64  | 414 | 294  | 36.9 | 294  | 292.54 | 2997 | 95.229 | 95.70497 |
| 392.16 | 0.62 | -1.05 | 36.9 | 212  | 76  | 424 | 314  | 36.9 | 314  | 312.44 | 2999 | 95.218 | 95.69411 |
| 392.35 | 0.6  | -1.05 | 36.9 | 170  | 82  | 400 | 268  | 36.9 | 268  | 266.67 | 3001 | 95.207 | 95.68308 |
| 392.57 | 0.58 | -1.05 | 36.9 | 180  | 82  | 412 | 288  | 36.9 | 288  | 286.57 | 3003 | 95.196 | 95.67178 |
| 392.9  | 0.57 | -1.05 | 37   | 192  | 74  | 418 | 274  | 37   | 274  | 272.64 | 3005 | 95.184 | 95.66028 |
| 393.06 | 0.55 | -1.05 | 37   | 178  | 74  | 412 | 280  | 37   | 280  | 278.61 | 3007 | 95.173 | 95.64864 |
| 393.36 | 0.54 | -1.05 | 37   | 158  | 96  | 422 | 284  | 37   | 284  | 282.59 | 3008 | 95.161 | 95.63701 |
| 393.58 | 0.52 | -1.05 | 37   | 150  | 92  | 392 | 270  | 37   | 270  | 268.66 | 3010 | 95.15  | 95.62551 |
| 393.8  | 0.51 | -1.05 | 37   | 126  | 80  | 384 | 298  | 37   | 298  | 296.52 | 3012 | 95.139 | 95.61419 |
| 394.26 | 0.49 | -1.05 | 37.1 | 132  | 100 | 380 | 274  | 37.1 | 274  | 272.64 | 3014 | 95.127 | 95.60306 |
| 394.45 | 0.48 | -1.05 | 37.1 | 130  | 106 | 390 | 320  | 37.1 | 320  | 318.41 | 3016 | 95.116 | 95.59195 |
| 394.77 | 0.46 | -1.04 | 37.1 | 122  | 130 | 398 | 284  | 37.1 | 284  | 282.59 | 3018 | 95.105 | 95.58066 |
| 395.06 | 0.45 | -1.04 | 37.1 | 108  | 136 | 392 | 332  | 37.1 | 332  | 330.35 | 3020 | 95.093 | 95.56896 |
| 395.22 | 0.43 | -1.04 | 37.1 | 102  | 148 | 438 | 308  | 37.1 | 308  | 306.47 | 3022 | 95.081 | 95.55672 |
| 395.57 | 0.41 | -1.04 | 37.2 | 86   | 128 | 360 | 326  | 37.2 | 326  | 324.38 | 3024 | 95.069 | 95.54391 |
| 395.69 | 0.39 | -1.04 | 37.2 | 92   | 160 | 350 | 340  | 37.2 | 340  | 338.31 | 3026 | 95.055 | 95.53068 |

|        |       |       |      |    |     |     |     |      |     |        |      |        |          |
|--------|-------|-------|------|----|-----|-----|-----|------|-----|--------|------|--------|----------|
| 395.95 | 0.38  | -1.04 | 37.2 | 90 | 168 | 386 | 306 | 37.2 | 306 | 304.48 | 3028 | 95.042 | 95.51725 |
| 396.27 | 0.36  | -1.03 | 37.2 | 76 | 168 | 410 | 356 | 37.2 | 356 | 354.23 | 3030 | 95.029 | 95.50402 |
| 396.42 | 0.35  | -1.03 | 37.2 | 82 | 188 | 412 | 360 | 37.2 | 360 | 358.21 | 3032 | 95.016 | 95.49122 |
| 396.77 | 0.33  | -1.03 | 37.3 | 84 | 224 | 358 | 382 | 37.3 | 382 | 380.1  | 3034 | 95.004 | 95.47898 |
| 396.94 | 0.31  | -1.03 | 37.3 | 78 | 272 | 374 | 356 | 37.3 | 356 | 354.23 | 3035 | 94.992 | 95.46727 |
| 397.19 | 0.3   | -1.03 | 37.3 | 74 | 292 | 386 | 372 | 37.3 | 372 | 370.15 | 3037 | 94.981 | 95.45584 |
| 397.63 | 0.29  | -1.03 | 37.3 | 56 | 332 | 370 | 358 | 37.3 | 358 | 356.22 | 3039 | 94.97  | 95.44437 |
| 397.83 | 0.27  | -1.03 | 37.3 | 74 | 346 | 410 | 286 | 37.3 | 286 | 284.58 | 3041 | 94.958 | 95.43251 |
| 398.18 | 0.25  | -1.03 | 37.4 | 72 | 368 | 380 | 288 | 37.4 | 288 | 286.57 | 3043 | 94.945 | 95.42005 |
| 398.42 | 0.24  | -1.03 | 37.4 | 70 | 416 | 394 | 274 | 37.4 | 274 | 272.64 | 3045 | 94.932 | 95.40699 |
| 398.61 | 0.22  | -1.03 | 37.4 | 66 | 418 | 374 | 246 | 37.4 | 246 | 244.78 | 3047 | 94.919 | 95.39345 |
| 398.96 | 0.21  | -1.03 | 37.4 | 74 | 468 | 390 | 268 | 37.4 | 268 | 266.67 | 3049 | 94.905 | 95.37976 |
| 399.05 | 0.19  | -1.03 | 37.4 | 66 | 418 | 408 | 224 | 37.4 | 224 | 222.89 | 3051 | 94.892 | 95.3662  |
| 399.37 | 0.18  | -1.03 | 37.5 | 76 | 426 | 342 | 206 | 37.5 | 206 | 204.98 | 3053 | 94.879 | 95.35311 |
| 399.62 | 0.17  | -1.03 | 37.5 | 54 | 432 | 382 | 208 | 37.5 | 208 | 206.97 | 3055 | 94.866 | 95.34067 |
| 399.8  | 0.15  | -1.03 | 37.5 | 68 | 402 | 424 | 210 | 37.5 | 210 | 208.96 | 3057 | 94.855 | 95.32885 |
| 400.17 | 0.13  | -1.03 | 37.5 | 70 | 320 | 418 | 170 | 37.5 | 170 | 169.15 | 3059 | 94.843 | 95.31755 |
| 400.29 | 0.12  | -1.03 | 37.5 | 66 | 346 | 406 | 172 | 37.5 | 172 | 171.14 | 3061 | 94.832 | 95.30654 |
| 400.57 | 0.1   | -1.03 | 37.6 | 58 | 300 | 402 | 162 | 37.6 | 162 | 161.19 | 3062 | 94.821 | 95.29553 |
| 400.98 | 0.09  | -1.03 | 37.6 | 48 | 244 | 390 | 164 | 37.6 | 164 | 163.18 | 3064 | 94.81  | 95.28435 |
| 401.17 | 0.07  | -1.03 | 37.6 | 60 | 250 | 418 | 180 | 37.6 | 180 | 179.1  | 3066 | 94.799 | 95.27283 |
| 401.57 | 0.06  | -1.03 | 37.6 | 54 | 192 | 424 | 156 | 37.6 | 156 | 155.22 | 3068 | 94.787 | 95.2609  |
| 401.76 | 0.04  | -1.03 | 37.6 | 70 | 168 | 408 | 130 | 37.6 | 130 | 129.35 | 3070 | 94.775 | 95.24848 |
| 402    | 0.03  | -1.03 | 37.7 | 50 | 154 | 470 | 154 | 37.7 | 154 | 153.23 | 3072 | 94.762 | 95.23559 |
| 402.31 | 0.01  | -1.03 | 37.7 | 48 | 128 | 378 | 148 | 37.7 | 148 | 147.26 | 3074 | 94.748 | 95.22218 |
| 402.39 | 0     | -1.03 | 37.7 | 62 | 132 | 394 | 162 | 37.7 | 162 | 161.19 | 3076 | 94.735 | 95.2083  |
| 402.78 | -0.02 | -1.03 | 37.7 | 52 | 116 | 426 | 142 | 37.7 | 142 | 141.29 | 3078 | 94.72  | 95.1938  |
| 402.98 | -0.03 | -1.03 | 37.7 | 44 | 100 | 418 | 122 | 37.7 | 122 | 121.39 | 3080 | 94.705 | 95.17882 |
| 403.19 | -0.05 | -1.03 | 37.8 | 48 | 104 | 414 | 148 | 37.8 | 148 | 147.26 | 3082 | 94.69  | 95.16332 |
| 403.54 | -0.06 | -1.03 | 37.8 | 50 | 110 | 430 | 136 | 37.8 | 136 | 135.32 | 3084 | 94.674 | 95.14741 |
| 403.66 | -0.07 | -1.03 | 37.8 | 56 | 74  | 434 | 116 | 37.8 | 116 | 115.42 | 3086 | 94.658 | 95.13117 |
| 403.97 | -0.09 | -1.03 | 37.8 | 48 | 82  | 408 | 138 | 37.8 | 138 | 137.31 | 3088 | 94.641 | 95.11466 |
| 404.32 | -0.1  | -1.03 | 37.8 | 52 | 84  | 424 | 142 | 37.8 | 142 | 141.29 | 3089 | 94.625 | 95.09788 |
| 404.55 | -0.12 | -1.03 | 37.9 | 56 | 84  | 392 | 148 | 37.9 | 148 | 147.26 | 3091 | 94.608 | 95.08087 |
| 404.95 | -0.13 | -1.03 | 37.9 | 52 | 76  | 418 | 148 | 37.9 | 148 | 147.26 | 3093 | 94.591 | 95.06353 |
| 405.12 | -0.15 | -1.03 | 37.9 | 48 | 80  | 450 | 136 | 37.9 | 136 | 135.32 | 3095 | 94.573 | 95.04583 |
| 405.4  | -0.16 | -1.03 | 37.9 | 54 | 62  | 420 | 116 | 37.9 | 116 | 115.42 | 3097 | 94.555 | 95.02769 |
| 405.66 | -0.18 | -1.03 | 37.9 | 60 | 64  | 494 | 140 | 37.9 | 140 | 139.3  | 3099 | 94.537 | 95.0092  |
| 405.8  | -0.2  | -1.03 | 38   | 72 | 56  | 444 | 144 | 38   | 144 | 143.28 | 3101 | 94.518 | 94.99042 |
| 406.17 | -0.21 | -1.03 | 38   | 56 | 58  | 432 | 130 | 38   | 130 | 129.35 | 3103 | 94.499 | 94.97159 |
| 406.35 | -0.23 | -1.03 | 38   | 72 | 54  | 470 | 136 | 38   | 136 | 135.32 | 3105 | 94.48  | 94.95282 |
| 406.6  | -0.24 | -1.03 | 38   | 62 | 40  | 474 | 132 | 38   | 132 | 131.34 | 3107 | 94.462 | 94.93427 |
| 406.9  | -0.26 | -1.03 | 38   | 62 | 56  | 490 | 142 | 38   | 142 | 141.29 | 3109 | 94.444 | 94.91589 |
| 407.02 | -0.28 | -1.03 | 38.1 | 70 | 44  | 524 | 146 | 38.1 | 146 | 145.27 | 3111 | 94.426 | 94.89763 |
| 407.38 | -0.3  | -1.03 | 38.1 | 64 | 50  | 528 | 120 | 38.1 | 120 | 119.4  | 3113 | 94.407 | 94.87928 |
| 407.68 | -0.32 | -1.03 | 38.1 | 62 | 36  | 554 | 136 | 38.1 | 136 | 135.32 | 3115 | 94.389 | 94.86063 |
| 407.97 | -0.34 | -1.03 | 38.1 | 62 | 34  | 488 | 134 | 38.1 | 134 | 133.33 | 3116 | 94.37  | 94.84162 |

|        |       |       |      |    |    |      |     |      |     |        |      |        |          |
|--------|-------|-------|------|----|----|------|-----|------|-----|--------|------|--------|----------|
| 408.31 | -0.36 | -1.03 | 38.1 | 60 | 44 | 590  | 158 | 38.1 | 158 | 157.21 | 3118 | 94.35  | 94.82211 |
| 408.5  | -0.38 | -1.03 | 38.2 | 62 | 48 | 570  | 146 | 38.2 | 146 | 145.27 | 3120 | 94.331 | 94.80217 |
| 408.83 | -0.4  | -1.03 | 38.2 | 58 | 36 | 544  | 150 | 38.2 | 150 | 149.25 | 3122 | 94.31  | 94.78194 |
| 409.05 | -0.42 | -1.03 | 38.2 | 42 | 34 | 562  | 156 | 38.2 | 156 | 155.22 | 3124 | 94.29  | 94.76145 |
| 409.21 | -0.44 | -1.03 | 38.2 | 52 | 38 | 538  | 140 | 38.2 | 140 | 139.3  | 3126 | 94.269 | 94.74074 |
| 409.55 | -0.47 | -1.03 | 38.2 | 62 | 38 | 530  | 166 | 38.2 | 166 | 165.17 | 3128 | 94.248 | 94.71971 |
| 409.73 | -0.49 | -1.03 | 38.3 | 52 | 34 | 578  | 170 | 38.3 | 170 | 169.15 | 3130 | 94.227 | 94.69834 |
| 410.03 | -0.51 | -1.03 | 38.3 | 40 | 50 | 568  | 130 | 38.3 | 130 | 129.35 | 3132 | 94.205 | 94.67649 |
| 410.26 | -0.53 | -1.03 | 38.3 | 56 | 24 | 578  | 192 | 38.3 | 192 | 191.04 | 3134 | 94.183 | 94.65423 |
| 410.44 | -0.55 | -1.03 | 38.3 | 42 | 42 | 600  | 152 | 38.3 | 152 | 151.24 | 3136 | 94.161 | 94.63168 |
| 410.78 | -0.58 | -1.03 | 38.3 | 42 | 38 | 610  | 186 | 38.3 | 186 | 185.07 | 3138 | 94.139 | 94.60922 |
| 411.04 | -0.6  | -1.03 | 38.4 | 54 | 32 | 668  | 158 | 38.4 | 158 | 157.21 | 3140 | 94.117 | 94.58711 |
| 411.4  | -0.62 | -1.03 | 38.4 | 26 | 46 | 694  | 162 | 38.4 | 162 | 161.19 | 3142 | 94.095 | 94.56566 |
| 411.7  | -0.64 | -1.03 | 38.4 | 40 | 32 | 748  | 174 | 38.4 | 174 | 173.13 | 3143 | 94.075 | 94.54495 |
| 411.91 | -0.66 | -1.03 | 38.4 | 46 | 40 | 726  | 182 | 38.4 | 182 | 181.09 | 3145 | 94.055 | 94.52483 |
| 412.3  | -0.68 | -1.03 | 38.4 | 34 | 34 | 816  | 188 | 38.4 | 188 | 187.06 | 3147 | 94.035 | 94.50495 |
| 412.46 | -0.7  | -1.03 | 38.5 | 30 | 32 | 872  | 198 | 38.5 | 198 | 197.01 | 3149 | 94.015 | 94.48489 |
| 412.67 | -0.72 | -1.03 | 38.5 | 34 | 36 | 878  | 222 | 38.5 | 222 | 220.9  | 3151 | 93.994 | 94.4642  |
| 412.98 | -0.74 | -1.03 | 38.5 | 32 | 36 | 1068 | 268 | 38.5 | 268 | 266.67 | 3153 | 93.973 | 94.44267 |
| 413.14 | -0.76 | -1.03 | 38.5 | 30 | 60 | 1160 | 246 | 38.5 | 246 | 244.78 | 3155 | 93.95  | 94.42021 |
| 413.5  | -0.78 | -1.03 | 38.5 | 32 | 52 | 1196 | 282 | 38.5 | 282 | 280.6  | 3157 | 93.927 | 94.39711 |
| 413.7  | -0.8  | -1.03 | 38.6 | 34 | 52 | 1356 | 282 | 38.6 | 282 | 280.6  | 3159 | 93.904 | 94.37362 |
| 413.91 | -0.81 | -1.03 | 38.6 | 26 | 40 | 1582 | 336 | 38.6 | 336 | 334.33 | 3161 | 93.881 | 94.3502  |
| 414.22 | -0.83 | -1.03 | 38.6 | 44 | 38 | 1680 | 332 | 38.6 | 332 | 330.35 | 3163 | 93.858 | 94.32709 |
| 414.47 | -0.85 | -1.03 | 38.6 | 34 | 50 | 2042 | 342 | 38.6 | 342 | 340.3  | 3165 | 93.835 | 94.30448 |
| 414.9  | -0.87 | -1.03 | 38.6 | 34 | 58 | 2312 | 386 | 38.6 | 386 | 384.08 | 3167 | 93.813 | 94.28226 |
| 415.15 | -0.89 | -1.03 | 38.7 | 30 | 40 | 2512 | 394 | 38.7 | 394 | 392.04 | 3169 | 93.791 | 94.26034 |
| 415.42 | -0.91 | -1.03 | 38.7 | 34 | 58 | 3052 | 438 | 38.7 | 438 | 435.82 | 3170 | 93.77  | 94.23848 |
| 415.77 | -0.93 | -1.03 | 38.7 | 36 | 60 | 3364 | 458 | 38.7 | 458 | 455.72 | 3172 | 93.748 | 94.21651 |
| 415.93 | -0.95 | -1.03 | 38.7 | 36 | 52 | 3702 | 446 | 38.7 | 446 | 443.78 | 3174 | 93.726 | 94.19427 |
| 416.21 | -0.97 | -1.03 | 38.7 | 26 | 52 | 4128 | 496 | 38.7 | 496 | 493.53 | 3176 | 93.703 | 94.17172 |
| 416.46 | -0.98 | -1.03 | 38.8 | 38 | 52 | 4538 | 522 | 38.8 | 522 | 519.4  | 3178 | 93.68  | 94.14878 |
| 416.66 | -1    | -1.03 | 38.8 | 22 | 54 | 4828 | 524 | 38.8 | 524 | 521.39 | 3180 | 93.657 | 94.12551 |
| 417.01 | -1.01 | -1.03 | 38.8 | 30 | 38 | 4966 | 466 | 38.8 | 466 | 463.68 | 3182 | 93.634 | 94.10189 |
| 417.19 | -1.03 | -1.03 | 38.8 | 20 | 46 | 4888 | 476 | 38.8 | 476 | 473.63 | 3184 | 93.61  | 94.07797 |
| 417.44 | -1.05 | -1.03 | 38.8 | 34 | 58 | 4938 | 448 | 38.8 | 448 | 445.77 | 3186 | 93.586 | 94.05377 |
| 417.71 | -1.06 | -1.03 | 38.9 | 18 | 54 | 4812 | 430 | 38.9 | 430 | 427.86 | 3188 | 93.562 | 94.02936 |
| 417.96 | -1.08 | -1.03 | 38.9 | 20 | 48 | 4494 | 404 | 38.9 | 404 | 401.99 | 3190 | 93.537 | 94.00485 |
| 418.41 | -1.09 | -1.03 | 38.9 | 28 | 52 | 4242 | 392 | 38.9 | 392 | 390.05 | 3192 | 93.513 | 93.98036 |
| 418.62 | -1.11 | -1.03 | 38.9 | 32 | 50 | 4102 | 384 | 38.9 | 384 | 382.09 | 3194 | 93.489 | 93.95596 |
| 418.93 | -1.12 | -1.03 | 38.9 | 32 | 42 | 3636 | 358 | 38.9 | 358 | 356.22 | 3196 | 93.464 | 93.93169 |
| 419.25 | -1.14 | -1.03 | 39   | 34 | 42 | 3444 | 322 | 39   | 322 | 320.4  | 3197 | 93.44  | 93.90748 |
| 419.41 | -1.15 | -1.03 | 39   | 26 | 32 | 3052 | 304 | 39   | 304 | 302.49 | 3199 | 93.416 | 93.88328 |
| 419.74 | -1.17 | -1.03 | 39   | 38 | 34 | 2814 | 290 | 39   | 290 | 288.56 | 3201 | 93.392 | 93.85892 |
| 419.92 | -1.18 | -1.03 | 39   | 32 | 34 | 2572 | 286 | 39   | 286 | 284.58 | 3203 | 93.367 | 93.83426 |
| 420.16 | -1.2  | -1.03 | 39   | 30 | 38 | 2392 | 262 | 39   | 262 | 260.7  | 3205 | 93.343 | 93.80927 |
| 420.49 | -1.21 | -1.03 | 39.1 | 26 | 30 | 2256 | 244 | 39.1 | 244 | 242.79 | 3207 | 93.317 | 93.78395 |

|        |       |       |      |    |    |      |     |      |     |        |      |        |          |
|--------|-------|-------|------|----|----|------|-----|------|-----|--------|------|--------|----------|
| 420.64 | -1.23 | -1.03 | 39.1 | 24 | 24 | 2098 | 264 | 39.1 | 264 | 262.69 | 3209 | 93.292 | 93.75838 |
| 420.97 | -1.25 | -1.03 | 39.1 | 28 | 32 | 1916 | 218 | 39.1 | 218 | 216.92 | 3211 | 93.266 | 93.73273 |
| 421.17 | -1.26 | -1.03 | 39.1 | 30 | 24 | 1680 | 216 | 39.1 | 216 | 214.93 | 3213 | 93.241 | 93.70717 |
| 421.45 | -1.28 | -1.03 | 39.1 | 38 | 22 | 1492 | 212 | 39.1 | 212 | 210.95 | 3215 | 93.216 | 93.68186 |
| 421.92 | -1.3  | -1.03 | 39.2 | 24 | 18 | 1376 | 166 | 39.2 | 166 | 165.17 | 3217 | 93.191 | 93.65683 |
| 422.11 | -1.31 | -1.03 | 39.2 | 28 | 30 | 1262 | 162 | 39.2 | 162 | 161.19 | 3219 | 93.166 | 93.63214 |
| 422.45 | -1.33 | -1.03 | 39.2 | 26 | 28 | 1122 | 164 | 39.2 | 164 | 163.18 | 3221 | 93.142 | 93.60769 |
| 422.71 | -1.34 | -1.03 | 39.2 | 26 | 22 | 962  | 154 | 39.2 | 154 | 153.23 | 3223 | 93.118 | 93.58341 |
| 422.88 | -1.36 | -1.03 | 39.2 | 24 | 18 | 886  | 154 | 39.2 | 154 | 153.23 | 3224 | 93.094 | 93.55919 |
| 423.23 | -1.37 | -1.03 | 39.3 | 22 | 20 | 798  | 140 | 39.3 | 140 | 139.3  | 3226 | 93.07  | 93.53501 |
| 423.35 | -1.39 | -1.03 | 39.3 | 36 | 30 | 746  | 150 | 39.3 | 150 | 149.25 | 3228 | 93.046 | 93.51083 |
| 423.65 | -1.4  | -1.03 | 39.3 | 20 | 26 | 670  | 124 | 39.3 | 124 | 123.38 | 3230 | 93.022 | 93.48667 |
| 423.94 | -1.42 | -1.03 | 39.3 | 18 | 22 | 672  | 140 | 39.3 | 140 | 139.3  | 3232 | 92.998 | 93.46259 |
| 424.1  | -1.43 | -1.03 | 39.3 | 26 | 16 | 614  | 154 | 39.3 | 154 | 153.23 | 3234 | 92.974 | 93.4387  |
| 424.47 | -1.44 | -1.03 | 39.4 | 22 | 16 | 626  | 134 | 39.4 | 134 | 133.33 | 3236 | 92.95  | 93.41509 |
| 424.61 | -1.46 | -1.03 | 39.4 | 30 | 18 | 550  | 118 | 39.4 | 118 | 117.41 | 3238 | 92.927 | 93.39186 |
| 424.92 | -1.47 | -1.03 | 39.4 | 18 | 20 | 504  | 122 | 39.4 | 122 | 121.39 | 3240 | 92.905 | 93.36904 |
| 425.36 | -1.48 | -1.03 | 39.4 | 24 | 30 | 590  | 134 | 39.4 | 134 | 133.33 | 3242 | 92.882 | 93.34674 |
| 425.53 | -1.49 | -1.03 | 39.4 | 28 | 14 | 514  | 132 | 39.4 | 132 | 131.34 | 3244 | 92.861 | 93.32493 |
| 425.91 | -1.5  | -1.03 | 39.5 | 24 | 20 | 516  | 114 | 39.5 | 114 | 113.43 | 3246 | 92.839 | 93.30356 |
| 426.13 | -1.51 | -1.03 | 39.5 | 20 | 18 | 526  | 122 | 39.5 | 122 | 121.39 | 3248 | 92.818 | 93.28245 |
| 426.34 | -1.52 | -1.03 | 39.5 | 22 | 26 | 494  | 114 | 39.5 | 114 | 113.43 | 3250 | 92.797 | 93.26144 |
| 426.65 | -1.53 | -1.03 | 39.5 | 30 | 24 | 496  | 102 | 39.5 | 102 | 101.49 | 3251 | 92.776 | 93.24037 |
| 426.78 | -1.55 | -1.03 | 39.5 | 30 | 16 | 458  | 114 | 39.5 | 114 | 113.43 | 3253 | 92.755 | 93.21906 |
| 427.12 | -1.56 | -1.03 | 39.6 | 28 | 22 | 450  | 122 | 39.6 | 122 | 121.39 | 3255 | 92.734 | 93.1974  |
| 427.34 | -1.57 | -1.03 | 39.6 | 40 | 16 | 472  | 128 | 39.6 | 128 | 127.36 | 3257 | 92.712 | 93.17549 |
| 427.53 | -1.59 | -1.03 | 39.6 | 16 | 16 | 460  | 114 | 39.6 | 114 | 113.43 | 3259 | 92.69  | 93.1534  |
| 427.9  | -1.6  | -1.03 | 39.6 | 20 | 14 | 470  | 134 | 39.6 | 134 | 133.33 | 3261 | 92.668 | 93.13131 |
| 428.03 | -1.61 | -1.03 | 39.6 | 30 | 26 | 412  | 120 | 39.6 | 120 | 119.4  | 3263 | 92.646 | 93.10929 |
| 428.35 | -1.62 | -1.03 | 39.7 | 18 | 18 | 460  | 124 | 39.7 | 124 | 123.38 | 3265 | 92.624 | 93.0874  |
| 428.73 | -1.64 | -1.03 | 39.7 | 24 | 20 | 404  | 132 | 39.7 | 132 | 131.34 | 3267 | 92.602 | 93.0655  |
| 428.94 | -1.65 | -1.03 | 39.7 | 24 | 22 | 454  | 152 | 39.7 | 152 | 151.24 | 3269 | 92.581 | 93.0435  |
| 429.31 | -1.67 | -1.03 | 39.7 | 40 | 14 | 442  | 134 | 39.7 | 134 | 133.33 | 3271 | 92.558 | 93.02124 |
| 429.5  | -1.68 | -1.03 | 39.7 | 32 | 16 | 454  | 130 | 39.7 | 130 | 129.35 | 3273 | 92.536 | 92.99877 |
| 429.75 | -1.7  | -1.03 | 39.8 | 22 | 18 | 414  | 112 | 39.8 | 112 | 111.44 | 3275 | 92.514 | 92.97626 |
| 430.03 | -1.71 | -1.03 | 39.8 | 24 | 18 | 408  | 116 | 39.8 | 116 | 115.42 | 3277 | 92.492 | 92.95411 |
| 430.16 | -1.73 | -1.03 | 39.8 | 26 | 16 | 424  | 124 | 39.8 | 124 | 123.38 | 3278 | 92.47  | 92.93268 |
| 430.51 | -1.75 | -1.03 | 39.8 | 20 | 12 | 438  | 108 | 39.8 | 108 | 107.46 | 3280 | 92.45  | 92.91236 |
| 430.71 | -1.76 | -1.03 | 39.8 | 26 | 18 | 456  | 104 | 39.8 | 104 | 103.48 | 3282 | 92.431 | 92.89327 |
| 430.96 | -1.78 | -1.03 | 39.9 | 32 | 18 | 446  | 124 | 39.9 | 124 | 123.38 | 3284 | 92.413 | 92.87534 |
| 431.28 | -1.8  | -1.03 | 39.9 | 30 | 14 | 416  | 106 | 39.9 | 106 | 105.47 | 3286 | 92.396 | 92.85824 |
| 431.4  | -1.81 | -1.03 | 39.9 | 34 | 18 | 422  | 130 | 39.9 | 130 | 129.35 | 3288 | 92.38  | 92.84157 |
| 431.79 | -1.83 | -1.03 | 39.9 | 40 | 18 | 406  | 116 | 39.9 | 116 | 115.42 | 3290 | 92.363 | 92.82489 |
| 432.1  | -1.85 | -1.03 | 39.9 | 40 | 16 | 440  | 100 | 39.9 | 100 | 99.502 | 3292 | 92.346 | 92.8079  |
| 432.35 | -1.87 | -1.03 | 40   | 36 | 12 | 434  | 106 | 40   | 106 | 105.47 | 3294 | 92.329 | 92.79044 |
| 432.74 | -1.89 | -1.03 | 40   | 36 | 20 | 462  | 90  | 40   | 90  | 89.552 | 3296 | 92.311 | 92.77256 |
| 432.92 | -1.9  | -1.03 | 40   | 36 | 12 | 426  | 106 | 40   | 106 | 105.47 | 3298 | 92.293 | 92.75437 |

|        |       |       |      |    |    |     |     |      |     |        |      |        |          |
|--------|-------|-------|------|----|----|-----|-----|------|-----|--------|------|--------|----------|
| 433.22 | -1.92 | -1.03 | 40   | 42 | 12 | 376 | 98  | 40   | 98  | 97.512 | 3300 | 92.275 | 92.73607 |
| 433.48 | -1.94 | -1.03 | 40   | 38 | 14 | 432 | 90  | 40   | 90  | 89.552 | 3302 | 92.257 | 92.71786 |
| 433.61 | -1.96 | -1.03 | 40.1 | 32 | 20 | 380 | 122 | 40.1 | 122 | 121.39 | 3304 | 92.239 | 92.69992 |
| 433.99 | -1.98 | -1.03 | 40.1 | 34 | 20 | 412 | 86  | 40.1 | 86  | 85.572 | 3305 | 92.221 | 92.6825  |
| 434.19 | -2    | -1.03 | 40.1 | 40 | 20 | 432 | 104 | 40.1 | 104 | 103.48 | 3307 | 92.205 | 92.66578 |
| 434.47 | -2.01 | -1.03 | 40.1 | 42 | 18 | 422 | 106 | 40.1 | 106 | 105.47 | 3309 | 92.189 | 92.64987 |
| 434.75 | -2.04 | -1.03 | 40.1 | 34 | 14 | 390 | 86  | 40.1 | 86  | 85.572 | 3311 | 92.174 | 92.63484 |
| 434.9  | -2.06 | -1.03 | 40.2 | 36 | 22 | 390 | 102 | 40.2 | 102 | 101.49 | 3313 | 92.16  | 92.62044 |
| 435.28 | -2.08 | -1.03 | 40.2 | 20 | 14 | 422 | 94  | 40.2 | 94  | 93.532 | 3315 | 92.146 | 92.60631 |
| 435.56 | -2.1  | -1.03 | 40.2 | 28 | 22 | 420 | 102 | 40.2 | 102 | 101.49 | 3317 | 92.131 | 92.59186 |
| 435.86 | -2.12 | -1.03 | 40.2 | 32 | 16 | 362 | 82  | 40.2 | 82  | 81.592 | 3319 | 92.116 | 92.57668 |
| 436.22 | -2.15 | -1.03 | 40.2 | 32 | 16 | 408 | 106 | 40.2 | 106 | 105.47 | 3321 | 92.1   | 92.56048 |
| 436.38 | -2.17 | -1.03 | 40.3 | 26 | 14 | 412 | 84  | 40.3 | 84  | 83.582 | 3323 | 92.083 | 92.5433  |
| 436.75 | -2.19 | -1.03 | 40.3 | 26 | 20 | 390 | 86  | 40.3 | 86  | 85.572 | 3325 | 92.065 | 92.52543 |
| 436.95 | -2.21 | -1.03 | 40.3 | 30 | 18 | 406 | 92  | 40.3 | 92  | 91.542 | 3327 | 92.047 | 92.50748 |
| 437.13 | -2.24 | -1.03 | 40.3 | 30 | 14 | 380 | 102 | 40.3 | 102 | 101.49 | 3329 | 92.03  | 92.49    |
| 437.48 | -2.26 | -1.03 | 40.3 | 26 | 12 | 400 | 106 | 40.3 | 106 | 105.47 | 3331 | 92.013 | 92.47344 |
| 437.65 | -2.28 | -1.03 | 40.4 | 32 | 20 | 396 | 92  | 40.4 | 92  | 91.542 | 3332 | 91.998 | 92.45798 |
| 437.98 | -2.31 | -1.03 | 40.4 | 30 | 24 | 402 | 102 | 40.4 | 102 | 101.49 | 3334 | 91.984 | 92.4436  |
| 438.21 | -2.33 | -1.03 | 40.4 | 24 | 22 | 402 | 84  | 40.4 | 84  | 83.582 | 3336 | 91.97  | 92.43008 |
| 438.4  | -2.35 | -1.03 | 40.4 | 28 | 12 | 364 | 92  | 40.4 | 92  | 91.542 | 3338 | 91.957 | 92.41724 |
| 438.72 | -2.37 | -1.03 | 40.4 | 36 | 24 | 382 | 102 | 40.4 | 102 | 101.49 | 3340 | 91.945 | 92.40494 |
| 439.01 | -2.39 | -1.03 | 40.5 | 30 | 20 | 372 | 90  | 40.5 | 90  | 89.552 | 3342 | 91.933 | 92.39316 |
| 439.37 | -2.41 | -1.03 | 40.5 | 20 | 24 | 376 | 104 | 40.5 | 104 | 103.48 | 3344 | 91.922 | 92.38187 |
| 439.64 | -2.43 | -1.03 | 40.5 | 16 | 24 | 390 | 108 | 40.5 | 108 | 107.46 | 3346 | 91.911 | 92.37094 |
| 439.86 | -2.45 | -1.03 | 40.5 | 20 | 14 | 384 | 98  | 40.5 | 98  | 97.512 | 3348 | 91.901 | 92.36007 |
| 440.2  | -2.47 | -1.03 | 40.5 | 30 | 22 | 372 | 80  | 40.5 | 80  | 79.602 | 3350 | 91.89  | 92.34898 |
| 440.39 | -2.49 | -1.03 | 40.6 | 30 | 36 | 378 | 118 | 40.6 | 118 | 117.41 | 3352 | 91.878 | 92.33733 |
| 440.61 | -2.51 | -1.03 | 40.6 | 22 | 22 | 396 | 96  | 40.6 | 96  | 95.522 | 3354 | 91.866 | 92.32494 |
| 440.88 | -2.52 | -1.03 | 40.6 | 30 | 20 | 374 | 94  | 40.6 | 94  | 93.532 | 3356 | 91.853 | 92.31187 |
| 441.06 | -2.54 | -1.03 | 40.6 | 14 | 38 | 390 | 108 | 40.6 | 108 | 107.46 | 3358 | 91.839 | 92.2984  |
| 441.42 | -2.55 | -1.03 | 40.6 | 26 | 34 | 388 | 88  | 40.6 | 88  | 87.562 | 3359 | 91.826 | 92.28487 |
| 441.58 | -2.57 | -1.03 | 40.7 | 24 | 32 | 376 | 92  | 40.7 | 92  | 91.542 | 3361 | 91.813 | 92.27161 |
| 441.81 | -2.58 | -1.03 | 40.7 | 18 | 30 | 376 | 116 | 40.7 | 116 | 115.42 | 3363 | 91.8   | 92.25872 |
| 442.1  | -2.59 | -1.03 | 40.7 | 26 | 36 | 332 | 98  | 40.7 | 98  | 97.512 | 3365 | 91.787 | 92.24622 |
| 442.36 | -2.6  | -1.03 | 40.7 | 20 | 36 | 362 | 92  | 40.7 | 92  | 91.542 | 3367 | 91.775 | 92.23413 |
| 442.78 | -2.6  | -1.03 | 40.7 | 22 | 32 | 414 | 98  | 40.7 | 98  | 97.512 | 3369 | 91.764 | 92.22253 |
| 442.99 | -2.61 | -1.03 | 40.8 | 24 | 40 | 358 | 88  | 40.8 | 88  | 87.562 | 3371 | 91.753 | 92.21178 |
| 443.25 | -2.62 | -1.03 | 40.8 | 20 | 42 | 344 | 100 | 40.8 | 100 | 99.502 | 3373 | 91.744 | 92.20236 |
| 443.57 | -2.63 | -1.03 | 40.8 | 24 | 46 | 378 | 82  | 40.8 | 82  | 81.592 | 3375 | 91.736 | 92.19466 |
| 443.73 | -2.64 | -1.03 | 40.8 | 24 | 44 | 354 | 86  | 40.8 | 86  | 85.572 | 3377 | 91.73  | 92.18886 |
| 444.02 | -2.64 | -1.03 | 40.8 | 36 | 62 | 360 | 78  | 40.8 | 78  | 77.612 | 3379 | 91.726 | 92.18477 |
| 444.24 | -2.65 | -1.03 | 40.9 | 22 | 50 | 384 | 84  | 40.9 | 84  | 83.582 | 3381 | 91.723 | 92.18178 |
| 444.45 | -2.66 | -1.03 | 40.9 | 20 | 64 | 386 | 88  | 40.9 | 88  | 87.562 | 3383 | 91.721 | 92.17919 |
| 444.78 | -2.66 | -1.03 | 40.9 | 30 | 68 | 326 | 84  | 40.9 | 84  | 83.582 | 3385 | 91.718 | 92.17639 |
| 444.93 | -2.67 | -1.03 | 40.9 | 24 | 60 | 376 | 92  | 40.9 | 92  | 91.542 | 3386 | 91.715 | 92.1731  |
| 445.21 | -2.68 | -1.03 | 40.9 | 24 | 64 | 384 | 92  | 40.9 | 92  | 91.542 | 3388 | 91.711 | 92.16956 |

|        |       |       |      |    |     |     |     |      |     |        |      |        |          |
|--------|-------|-------|------|----|-----|-----|-----|------|-----|--------|------|--------|----------|
| 445.44 | -2.69 | -1.03 | 41   | 26 | 66  | 392 | 116 | 41   | 116 | 115.42 | 3390 | 91.708 | 92.16619 |
| 445.7  | -2.7  | -1.03 | 41   | 26 | 70  | 372 | 92  | 41   | 92  | 91.542 | 3392 | 91.705 | 92.16351 |
| 446.14 | -2.7  | -1.03 | 41   | 26 | 64  | 376 | 94  | 41   | 94  | 93.532 | 3394 | 91.703 | 92.16174 |
| 446.32 | -2.71 | -1.03 | 41   | 24 | 50  | 392 | 86  | 41   | 86  | 85.572 | 3396 | 91.702 | 92.16073 |
| 446.63 | -2.72 | -1.03 | 41   | 28 | 70  | 358 | 86  | 41   | 86  | 85.572 | 3398 | 91.702 | 92.16006 |
| 446.91 | -2.74 | -1.03 | 41.1 | 22 | 50  | 388 | 80  | 41.1 | 80  | 79.602 | 3400 | 91.701 | 92.15931 |
| 447.08 | -2.75 | -1.03 | 41.1 | 32 | 54  | 382 | 72  | 41.1 | 72  | 71.642 | 3402 | 91.7   | 92.1582  |
| 447.41 | -2.76 | -1.03 | 41.1 | 20 | 46  | 370 | 104 | 41.1 | 104 | 103.48 | 3404 | 91.698 | 92.15698 |
| 447.57 | -2.77 | -1.03 | 41.1 | 26 | 60  | 376 | 88  | 41.1 | 88  | 87.562 | 3406 | 91.698 | 92.15611 |
| 447.83 | -2.79 | -1.03 | 41.1 | 40 | 58  | 392 | 88  | 41.1 | 88  | 87.562 | 3408 | 91.698 | 92.15618 |
| 448.14 | -2.8  | -1.03 | 41.2 | 34 | 62  | 400 | 88  | 41.2 | 88  | 87.562 | 3410 | 91.699 | 92.15742 |
| 448.29 | -2.81 | -1.03 | 41.2 | 28 | 36  | 408 | 112 | 41.2 | 112 | 111.44 | 3412 | 91.701 | 92.1599  |
| 448.65 | -2.83 | -1.03 | 41.2 | 34 | 46  | 390 | 100 | 41.2 | 100 | 99.502 | 3413 | 91.705 | 92.16317 |
| 448.81 | -2.84 | -1.03 | 41.2 | 24 | 44  | 368 | 106 | 41.2 | 106 | 105.47 | 3415 | 91.708 | 92.16682 |
| 449.12 | -2.86 | -1.03 | 41.2 | 44 | 46  | 390 | 104 | 41.2 | 104 | 103.48 | 3417 | 91.712 | 92.1705  |
| 449.55 | -2.87 | -1.03 | 41.3 | 32 | 52  | 394 | 94  | 41.3 | 94  | 93.532 | 3419 | 91.716 | 92.17429 |
| 449.74 | -2.89 | -1.03 | 41.3 | 28 | 46  | 416 | 82  | 41.3 | 82  | 81.592 | 3421 | 91.72  | 92.17853 |
| 450.11 | -2.9  | -1.03 | 41.3 | 36 | 42  | 392 | 114 | 41.3 | 114 | 113.43 | 3423 | 91.725 | 92.1838  |
| 450.35 | -2.92 | -1.03 | 41.3 | 42 | 42  | 392 | 86  | 41.3 | 86  | 85.572 | 3425 | 91.732 | 92.19046 |
| 450.56 | -2.93 | -1.03 | 41.3 | 28 | 38  | 374 | 102 | 41.3 | 102 | 101.49 | 3427 | 91.74  | 92.19848 |
| 450.86 | -2.95 | -1.03 | 41.4 | 36 | 44  | 390 | 122 | 41.4 | 122 | 121.39 | 3429 | 91.749 | 92.20753 |
| 451.01 | -2.97 | -1.03 | 41.4 | 44 | 46  | 418 | 88  | 41.4 | 88  | 87.562 | 3431 | 91.758 | 92.21711 |
| 451.33 | -2.99 | -1.03 | 41.4 | 42 | 30  | 432 | 80  | 41.4 | 80  | 79.602 | 3433 | 91.768 | 92.22689 |
| 451.56 | -3.01 | -1.03 | 41.4 | 40 | 38  | 396 | 88  | 41.4 | 88  | 87.562 | 3435 | 91.778 | 92.23698 |
| 451.76 | -3.03 | -1.03 | 41.4 | 34 | 44  | 408 | 106 | 41.4 | 106 | 105.47 | 3437 | 91.789 | 92.24782 |
| 452.11 | -3.05 | -1.03 | 41.5 | 44 | 36  | 368 | 112 | 41.5 | 112 | 111.44 | 3439 | 91.801 | 92.2601  |
| 452.23 | -3.08 | -1.03 | 41.5 | 36 | 48  | 390 | 108 | 41.5 | 108 | 107.46 | 3440 | 91.815 | 92.2744  |
| 452.58 | -3.1  | -1.03 | 41.5 | 44 | 46  | 378 | 94  | 41.5 | 94  | 93.532 | 3442 | 91.832 | 92.29086 |
| 452.95 | -3.13 | -1.03 | 41.5 | 36 | 54  | 382 | 92  | 41.5 | 92  | 91.542 | 3444 | 91.85  | 92.30908 |
| 453.13 | -3.15 | -1.03 | 41.5 | 42 | 56  | 408 | 92  | 41.5 | 92  | 91.542 | 3446 | 91.869 | 92.32829 |
| 453.53 | -3.18 | -1.03 | 41.6 | 38 | 64  | 360 | 104 | 41.6 | 104 | 103.48 | 3448 | 91.888 | 92.34759 |
| 453.71 | -3.2  | -1.03 | 41.6 | 38 | 68  | 402 | 92  | 41.6 | 92  | 91.542 | 3450 | 91.907 | 92.36643 |
| 453.93 | -3.23 | -1.03 | 41.6 | 32 | 78  | 372 | 108 | 41.6 | 108 | 107.46 | 3452 | 91.925 | 92.38462 |
| 454.21 | -3.26 | -1.03 | 41.6 | 40 | 68  | 360 | 94  | 41.6 | 94  | 93.532 | 3454 | 91.943 | 92.40235 |
| 454.32 | -3.28 | -1.03 | 41.6 | 36 | 72  | 376 | 84  | 41.6 | 84  | 83.582 | 3456 | 91.96  | 92.41991 |
| 454.68 | -3.31 | -1.03 | 41.7 | 38 | 78  | 402 | 96  | 41.7 | 96  | 95.522 | 3458 | 91.978 | 92.43763 |
| 454.87 | -3.34 | -1.03 | 41.7 | 38 | 88  | 382 | 112 | 41.7 | 112 | 111.44 | 3460 | 91.996 | 92.45556 |
| 455.07 | -3.37 | -1.03 | 41.7 | 34 | 94  | 402 | 96  | 41.7 | 96  | 95.522 | 3462 | 92.014 | 92.47376 |
| 455.38 | -3.39 | -1.03 | 41.7 | 38 | 102 | 396 | 102 | 41.7 | 102 | 101.49 | 3464 | 92.032 | 92.49232 |
| 455.5  | -3.42 | -1.03 | 41.7 | 28 | 100 | 380 | 102 | 41.7 | 102 | 101.49 | 3466 | 92.051 | 92.51161 |
| 455.85 | -3.45 | -1.03 | 41.8 | 32 | 150 | 388 | 100 | 41.8 | 100 | 99.502 | 3467 | 92.072 | 92.53212 |
| 456.18 | -3.48 | -1.03 | 41.8 | 32 | 144 | 372 | 104 | 41.8 | 104 | 103.48 | 3469 | 92.094 | 92.55439 |
| 456.39 | -3.51 | -1.03 | 41.8 | 32 | 132 | 384 | 116 | 41.8 | 116 | 115.42 | 3471 | 92.118 | 92.57868 |
| 456.76 | -3.54 | -1.03 | 41.8 | 26 | 136 | 352 | 82  | 41.8 | 82  | 81.592 | 3473 | 92.144 | 92.60485 |
| 456.92 | -3.57 | -1.03 | 41.8 | 28 | 130 | 390 | 88  | 41.8 | 88  | 87.562 | 3475 | 92.172 | 92.63245 |
| 457.18 | -3.6  | -1.03 | 41.9 | 32 | 150 | 376 | 86  | 41.9 | 86  | 85.572 | 3477 | 92.2   | 92.6608  |
| 457.42 | -3.63 | -1.03 | 41.9 | 26 | 148 | 364 | 98  | 41.9 | 98  | 97.512 | 3479 | 92.228 | 92.68938 |

|        |       |       |      |    |     |     |     |      |     |        |      |        |          |
|--------|-------|-------|------|----|-----|-----|-----|------|-----|--------|------|--------|----------|
| 457.53 | -3.66 | -1.03 | 41.9 | 28 | 138 | 362 | 114 | 41.9 | 114 | 113.43 | 3481 | 92.257 | 92.71805 |
| 457.89 | -3.7  | -1.03 | 41.9 | 22 | 140 | 386 | 118 | 41.9 | 118 | 117.41 | 3483 | 92.286 | 92.74712 |
| 458.05 | -3.73 | -1.03 | 41.9 | 26 | 126 | 386 | 88  | 41.9 | 88  | 87.562 | 3485 | 92.315 | 92.77702 |
| 458.3  | -3.76 | -1.03 | 42   | 26 | 122 | 350 | 108 | 42   | 108 | 107.46 | 3487 | 92.346 | 92.80807 |
| 458.55 | -3.8  | -1.03 | 42   | 28 | 130 | 388 | 84  | 42   | 84  | 83.582 | 3489 | 92.378 | 92.84037 |
| 458.68 | -3.83 | -1.03 | 42   | 12 | 108 | 380 | 90  | 42   | 90  | 89.552 | 3491 | 92.411 | 92.87354 |
| 459.06 | -3.86 | -1.03 | 42   | 16 | 86  | 358 | 104 | 42   | 104 | 103.48 | 3493 | 92.445 | 92.90715 |
| 459.32 | -3.89 | -1.03 | 42   | 22 | 90  | 402 | 112 | 42   | 112 | 111.44 | 3494 | 92.479 | 92.94099 |
| 459.59 | -3.93 | -1.03 | 42.1 | 22 | 74  | 418 | 108 | 42.1 | 108 | 107.46 | 3496 | 92.513 | 92.97525 |
| 459.92 | -3.96 | -1.03 | 42.1 | 34 | 78  | 372 | 90  | 42.1 | 90  | 89.552 | 3498 | 92.548 | 93.01059 |
| 460.08 | -3.99 | -1.03 | 42.1 | 32 | 54  | 352 | 112 | 42.1 | 112 | 111.44 | 3500 | 92.585 | 93.04789 |
| 460.4  | -4.02 | -1.03 | 42.1 | 22 | 66  | 342 | 118 | 42.1 | 118 | 117.41 | 3502 | 92.625 | 93.08767 |
| 460.57 | -4.05 | -1.03 | 42.1 | 20 | 68  | 350 | 86  | 42.1 | 86  | 85.572 | 3504 | 92.667 | 93.12996 |
| 460.74 | -4.08 | -1.03 | 42.2 | 24 | 48  | 332 | 100 | 42.2 | 100 | 99.502 | 3506 | 92.71  | 93.17393 |
| 461.08 | -4.11 | -1.03 | 42.2 | 16 | 44  | 366 | 100 | 42.2 | 100 | 99.502 | 3508 | 92.755 | 93.21839 |
| 461.23 | -4.14 | -1.03 | 42.2 | 26 | 42  | 360 | 96  | 42.2 | 96  | 95.522 | 3510 | 92.798 | 93.26225 |
| 461.53 | -4.17 | -1.03 | 42.2 | 18 | 46  | 346 | 84  | 42.2 | 84  | 83.582 | 3512 | 92.841 | 93.30504 |
| 461.75 | -4.2  | -1.03 | 42.2 | 30 | 34  | 378 | 118 | 42.2 | 118 | 117.41 | 3514 | 92.883 | 93.34702 |
| 461.9  | -4.23 | -1.03 | 42.3 | 26 | 38  | 356 | 108 | 42.3 | 108 | 107.46 | 3516 | 92.924 | 93.38907 |
| 462.25 | -4.26 | -1.03 | 42.3 | 26 | 40  | 360 | 88  | 42.3 | 88  | 87.562 | 3518 | 92.967 | 93.43215 |
| 462.51 | -4.28 | -1.03 | 42.3 | 26 | 30  | 378 | 110 | 42.3 | 110 | 109.45 | 3520 | 93.012 | 93.47702 |
| 462.83 | -4.31 | -1.03 | 42.3 | 22 | 22  | 398 | 122 | 42.3 | 122 | 121.39 | 3521 | 93.059 | 93.52383 |
| 463.12 | -4.34 | -1.03 | 42.3 | 18 | 38  | 378 | 120 | 42.3 | 120 | 119.4  | 3523 | 93.107 | 93.57213 |
| 463.31 | -4.37 | -1.03 | 42.4 | 26 | 38  | 348 | 106 | 42.4 | 106 | 105.47 | 3525 | 93.155 | 93.62095 |
| 463.66 | -4.4  | -1.03 | 42.4 | 20 | 34  | 350 | 118 | 42.4 | 118 | 117.41 | 3527 | 93.203 | 93.6694  |
| 463.81 | -4.43 | -1.03 | 42.4 | 22 | 28  | 398 | 108 | 42.4 | 108 | 107.46 | 3529 | 93.251 | 93.71675 |
| 464.02 | -4.47 | -1.03 | 42.4 | 24 | 34  | 374 | 108 | 42.4 | 108 | 107.46 | 3531 | 93.296 | 93.7629  |
| 464.32 | -4.5  | -1.03 | 42.4 | 28 | 26  | 378 | 114 | 42.4 | 114 | 113.43 | 3533 | 93.341 | 93.80793 |
| 464.46 | -4.53 | -1.03 | 42.5 | 20 | 20  | 398 | 108 | 42.5 | 108 | 107.46 | 3535 | 93.385 | 93.85231 |
| 464.82 | -4.56 | -1.03 | 42.5 | 22 | 18  | 386 | 114 | 42.5 | 114 | 113.43 | 3537 | 93.429 | 93.89647 |
| 464.99 | -4.59 | -1.03 | 42.5 | 34 | 22  | 426 | 128 | 42.5 | 128 | 127.36 | 3539 | 93.474 | 93.94087 |
| 465.2  | -4.62 | -1.03 | 42.5 | 20 | 16  | 354 | 110 | 42.5 | 110 | 109.45 | 3541 | 93.518 | 93.98595 |
| 465.48 | -4.65 | -1.03 | 42.5 | 18 | 14  | 356 | 112 | 42.5 | 112 | 111.44 | 3543 | 93.564 | 94.03221 |
| 465.73 | -4.68 | -1.03 | 42.6 | 18 | 16  | 380 | 104 | 42.6 | 104 | 103.48 | 3545 | 93.612 | 94.07979 |
| 466.12 | -4.71 | -1.03 | 42.6 | 18 | 18  | 370 | 122 | 42.6 | 122 | 121.39 | 3547 | 93.66  | 94.12843 |
| 466.34 | -4.74 | -1.03 | 42.6 | 20 | 26  | 368 | 112 | 42.6 | 112 | 111.44 | 3548 | 93.709 | 94.17717 |
| 466.58 | -4.77 | -1.03 | 42.6 | 16 | 20  | 368 | 128 | 42.6 | 128 | 127.36 | 3550 | 93.756 | 94.22456 |
| 466.88 | -4.8  | -1.03 | 42.6 | 24 | 30  | 352 | 160 | 42.6 | 160 | 159.2  | 3552 | 93.8   | 94.26925 |
| 467.05 | -4.83 | -1.03 | 42.7 | 24 | 30  | 336 | 146 | 42.7 | 146 | 145.27 | 3554 | 93.841 | 94.31063 |
| 467.3  | -4.85 | -1.03 | 42.7 | 24 | 14  | 340 | 142 | 42.7 | 142 | 141.29 | 3556 | 93.88  | 94.34906 |
| 467.53 | -4.88 | -1.03 | 42.7 | 24 | 18  | 404 | 132 | 42.7 | 132 | 131.34 | 3558 | 93.917 | 94.38608 |
| 467.74 | -4.91 | -1.03 | 42.7 | 22 | 20  | 356 | 126 | 42.7 | 126 | 125.37 | 3560 | 93.954 | 94.42414 |
| 468.07 | -4.93 | -1.03 | 42.7 | 18 | 16  | 354 | 154 | 42.7 | 154 | 153.23 | 3562 | 93.996 | 94.46597 |
| 468.21 | -4.96 | -1.03 | 42.8 | 20 | 20  | 354 | 136 | 42.8 | 136 | 135.32 | 3564 | 94.043 | 94.51355 |
| 468.48 | -4.98 | -1.03 | 42.8 | 20 | 16  | 386 | 172 | 42.8 | 172 | 171.14 | 3566 | 94.097 | 94.56702 |
| 468.69 | -5    | -1.03 | 42.8 | 22 | 16  | 352 | 142 | 42.8 | 142 | 141.29 | 3568 | 94.153 | 94.62414 |
| 468.96 | -5.03 | -1.03 | 42.8 | 16 | 20  | 386 | 130 | 42.8 | 130 | 129.35 | 3570 | 94.21  | 94.68128 |

|        |       |       |      |    |    |     |     |      |     |        |      |        |          |
|--------|-------|-------|------|----|----|-----|-----|------|-----|--------|------|--------|----------|
| 469.39 | -5.05 | -1.03 | 42.8 | 24 | 20 | 370 | 164 | 42.8 | 164 | 163.18 | 3572 | 94.264 | 94.7351  |
| 469.56 | -5.07 | -1.03 | 42.9 | 30 | 16 | 370 | 162 | 42.9 | 162 | 161.19 | 3574 | 94.312 | 94.78396 |
| 469.85 | -5.09 | -1.03 | 42.9 | 20 | 18 | 340 | 190 | 42.9 | 190 | 189.05 | 3575 | 94.356 | 94.82807 |
| 470.13 | -5.12 | -1.03 | 42.9 | 20 | 20 | 378 | 170 | 42.9 | 170 | 169.15 | 3577 | 94.397 | 94.86888 |
| 470.28 | -5.14 | -1.03 | 42.9 | 24 | 20 | 380 | 168 | 42.9 | 168 | 167.16 | 3579 | 94.436 | 94.90824 |
| 470.6  | -5.16 | -1.03 | 42.9 | 26 | 16 | 408 | 188 | 42.9 | 188 | 187.06 | 3581 | 94.475 | 94.94783 |
| 470.76 | -5.18 | -1.03 | 43   | 18 | 24 | 390 | 196 | 43   | 196 | 195.02 | 3583 | 94.516 | 94.98875 |
| 471.01 | -5.2  | -1.03 | 43   | 24 | 12 | 364 | 222 | 43   | 222 | 220.9  | 3585 | 94.559 | 95.03141 |
| 471.3  | -5.22 | -1.03 | 43   | 20 | 8  | 368 | 216 | 43   | 216 | 214.93 | 3587 | 94.603 | 95.07569 |
| 471.45 | -5.24 | -1.03 | 43   | 20 | 18 | 432 | 226 | 43   | 226 | 224.88 | 3589 | 94.648 | 95.12135 |
| 471.77 | -5.25 | -1.03 | 43   | 14 | 12 | 352 | 254 | 43   | 254 | 252.74 | 3591 | 94.695 | 95.16804 |
| 471.93 | -5.27 | -1.03 | 43.1 | 32 | 24 | 360 | 254 | 43.1 | 254 | 252.74 | 3593 | 94.742 | 95.21565 |
| 472.21 | -5.29 | -1.03 | 43.1 | 20 | 20 | 398 | 274 | 43.1 | 274 | 272.64 | 3595 | 94.79  | 95.26375 |
| 472.62 | -5.3  | -1.03 | 43.1 | 26 | 12 | 342 | 312 | 43.1 | 312 | 310.45 | 3597 | 94.838 | 95.31179 |
| 472.81 | -5.32 | -1.03 | 43.1 | 26 | 20 | 360 | 364 | 43.1 | 364 | 362.19 | 3599 | 94.884 | 95.35872 |
| 473.13 | -5.33 | -1.03 | 43.1 | 20 | 14 | 366 | 370 | 43.1 | 370 | 368.16 | 3601 | 94.929 | 95.40356 |
| 473.37 | -5.35 | -1.03 | 43.2 | 20 | 12 | 394 | 428 | 43.2 | 428 | 425.87 | 3602 | 94.971 | 95.44564 |
| 473.56 | -5.37 | -1.03 | 43.2 | 16 | 18 | 384 | 460 | 43.2 | 460 | 457.71 | 3604 | 95.01  | 95.48514 |
| 473.86 | -5.38 | -1.03 | 43.2 | 22 | 10 | 368 | 494 | 43.2 | 494 | 491.54 | 3606 | 95.048 | 95.52295 |
| 474.01 | -5.4  | -1.03 | 43.2 | 16 | 10 | 386 | 526 | 43.2 | 526 | 523.38 | 3608 | 95.085 | 95.56054 |
| 474.29 | -5.41 | -1.03 | 43.2 | 14 | 8  | 374 | 544 | 43.2 | 544 | 541.29 | 3610 | 95.124 | 95.59937 |
| 474.54 | -5.42 | -1.03 | 43.3 | 24 | 10 | 350 | 644 | 43.3 | 644 | 640.8  | 3612 | 95.164 | 95.6402  |
| 474.69 | -5.44 | -1.03 | 43.3 | 18 | 12 | 410 | 606 | 43.3 | 606 | 602.99 | 3614 | 95.206 | 95.68247 |
| 475.05 | -5.45 | -1.03 | 43.3 | 22 | 12 | 376 | 664 | 43.3 | 664 | 660.7  | 3616 | 95.248 | 95.72467 |
| 475.16 | -5.46 | -1.03 | 43.3 | 20 | 10 | 372 | 610 | 43.3 | 610 | 606.97 | 3618 | 95.289 | 95.7652  |
| 475.46 | -5.47 | -1.03 | 43.3 | 20 | 16 | 388 | 586 | 43.3 | 586 | 583.08 | 3620 | 95.327 | 95.80331 |
| 475.85 | -5.49 | -1.03 | 43.4 | 26 | 22 | 394 | 614 | 43.4 | 614 | 610.95 | 3622 | 95.363 | 95.83951 |
| 476.02 | -5.5  | -1.03 | 43.4 | 16 | 16 | 344 | 618 | 43.4 | 618 | 614.93 | 3624 | 95.399 | 95.87553 |
| 476.41 | -5.51 | -1.03 | 43.4 | 20 | 12 | 374 | 516 | 43.4 | 516 | 513.43 | 3626 | 95.436 | 95.91305 |
| 476.57 | -5.52 | -1.03 | 43.4 | 18 | 16 | 372 | 516 | 43.4 | 516 | 513.43 | 3628 | 95.476 | 95.95304 |
| 476.79 | -5.53 | -1.03 | 43.4 | 22 | 8  | 338 | 490 | 43.4 | 490 | 487.56 | 3629 | 95.517 | 95.9948  |
| 477.09 | -5.54 | -1.03 | 43.5 | 18 | 18 | 386 | 488 | 43.5 | 488 | 485.57 | 3631 | 95.559 | 96.03634 |
| 477.19 | -5.55 | -1.03 | 43.5 | 18 | 10 | 340 | 426 | 43.5 | 426 | 423.88 | 3633 | 95.597 | 96.07514 |
| 477.52 | -5.56 | -1.03 | 43.5 | 20 | 14 | 350 | 394 | 43.5 | 394 | 392.04 | 3635 | 95.631 | 96.10948 |
| 477.72 | -5.57 | -1.03 | 43.5 | 18 | 10 | 388 | 358 | 43.5 | 358 | 356.22 | 3637 | 95.66  | 96.13869 |
| 477.91 | -5.58 | -1.03 | 43.5 | 20 | 12 | 414 | 354 | 43.5 | 354 | 352.24 | 3639 | 95.685 | 96.16341 |
| 478.22 | -5.59 | -1.03 | 43.6 | 20 | 16 | 356 | 308 | 43.6 | 308 | 306.47 | 3641 | 95.706 | 96.18486 |
| 478.33 | -5.61 | -1.03 | 43.6 | 26 | 8  | 340 | 296 | 43.6 | 296 | 294.53 | 3643 | 95.726 | 96.20486 |
| 478.65 | -5.62 | -1.03 | 43.6 | 20 | 14 | 404 | 296 | 43.6 | 296 | 294.53 | 3645 | 95.747 | 96.22527 |
| 478.97 | -5.63 | -1.03 | 43.6 | 26 | 10 | 342 | 234 | 43.6 | 234 | 232.84 | 3647 | 95.769 | 96.24776 |
| 479.18 | -5.64 | -1.03 | 43.6 | 16 | 8  | 350 | 212 | 43.6 | 212 | 210.95 | 3649 | 95.794 | 96.27314 |
| 479.56 | -5.65 | -1.03 | 43.7 | 26 | 14 | 372 | 228 | 43.7 | 228 | 226.87 | 3651 | 95.822 | 96.30065 |
| 479.72 | -5.66 | -1.03 | 43.7 | 16 | 14 | 344 | 202 | 43.7 | 202 | 201    | 3653 | 95.849 | 96.32812 |
| 479.96 | -5.68 | -1.03 | 43.7 | 20 | 12 | 362 | 202 | 43.7 | 202 | 201    | 3655 | 95.874 | 96.35329 |
| 480.22 | -5.69 | -1.03 | 43.7 | 24 | 8  | 404 | 186 | 43.7 | 186 | 185.07 | 3656 | 95.895 | 96.37456 |
| 480.32 | -5.7  | -1.03 | 43.7 | 20 | 10 | 364 | 198 | 43.7 | 198 | 197.01 | 3658 | 95.912 | 96.39149 |
| 480.67 | -5.72 | -1.03 | 43.8 | 18 | 20 | 392 | 188 | 43.8 | 188 | 187.06 | 3660 | 95.924 | 96.40401 |

|        |       |       |      |    |    |     |     |      |     |        |      |        |          |
|--------|-------|-------|------|----|----|-----|-----|------|-----|--------|------|--------|----------|
| 480.84 | -5.74 | -1.03 | 43.8 | 24 | 12 | 366 | 150 | 43.8 | 150 | 149.25 | 3662 | 95.933 | 96.41241 |
| 481.06 | -5.75 | -1.03 | 43.8 | 26 | 14 | 352 | 152 | 43.8 | 152 | 151.24 | 3664 | 95.937 | 96.41686 |
| 481.35 | -5.77 | -1.03 | 43.8 | 14 | 10 | 362 | 186 | 43.8 | 186 | 185.07 | 3666 | 95.938 | 96.41792 |
| 481.47 | -5.78 | -1.03 | 43.8 | 16 | 14 | 398 | 134 | 43.8 | 134 | 133.33 | 3668 | 95.937 | 96.41659 |
| 481.8  | -5.8  | -1.03 | 43.9 | 26 | 12 | 350 | 142 | 43.9 | 142 | 141.29 | 3670 | 95.935 | 96.41466 |
| 482.09 | -5.82 | -1.03 | 43.9 | 12 | 10 | 346 | 112 | 43.9 | 112 | 111.44 | 3672 | 95.934 | 96.41415 |
| 482.36 | -5.83 | -1.03 | 43.9 | 20 | 10 | 366 | 120 | 43.9 | 120 | 119.4  | 3674 | 95.937 | 96.41658 |
| 482.68 | -5.85 | -1.03 | 43.9 | 26 | 14 | 358 | 116 | 43.9 | 116 | 115.42 | 3676 | 95.942 | 96.42163 |
| 482.85 | -5.87 | -1.03 | 43.9 | 28 | 10 | 350 | 108 | 43.9 | 108 | 107.46 | 3678 | 95.948 | 96.42737 |
| 483.16 | -5.89 | -1.03 | 44   | 22 | 8  | 368 | 104 | 44   | 104 | 103.48 | 3680 | 95.952 | 96.43131 |
| 483.36 | -5.91 | -1.03 | 44   | 22 | 14 | 356 | 106 | 44   | 106 | 105.47 | 3682 | 95.952 | 96.43173 |
| 483.51 | -5.93 | -1.03 | 44   | 20 | 12 | 348 | 96  | 44   | 96  | 95.522 | 3683 | 95.948 | 96.42809 |
| 483.82 | -5.95 | -1.03 | 44   | 24 | 18 | 378 | 102 | 44   | 102 | 101.49 | 3685 | 95.941 | 96.42108 |
| 483.97 | -5.96 | -1.03 | 44   | 16 | 8  | 360 | 126 | 44   | 126 | 125.37 | 3687 | 95.933 | 96.41217 |
| 484.27 | -5.98 | -1.03 | 44.1 | 16 | 10 | 390 | 126 | 44.1 | 126 | 125.37 | 3689 | 95.924 | 96.40343 |
| 484.48 | -6    | -1.03 | 44.1 | 24 | 20 | 342 | 110 | 44.1 | 110 | 109.45 | 3691 | 95.917 | 96.39663 |
| 484.64 | -6.02 | -1.03 | 44.1 | 18 | 12 | 366 | 112 | 44.1 | 112 | 111.44 | 3693 | 95.913 | 96.39278 |
| 484.95 | -6.04 | -1.03 | 44.1 | 12 | 6  | 364 | 118 | 44.1 | 118 | 117.41 | 3695 | 95.912 | 96.39166 |
| 485.2  | -6.05 | -1.03 | 44.1 | 16 | 10 | 326 | 90  | 44.1 | 90  | 89.552 | 3697 | 95.913 | 96.39237 |
| 485.55 | -6.07 | -1.03 | 44.2 | 28 | 8  | 316 | 110 | 44.2 | 110 | 109.45 | 3699 | 95.914 | 96.39369 |
| 485.81 | -6.09 | -1.03 | 44.2 | 18 | 12 | 378 | 120 | 44.2 | 120 | 119.4  | 3701 | 95.915 | 96.39473 |
| 486    | -6.11 | -1.03 | 44.2 | 18 | 10 | 396 | 108 | 44.2 | 108 | 107.46 | 3703 | 95.915 | 96.39507 |
| 486.34 | -6.13 | -1.03 | 44.2 | 24 | 10 | 340 | 120 | 44.2 | 120 | 119.4  | 3705 | 95.915 | 96.39483 |
| 486.49 | -6.15 | -1.03 | 44.2 | 16 | 10 | 346 | 118 | 44.2 | 118 | 117.41 | 3707 | 95.915 | 96.39443 |
| 486.69 | -6.17 | -1.03 | 44.3 | 22 | 8  | 344 | 106 | 44.3 | 106 | 105.47 | 3709 | 95.915 | 96.39453 |
| 486.97 | -6.19 | -1.03 | 44.3 | 14 | 12 | 368 | 124 | 44.3 | 124 | 123.38 | 3710 | 95.916 | 96.39539 |
| 487.14 | -6.2  | -1.03 | 44.3 | 22 | 14 | 334 | 106 | 44.3 | 106 | 105.47 | 3712 | 95.918 | 96.39715 |
| 487.48 | -6.22 | -1.03 | 44.3 | 16 | 12 | 320 | 102 | 44.3 | 102 | 101.49 | 3714 | 95.92  | 96.39934 |
| 487.65 | -6.24 | -1.03 | 44.3 | 14 | 12 | 364 | 102 | 44.3 | 102 | 101.49 | 3716 | 95.922 | 96.40145 |
| 487.85 | -6.26 | -1.03 | 44.4 | 26 | 16 | 342 | 92  | 44.4 | 92  | 91.542 | 3718 | 95.923 | 96.40293 |
| 488.13 | -6.28 | -1.03 | 44.4 | 24 | 6  | 380 | 98  | 44.4 | 98  | 97.512 | 3720 | 95.924 | 96.40349 |
| 488.36 | -6.3  | -1.03 | 44.4 | 28 | 12 | 382 | 96  | 44.4 | 96  | 95.522 | 3722 | 95.923 | 96.40304 |
| 488.77 | -6.32 | -1.03 | 44.4 | 14 | 10 | 342 | 80  | 44.4 | 80  | 79.602 | 3724 | 95.922 | 96.40168 |
| 489    | -6.35 | -1.03 | 44.4 | 28 | 8  | 380 | 106 | 44.4 | 106 | 105.47 | 3726 | 95.92  | 96.39967 |
| 489.22 | -6.36 | -1.03 | 44.5 | 18 | 16 | 344 | 128 | 44.5 | 128 | 127.36 | 3728 | 95.918 | 96.39748 |
| 489.54 | -6.38 | -1.03 | 44.5 | 18 | 10 | 388 | 90  | 44.5 | 90  | 89.552 | 3730 | 95.916 | 96.3956  |
| 489.71 | -6.4  | -1.03 | 44.5 | 26 | 10 | 354 | 108 | 44.5 | 108 | 107.46 | 3732 | 95.915 | 96.39445 |
| 489.98 | -6.42 | -1.03 | 44.5 | 18 | 10 | 328 | 96  | 44.5 | 96  | 95.522 | 3734 | 95.915 | 96.39419 |
| 490.18 | -6.45 | -1.03 | 44.5 | 28 | 12 | 386 | 108 | 44.5 | 108 | 107.46 | 3736 | 95.915 | 96.39463 |
| 490.4  | -6.47 | -1.03 | 44.6 | 24 | 12 | 380 | 108 | 44.6 | 108 | 107.46 | 3737 | 95.916 | 96.39512 |
| 490.74 | -6.49 | -1.03 | 44.6 | 30 | 10 | 388 | 114 | 44.6 | 114 | 113.43 | 3739 | 95.916 | 96.39508 |
| 490.87 | -6.51 | -1.03 | 44.6 | 30 | 18 | 364 | 108 | 44.6 | 108 | 107.46 | 3741 | 95.915 | 96.3941  |
| 491.15 | -6.53 | -1.03 | 44.6 | 20 | 14 | 364 | 120 | 44.6 | 120 | 119.4  | 3743 | 95.913 | 96.39248 |
| 491.38 | -6.55 | -1.03 | 44.6 | 18 | 10 | 386 | 106 | 44.6 | 106 | 105.47 | 3745 | 95.912 | 96.3912  |
| 491.6  | -6.57 | -1.03 | 44.7 | 26 | 14 | 412 | 110 | 44.7 | 110 | 109.45 | 3747 | 95.912 | 96.39167 |
| 492.05 | -6.59 | -1.03 | 44.7 | 28 | 16 | 380 | 94  | 44.7 | 94  | 93.532 | 3749 | 95.915 | 96.39483 |
| 492.22 | -6.61 | -1.03 | 44.7 | 24 | 12 | 344 | 104 | 44.7 | 104 | 103.48 | 3751 | 95.921 | 96.40084 |

|        |       |       |      |    |    |     |     |      |     |        |      |        |          |
|--------|-------|-------|------|----|----|-----|-----|------|-----|--------|------|--------|----------|
| 492.52 | -6.63 | -1.03 | 44.7 | 30 | 10 | 374 | 102 | 44.7 | 102 | 101.49 | 3753 | 95.929 | 96.4085  |
| 492.8  | -6.65 | -1.03 | 44.7 | 30 | 16 | 336 | 98  | 44.7 | 98  | 97.512 | 3755 | 95.937 | 96.4163  |
| 492.96 | -6.66 | -1.03 | 44.8 | 18 | 16 | 368 | 102 | 44.8 | 102 | 101.49 | 3757 | 95.943 | 96.4228  |
| 493.29 | -6.68 | -1.03 | 44.8 | 18 | 10 | 350 | 98  | 44.8 | 98  | 97.512 | 3759 | 95.948 | 96.4273  |
| 493.42 | -6.7  | -1.03 | 44.8 | 22 | 8  | 360 | 106 | 44.8 | 106 | 105.47 | 3761 | 95.95  | 96.42984 |
| 493.66 | -6.72 | -1.03 | 44.8 | 26 | 8  | 378 | 108 | 44.8 | 108 | 107.46 | 3763 | 95.951 | 96.43095 |
| 493.97 | -6.73 | -1.03 | 44.8 | 16 | 12 | 342 | 94  | 44.8 | 94  | 93.532 | 3764 | 95.952 | 96.43126 |
| 494.11 | -6.75 | -1.03 | 44.9 | 32 | 12 | 352 | 92  | 44.9 | 92  | 91.542 | 3766 | 95.952 | 96.43139 |
| 494.45 | -6.76 | -1.03 | 44.9 | 24 | 14 | 370 | 72  | 44.9 | 72  | 71.642 | 3768 | 95.952 | 96.43151 |
| 494.61 | -6.78 | -1.03 | 44.9 | 24 | 16 | 390 | 110 | 44.9 | 110 | 109.45 | 3770 | 95.952 | 96.43154 |
| 494.84 | -6.79 | -1.03 | 44.9 | 22 | 10 | 394 | 96  | 44.9 | 96  | 95.522 | 3772 | 95.951 | 96.43099 |
| 495.28 | -6.81 | -1.03 | 44.9 | 18 | 16 | 356 | 86  | 44.9 | 86  | 85.572 | 3774 | 95.95  | 96.4294  |
| 495.46 | -6.83 | -1.03 | 45   | 18 | 10 | 402 | 100 | 45   | 100 | 99.502 | 3776 | 95.947 | 96.42662 |
| 495.8  | -6.84 | -1.03 | 45   | 22 | 14 | 350 | 84  | 45   | 84  | 83.582 | 3778 | 95.943 | 96.42283 |
| 496.04 | -6.86 | -1.03 | 45   | 22 | 12 | 364 | 116 | 45   | 116 | 115.42 | 3780 | 95.939 | 96.41857 |
| 496.21 | -6.88 | -1.03 | 45   | 14 | 6  | 374 | 76  | 45   | 76  | 75.622 | 3782 | 95.935 | 96.41461 |
| 496.56 | -6.89 | -1.03 | 45   | 20 | 6  | 358 | 90  | 45   | 90  | 89.552 | 3784 | 95.932 | 96.41138 |
| 496.65 | -6.91 | -1.03 | 45.1 | 32 | 12 | 416 | 96  | 45.1 | 96  | 95.522 | 3786 | 95.929 | 96.40906 |
| 496.94 | -6.93 | -1.03 | 45.1 | 24 | 12 | 404 | 90  | 45.1 | 90  | 89.552 | 3788 | 95.928 | 96.40716 |
| 497.21 | -6.96 | -1.03 | 45.1 | 18 | 12 | 358 | 88  | 45.1 | 88  | 87.562 | 3790 | 95.925 | 96.40495 |
| 497.36 | -6.98 | -1.03 | 45.1 | 32 | 16 | 364 | 100 | 45.1 | 100 | 99.502 | 3791 | 95.922 | 96.40148 |
| 497.72 | -7    | -1.03 | 45.1 | 24 | 10 | 346 | 98  | 45.1 | 98  | 97.512 | 3793 | 95.917 | 96.39611 |
| 497.85 | -7.03 | -1.03 | 45.2 | 24 | 10 | 354 | 112 | 45.2 | 112 | 111.44 | 3795 | 95.909 | 96.38863 |
| 498.09 | -7.05 | -1.03 | 45.2 | 20 | 16 | 396 | 88  | 45.2 | 88  | 87.562 | 3797 | 95.9   | 96.37968 |
| 498.5  | -7.08 | -1.03 | 45.2 | 24 | 14 | 338 | 84  | 45.2 | 84  | 83.582 | 3799 | 95.891 | 96.37074 |
| 498.68 | -7.11 | -1.03 | 45.2 | 20 | 16 | 378 | 112 | 45.2 | 112 | 111.44 | 3801 | 95.884 | 96.36379 |
| 499.05 | -7.14 | -1.03 | 45.2 | 28 | 10 | 346 | 102 | 45.2 | 102 | 101.49 | 3803 | 95.881 | 96.36035 |
| 499.26 | -7.17 | -1.03 | 45.3 | 22 | 8  | 366 | 98  | 45.3 | 98  | 97.512 | 3805 | 95.881 | 96.36053 |
| 499.47 | -7.2  | -1.03 | 45.3 | 28 | 14 | 354 | 100 | 45.3 | 100 | 99.502 | 3807 | 95.884 | 96.36294 |
| 499.78 | -7.23 | -1.03 | 45.3 | 22 | 8  | 354 | 96  | 45.3 | 96  | 95.522 | 3809 | 95.886 | 96.36553 |
| 499.89 | -7.26 | -1.03 | 45.3 | 28 | 12 | 350 | 90  | 45.3 | 90  | 89.552 | 3811 | 95.887 | 96.36654 |
| 500.22 | -7.29 | -1.03 | 45.3 | 26 | 10 | 358 | 76  | 45.3 | 76  | 75.622 | 3813 | 95.886 | 96.36494 |
| 500.43 | -7.32 | -1.03 | 45.4 | 22 | 12 | 346 | 106 | 45.4 | 106 | 105.47 | 3815 | 95.881 | 96.36042 |
| 500.62 | -7.35 | -1.03 | 45.4 | 18 | 16 | 340 | 96  | 45.4 | 96  | 95.522 | 3816 | 95.874 | 96.35365 |
| 500.95 | -7.39 | -1.03 | 45.4 | 32 | 10 | 414 | 92  | 45.4 | 92  | 91.542 | 3818 | 95.867 | 96.34595 |
| 501.07 | -7.42 | -1.03 | 45.4 | 28 | 14 | 388 | 106 | 45.4 | 106 | 105.47 | 3820 | 95.86  | 96.33918 |
| 501.35 | -7.45 | -1.03 | 45.4 | 28 | 10 | 394 | 106 | 45.4 | 106 | 105.47 | 3822 | 95.855 | 96.33441 |
| 501.69 | -7.48 | -1.03 | 45.5 | 30 | 20 | 376 | 78  | 45.5 | 78  | 77.612 | 3824 | 95.853 | 96.33176 |
| 501.93 | -7.5  | -1.03 | 45.5 | 16 | 14 | 340 | 90  | 45.5 | 90  | 89.552 | 3826 | 95.851 | 96.33021 |
| 502.3  | -7.53 | -1.03 | 45.5 | 14 | 10 | 378 | 110 | 45.5 | 110 | 109.45 | 3828 | 95.849 | 96.32844 |
| 502.48 | -7.56 | -1.03 | 45.5 | 28 | 14 | 384 | 98  | 45.5 | 98  | 97.512 | 3830 | 95.846 | 96.32522 |
| 502.76 | -7.59 | -1.03 | 45.5 | 14 | 20 | 366 | 88  | 45.5 | 88  | 87.562 | 3832 | 95.841 | 96.32007 |
| 503.02 | -7.61 | -1.03 | 45.6 | 24 | 12 | 390 | 106 | 45.6 | 106 | 105.47 | 3834 | 95.834 | 96.31318 |
| 503.13 | -7.63 | -1.03 | 45.6 | 22 | 12 | 336 | 98  | 45.6 | 98  | 97.512 | 3836 | 95.826 | 96.30552 |
| 503.49 | -7.66 | -1.03 | 45.6 | 18 | 18 | 376 | 80  | 45.6 | 80  | 79.602 | 3838 | 95.819 | 96.29834 |
| 503.65 | -7.68 | -1.03 | 45.6 | 16 | 16 | 362 | 102 | 45.6 | 102 | 101.49 | 3840 | 95.814 | 96.29265 |
| 503.89 | -7.69 | -1.03 | 45.6 | 34 | 10 | 334 | 88  | 45.6 | 88  | 87.562 | 3842 | 95.81  | 96.28857 |

|        |       |       |      |    |    |     |     |      |     |        |      |        |          |
|--------|-------|-------|------|----|----|-----|-----|------|-----|--------|------|--------|----------|
| 504.2  | -7.71 | -1.03 | 45.7 | 20 | 12 | 382 | 104 | 45.7 | 104 | 103.48 | 3843 | 95.806 | 96.2855  |
| 504.32 | -7.73 | -1.03 | 45.7 | 24 | 12 | 386 | 104 | 45.7 | 104 | 103.48 | 3845 | 95.804 | 96.28253 |
| 504.64 | -7.74 | -1.03 | 45.7 | 22 | 18 | 356 | 112 | 45.7 | 112 | 111.44 | 3847 | 95.8   | 96.27893 |
| 504.9  | -7.75 | -1.03 | 45.7 | 28 | 20 | 398 | 94  | 45.7 | 94  | 93.532 | 3849 | 95.795 | 96.27442 |
| 505.2  | -7.76 | -1.03 | 45.7 | 22 | 16 | 392 | 106 | 45.7 | 106 | 105.47 | 3851 | 95.79  | 96.26932 |
| 505.52 | -7.77 | -1.03 | 45.8 | 22 | 16 | 350 | 108 | 45.8 | 108 | 107.46 | 3853 | 95.785 | 96.26435 |
| 505.71 | -7.78 | -1.03 | 45.8 | 22 | 30 | 348 | 94  | 45.8 | 94  | 93.532 | 3855 | 95.781 | 96.26014 |
| 506.03 | -7.8  | -1.03 | 45.8 | 18 | 14 | 360 | 100 | 45.8 | 100 | 99.502 | 3857 | 95.778 | 96.25712 |
| 506.23 | -7.81 | -1.03 | 45.8 | 22 | 16 | 358 | 106 | 45.8 | 106 | 105.47 | 3859 | 95.776 | 96.25514 |
| 506.41 | -7.82 | -1.03 | 45.8 | 28 | 20 | 378 | 112 | 45.8 | 112 | 111.44 | 3861 | 95.775 | 96.25377 |
| 506.71 | -7.83 | -1.03 | 45.9 | 24 | 16 | 324 | 96  | 45.9 | 96  | 95.522 | 3863 | 95.774 | 96.25273 |
| 506.86 | -7.84 | -1.03 | 45.9 | 26 | 18 | 364 | 102 | 45.9 | 102 | 101.49 | 3865 | 95.773 | 96.25182 |
| 507.15 | -7.85 | -1.03 | 45.9 | 18 | 26 | 384 | 106 | 45.9 | 106 | 105.47 | 3867 | 95.772 | 96.25131 |
| 507.38 | -7.86 | -1.03 | 45.9 | 16 | 20 | 352 | 132 | 45.9 | 132 | 131.34 | 3869 | 95.773 | 96.2514  |
| 507.56 | -7.86 | -1.03 | 45.9 | 18 | 22 | 368 | 108 | 45.9 | 108 | 107.46 | 3870 | 95.773 | 96.25225 |
| 507.88 | -7.87 | -1.03 | 46   | 20 | 22 | 362 | 106 | 46   | 106 | 105.47 | 3872 | 95.775 | 96.25353 |
| 508.07 | -7.89 | -1.03 | 46   | 16 | 24 | 420 | 100 | 46   | 100 | 99.502 | 3874 | 95.776 | 96.25477 |
| 508.43 | -7.9  | -1.03 | 46   | 32 | 30 | 374 | 112 | 46   | 112 | 111.44 | 3876 | 95.776 | 96.25528 |
| 508.71 | -7.91 | -1.03 | 46   | 22 | 34 | 416 | 130 | 46   | 130 | 129.35 | 3878 | 95.776 | 96.2548  |
| 508.91 | -7.92 | -1.03 | 46   | 20 | 26 | 424 | 124 | 46   | 124 | 123.38 | 3880 | 95.774 | 96.25335 |
| 509.28 | -7.93 | -1.03 | 46.1 | 28 | 24 | 376 | 100 | 46.1 | 100 | 99.502 | 3882 | 95.773 | 96.25143 |
| 509.42 | -7.95 | -1.03 | 46.1 | 20 | 18 | 368 | 122 | 46.1 | 122 | 121.39 | 3884 | 95.771 | 96.24972 |
| 509.65 | -7.96 | -1.03 | 46.1 | 30 | 30 | 430 | 104 | 46.1 | 104 | 103.48 | 3886 | 95.77  | 96.24879 |
| 509.9  | -7.98 | -1.03 | 46.1 | 34 | 20 | 394 | 114 | 46.1 | 114 | 113.43 | 3888 | 95.77  | 96.24884 |
| 510.05 | -7.99 | -1.03 | 46.1 | 24 | 14 | 414 | 104 | 46.1 | 104 | 103.48 | 3890 | 95.771 | 96.24962 |
| 510.4  | -8.01 | -1.03 | 46.2 | 34 | 18 | 430 | 112 | 46.2 | 112 | 111.44 | 3892 | 95.772 | 96.25051 |
| 510.57 | -8.03 | -1.03 | 46.2 | 24 | 16 | 410 | 122 | 46.2 | 122 | 121.39 | 3894 | 95.772 | 96.25098 |
| 510.79 | -8.05 | -1.03 | 46.2 | 38 | 20 | 392 | 124 | 46.2 | 124 | 123.38 | 3896 | 95.772 | 96.25069 |
| 511.07 | -8.07 | -1.03 | 46.2 | 22 | 22 | 420 | 100 | 46.2 | 100 | 99.502 | 3897 | 95.771 | 96.2499  |
| 511.22 | -8.09 | -1.03 | 46.2 | 34 | 14 | 436 | 110 | 46.2 | 110 | 109.45 | 3899 | 95.77  | 96.24928 |
| 511.66 | -8.11 | -1.03 | 46.3 | 26 | 12 | 442 | 102 | 46.3 | 102 | 101.49 | 3901 | 95.771 | 96.24979 |
| 511.91 | -8.13 | -1.03 | 46.3 | 28 | 22 | 424 | 124 | 46.3 | 124 | 123.38 | 3903 | 95.773 | 96.25202 |
| 512.13 | -8.15 | -1.03 | 46.3 | 26 | 10 | 470 | 104 | 46.3 | 104 | 103.48 | 3905 | 95.777 | 96.25589 |
| 512.47 | -8.18 | -1.03 | 46.3 | 24 | 18 | 472 | 114 | 46.3 | 114 | 113.43 | 3907 | 95.782 | 96.26069 |
| 512.6  | -8.2  | -1.03 | 46.3 | 30 | 18 | 500 | 112 | 46.3 | 112 | 111.44 | 3909 | 95.787 | 96.26544 |
| 512.89 | -8.22 | -1.03 | 46.4 | 30 | 12 | 482 | 118 | 46.4 | 118 | 117.41 | 3911 | 95.79  | 96.26929 |
| 513.06 | -8.25 | -1.03 | 46.4 | 36 | 20 | 486 | 112 | 46.4 | 112 | 111.44 | 3913 | 95.793 | 96.27178 |
| 513.27 | -8.27 | -1.03 | 46.4 | 42 | 16 | 480 | 100 | 46.4 | 100 | 99.502 | 3915 | 95.794 | 96.27272 |
| 513.6  | -8.29 | -1.03 | 46.4 | 36 | 18 | 466 | 98  | 46.4 | 98  | 97.512 | 3917 | 95.793 | 96.27237 |
| 513.73 | -8.32 | -1.03 | 46.4 | 32 | 16 | 428 | 108 | 46.4 | 108 | 107.46 | 3919 | 95.792 | 96.2711  |
| 514.01 | -8.34 | -1.03 | 46.5 | 28 | 10 | 424 | 124 | 46.5 | 124 | 123.38 | 3921 | 95.791 | 96.26946 |
| 514.22 | -8.37 | -1.03 | 46.5 | 28 | 18 | 422 | 120 | 46.5 | 120 | 119.4  | 3923 | 95.789 | 96.26793 |
| 514.37 | -8.39 | -1.03 | 46.5 | 38 | 22 | 478 | 106 | 46.5 | 106 | 105.47 | 3924 | 95.788 | 96.26682 |
| 514.85 | -8.42 | -1.03 | 46.5 | 38 | 14 | 428 | 104 | 46.5 | 104 | 103.48 | 3926 | 95.787 | 96.26617 |
| 515.03 | -8.45 | -1.03 | 46.5 | 36 | 16 | 422 | 112 | 46.5 | 112 | 111.44 | 3928 | 95.787 | 96.26591 |
| 515.31 | -8.47 | -1.03 | 46.6 | 30 | 16 | 396 | 88  | 46.6 | 88  | 87.562 | 3930 | 95.787 | 96.26584 |
| 515.61 | -8.5  | -1.03 | 46.6 | 44 | 14 | 416 | 110 | 46.6 | 110 | 109.45 | 3932 | 95.787 | 96.26589 |

|        |       |       |      |     |    |     |     |      |     |        |      |        |          |
|--------|-------|-------|------|-----|----|-----|-----|------|-----|--------|------|--------|----------|
| 515.74 | -8.53 | -1.03 | 46.6 | 32  | 14 | 408 | 122 | 46.6 | 122 | 121.39 | 3934 | 95.787 | 96.26583 |
| 516.1  | -8.55 | -1.03 | 46.6 | 38  | 22 | 396 | 120 | 46.6 | 120 | 119.4  | 3936 | 95.787 | 96.26559 |
| 516.21 | -8.58 | -1.03 | 46.6 | 36  | 18 | 374 | 106 | 46.6 | 106 | 105.47 | 3938 | 95.786 | 96.26505 |
| 516.42 | -8.61 | -1.03 | 46.7 | 42  | 22 | 394 | 118 | 46.7 | 118 | 117.41 | 3940 | 95.785 | 96.26412 |
| 516.71 | -8.64 | -1.03 | 46.7 | 44  | 22 | 376 | 108 | 46.7 | 108 | 107.46 | 3942 | 95.784 | 96.26271 |
| 516.84 | -8.67 | -1.03 | 46.7 | 38  | 18 | 430 | 108 | 46.7 | 108 | 107.46 | 3944 | 95.782 | 96.26093 |
| 517.17 | -8.69 | -1.03 | 46.7 | 34  | 24 | 388 | 114 | 46.7 | 114 | 113.43 | 3946 | 95.78  | 96.25901 |
| 517.33 | -8.72 | -1.03 | 46.7 | 40  | 24 | 382 | 108 | 46.7 | 108 | 107.46 | 3948 | 95.778 | 96.25734 |
| 517.5  | -8.75 | -1.03 | 46.8 | 38  | 34 | 356 | 114 | 46.8 | 114 | 113.43 | 3950 | 95.777 | 96.25626 |
| 517.92 | -8.78 | -1.03 | 46.8 | 46  | 24 | 364 | 128 | 46.8 | 128 | 127.36 | 3951 | 95.777 | 96.256   |
| 518.12 | -8.81 | -1.03 | 46.8 | 48  | 28 | 372 | 110 | 46.8 | 110 | 109.45 | 3953 | 95.778 | 96.2565  |
| 518.43 | -8.84 | -1.03 | 46.8 | 40  | 22 | 368 | 112 | 46.8 | 112 | 111.44 | 3955 | 95.779 | 96.25745 |
| 518.69 | -8.86 | -1.03 | 46.8 | 42  | 26 | 376 | 104 | 46.8 | 104 | 103.48 | 3957 | 95.779 | 96.25836 |
| 518.84 | -8.89 | -1.03 | 46.9 | 54  | 30 | 358 | 122 | 46.9 | 122 | 121.39 | 3959 | 95.78  | 96.25874 |
| 519.19 | -8.92 | -1.03 | 46.9 | 34  | 28 | 366 | 112 | 46.9 | 112 | 111.44 | 3961 | 95.779 | 96.2582  |
| 519.29 | -8.94 | -1.03 | 46.9 | 42  | 30 | 348 | 128 | 46.9 | 128 | 127.36 | 3963 | 95.778 | 96.25661 |
| 519.54 | -8.97 | -1.03 | 46.9 | 38  | 34 | 426 | 160 | 46.9 | 160 | 159.2  | 3965 | 95.775 | 96.25406 |
| 519.81 | -9    | -1.03 | 46.9 | 46  | 24 | 382 | 146 | 46.9 | 146 | 145.27 | 3967 | 95.772 | 96.25092 |
| 519.96 | -9.02 | -1.03 | 47   | 38  | 34 | 392 | 142 | 47   | 142 | 141.29 | 3969 | 95.769 | 96.24762 |
| 520.29 | -9.05 | -1.03 | 47   | 44  | 32 | 364 | 132 | 47   | 132 | 131.34 | 3971 | 95.766 | 96.24458 |
| 520.45 | -9.07 | -1.03 | 47   | 42  | 38 | 342 | 126 | 47   | 126 | 125.37 | 3973 | 95.763 | 96.24206 |
| 520.66 | -9.1  | -1.03 | 47   | 42  | 26 | 344 | 154 | 47   | 154 | 153.23 | 3975 | 95.761 | 96.24023 |
| 521    | -9.12 | -1.03 | 47   | 40  | 28 | 370 | 136 | 47   | 136 | 135.32 | 3977 | 95.76  | 96.23899 |
| 521.25 | -9.15 | -1.03 | 47.1 | 54  | 24 | 430 | 172 | 47.1 | 172 | 171.14 | 3978 | 95.759 | 96.23811 |
| 521.62 | -9.17 | -1.03 | 47.1 | 50  | 38 | 364 | 142 | 47.1 | 142 | 141.29 | 3980 | 95.759 | 96.2373  |
| 521.8  | -9.2  | -1.03 | 47.1 | 62  | 24 | 374 | 130 | 47.1 | 130 | 129.35 | 3982 | 95.758 | 96.23637 |
| 522.04 | -9.22 | -1.03 | 47.1 | 46  | 38 | 380 | 164 | 47.1 | 164 | 163.18 | 3984 | 95.756 | 96.23504 |
| 522.32 | -9.24 | -1.03 | 47.1 | 50  | 34 | 350 | 162 | 47.1 | 162 | 161.19 | 3986 | 95.755 | 96.23328 |
| 522.44 | -9.26 | -1.03 | 47.2 | 58  | 46 | 340 | 190 | 47.2 | 190 | 189.05 | 3988 | 95.752 | 96.23112 |
| 522.73 | -9.29 | -1.03 | 47.2 | 72  | 24 | 348 | 170 | 47.2 | 170 | 169.15 | 3990 | 95.75  | 96.22873 |
| 522.93 | -9.31 | -1.03 | 47.2 | 66  | 42 | 352 | 168 | 47.2 | 168 | 167.16 | 3992 | 95.748 | 96.22627 |
| 523.12 | -9.34 | -1.03 | 47.2 | 78  | 36 | 344 | 188 | 47.2 | 188 | 187.06 | 3994 | 95.745 | 96.22391 |
| 523.43 | -9.36 | -1.03 | 47.2 | 80  | 32 | 370 | 196 | 47.2 | 196 | 195.02 | 3996 | 95.743 | 96.22166 |
| 523.55 | -9.39 | -1.03 | 47.3 | 108 | 32 | 362 | 222 | 47.3 | 222 | 220.9  | 3998 | 95.741 | 96.21951 |
| 523.81 | -9.42 | -1.03 | 47.3 | 100 | 20 | 388 | 216 | 47.3 | 216 | 214.93 | 4000 | 95.739 | 96.21732 |
| 524.05 | -9.45 | -1.03 | 47.3 | 120 | 32 | 362 | 226 | 47.3 | 226 | 224.88 | 4002 | 0      | 0        |
| 524.33 | -9.48 | -1.03 | 47.3 | 146 | 30 | 346 | 254 | 47.3 | 254 | 252.74 |      |        |          |
| 524.68 | -9.51 | -1.03 | 47.3 | 176 | 24 | 374 | 254 | 47.3 | 254 | 252.74 |      |        |          |
| 524.85 | -9.53 | -1.03 | 47.4 | 172 | 24 | 392 | 274 | 47.4 | 274 | 272.64 |      |        |          |
| 525.12 | -9.57 | -1.03 | 47.4 | 196 | 18 | 394 | 312 | 47.4 | 312 | 310.45 |      |        |          |
| 525.33 | -9.59 | -1.03 | 47.4 | 238 | 20 | 390 | 364 | 47.4 | 364 | 362.19 |      |        |          |
| 525.47 | -9.62 | -1.03 | 47.4 | 260 | 26 | 356 | 370 | 47.4 | 370 | 368.16 |      |        |          |
| 525.76 | -9.65 | -1.03 | 47.4 | 298 | 16 | 372 | 428 | 47.4 | 428 | 425.87 |      |        |          |
| 525.92 | -9.67 | -1.03 | 47.5 | 378 | 22 | 408 | 460 | 47.5 | 460 | 457.71 |      |        |          |
| 526.16 | -9.69 | -1.03 | 47.5 | 456 | 16 | 382 | 494 | 47.5 | 494 | 491.54 |      |        |          |
| 526.38 | -9.72 | -1.03 | 47.5 | 600 | 14 | 370 | 526 | 47.5 | 526 | 523.38 |      |        |          |
| 526.55 | -9.74 | -1.03 | 47.5 | 678 | 18 | 360 | 544 | 47.5 | 544 | 541.29 |      |        |          |

|        |       |       |      |      |    |     |     |      |     |        |
|--------|-------|-------|------|------|----|-----|-----|------|-----|--------|
| 526.84 | -9.76 | -1.03 | 47.5 | 828  | 26 | 342 | 644 | 47.5 | 644 | 640.8  |
| 527.01 | -9.78 | -1.03 | 47.6 | 1006 | 8  | 360 | 606 | 47.6 | 606 | 602.99 |
| 527.32 | -9.8  | -1.03 | 47.6 | 1214 | 16 | 400 | 664 | 47.6 | 664 | 660.7  |
| 527.64 | -9.82 | -1.03 | 47.6 | 1426 | 20 | 356 | 610 | 47.6 | 610 | 606.97 |
| 527.81 | -9.84 | -1.03 | 47.6 | 1626 | 18 | 404 | 586 | 47.6 | 586 | 583.08 |
| 528.14 | -9.86 | -1.03 | 47.6 | 1678 | 10 | 350 | 614 | 47.6 | 614 | 610.95 |
| 528.29 | -9.88 | -1.03 | 47.7 | 1740 | 20 | 378 | 618 | 47.7 | 618 | 614.93 |
| 528.51 | -9.89 | -1.03 | 47.7 | 1834 | 20 | 348 | 516 | 47.7 | 516 | 513.43 |
| 528.75 | -9.91 | -1.03 | 47.7 | 1664 | 16 | 386 | 516 | 47.7 | 516 | 513.43 |
| 528.89 | -9.93 | -1.03 | 47.7 | 1616 | 16 | 370 | 490 | 47.7 | 490 | 487.56 |
| 529.21 | -9.95 | -1.03 | 47.7 | 1476 | 12 | 362 | 488 | 47.7 | 488 | 485.57 |
| 529.38 | -9.97 | -1.03 | 47.8 | 1422 | 14 | 374 | 426 | 47.8 | 426 | 423.88 |
| 529.56 | -9.99 | -1.03 | 47.8 | 1252 | 14 | 410 | 394 | 47.8 | 394 | 392.04 |
| 529.88 | -10   | -1.03 | 47.8 | 1176 | 14 | 388 | 358 | 47.8 | 358 | 356.22 |
| 529.99 | -10   | -1.03 | 47.8 | 984  | 20 | 374 | 354 | 47.8 | 354 | 352.24 |
| 530.37 | -10.1 | -1.03 | 47.8 | 830  | 14 | 372 | 308 | 47.8 | 308 | 306.47 |
| 530.66 | -10.1 | -1.03 | 47.9 | 668  | 20 | 400 | 296 | 47.9 | 296 | 294.53 |
| 530.83 | -10.1 | -1.03 | 47.9 | 568  | 14 | 382 | 296 | 47.9 | 296 | 294.53 |
| 531.21 | -10.1 | -1.03 | 47.9 | 474  | 16 | 406 | 234 | 47.9 | 234 | 232.84 |
| 531.35 | -10.2 | -1.03 | 47.9 | 372  | 22 | 360 | 212 | 47.9 | 212 | 210.95 |
| 531.62 | -10.2 | -1.03 | 47.9 | 300  | 14 | 380 | 228 | 47.9 | 228 | 226.87 |
| 531.83 | -10.2 | -1.03 | 48   | 272  | 14 | 384 | 202 | 48   | 202 | 201    |
| 531.97 | -10.3 | -1.03 | 48   | 206  | 14 | 386 | 202 | 48   | 202 | 201    |
| 532.35 | -10.3 | -1.03 | 48   | 190  | 14 | 358 | 186 | 48   | 186 | 185.07 |
| 532.49 | -10.3 | -1.03 | 48   | 164  | 14 | 376 | 198 | 48   | 198 | 197.01 |
| 532.72 | -10.4 | -1.03 | 48   | 154  | 22 | 378 | 188 | 48   | 188 | 187.06 |
| 533.01 | -10.4 | -1.03 | 48.1 | 128  | 20 | 360 | 150 | 48.1 | 150 | 149.25 |
| 533.11 | -10.4 | -1.03 | 48.1 | 118  | 12 | 386 | 152 | 48.1 | 152 | 151.24 |
| 533.54 | -10.5 | -1.03 | 48.1 | 114  | 10 | 374 | 186 | 48.1 | 186 | 185.07 |
| 533.78 | -10.5 | -1.03 | 48.1 | 96   | 12 | 380 | 134 | 48.1 | 134 | 133.33 |
| 534.02 | -10.5 | -1.03 | 48.1 | 82   | 16 | 376 | 142 | 48.1 | 142 | 141.29 |
| 534.37 | -10.6 | -1.03 | 48.2 | 82   | 10 | 398 | 148 | 48.2 | 148 | 147.26 |
| 534.52 | -10.6 | -1.03 | 48.2 | 88   | 12 | 360 | 146 | 48.2 | 146 | 145.27 |
| 534.83 | -10.6 | -1.03 | 48.2 | 68   | 12 | 386 | 110 | 48.2 | 110 | 109.45 |
| 535.01 | -10.7 | -1.03 | 48.2 | 78   | 8  | 366 | 164 | 48.2 | 164 | 163.18 |
| 535.18 | -10.7 | -1.03 | 48.2 | 64   | 14 | 440 | 132 | 48.2 | 132 | 131.34 |
| 535.52 | -10.7 | -1.03 | 48.3 | 64   | 18 | 372 | 144 | 48.3 | 144 | 143.28 |
| 535.66 | -10.7 | -1.03 | 48.3 | 54   | 18 | 434 | 118 | 48.3 | 118 | 117.41 |
| 535.95 | -10.8 | -1.03 | 48.3 | 72   | 8  | 394 | 124 | 48.3 | 124 | 123.38 |
| 536.18 | -10.8 | -1.03 | 48.3 | 54   | 6  | 442 | 122 | 48.3 | 122 | 121.39 |
| 536.32 | -10.8 | -1.03 | 48.3 | 62   | 18 | 408 | 100 | 48.3 | 100 | 99.502 |
| 536.7  | -10.9 | -1.03 | 48.4 | 58   | 16 | 404 | 118 | 48.4 | 118 | 117.41 |
| 536.95 | -10.9 | -1.03 | 48.4 | 60   | 14 | 442 | 130 | 48.4 | 130 | 129.35 |
| 537.24 | -10.9 | -1.03 | 48.4 | 46   | 22 | 414 | 122 | 48.4 | 122 | 121.39 |
| 537.55 | -10.9 | -1.03 | 48.4 | 44   | 18 | 448 | 126 | 48.4 | 126 | 125.37 |
| 537.71 | -11   | -1.03 | 48.4 | 48   | 18 | 428 | 140 | 48.4 | 140 | 139.3  |
| 538.06 | -11   | -1.03 | 48.5 | 48   | 14 | 464 | 106 | 48.5 | 106 | 105.47 |

|        |       |       |      |    |    |      |     |      |     |        |
|--------|-------|-------|------|----|----|------|-----|------|-----|--------|
| 538.21 | -11   | -1.03 | 48.5 | 58 | 16 | 492  | 138 | 48.5 | 138 | 137.31 |
| 538.4  | -11.1 | -1.03 | 48.5 | 44 | 22 | 478  | 124 | 48.5 | 124 | 123.38 |
| 538.74 | -11.1 | -1.03 | 48.5 | 66 | 22 | 542  | 124 | 48.5 | 124 | 123.38 |
| 538.86 | -11.1 | -1.03 | 48.5 | 40 | 18 | 524  | 118 | 48.5 | 118 | 117.41 |
| 539.2  | -11.1 | -1.03 | 48.6 | 32 | 24 | 558  | 164 | 48.6 | 164 | 163.18 |
| 539.38 | -11.2 | -1.03 | 48.6 | 42 | 22 | 576  | 138 | 48.6 | 138 | 137.31 |
| 539.57 | -11.2 | -1.03 | 48.6 | 38 | 14 | 650  | 150 | 48.6 | 150 | 149.25 |
| 539.88 | -11.2 | -1.03 | 48.6 | 34 | 22 | 648  | 146 | 48.6 | 146 | 145.27 |
| 540.14 | -11.3 | -1.03 | 48.6 | 34 | 18 | 740  | 160 | 48.6 | 160 | 159.2  |
| 540.51 | -11.3 | -1.03 | 48.7 | 40 | 16 | 740  | 172 | 48.7 | 172 | 171.14 |
| 540.74 | -11.3 | -1.03 | 48.7 | 30 | 20 | 926  | 158 | 48.7 | 158 | 157.21 |
| 540.98 | -11.4 | -1.03 | 48.7 | 40 | 12 | 988  | 188 | 48.7 | 188 | 187.06 |
| 541.29 | -11.4 | -1.03 | 48.7 | 36 | 16 | 1044 | 188 | 48.7 | 188 | 187.06 |
| 541.44 | -11.4 | -1.03 | 48.7 | 30 | 24 | 1156 | 188 | 48.7 | 188 | 187.06 |
| 541.71 | -11.4 | -1.03 | 48.8 | 36 | 20 | 1248 | 230 | 48.8 | 230 | 228.86 |
| 541.92 | -11.5 | -1.03 | 48.8 | 26 | 32 | 1426 | 208 | 48.8 | 208 | 206.97 |
| 542.14 | -11.5 | -1.03 | 48.8 | 40 | 28 | 1498 | 182 | 48.8 | 182 | 181.09 |
| 542.46 | -11.5 | -1.03 | 48.8 | 28 | 22 | 1576 | 210 | 48.8 | 210 | 208.96 |
| 542.62 | -11.6 | -1.03 | 48.8 | 30 | 32 | 1502 | 202 | 48.8 | 202 | 201    |
| 542.88 | -11.6 | -1.03 | 48.9 | 36 | 28 | 1602 | 192 | 48.9 | 192 | 191.04 |
| 543.12 | -11.6 | -1.03 | 48.9 | 28 | 24 | 1552 | 208 | 48.9 | 208 | 206.97 |
| 543.4  | -11.7 | -1.03 | 48.9 | 28 | 42 | 1540 | 174 | 48.9 | 174 | 173.13 |
| 543.81 | -11.7 | -1.03 | 48.9 | 20 | 22 | 1372 | 192 | 48.9 | 192 | 191.04 |
| 544    | -11.7 | -1.03 | 48.9 | 22 | 34 | 1440 | 168 | 48.9 | 168 | 167.16 |
| 544.29 | -11.7 | -1.03 | 49   | 24 | 18 | 1408 | 164 | 49   | 164 | 163.18 |
| 544.56 | -11.8 | -1.03 | 49   | 30 | 16 | 1306 | 148 | 49   | 148 | 147.26 |
| 544.72 | -11.8 | -1.03 | 49   | 14 | 22 | 1200 | 136 | 49   | 136 | 135.32 |
| 545.03 | -11.8 | -1.03 | 49   | 24 | 28 | 1130 | 162 | 49   | 162 | 161.19 |
| 545.21 | -11.9 | -1.03 | 49   | 32 | 20 | 1052 | 170 | 49   | 170 | 169.15 |
| 545.45 | -11.9 | -1.03 | 49.1 | 20 | 32 | 932  | 134 | 49.1 | 134 | 133.33 |
| 545.74 | -11.9 | -1.03 | 49.1 | 28 | 24 | 836  | 138 | 49.1 | 138 | 137.31 |
| 545.89 | -11.9 | -1.03 | 49.1 | 24 | 40 | 816  | 120 | 49.1 | 120 | 119.4  |
| 546.22 | -12   | -1.03 | 49.1 | 24 | 30 | 692  | 118 | 49.1 | 118 | 117.41 |
| 546.41 | -12   | -1.03 | 49.1 | 32 | 32 | 624  | 120 | 49.1 | 120 | 119.4  |
| 546.7  | -12   | -1.03 | 49.2 | 22 | 38 | 596  | 122 | 49.2 | 122 | 121.39 |
| 547.09 | -12   | -1.03 | 49.2 | 32 | 38 | 600  | 132 | 49.2 | 132 | 131.34 |
| 547.29 | -12   | -1.03 | 49.2 | 26 | 44 | 582  | 114 | 49.2 | 114 | 113.43 |
| 547.63 | -12.1 | -1.03 | 49.2 | 34 | 34 | 552  | 114 | 49.2 | 114 | 113.43 |
| 547.84 | -12.1 | -1.03 | 49.2 | 36 | 36 | 532  | 124 | 49.2 | 124 | 123.38 |
| 548.04 | -12.1 | -1.03 | 49.3 | 22 | 46 | 490  | 116 | 49.3 | 116 | 115.42 |
| 548.35 | -12.1 | -1.03 | 49.3 | 26 | 50 | 440  | 108 | 49.3 | 108 | 107.46 |
| 548.47 | -12.2 | -1.03 | 49.3 | 28 | 36 | 452  | 126 | 49.3 | 126 | 125.37 |
| 548.78 | -12.2 | -1.03 | 49.3 | 16 | 54 | 428  | 112 | 49.3 | 112 | 111.44 |
| 549.02 | -12.2 | -1.03 | 49.3 | 24 | 66 | 462  | 118 | 49.3 | 118 | 117.41 |
| 549.19 | -12.2 | -1.03 | 49.4 | 26 | 70 | 470  | 126 | 49.4 | 126 | 125.37 |
| 549.57 | -12.3 | -1.03 | 49.4 | 24 | 58 | 400  | 116 | 49.4 | 116 | 115.42 |
| 549.69 | -12.3 | -1.03 | 49.4 | 26 | 62 | 396  | 104 | 49.4 | 104 | 103.48 |

|        |       |       |      |    |     |     |     |      |     |        |
|--------|-------|-------|------|----|-----|-----|-----|------|-----|--------|
| 550.01 | -12.3 | -1.03 | 49.4 | 32 | 64  | 434 | 130 | 49.4 | 130 | 129.35 |
| 550.39 | -12.3 | -1.03 | 49.4 | 24 | 76  | 418 | 106 | 49.4 | 106 | 105.47 |
| 550.57 | -12.3 | -1.03 | 49.5 | 20 | 82  | 392 | 120 | 49.5 | 120 | 119.4  |
| 550.97 | -12.4 | -1.03 | 49.5 | 28 | 94  | 394 | 118 | 49.5 | 118 | 117.41 |
| 551.15 | -12.4 | -1.03 | 49.5 | 30 | 96  | 402 | 124 | 49.5 | 124 | 123.38 |
| 551.39 | -12.4 | -1.03 | 49.5 | 18 | 94  | 392 | 146 | 49.5 | 146 | 145.27 |
| 551.68 | -12.4 | -1.03 | 49.5 | 30 | 110 | 394 | 132 | 49.5 | 132 | 131.34 |
| 551.79 | -12.4 | -1.03 | 49.6 | 22 | 100 | 372 | 162 | 49.6 | 162 | 161.19 |
| 552.16 | -12.4 | -1.03 | 49.6 | 20 | 140 | 406 | 158 | 49.6 | 158 | 157.21 |
| 552.34 | -12.4 | -1.03 | 49.6 | 22 | 148 | 378 | 146 | 49.6 | 146 | 145.27 |
| 552.56 | -12.4 | -1.03 | 49.6 | 20 | 166 | 364 | 160 | 49.6 | 160 | 159.2  |
| 552.89 | -12.5 | -1.03 | 49.6 | 24 | 170 | 370 | 140 | 49.6 | 140 | 139.3  |
| 553.02 | -12.5 | -1.03 | 49.7 | 26 | 152 | 386 | 150 | 49.7 | 150 | 149.25 |
| 553.34 | -12.5 | -1.03 | 49.7 | 28 | 186 | 404 | 152 | 49.7 | 152 | 151.24 |
| 553.68 | -12.5 | -1.03 | 49.7 | 24 | 162 | 370 | 148 | 49.7 | 148 | 147.26 |
| 553.9  | -12.5 | -1.03 | 49.7 | 22 | 144 | 348 | 126 | 49.7 | 126 | 125.37 |
| 554.27 | -12.5 | -1.03 | 49.7 | 24 | 176 | 402 | 136 | 49.7 | 136 | 135.32 |
| 554.44 | -12.6 | -1.03 | 49.8 | 14 | 162 | 364 | 132 | 49.8 | 132 | 131.34 |
| 554.72 | -12.6 | -1.03 | 49.8 | 22 | 148 | 386 | 158 | 49.8 | 158 | 157.21 |
| 554.97 | -12.6 | -1.03 | 49.8 | 24 | 166 | 406 | 122 | 49.8 | 122 | 121.39 |
| 555.11 | -12.6 | -1.03 | 49.8 | 26 | 170 | 388 | 138 | 49.8 | 138 | 137.31 |
| 555.45 | -12.6 | -1.03 | 49.8 | 12 | 154 | 350 | 144 | 49.8 | 144 | 143.28 |
| 555.63 | -12.7 | -1.03 | 49.9 | 28 | 134 | 386 | 124 | 49.9 | 124 | 123.38 |
| 555.9  | -12.7 | -1.03 | 49.9 | 20 | 140 | 366 | 122 | 49.9 | 122 | 121.39 |
| 556.16 | -12.7 | -1.03 | 49.9 | 28 | 126 | 384 | 128 | 49.9 | 128 | 127.36 |
| 556.3  | -12.8 | -1.03 | 49.9 | 18 | 122 | 360 | 124 | 49.9 | 124 | 123.38 |
| 556.64 | -12.8 | -1.03 | 49.9 | 22 | 90  | 330 | 146 | 49.9 | 146 | 145.27 |
| 556.89 | -12.8 | -1.03 | 50   | 24 | 108 | 394 | 132 | 50   | 132 | 131.34 |
| 557.19 | -12.8 | -1.03 | 50   | 20 | 90  | 382 | 126 | 50   | 126 | 125.37 |
| 557.52 | -12.9 | -1.03 | 50   | 24 | 68  | 410 | 142 | 50   | 142 | 141.29 |
| 557.7  | -12.9 | -1.03 | 50   | 20 | 74  | 352 | 140 | 50   | 140 | 139.3  |
| 558.03 | -12.9 | -1.03 | 50   | 22 | 66  | 400 | 134 | 50   | 134 | 133.33 |
| 558.24 | -13   | -1.03 | 50.1 | 24 | 62  | 378 | 120 | 50.1 | 120 | 119.4  |
| 558.4  | -13   | -1.03 | 50.1 | 20 | 62  | 378 | 138 | 50.1 | 138 | 137.31 |
| 558.71 | -13   | -1.03 | 50.1 | 24 | 56  | 376 | 148 | 50.1 | 148 | 147.26 |
| 558.89 | -13   | -1.03 | 50.1 | 28 | 64  | 362 | 138 | 50.1 | 138 | 137.31 |
| 559.2  | -13.1 | -1.03 | 50.1 | 26 | 60  | 372 | 142 | 50.1 | 142 | 141.29 |
| 559.4  | -13.1 | -1.03 | 50.2 | 18 | 52  | 424 | 132 | 50.2 | 132 | 131.34 |
| 559.6  | -13.1 | -1.03 | 50.2 | 22 | 58  | 364 | 146 | 50.2 | 146 | 145.27 |
| 559.88 | -13.2 | -1.03 | 50.2 | 20 | 50  | 374 | 154 | 50.2 | 154 | 153.23 |
| 560.12 | -13.2 | -1.03 | 50.2 | 24 | 46  | 342 | 138 | 50.2 | 138 | 137.31 |
| 560.5  | -13.2 | -1.03 | 50.2 | 18 | 46  | 338 | 128 | 50.2 | 128 | 127.36 |
| 560.74 | -13.2 | -1.03 | 50.3 | 8  | 42  | 422 | 128 | 50.3 | 128 | 127.36 |
| 560.95 | -13.3 | -1.03 | 50.3 | 20 | 40  | 360 | 108 | 50.3 | 108 | 107.46 |
| 561.3  | -13.3 | -1.03 | 50.3 | 26 | 46  | 384 | 130 | 50.3 | 130 | 129.35 |
| 561.46 | -13.3 | -1.03 | 50.3 | 18 | 48  | 404 | 150 | 50.3 | 150 | 149.25 |
| 561.72 | -13.3 | -1.03 | 50.3 | 20 | 30  | 380 | 164 | 50.3 | 164 | 163.18 |

|        |       |       |      |    |    |     |     |      |     |        |
|--------|-------|-------|------|----|----|-----|-----|------|-----|--------|
| 561.95 | -13.4 | -1.03 | 50.4 | 18 | 42 | 384 | 116 | 50.4 | 116 | 115.42 |
| 562.13 | -13.4 | -1.03 | 50.4 | 24 | 28 | 396 | 122 | 50.4 | 122 | 121.39 |
| 562.46 | -13.4 | -1.03 | 50.4 | 28 | 30 | 370 | 130 | 50.4 | 130 | 129.35 |
| 562.61 | -13.4 | -1.03 | 50.4 | 16 | 24 | 346 | 146 | 50.4 | 146 | 145.27 |
| 562.87 | -13.5 | -1.03 | 50.4 | 20 | 34 | 388 | 126 | 50.4 | 126 | 125.37 |
| 563.11 | -13.5 | -1.03 | 50.5 | 28 | 26 | 344 | 136 | 50.5 | 136 | 135.32 |
| 563.29 | -13.5 | -1.03 | 50.5 | 26 | 30 | 360 | 124 | 50.5 | 124 | 123.38 |
| 563.74 | -13.5 | -1.03 | 50.5 | 20 | 34 | 330 | 132 | 50.5 | 132 | 131.34 |
| 563.92 | -13.6 | -1.03 | 50.5 | 26 | 20 | 330 | 138 | 50.5 | 138 | 137.31 |
| 564.2  | -13.6 | -1.03 | 50.5 | 14 | 22 | 386 | 108 | 50.5 | 108 | 107.46 |
| 564.51 | -13.6 | -1.03 | 50.6 | 22 | 28 | 372 | 114 | 50.6 | 114 | 113.43 |
| 564.65 | -13.6 | -1.03 | 50.6 | 16 | 24 | 372 | 126 | 50.6 | 126 | 125.37 |
| 564.98 | -13.7 | -1.03 | 50.6 | 12 | 26 | 314 | 104 | 50.6 | 104 | 103.48 |
| 565.12 | -13.7 | -1.03 | 50.6 | 24 | 24 | 362 | 102 | 50.6 | 102 | 101.49 |
| 565.33 | -13.7 | -1.03 | 50.6 | 22 | 24 | 394 | 102 | 50.6 | 102 | 101.49 |
| 565.65 | -13.7 | -1.03 | 50.7 | 18 | 20 | 378 | 110 | 50.7 | 110 | 109.45 |
| 565.79 | -13.8 | -1.03 | 50.7 | 24 | 26 | 372 | 104 | 50.7 | 104 | 103.48 |
| 566.1  | -13.8 | -1.03 | 50.7 | 22 | 18 | 348 | 120 | 50.7 | 120 | 119.4  |
| 566.29 | -13.8 | -1.03 | 50.7 | 28 | 16 | 378 | 110 | 50.7 | 110 | 109.45 |
| 566.48 | -13.9 | -1.03 | 50.7 | 32 | 22 | 336 | 100 | 50.7 | 100 | 99.502 |
| 566.93 | -13.9 | -1.03 | 50.8 | 14 | 20 | 398 | 96  | 50.8 | 96  | 95.522 |
| 567.13 | -13.9 | -1.03 | 50.8 | 18 | 20 | 362 | 98  | 50.8 | 98  | 97.512 |
| 567.46 | -13.9 | -1.03 | 50.8 | 24 | 22 | 382 | 100 | 50.8 | 100 | 99.502 |
| 567.72 | -14   | -1.03 | 50.8 | 26 | 18 | 348 | 108 | 50.8 | 108 | 107.46 |
| 567.89 | -14   | -1.03 | 50.8 | 24 | 18 | 366 | 108 | 50.8 | 108 | 107.46 |
| 568.25 | -14   | -1.03 | 50.9 | 20 | 22 | 380 | 96  | 50.9 | 96  | 95.522 |
| 568.34 | -14   | -1.03 | 50.9 | 18 | 18 | 362 | 104 | 50.9 | 104 | 103.48 |
| 568.62 | -14.1 | -1.03 | 50.9 | 20 | 18 | 368 | 98  | 50.9 | 98  | 97.512 |
| 568.91 | -14.1 | -1.03 | 50.9 | 26 | 18 | 360 | 96  | 50.9 | 96  | 95.522 |
| 569.06 | -14.1 | -1.03 | 50.9 | 20 | 12 | 376 | 108 | 50.9 | 108 | 107.46 |
| 569.42 | -14.1 | -1.03 | 51   | 34 | 20 | 378 | 108 | 51   | 108 | 107.46 |
| 569.56 | -14.2 | -1.03 | 51   | 24 | 24 | 336 | 98  | 51   | 98  | 97.512 |
| 569.78 | -14.2 | -1.03 | 51   | 32 | 20 | 406 | 112 | 51   | 112 | 111.44 |
| 570.19 | -14.2 | -1.03 | 51   | 20 | 14 | 370 | 128 | 51   | 128 | 127.36 |
| 570.44 | -14.2 | -1.03 | 51   | 22 | 20 | 376 | 98  | 51   | 98  | 97.512 |
| 570.8  | -14.3 | -1.03 | 51.1 | 24 | 12 | 394 | 118 | 51.1 | 118 | 117.41 |
| 571.03 | -14.3 | -1.03 | 51.1 | 22 | 26 | 364 | 120 | 51.1 | 120 | 119.4  |
| 571.26 | -14.3 | -1.03 | 51.1 | 26 | 18 | 386 | 104 | 51.1 | 104 | 103.48 |
| 571.56 | -14.3 | -1.03 | 51.1 | 24 | 20 | 368 | 106 | 51.1 | 106 | 105.47 |
| 571.68 | -14.3 | -1.03 | 51.1 | 22 | 20 | 388 | 106 | 51.1 | 106 | 105.47 |
| 572    | -14.4 | -1.03 | 51.2 | 18 | 20 | 368 | 118 | 51.2 | 118 | 117.41 |
| 572.23 | -14.4 | -1.03 | 51.2 | 18 | 14 | 400 | 120 | 51.2 | 120 | 119.4  |
| 572.42 | -14.4 | -1.03 | 51.2 | 14 | 12 | 392 | 128 | 51.2 | 128 | 127.36 |
| 572.76 | -14.4 | -1.03 | 51.2 | 22 | 22 | 412 | 122 | 51.2 | 122 | 121.39 |
| 572.9  | -14.4 | -1.03 | 51.2 | 26 | 14 | 374 | 120 | 51.2 | 120 | 119.4  |
| 573.17 | -14.4 | -1.03 | 51.3 | 16 | 10 | 380 | 136 | 51.3 | 136 | 135.32 |
| 573.5  | -14.5 | -1.03 | 51.3 | 32 | 16 | 430 | 120 | 51.3 | 120 | 119.4  |

|        |       |       |      |    |    |     |     |      |     |        |
|--------|-------|-------|------|----|----|-----|-----|------|-----|--------|
| 573.77 | -14.5 | -1.03 | 51.3 | 20 | 14 | 400 | 120 | 51.3 | 120 | 119.4  |
| 574.15 | -14.5 | -1.03 | 51.3 | 20 | 8  | 398 | 88  | 51.3 | 88  | 87.562 |
| 574.33 | -14.5 | -1.03 | 51.3 | 24 | 22 | 398 | 142 | 51.3 | 142 | 141.29 |
| 574.63 | -14.5 | -1.03 | 51.4 | 18 | 18 | 438 | 130 | 51.4 | 130 | 129.35 |
| 574.89 | -14.6 | -1.03 | 51.4 | 30 | 18 | 418 | 122 | 51.4 | 122 | 121.39 |
| 575.05 | -14.6 | -1.03 | 51.4 | 16 | 14 | 458 | 122 | 51.4 | 122 | 121.39 |
| 575.36 | -14.6 | -1.03 | 51.4 | 16 | 16 | 464 | 134 | 51.4 | 134 | 133.33 |
| 575.54 | -14.6 | -1.03 | 51.4 | 28 | 18 | 412 | 110 | 51.4 | 110 | 109.45 |
| 575.8  | -14.6 | -1.03 | 51.5 | 22 | 16 | 412 | 104 | 51.5 | 104 | 103.48 |
| 576.08 | -14.7 | -1.03 | 51.5 | 28 | 16 | 428 | 110 | 51.5 | 110 | 109.45 |
| 576.24 | -14.7 | -1.03 | 51.5 | 24 | 8  | 426 | 114 | 51.5 | 114 | 113.43 |
| 576.59 | -14.7 | -1.03 | 51.5 | 16 | 14 | 456 | 98  | 51.5 | 98  | 97.512 |
| 576.79 | -14.8 | -1.03 | 51.5 | 24 | 6  | 444 | 198 | 51.5 | 198 | 197.01 |
| 577.13 | -14.8 | -1.03 | 51.6 | 22 | 12 | 448 | 200 | 51.6 | 200 | 199    |
| 577.46 | -14.8 | -1.03 | 51.6 | 8  | 18 | 406 | 202 | 51.6 | 202 | 201    |
| 577.64 | -14.9 | -1.03 | 51.6 | 22 | 10 | 438 | 196 | 51.6 | 196 | 195.02 |
| 577.99 | -14.9 | -1.03 | 51.6 | 24 | 8  | 402 | 216 | 51.6 | 216 | 214.93 |
| 578.17 | -14.9 | -1.03 | 51.6 | 22 | 10 | 394 | 220 | 51.6 | 220 | 218.91 |
| 578.38 | -15   | -1.03 | 51.7 | 22 | 14 | 428 | 248 | 51.7 | 248 | 246.77 |
| 578.64 | -15   | -1.03 | 51.7 | 18 | 12 | 404 | 232 | 51.7 | 232 | 230.85 |
| 578.81 | -15   | -1.03 | 51.7 | 18 | 18 | 384 | 246 | 51.7 | 246 | 244.78 |
| 579.11 | -15.1 | -1.03 | 51.7 | 16 | 18 | 412 | 290 | 51.7 | 290 | 288.56 |
| 579.32 | -15.1 | -1.03 | 51.7 | 26 | 14 | 386 | 282 | 51.7 | 282 | 280.6  |
| 579.53 | -15.1 | -1.03 | 51.8 | 24 | 16 | 398 | 324 | 51.8 | 324 | 322.39 |
| 579.82 | -15.1 | -1.03 | 51.8 | 26 | 14 | 370 | 300 | 51.8 | 300 | 298.51 |
| 579.96 | -15.2 | -1.03 | 51.8 | 22 | 16 | 330 | 350 | 51.8 | 350 | 348.26 |
| 580.33 | -15.2 | -1.03 | 51.8 | 16 | 12 | 366 | 408 | 51.8 | 408 | 405.97 |
| 580.62 | -15.2 | -1.03 | 51.8 | 24 | 14 | 416 | 362 | 51.8 | 362 | 360.2  |
| 580.8  | -15.2 | -1.03 | 51.9 | 14 | 12 | 346 | 382 | 51.9 | 382 | 380.1  |
| 581.17 | -15.3 | -1.03 | 51.9 | 18 | 10 | 378 | 424 | 51.9 | 424 | 421.89 |
| 581.29 | -15.3 | -1.03 | 51.9 | 28 | 14 | 394 | 406 | 51.9 | 406 | 403.98 |
| 581.54 | -15.3 | -1.03 | 51.9 | 16 | 8  | 340 | 368 | 51.9 | 368 | 366.17 |
| 581.75 | -15.3 | -1.03 | 51.9 | 26 | 16 | 382 | 358 | 51.9 | 358 | 356.22 |
| 581.9  | -15.4 | -1.03 | 52   | 22 | 10 | 372 | 312 | 52   | 312 | 310.45 |
| 582.25 | -15.4 | -1.03 | 52   | 30 | 18 | 384 | 294 | 52   | 294 | 292.54 |
| 582.42 | -15.4 | -1.03 | 52   | 30 | 14 | 352 | 294 | 52   | 294 | 292.54 |
| 582.64 | -15.4 | -1.03 | 52   | 20 | 16 | 408 | 270 | 52   | 270 | 268.66 |
| 582.92 | -15.4 | -1.03 | 52   | 16 | 16 | 346 | 298 | 52   | 298 | 296.52 |
| 583.03 | -15.5 | -1.03 | 52.1 | 14 | 8  | 378 | 266 | 52.1 | 266 | 264.68 |
| 583.46 | -15.5 | -1.03 | 52.1 | 28 | 10 | 402 | 280 | 52.1 | 280 | 278.61 |
| 583.71 | -15.5 | -1.03 | 52.1 | 26 | 10 | 346 | 248 | 52.1 | 248 | 246.77 |
| 583.93 | -15.5 | -1.03 | 52.1 | 14 | 16 | 390 | 244 | 52.1 | 244 | 242.79 |
| 584.28 | -15.5 | -1.03 | 52.1 | 24 | 14 | 378 | 228 | 52.1 | 228 | 226.87 |
| 584.43 | -15.6 | -1.03 | 52.2 | 18 | 26 | 360 | 232 | 52.2 | 232 | 230.85 |
| 584.74 | -15.6 | -1.03 | 52.2 | 22 | 14 | 374 | 212 | 52.2 | 212 | 210.95 |
| 584.94 | -15.6 | -1.03 | 52.2 | 26 | 10 | 346 | 186 | 52.2 | 186 | 185.07 |
| 585.11 | -15.6 | -1.03 | 52.2 | 28 | 8  | 372 | 188 | 52.2 | 188 | 187.06 |

|        |       |       |      |    |    |     |     |      |     |        |
|--------|-------|-------|------|----|----|-----|-----|------|-----|--------|
| 585.46 | -15.7 | -1.03 | 52.2 | 20 | 24 | 368 | 192 | 52.2 | 192 | 191.04 |
| 585.61 | -15.7 | -1.03 | 52.3 | 24 | 26 | 394 | 202 | 52.3 | 202 | 201    |
| 585.9  | -15.7 | -1.03 | 52.3 | 34 | 20 | 362 | 186 | 52.3 | 186 | 185.07 |
| 586.14 | -15.7 | -1.03 | 52.3 | 22 | 10 | 362 | 180 | 52.3 | 180 | 179.1  |
| 586.28 | -15.8 | -1.03 | 52.3 | 28 | 18 | 348 | 180 | 52.3 | 180 | 179.1  |
| 586.67 | -15.8 | -1.03 | 52.3 | 20 | 8  | 364 | 198 | 52.3 | 198 | 197.01 |
| 586.92 | -15.8 | -1.03 | 52.4 | 26 | 20 | 352 | 156 | 52.4 | 156 | 155.22 |
| 587.23 | -15.8 | -1.03 | 52.4 | 32 | 16 | 368 | 162 | 52.4 | 162 | 161.19 |
| 587.51 | -15.9 | -1.03 | 52.4 | 22 | 6  | 376 | 196 | 52.4 | 196 | 195.02 |
| 587.69 | -15.9 | -1.03 | 52.4 | 16 | 16 | 368 | 166 | 52.4 | 166 | 165.17 |
| 588.04 | -15.9 | -1.03 | 52.4 | 24 | 18 | 390 | 162 | 52.4 | 162 | 161.19 |
| 588.21 | -15.9 | -1.03 | 52.5 | 20 | 20 | 356 | 148 | 52.5 | 148 | 147.26 |
| 588.42 | -16   | -1.03 | 52.5 | 26 | 20 | 398 | 168 | 52.5 | 168 | 167.16 |
| 588.73 | -16   | -1.03 | 52.5 | 14 | 16 | 370 | 174 | 52.5 | 174 | 173.13 |
| 588.88 | -16   | -1.03 | 52.5 | 22 | 16 | 368 | 158 | 52.5 | 158 | 157.21 |
| 589.22 | -16   | -1.03 | 52.5 | 18 | 20 | 382 | 140 | 52.5 | 140 | 139.3  |
| 589.41 | -16.1 | -1.03 | 52.6 | 28 | 18 | 388 | 162 | 52.6 | 162 | 161.19 |
| 589.6  | -16.1 | -1.03 | 52.6 | 14 | 18 | 400 | 152 | 52.6 | 152 | 151.24 |
| 589.91 | -16.1 | -1.03 | 52.6 | 22 | 14 | 358 | 158 | 52.6 | 158 | 157.21 |
| 590.17 | -16.1 | -1.03 | 52.6 | 22 | 26 | 356 | 148 | 52.6 | 148 | 147.26 |
| 590.54 | -16.1 | -1.03 | 52.6 | 26 | 18 | 404 | 142 | 52.6 | 142 | 141.29 |
| 590.78 | -16.2 | -1.03 | 52.7 | 26 | 14 | 386 | 156 | 52.7 | 156 | 155.22 |
| 591.01 | -16.2 | -1.03 | 52.7 | 18 | 16 | 394 | 152 | 52.7 | 152 | 151.24 |
| 591.33 | -16.2 | -1.03 | 52.7 | 22 | 16 | 382 | 152 | 52.7 | 152 | 151.24 |
| 591.49 | -16.2 | -1.03 | 52.7 | 26 | 26 | 338 | 142 | 52.7 | 142 | 141.29 |
| 591.74 | -16.3 | -1.03 | 52.7 | 26 | 18 | 404 | 160 | 52.7 | 160 | 159.2  |
| 591.95 | -16.3 | -1.03 | 52.8 | 22 | 16 | 356 | 164 | 52.8 | 164 | 163.18 |
| 592.16 | -16.3 | -1.03 | 52.8 | 26 | 16 | 392 | 100 | 52.8 | 100 | 99.502 |
| 592.48 | -16.3 | -1.03 | 52.8 | 30 | 18 | 390 | 106 | 52.8 | 106 | 105.47 |
| 592.63 | -16.3 | -1.03 | 52.8 | 34 | 10 | 374 | 92  | 52.8 | 92  | 91.542 |
| 592.88 | -16.4 | -1.03 | 52.8 | 32 | 16 | 350 | 114 | 52.8 | 114 | 113.43 |
| 593.11 | -16.4 | -1.03 | 52.9 | 20 | 20 | 390 | 106 | 52.9 | 106 | 105.47 |
| 593.36 | -16.4 | -1.03 | 52.9 | 20 | 12 | 356 | 108 | 52.9 | 108 | 107.46 |
| 593.77 | -16.4 | -1.03 | 52.9 | 32 | 16 | 388 | 116 | 52.9 | 116 | 115.42 |
| 593.96 | -16.5 | -1.03 | 52.9 | 18 | 20 | 404 | 100 | 52.9 | 100 | 99.502 |
| 594.26 | -16.5 | -1.03 | 52.9 | 24 | 8  | 398 | 124 | 52.9 | 124 | 123.38 |
| 594.51 | -16.5 | -1.03 | 53   | 36 | 12 | 408 | 104 | 53   | 104 | 103.48 |
| 594.66 | -16.5 | -1.03 | 53   | 26 | 18 | 394 | 112 | 53   | 112 | 111.44 |
| 594.97 | -16.6 | -1.03 | 53   | 32 | 10 | 412 | 106 | 53   | 106 | 105.47 |
| 595.11 | -16.6 | -1.03 | 53   | 22 | 14 | 364 | 122 | 53   | 122 | 121.39 |
| 595.36 | -16.6 | -1.03 | 53   | 26 | 14 | 398 | 112 | 53   | 112 | 111.44 |
| 595.64 | -16.6 | -1.03 | 53.1 | 14 | 14 | 394 | 116 | 53.1 | 116 | 115.42 |
| 595.77 | -16.7 | -1.03 | 53.1 | 26 | 10 | 388 | 124 | 53.1 | 124 | 123.38 |
| 596.1  | -16.7 | -1.03 | 53.1 | 30 | 6  | 428 | 126 | 53.1 | 126 | 125.37 |
| 596.25 | -16.7 | -1.03 | 53.1 | 24 | 12 | 374 | 124 | 53.1 | 124 | 123.38 |
| 596.5  | -16.7 | -1.03 | 53.1 | 24 | 14 | 466 | 108 | 53.1 | 108 | 107.46 |
| 596.91 | -16.8 | -1.03 | 53.2 | 20 | 12 | 436 | 120 | 53.2 | 120 | 119.4  |

|        |       |       |      |    |    |     |     |      |     |        |
|--------|-------|-------|------|----|----|-----|-----|------|-----|--------|
| 597.08 | -16.8 | -1.03 | 53.2 | 26 | 18 | 388 | 106 | 53.2 | 106 | 105.47 |
| 597.4  | -16.8 | -1.03 | 53.2 | 22 | 16 | 408 | 138 | 53.2 | 138 | 137.31 |
| 597.63 | -16.9 | -1.03 | 53.2 | 20 | 16 | 454 | 126 | 53.2 | 126 | 125.37 |
| 597.8  | -16.9 | -1.03 | 53.2 | 28 | 6  | 464 | 118 | 53.2 | 118 | 117.41 |
| 598.11 | -16.9 | -1.03 | 53.3 | 30 | 8  | 470 | 122 | 53.3 | 122 | 121.39 |
| 598.21 | -16.9 | -1.03 | 53.3 | 24 | 16 | 518 | 110 | 53.3 | 110 | 109.45 |
| 598.51 | -17   | -1.03 | 53.3 | 20 | 18 | 470 | 120 | 53.3 | 120 | 119.4  |
| 598.72 | -17   | -1.03 | 53.3 | 22 | 14 | 486 | 110 | 53.3 | 110 | 109.45 |
| 598.88 | -17   | -1.03 | 53.3 | 22 | 12 | 490 | 110 | 53.3 | 110 | 109.45 |
| 599.22 | -17   | -1.03 | 53.4 | 18 | 14 | 576 | 126 | 53.4 | 126 | 125.37 |
| 599.33 | -17.1 | -1.03 | 53.4 | 22 | 10 | 526 | 140 | 53.4 | 140 | 139.3  |
| 599.61 | -17.1 | -1.03 | 53.4 | 24 | 14 | 566 | 146 | 53.4 | 146 | 145.27 |
| 599.98 | -17.1 | -1.03 | 53.4 | 36 | 14 | 630 | 134 | 53.4 | 134 | 133.33 |
| 600.16 | -17.1 | -1.03 | 53.4 | 14 | 12 | 610 | 148 | 53.4 | 148 | 147.26 |
| 600.54 | -17.2 | -1.03 | 53.5 | 26 | 6  | 640 | 156 | 53.5 | 156 | 155.22 |
| 600.71 | -17.2 | -1.03 | 53.5 | 20 | 14 | 632 | 132 | 53.5 | 132 | 131.34 |
| 600.92 | -17.2 | -1.03 | 53.5 | 18 | 12 | 690 | 136 | 53.5 | 136 | 135.32 |
| 601.22 | -17.3 | -1.03 | 53.5 | 24 | 16 | 704 | 150 | 53.5 | 150 | 149.25 |
| 601.32 | -17.3 | -1.03 | 53.5 | 26 | 12 | 662 | 170 | 53.5 | 170 | 169.15 |
| 601.66 | -17.3 | -1.03 | 53.6 | 36 | 8  | 738 | 144 | 53.6 | 144 | 143.28 |
| 601.84 | -17.3 | -1.03 | 53.6 | 24 | 8  | 700 | 126 | 53.6 | 126 | 125.37 |
| 602.05 | -17.4 | -1.03 | 53.6 | 32 | 16 | 664 | 132 | 53.6 | 132 | 131.34 |
| 602.36 | -17.4 | -1.03 | 53.6 | 34 | 12 | 678 | 138 | 53.6 | 138 | 137.31 |
| 602.5  | -17.4 | -1.03 | 53.6 | 26 | 18 | 656 | 148 | 53.6 | 148 | 147.26 |
| 602.81 | -17.4 | -1.03 | 53.7 | 22 | 8  | 662 | 140 | 53.7 | 140 | 139.3  |
| 603.09 | -17.4 | -1.03 | 53.7 | 26 | 16 | 654 | 146 | 53.7 | 146 | 145.27 |
| 603.36 | -17.5 | -1.03 | 53.7 | 32 | 12 | 590 | 142 | 53.7 | 142 | 141.29 |
| 603.7  | -17.5 | -1.03 | 53.7 | 32 | 14 | 658 | 138 | 53.7 | 138 | 137.31 |
| 603.86 | -17.5 | -1.03 | 53.7 | 28 | 10 | 570 | 150 | 53.7 | 150 | 149.25 |
| 604.17 | -17.5 | -1.03 | 53.8 | 38 | 14 | 560 | 138 | 53.8 | 138 | 137.31 |
| 604.39 | -17.6 | -1.03 | 53.8 | 26 | 14 | 560 | 170 | 53.8 | 170 | 169.15 |
| 604.55 | -17.6 | -1.03 | 53.8 | 24 | 16 | 520 | 152 | 53.8 | 152 | 151.24 |
| 604.86 | -17.6 | -1.03 | 53.8 | 28 | 14 | 462 | 150 | 53.8 | 150 | 149.25 |
| 605.04 | -17.6 | -1.03 | 53.8 | 26 | 14 | 494 | 168 | 53.8 | 168 | 167.16 |
| 605.3  | -17.7 | -1.03 | 53.9 | 34 | 18 | 466 | 162 | 53.9 | 162 | 161.19 |
| 605.56 | -17.7 | -1.03 | 53.9 | 28 | 6  | 490 | 158 | 53.9 | 158 | 157.21 |
| 605.72 | -17.7 | -1.03 | 53.9 | 22 | 14 | 430 | 146 | 53.9 | 146 | 145.27 |
| 606.04 | -17.7 | -1.03 | 53.9 | 22 | 18 | 416 | 160 | 53.9 | 160 | 159.2  |
| 606.24 | -17.8 | -1.03 | 53.9 | 30 | 14 | 410 | 162 | 53.9 | 162 | 161.19 |
| 606.6  | -17.8 | -1.03 | 54   | 34 | 14 | 400 | 148 | 54   | 148 | 147.26 |
| 606.89 | -17.8 | -1.03 | 54   | 28 | 12 | 400 | 140 | 54   | 140 | 139.3  |
| 607.06 | -17.8 | -1.03 | 54   | 20 | 10 | 410 | 164 | 54   | 164 | 163.18 |
| 607.44 | -17.9 | -1.03 | 54   | 28 | 20 | 376 | 146 | 54   | 146 | 145.27 |
| 607.59 | -17.9 | -1.03 | 54   | 34 | 18 | 408 | 140 | 54   | 140 | 139.3  |
| 607.79 | -17.9 | -1.03 | 54.1 | 26 | 14 | 364 | 160 | 54.1 | 160 | 159.2  |
| 608.08 | -17.9 | -1.03 | 54.1 | 18 | 12 | 412 | 176 | 54.1 | 176 | 175.12 |
| 608.22 | -18   | -1.03 | 54.1 | 24 | 10 | 426 | 150 | 54.1 | 150 | 149.25 |

|        |       |       |      |    |    |     |     |      |     |        |
|--------|-------|-------|------|----|----|-----|-----|------|-----|--------|
| 608.56 | -18   | -1.03 | 54.1 | 16 | 16 | 390 | 136 | 54.1 | 136 | 135.32 |
| 608.75 | -18   | -1.03 | 54.1 | 30 | 18 | 380 | 174 | 54.1 | 174 | 173.13 |
| 608.96 | -18   | -1.03 | 54.2 | 28 | 20 | 382 | 176 | 54.2 | 176 | 175.12 |
| 609.24 | -18.1 | -1.03 | 54.2 | 34 | 18 | 384 | 184 | 54.2 | 184 | 183.08 |
| 609.41 | -18.1 | -1.03 | 54.2 | 30 | 18 | 340 | 154 | 54.2 | 154 | 153.23 |
| 609.83 | -18.1 | -1.03 | 54.2 | 26 | 18 | 374 | 148 | 54.2 | 148 | 147.26 |
| 610.06 | -18.1 | -1.03 | 54.2 | 26 | 20 | 376 | 142 | 54.2 | 142 | 141.29 |
| 610.29 | -18.2 | -1.03 | 54.3 | 22 | 18 | 414 | 160 | 54.3 | 160 | 159.2  |
| 610.62 | -18.2 | -1.03 | 54.3 | 22 | 18 | 404 | 162 | 54.3 | 162 | 161.19 |
| 610.78 | -18.2 | -1.03 | 54.3 | 26 | 20 | 356 | 164 | 54.3 | 164 | 163.18 |
| 611.08 | -18.2 | -1.03 | 54.3 | 16 | 12 | 366 | 158 | 54.3 | 158 | 157.21 |
| 611.25 | -18.3 | -1.03 | 54.3 | 28 | 28 | 364 | 142 | 54.3 | 142 | 141.29 |
| 611.44 | -18.3 | -1.03 | 54.4 | 26 | 16 | 354 | 158 | 54.4 | 158 | 157.21 |
| 611.79 | -18.3 | -1.03 | 54.4 | 22 | 18 | 392 | 150 | 54.4 | 150 | 149.25 |
| 611.92 | -18.3 | -1.03 | 54.4 | 26 | 14 | 346 | 144 | 54.4 | 144 | 143.28 |
| 612.2  | -18.3 | -1.03 | 54.4 | 36 | 22 | 358 | 142 | 54.4 | 142 | 141.29 |
| 612.44 | -18.4 | -1.03 | 54.4 | 24 | 18 | 378 | 154 | 54.4 | 154 | 153.23 |
| 612.57 | -18.4 | -1.03 | 54.5 | 32 | 14 | 390 | 138 | 54.5 | 138 | 137.31 |
| 613.01 | -18.4 | -1.03 | 54.5 | 28 | 14 | 382 | 116 | 54.5 | 116 | 115.42 |
| 613.24 | -18.4 | -1.03 | 54.5 | 26 | 24 | 358 | 108 | 54.5 | 108 | 107.46 |
| 613.5  | -18.4 | -1.03 | 54.5 | 36 | 20 | 420 | 136 | 54.5 | 136 | 135.32 |
| 613.82 | -18.4 | -1.03 | 54.5 | 32 | 18 | 392 | 120 | 54.5 | 120 | 119.4  |
| 613.98 | -18.5 | -1.03 | 54.6 | 36 | 20 | 356 | 108 | 54.6 | 108 | 107.46 |
| 614.32 | -18.5 | -1.03 | 54.6 | 34 | 16 | 384 | 104 | 54.6 | 104 | 103.48 |
| 614.44 | -18.5 | -1.03 | 54.6 | 30 | 16 | 438 | 116 | 54.6 | 116 | 115.42 |
| 614.66 | -18.5 | -1.03 | 54.6 | 24 | 22 | 404 | 114 | 54.6 | 114 | 113.43 |
| 614.97 | -18.5 | -1.03 | 54.6 | 36 | 14 | 382 | 120 | 54.6 | 120 | 119.4  |
| 615.11 | -18.6 | -1.03 | 54.7 | 26 | 16 | 394 | 108 | 54.7 | 108 | 107.46 |
| 615.44 | -18.6 | -1.03 | 54.7 | 34 | 24 | 362 | 134 | 54.7 | 134 | 133.33 |
| 615.63 | -18.6 | -1.03 | 54.7 | 34 | 24 | 374 | 138 | 54.7 | 138 | 137.31 |
| 615.79 | -18.6 | -1.03 | 54.7 | 24 | 14 | 370 | 114 | 54.7 | 114 | 113.43 |
| 616.16 | -18.7 | -1.03 | 54.7 | 26 | 24 | 372 | 110 | 54.7 | 110 | 109.45 |
| 616.39 | -18.7 | -1.03 | 54.8 | 34 | 14 | 386 | 146 | 54.8 | 146 | 145.27 |
| 616.72 | -18.7 | -1.03 | 54.8 | 30 | 24 | 360 | 128 | 54.8 | 128 | 127.36 |
| 616.97 | -18.7 | -1.03 | 54.8 | 28 | 16 | 360 | 118 | 54.8 | 118 | 117.41 |
| 617.17 | -18.8 | -1.03 | 54.8 | 28 | 18 | 404 | 128 | 54.8 | 128 | 127.36 |
| 617.49 | -18.8 | -1.03 | 54.8 | 30 | 20 | 350 | 120 | 54.8 | 120 | 119.4  |
| 617.63 | -18.8 | -1.03 | 54.9 | 32 | 12 | 376 | 128 | 54.9 | 128 | 127.36 |
| 617.86 | -18.9 | -1.03 | 54.9 | 30 | 20 | 362 | 150 | 54.9 | 150 | 149.25 |
| 618.11 | -18.9 | -1.03 | 54.9 | 32 | 14 | 368 | 132 | 54.9 | 132 | 131.34 |
| 618.28 | -18.9 | -1.03 | 54.9 | 22 | 20 | 354 | 156 | 54.9 | 156 | 155.22 |
| 618.6  | -19   | -1.03 | 54.9 | 28 | 20 | 412 | 146 | 54.9 | 146 | 145.27 |
| 618.75 | -19   | -1.03 | 55   | 32 | 26 | 356 | 142 | 55   | 142 | 141.29 |
| 618.99 | -19   | -1.03 | 55   | 44 | 18 | 428 | 146 | 55   | 146 | 145.27 |
| 619.26 | -19   | -1.03 | 55   | 26 | 24 | 386 | 182 | 55   | 182 | 181.09 |
| 619.52 | -19.1 | -1.03 | 55   | 32 | 26 | 360 | 138 | 55   | 138 | 137.31 |
| 619.91 | -19.1 | -1.03 | 55   | 32 | 16 | 358 | 162 | 55   | 162 | 161.19 |

|        |       |       |      |    |    |     |     |      |     |        |
|--------|-------|-------|------|----|----|-----|-----|------|-----|--------|
| 620.09 | -19.1 | -1.03 | 55.1 | 24 | 20 | 352 | 150 | 55.1 | 150 | 149.25 |
| 620.35 | -19.2 | -1.03 | 55.1 | 44 | 12 | 340 | 138 | 55.1 | 138 | 137.31 |
| 620.62 | -19.2 | -1.03 | 55.1 | 38 | 14 | 352 | 152 | 55.1 | 152 | 151.24 |
| 620.79 | -19.2 | -1.03 | 55.1 | 34 | 14 | 376 | 162 | 55.1 | 162 | 161.19 |
| 621.06 | -19.2 | -1.03 | 55.1 | 34 | 20 | 360 | 172 | 55.1 | 172 | 171.14 |
| 621.23 | -19.3 | -1.03 | 55.2 | 34 | 20 | 356 | 142 | 55.2 | 142 | 141.29 |
| 621.46 | -19.3 | -1.03 | 55.2 | 42 | 28 | 380 | 134 | 55.2 | 134 | 133.33 |
| 621.74 | -19.3 | -1.03 | 55.2 | 34 | 22 | 390 | 152 | 55.2 | 152 | 151.24 |
| 621.9  | -19.3 | -1.03 | 55.2 | 36 | 24 | 342 | 138 | 55.2 | 138 | 137.31 |
| 622.2  | -19.4 | -1.03 | 55.2 | 38 | 14 | 394 | 140 | 55.2 | 140 | 139.3  |
| 622.37 | -19.4 | -1.03 | 55.3 | 46 | 24 | 412 | 118 | 55.3 | 118 | 117.41 |
| 622.67 | -19.4 | -1.03 | 55.3 | 38 | 20 | 374 | 118 | 55.3 | 118 | 117.41 |
| 623.03 | -19.4 | -1.03 | 55.3 | 36 | 22 | 396 | 114 | 55.3 | 114 | 113.43 |
| 623.21 | -19.5 | -1.03 | 55.3 | 36 | 24 | 376 | 134 | 55.3 | 134 | 133.33 |
| 623.54 | -19.5 | -1.03 | 55.3 | 30 | 32 | 406 | 126 | 55.3 | 126 | 125.37 |
| 623.76 | -19.5 | -1.03 | 55.4 | 42 | 26 | 376 | 126 | 55.4 | 126 | 125.37 |
| 623.94 | -19.5 | -1.03 | 55.4 | 30 | 22 | 368 | 116 | 55.4 | 116 | 115.42 |
| 624.23 | -19.6 | -1.03 | 55.4 | 42 | 36 | 378 | 120 | 55.4 | 120 | 119.4  |
| 624.36 | -19.6 | -1.03 | 55.4 | 42 | 34 | 328 | 118 | 55.4 | 118 | 117.41 |
| 624.64 | -19.6 | -1.03 | 55.4 | 32 | 22 | 404 | 114 | 55.4 | 114 | 113.43 |
| 624.89 | -19.6 | -1.03 | 55.5 | 44 | 32 | 360 | 108 | 55.5 | 108 | 107.46 |
| 625.05 | -19.7 | -1.03 | 55.5 | 30 | 26 | 362 | 120 | 55.5 | 120 | 119.4  |
| 625.38 | -19.7 | -1.03 | 55.5 | 40 | 32 | 370 | 130 | 55.5 | 130 | 129.35 |
| 625.5  | -19.7 | -1.03 | 55.5 | 36 | 26 | 380 | 126 | 55.5 | 126 | 125.37 |
| 625.8  | -19.7 | -1.03 | 55.5 | 38 | 26 | 364 | 114 | 55.5 | 114 | 113.43 |
| 626.18 | -19.8 | -1.03 | 55.6 | 40 | 34 | 358 | 118 | 55.6 | 118 | 117.41 |
| 626.35 | -19.8 | -1.03 | 55.6 | 40 | 30 | 368 | 118 | 55.6 | 118 | 117.41 |
| 626.71 | -19.8 | -1.03 | 55.6 | 48 | 36 | 344 | 114 | 55.6 | 114 | 113.43 |
| 626.87 | -19.9 | -1.03 | 55.6 | 38 | 26 | 364 | 128 | 55.6 | 128 | 127.36 |
| 627.08 | -19.9 | -1.03 | 55.6 | 36 | 32 | 368 | 116 | 55.6 | 116 | 115.42 |
| 627.32 | -19.9 | -1.03 | 55.7 | 48 | 32 | 368 | 110 | 55.7 | 110 | 109.45 |
| 627.43 | -20   | -1.03 | 55.7 | 38 | 38 | 326 | 114 | 55.7 | 114 | 113.43 |
| 627.74 | -20   | -1.03 | 55.7 | 40 | 38 | 386 | 102 | 55.7 | 102 | 101.49 |
| 627.91 | -20   | -1.03 | 55.7 | 38 | 30 | 350 | 120 | 55.7 | 120 | 119.4  |
| 628.1  | -20   | -1.03 | 55.7 | 40 | 34 | 388 | 112 | 55.7 | 112 | 111.44 |
| 628.39 | -20.1 | -1.03 | 55.8 | 44 | 36 | 384 | 124 | 55.8 | 124 | 123.38 |
| 628.49 | -20.1 | -1.03 | 55.8 | 44 | 52 | 376 | 128 | 55.8 | 128 | 127.36 |
| 628.81 | -20.1 | -1.03 | 55.8 | 46 | 44 | 372 | 134 | 55.8 | 134 | 133.33 |
| 629.09 | -20.2 | -1.03 | 55.8 | 50 | 46 | 376 | 138 | 55.8 | 138 | 137.31 |
| 629.3  | -20.2 | -1.03 | 55.8 | 40 | 52 | 380 | 142 | 55.8 | 142 | 141.29 |
| 629.64 | -20.2 | -1.03 | 55.9 | 62 | 58 | 354 | 154 | 55.9 | 154 | 153.23 |
| 629.78 | -20.2 | -1.03 | 55.9 | 42 | 44 | 358 | 124 | 55.9 | 124 | 123.38 |
| 630.05 | -20.3 | -1.03 | 55.9 | 62 | 60 | 354 | 130 | 55.9 | 130 | 129.35 |
| 630.27 | -20.3 | -1.03 | 55.9 | 44 | 56 | 364 | 132 | 55.9 | 132 | 131.34 |
| 630.39 | -20.3 | -1.03 | 55.9 | 44 | 76 | 360 | 146 | 55.9 | 146 | 145.27 |
| 630.72 | -20.4 | -1.03 | 56   | 72 | 60 | 374 | 148 | 56   | 148 | 147.26 |
| 630.86 | -20.4 | -1.03 | 56   | 56 | 76 | 378 | 150 | 56   | 150 | 149.25 |

|        |       |       |      |      |    |     |     |      |     |        |
|--------|-------|-------|------|------|----|-----|-----|------|-----|--------|
| 631.09 | -20.4 | -1.03 | 56   | 58   | 82 | 362 | 146 | 56   | 146 | 145.27 |
| 631.35 | -20.4 | -1.03 | 56   | 58   | 70 | 368 | 140 | 56   | 140 | 139.3  |
| 631.5  | -20.5 | -1.03 | 56   | 74   | 62 | 366 | 146 | 56   | 146 | 145.27 |
| 631.79 | -20.5 | -1.03 | 56.1 | 86   | 84 | 368 | 158 | 56.1 | 158 | 157.21 |
| 632.04 | -20.6 | -1.03 | 56.1 | 62   | 72 | 408 | 168 | 56.1 | 168 | 167.16 |
| 632.35 | -20.6 | -1.03 | 56.1 | 84   | 60 | 362 | 196 | 56.1 | 196 | 195.02 |
| 632.63 | -20.6 | -1.03 | 56.1 | 72   | 70 | 316 | 192 | 56.1 | 192 | 191.04 |
| 632.8  | -20.7 | -1.03 | 56.1 | 86   | 72 | 416 | 180 | 56.1 | 180 | 179.1  |
| 633.14 | -20.7 | -1.03 | 56.2 | 72   | 66 | 396 | 212 | 56.2 | 212 | 210.95 |
| 633.31 | -20.7 | -1.03 | 56.2 | 96   | 80 | 366 | 204 | 56.2 | 204 | 202.99 |
| 633.5  | -20.8 | -1.03 | 56.2 | 100  | 54 | 378 | 220 | 56.2 | 220 | 218.91 |
| 633.78 | -20.8 | -1.03 | 56.2 | 98   | 70 | 404 | 216 | 56.2 | 216 | 214.93 |
| 633.93 | -20.8 | -1.03 | 56.2 | 122  | 62 | 370 | 242 | 56.2 | 242 | 240.8  |
| 634.26 | -20.9 | -1.03 | 56.3 | 114  | 66 | 344 | 266 | 56.3 | 266 | 264.68 |
| 634.44 | -20.9 | -1.03 | 56.3 | 142  | 60 | 384 | 288 | 56.3 | 288 | 286.57 |
| 634.64 | -20.9 | -1.03 | 56.3 | 130  | 42 | 392 | 294 | 56.3 | 294 | 292.54 |
| 634.92 | -21   | -1.03 | 56.3 | 194  | 58 | 392 | 316 | 56.3 | 316 | 314.43 |
| 635.11 | -21   | -1.03 | 56.3 | 192  | 56 | 412 | 298 | 56.3 | 298 | 296.52 |
| 635.51 | -21   | -1.03 | 56.4 | 220  | 46 | 406 | 354 | 56.4 | 354 | 352.24 |
| 635.75 | -21.1 | -1.03 | 56.4 | 232  | 52 | 394 | 378 | 56.4 | 378 | 376.12 |
| 635.98 | -21.1 | -1.03 | 56.4 | 246  | 46 | 376 | 406 | 56.4 | 406 | 403.98 |
| 636.31 | -21.1 | -1.03 | 56.4 | 278  | 52 | 364 | 412 | 56.4 | 412 | 409.95 |
| 636.45 | -21.2 | -1.03 | 56.4 | 370  | 54 | 386 | 460 | 56.4 | 460 | 457.71 |
| 636.71 | -21.2 | -1.03 | 56.5 | 350  | 56 | 354 | 506 | 56.5 | 506 | 503.48 |
| 636.9  | -21.2 | -1.03 | 56.5 | 460  | 50 | 404 | 538 | 56.5 | 538 | 535.32 |
| 637.11 | -21.2 | -1.03 | 56.5 | 562  | 62 | 396 | 564 | 56.5 | 564 | 561.19 |
| 637.44 | -21.2 | -1.03 | 56.5 | 642  | 54 | 390 | 614 | 56.5 | 614 | 610.95 |
| 637.58 | -21.3 | -1.03 | 56.5 | 754  | 40 | 364 | 732 | 56.5 | 732 | 728.36 |
| 637.86 | -21.3 | -1.03 | 56.6 | 912  | 46 | 378 | 798 | 56.6 | 798 | 794.03 |
| 638.09 | -21.3 | -1.03 | 56.6 | 1072 | 42 | 404 | 830 | 56.6 | 830 | 825.87 |
| 638.25 | -21.3 | -1.03 | 56.6 | 1282 | 46 | 372 | 910 | 56.6 | 910 | 905.47 |
| 638.7  | -21.4 | -1.03 | 56.6 | 1520 | 44 | 410 | 922 | 56.6 | 922 | 917.41 |
| 638.9  | -21.4 | -1.03 | 56.6 | 1790 | 42 | 412 | 922 | 56.6 | 922 | 917.41 |
| 639.17 | -21.4 | -1.03 | 56.7 | 2000 | 46 | 374 | 948 | 56.7 | 948 | 943.28 |
| 639.48 | -21.4 | -1.03 | 56.7 | 2182 | 40 | 376 | 890 | 56.7 | 890 | 885.57 |
| 639.61 | -21.4 | -1.03 | 56.7 | 2254 | 50 | 400 | 914 | 56.7 | 914 | 909.45 |
| 639.95 | -21.5 | -1.03 | 56.7 | 2466 | 48 | 424 | 878 | 56.7 | 878 | 873.63 |
| 640.09 | -21.5 | -1.03 | 56.7 | 2336 | 52 | 396 | 796 | 56.7 | 796 | 792.04 |
| 640.32 | -21.5 | -1.03 | 56.8 | 2232 | 50 | 386 | 844 | 56.8 | 844 | 839.8  |
| 640.63 | -21.5 | -1.03 | 56.8 | 2128 | 32 | 376 | 772 | 56.8 | 772 | 768.16 |
| 640.76 | -21.5 | -1.03 | 56.8 | 2080 | 44 | 370 | 706 | 56.8 | 706 | 702.49 |
| 641.09 | -21.6 | -1.03 | 56.8 | 1898 | 40 | 418 | 716 | 56.8 | 716 | 712.44 |
| 641.26 | -21.6 | -1.03 | 56.8 | 1788 | 42 | 422 | 622 | 56.8 | 622 | 618.91 |
| 641.46 | -21.6 | -1.03 | 56.9 | 1684 | 30 | 404 | 550 | 56.9 | 550 | 547.26 |
| 641.87 | -21.6 | -1.03 | 56.9 | 1604 | 30 | 420 | 480 | 56.9 | 480 | 477.61 |
| 642.08 | -21.6 | -1.03 | 56.9 | 1364 | 32 | 370 | 488 | 56.9 | 488 | 485.57 |
| 642.4  | -21.6 | -1.03 | 56.9 | 1228 | 34 | 404 | 490 | 56.9 | 490 | 487.56 |

|        |       |       |      |     |    |     |     |      |     |        |
|--------|-------|-------|------|-----|----|-----|-----|------|-----|--------|
| 642.64 | -21.7 | -1.03 | 56.9 | 988 | 32 | 454 | 398 | 56.9 | 398 | 396.02 |
| 642.84 | -21.7 | -1.03 | 57   | 888 | 34 | 394 | 432 | 57   | 432 | 429.85 |
| 643.16 | -21.7 | -1.03 | 57   | 732 | 44 | 390 | 396 | 57   | 396 | 394.03 |
| 643.29 | -21.7 | -1.03 | 57   | 610 | 40 | 384 | 360 | 57   | 360 | 358.21 |
| 643.57 | -21.7 | -1.03 | 57   | 482 | 30 | 392 | 330 | 57   | 330 | 328.36 |
| 643.8  | -21.7 | -1.03 | 57   | 424 | 42 | 406 | 318 | 57   | 318 | 316.42 |
| 643.97 | -21.7 | -1.03 | 57.1 | 400 | 32 | 384 | 280 | 57.1 | 280 | 278.61 |
| 644.29 | -21.8 | -1.03 | 57.1 | 282 | 40 | 384 | 314 | 57.1 | 314 | 312.44 |
| 644.45 | -21.8 | -1.03 | 57.1 | 264 | 24 | 392 | 286 | 57.1 | 286 | 284.58 |
| 644.69 | -21.8 | -1.03 | 57.1 | 226 | 20 | 362 | 282 | 57.1 | 282 | 280.6  |
| 644.99 | -21.8 | -1.03 | 57.1 | 212 | 22 | 390 | 300 | 57.1 | 300 | 298.51 |
| 645.24 | -21.8 | -1.03 | 57.2 | 182 | 24 | 362 | 246 | 57.2 | 246 | 244.78 |
| 645.62 | -21.9 | -1.03 | 57.2 | 160 | 26 | 372 | 262 | 57.2 | 262 | 260.7  |
| 645.81 | -21.9 | -1.03 | 57.2 | 180 | 18 | 420 | 242 | 57.2 | 242 | 240.8  |
| 646.07 | -21.9 | -1.03 | 57.2 | 140 | 26 | 390 | 206 | 57.2 | 206 | 204.98 |
| 646.34 | -21.9 | -1.03 | 57.2 | 124 | 30 | 408 | 252 | 57.2 | 252 | 250.75 |
| 646.49 | -21.9 | -1.03 | 57.3 | 106 | 20 | 406 | 216 | 57.3 | 216 | 214.93 |
| 646.78 | -21.9 | -1.03 | 57.3 | 104 | 20 | 400 | 228 | 57.3 | 228 | 226.87 |
| 646.98 | -22   | -1.03 | 57.3 | 114 | 18 | 414 | 208 | 57.3 | 208 | 206.97 |
| 647.22 | -22   | -1.03 | 57.3 | 110 | 20 | 400 | 222 | 57.3 | 222 | 220.9  |
| 647.51 | -22   | -1.03 | 57.3 | 88  | 16 | 384 | 208 | 57.3 | 208 | 206.97 |
| 647.68 | -22   | -1.03 | 57.4 | 88  | 24 | 358 | 214 | 57.4 | 214 | 212.94 |
| 647.97 | -22   | -1.03 | 57.4 | 76  | 22 | 356 | 216 | 57.4 | 216 | 214.93 |
| 648.15 | -22.1 | -1.03 | 57.4 | 88  | 24 | 368 | 212 | 57.4 | 212 | 210.95 |
| 648.49 | -22.1 | -1.03 | 57.4 | 80  | 14 | 358 | 200 | 57.4 | 200 | 199    |
| 648.83 | -22.1 | -1.03 | 57.4 | 72  | 26 | 424 | 178 | 57.4 | 178 | 177.11 |
| 649.02 | -22.1 | -1.03 | 57.5 | 66  | 22 | 368 | 174 | 57.5 | 174 | 173.13 |
| 649.37 | -22.1 | -1.03 | 57.5 | 80  | 20 | 398 | 184 | 57.5 | 184 | 183.08 |
| 649.55 | -22.2 | -1.03 | 57.5 | 56  | 18 | 404 | 200 | 57.5 | 200 | 199    |
| 649.75 | -22.2 | -1.03 | 57.5 | 60  | 18 | 410 | 202 | 57.5 | 202 | 201    |
| 650.03 | -22.2 | -1.03 | 57.5 | 58  | 20 | 384 | 186 | 57.5 | 186 | 185.07 |
| 650.18 | -22.2 | -1.03 | 57.6 | 48  | 20 | 400 | 202 | 57.6 | 202 | 201    |
| 650.46 | -22.2 | -1.03 | 57.6 | 54  | 24 | 368 | 192 | 57.6 | 192 | 191.04 |
| 650.7  | -22.3 | -1.03 | 57.6 | 52  | 10 | 420 | 184 | 57.6 | 184 | 183.08 |
| 650.86 | -22.3 | -1.03 | 57.6 | 58  | 16 | 380 | 158 | 57.6 | 158 | 157.21 |
| 651.18 | -22.3 | -1.03 | 57.6 | 52  | 16 | 404 | 150 | 57.6 | 150 | 149.25 |
| 651.28 | -22.3 | -1.03 | 57.7 | 52  | 10 | 366 | 182 | 57.7 | 182 | 181.09 |
| 651.61 | -22.3 | -1.03 | 57.7 | 46  | 16 | 408 | 160 | 57.7 | 160 | 159.2  |
| 651.95 | -22.4 | -1.03 | 57.7 | 58  | 18 | 406 | 174 | 57.7 | 174 | 173.13 |
| 652.13 | -22.4 | -1.03 | 57.7 | 42  | 18 | 380 | 132 | 57.7 | 132 | 131.34 |
| 652.48 | -22.4 | -1.03 | 57.7 | 50  | 22 | 376 | 166 | 57.7 | 166 | 165.17 |
| 652.64 | -22.4 | -1.03 | 57.8 | 36  | 18 | 416 | 166 | 57.8 | 166 | 165.17 |
| 652.87 | -22.4 | -1.03 | 57.8 | 40  | 18 | 392 | 168 | 57.8 | 168 | 167.16 |
| 653.11 | -22.5 | -1.03 | 57.8 | 40  | 18 | 416 | 176 | 57.8 | 176 | 175.12 |
| 653.23 | -22.5 | -1.03 | 57.8 | 38  | 14 | 396 | 144 | 57.8 | 144 | 143.28 |
| 653.57 | -22.5 | -1.03 | 57.8 | 48  | 12 | 386 | 140 | 57.8 | 140 | 139.3  |
| 653.71 | -22.5 | -1.03 | 57.9 | 46  | 8  | 396 | 142 | 57.9 | 142 | 141.29 |

|        |       |       |      |    |    |     |     |      |     |        |
|--------|-------|-------|------|----|----|-----|-----|------|-----|--------|
| 653.93 | -22.5 | -1.03 | 57.9 | 46 | 12 | 448 | 164 | 57.9 | 164 | 163.18 |
| 654.23 | -22.6 | -1.03 | 57.9 | 52 | 18 | 374 | 168 | 57.9 | 168 | 167.16 |
| 654.33 | -22.6 | -1.03 | 57.9 | 50 | 24 | 416 | 154 | 57.9 | 154 | 153.23 |
| 654.68 | -22.6 | -1.03 | 57.9 | 32 | 10 | 386 | 148 | 57.9 | 148 | 147.26 |
| 654.96 | -22.6 | -1.03 | 58   | 34 | 16 | 438 | 148 | 58   | 148 | 147.26 |
| 655.17 | -22.6 | -1.03 | 58   | 46 | 18 | 428 | 164 | 58   | 164 | 163.18 |
| 655.51 | -22.7 | -1.03 | 58   | 28 | 12 | 458 | 150 | 58   | 150 | 149.25 |
| 655.66 | -22.7 | -1.03 | 58   | 42 | 26 | 482 | 162 | 58   | 162 | 161.19 |
| 655.95 | -22.7 | -1.03 | 58   | 42 | 24 | 438 | 150 | 58   | 150 | 149.25 |
| 656.14 | -22.7 | -1.03 | 58.1 | 50 | 16 | 482 | 152 | 58.1 | 152 | 151.24 |
| 656.28 | -22.7 | -1.03 | 58.1 | 42 | 14 | 526 | 156 | 58.1 | 156 | 155.22 |
| 656.61 | -22.7 | -1.03 | 58.1 | 42 | 16 | 476 | 166 | 58.1 | 166 | 165.17 |
| 656.74 | -22.7 | -1.03 | 58.1 | 32 | 22 | 516 | 158 | 58.1 | 158 | 157.21 |
| 656.99 | -22.8 | -1.03 | 58.1 | 38 | 18 | 516 | 160 | 58.1 | 160 | 159.2  |
| 657.24 | -22.8 | -1.03 | 58.2 | 34 | 14 | 586 | 154 | 58.2 | 154 | 153.23 |
| 657.37 | -22.8 | -1.03 | 58.2 | 36 | 18 | 572 | 158 | 58.2 | 158 | 157.21 |
| 657.69 | -22.8 | -1.03 | 58.2 | 32 | 14 | 644 | 148 | 58.2 | 148 | 147.26 |
| 657.94 | -22.8 | -1.03 | 58.2 | 40 | 20 | 674 | 182 | 58.2 | 182 | 181.09 |
| 658.22 | -22.9 | -1.03 | 58.2 | 42 | 18 | 706 | 184 | 58.2 | 184 | 183.08 |
| 658.51 | -22.9 | -1.03 | 58.3 | 40 | 14 | 730 | 192 | 58.3 | 192 | 191.04 |
| 658.68 | -22.9 | -1.03 | 58.3 | 40 | 18 | 802 | 162 | 58.3 | 162 | 161.19 |
| 659    | -22.9 | -1.03 | 58.3 | 32 | 16 | 814 | 182 | 58.3 | 182 | 181.09 |
| 659.16 | -23   | -1.03 | 58.3 | 34 | 16 | 882 | 172 | 58.3 | 172 | 171.14 |
| 659.35 | -23   | -1.03 | 58.3 | 26 | 24 | 910 | 172 | 58.3 | 172 | 171.14 |
| 659.61 | -23   | -1.03 | 58.4 | 38 | 16 | 982 | 158 | 58.4 | 158 | 157.21 |
| 659.77 | -23   | -1.03 | 58.4 | 36 | 18 | 938 | 184 | 58.4 | 184 | 183.08 |
| 660.09 | -23.1 | -1.03 | 58.4 | 32 | 20 | 958 | 166 | 58.4 | 166 | 165.17 |
| 660.27 | -23.1 | -1.03 | 58.4 | 34 | 12 | 968 | 164 | 58.4 | 164 | 163.18 |
| 660.48 | -23.2 | -1.03 | 58.4 | 32 | 16 | 964 | 150 | 58.4 | 150 | 149.25 |
| 660.74 | -23.2 | -1.03 | 58.5 | 34 | 20 | 896 | 176 | 58.5 | 176 | 175.12 |
| 660.94 | -23.2 | -1.03 | 58.5 | 42 | 16 | 874 | 182 | 58.5 | 182 | 181.09 |
| 661.35 | -23.3 | -1.03 | 58.5 | 36 | 20 | 872 | 160 | 58.5 | 160 | 159.2  |
| 661.57 | -23.3 | -1.03 | 58.5 | 44 | 22 | 804 | 172 | 58.5 | 172 | 171.14 |
| 661.8  | -23.4 | -1.03 | 58.5 | 32 | 22 | 834 | 156 | 58.5 | 156 | 155.22 |
| 662.13 | -23.4 | -1.03 | 58.6 | 32 | 18 | 796 | 166 | 58.6 | 166 | 165.17 |
| 662.26 | -23.4 | -1.03 | 58.6 | 26 | 16 | 722 | 132 | 58.6 | 132 | 131.34 |
| 662.56 | -23.5 | -1.03 | 58.6 | 40 | 32 | 744 | 142 | 58.6 | 142 | 141.29 |
| 662.74 | -23.5 | -1.03 | 58.6 | 36 | 18 | 668 | 134 | 58.6 | 134 | 133.33 |
| 662.95 | -23.6 | -1.03 | 58.6 | 24 | 34 | 620 | 132 | 58.6 | 132 | 131.34 |
| 663.28 | -23.6 | -1.03 | 58.7 | 20 | 22 | 582 | 136 | 58.7 | 136 | 135.32 |
| 663.44 | -23.6 | -1.03 | 58.7 | 24 | 24 | 572 | 154 | 58.7 | 154 | 153.23 |
| 663.74 | -23.7 | -1.03 | 58.7 | 30 | 24 | 528 | 140 | 58.7 | 140 | 139.3  |
| 663.93 | -23.7 | -1.03 | 58.7 | 38 | 22 | 550 | 126 | 58.7 | 126 | 125.37 |
| 664.13 | -23.7 | -1.03 | 58.7 | 30 | 20 | 450 | 116 | 58.7 | 116 | 115.42 |
| 664.57 | -23.8 | -1.03 | 58.8 | 38 | 20 | 440 | 146 | 58.8 | 146 | 145.27 |
| 664.75 | -23.8 | -1.03 | 58.8 | 42 | 14 | 444 | 142 | 58.8 | 142 | 141.29 |
| 665.05 | -23.8 | -1.03 | 58.8 | 28 | 20 | 434 | 118 | 58.8 | 118 | 117.41 |

|        |       |       |      |    |    |     |     |      |     |        |
|--------|-------|-------|------|----|----|-----|-----|------|-----|--------|
| 665.34 | -23.9 | -1.03 | 58.8 | 36 | 34 | 440 | 136 | 58.8 | 136 | 135.32 |
| 665.49 | -23.9 | -1.03 | 58.8 | 36 | 24 | 410 | 118 | 58.8 | 118 | 117.41 |
| 665.84 | -23.9 | -1.03 | 58.9 | 34 | 22 | 394 | 128 | 58.9 | 128 | 127.36 |
| 665.97 | -23.9 | -1.03 | 58.9 | 34 | 28 | 398 | 112 | 58.9 | 112 | 111.44 |
| 666.21 | -24   | -1.03 | 58.9 | 36 | 20 | 434 | 128 | 58.9 | 128 | 127.36 |
| 666.5  | -24   | -1.03 | 58.9 | 42 | 32 | 414 | 144 | 58.9 | 144 | 143.28 |
| 666.64 | -24   | -1.03 | 58.9 | 26 | 28 | 418 | 136 | 58.9 | 136 | 135.32 |
| 666.99 | -24.1 | -1.03 | 59   | 28 | 34 | 416 | 116 | 59   | 116 | 115.42 |
| 667.16 | -24.1 | -1.03 | 59   | 38 | 26 | 416 | 122 | 59   | 122 | 121.39 |
| 667.36 | -24.1 | -1.03 | 59   | 32 | 28 | 408 | 144 | 59   | 144 | 143.28 |
| 667.74 | -24.2 | -1.03 | 59   | 30 | 22 | 396 | 120 | 59   | 120 | 119.4  |
| 667.96 | -24.2 | -1.03 | 59   | 42 | 26 | 408 | 114 | 59   | 114 | 113.43 |
| 668.31 | -24.2 | -1.03 | 59.1 | 36 | 20 | 384 | 128 | 59.1 | 128 | 127.36 |
| 668.53 | -24.2 | -1.03 | 59.1 | 32 | 30 | 386 | 136 | 59.1 | 136 | 135.32 |
| 668.73 | -24.3 | -1.03 | 59.1 | 38 | 26 | 372 | 140 | 59.1 | 140 | 139.3  |
| 669.07 | -24.3 | -1.03 | 59.1 | 20 | 24 | 386 | 98  | 59.1 | 98  | 97.512 |
| 669.18 | -24.3 | -1.03 | 59.1 | 42 | 30 | 376 | 102 | 59.1 | 102 | 101.49 |
| 669.47 | -24.3 | -1.03 | 59.2 | 38 | 42 | 418 | 106 | 59.2 | 106 | 105.47 |
| 669.69 | -24.4 | -1.03 | 59.2 | 22 | 26 | 396 | 106 | 59.2 | 106 | 105.47 |
| 669.88 | -24.4 | -1.03 | 59.2 | 28 | 26 | 406 | 118 | 59.2 | 118 | 117.41 |
| 670.2  | -24.4 | -1.03 | 59.2 | 38 | 34 | 380 | 132 | 59.2 | 132 | 131.34 |
| 670.36 | -24.4 | -1.03 | 59.2 | 40 | 28 | 408 | 130 | 59.2 | 130 | 129.35 |
| 670.62 | -24.4 | -1.03 | 59.3 | 34 | 30 | 388 | 130 | 59.3 | 130 | 129.35 |
| 670.88 | -24.4 | -1.03 | 59.3 | 30 | 44 | 366 | 100 | 59.3 | 100 | 99.502 |
| 671.16 | -24.5 | -1.03 | 59.3 | 42 | 30 | 380 | 114 | 59.3 | 114 | 113.43 |
| 671.53 | -24.5 | -1.03 | 59.3 | 32 | 40 | 352 | 114 | 59.3 | 114 | 113.43 |
| 671.7  | -24.5 | -1.03 | 59.3 | 38 | 38 | 408 | 112 | 59.3 | 112 | 111.44 |
| 671.98 | -24.5 | -1.03 | 59.4 | 40 | 48 | 398 | 114 | 59.4 | 114 | 113.43 |
| 672.24 | -24.5 | -1.03 | 59.4 | 26 | 32 | 380 | 130 | 59.4 | 130 | 129.35 |
| 672.38 | -24.5 | -1.03 | 59.4 | 42 | 32 | 370 | 102 | 59.4 | 102 | 101.49 |
| 672.68 | -24.5 | -1.03 | 59.4 | 32 | 34 | 414 | 108 | 59.4 | 108 | 107.46 |
| 672.86 | -24.6 | -1.03 | 59.4 | 24 | 56 | 398 | 126 | 59.4 | 126 | 125.37 |
| 673.1  | -24.6 | -1.03 | 59.5 | 30 | 46 | 360 | 102 | 59.5 | 102 | 101.49 |
| 673.35 | -24.6 | -1.03 | 59.5 | 32 | 48 | 384 | 132 | 59.5 | 132 | 131.34 |
| 673.52 | -24.6 | -1.03 | 59.5 | 26 | 46 | 378 | 116 | 59.5 | 116 | 115.42 |
| 673.82 | -24.6 | -1.03 | 59.5 | 24 | 40 | 366 | 124 | 59.5 | 124 | 123.38 |
| 673.97 | -24.6 | -1.03 | 59.5 | 24 | 42 | 384 | 118 | 59.5 | 118 | 117.41 |
| 674.29 | -24.6 | -1.03 | 59.6 | 32 | 54 | 400 | 120 | 59.6 | 120 | 119.4  |
| 674.61 | -24.6 | -1.03 | 59.6 | 32 | 60 | 392 | 134 | 59.6 | 134 | 133.33 |
| 674.79 | -24.7 | -1.03 | 59.6 | 34 | 46 | 372 | 112 | 59.6 | 112 | 111.44 |
| 675.16 | -24.7 | -1.03 | 59.6 | 28 | 52 | 390 | 106 | 59.6 | 106 | 105.47 |
| 675.31 | -24.7 | -1.03 | 59.6 | 26 | 56 | 402 | 116 | 59.6 | 116 | 115.42 |
| 675.53 | -24.7 | -1.03 | 59.7 | 34 | 46 | 370 | 118 | 59.7 | 118 | 117.41 |
| 675.8  | -24.7 | -1.03 | 59.7 | 26 | 68 | 384 | 118 | 59.7 | 118 | 117.41 |
| 675.93 | -24.8 | -1.03 | 59.7 | 34 | 60 | 358 | 102 | 59.7 | 102 | 101.49 |
| 676.24 | -24.8 | -1.03 | 59.7 | 28 | 76 | 354 | 108 | 59.7 | 108 | 107.46 |
| 676.44 | -24.8 | -1.03 | 59.7 | 28 | 66 | 394 | 100 | 59.7 | 100 | 99.502 |

|        |       |       |      |    |     |     |     |      |     |        |
|--------|-------|-------|------|----|-----|-----|-----|------|-----|--------|
| 676.62 | -24.8 | -1.03 | 59.8 | 40 | 82  | 348 | 104 | 59.8 | 104 | 103.48 |
| 676.93 | -24.8 | -1.03 | 59.8 | 22 | 80  | 358 | 120 | 59.8 | 120 | 119.4  |
| 677.05 | -24.9 | -1.03 | 59.8 | 30 | 92  | 368 | 118 | 59.8 | 118 | 117.41 |
| 677.39 | -24.9 | -1.03 | 59.8 | 20 | 96  | 412 | 126 | 59.8 | 126 | 125.37 |
| 677.71 | -24.9 | -1.03 | 59.8 | 38 | 100 | 362 | 102 | 59.8 | 102 | 101.49 |
| 677.91 | -24.9 | -1.03 | 59.9 | 40 | 108 | 370 | 112 | 59.9 | 112 | 111.44 |
| 678.26 | -25   | -1.03 | 59.9 | 44 | 128 | 432 | 128 | 59.9 | 128 | 127.36 |
| 678.42 | -25   | -1.03 | 59.9 | 28 | 134 | 350 | 110 | 59.9 | 110 | 109.45 |
| 678.68 | -25   | -1.03 | 59.9 | 38 | 132 | 364 | 118 | 59.9 | 118 | 117.41 |
| 678.91 | -25   | -1.03 | 59.9 | 26 | 128 | 372 | 116 | 59.9 | 116 | 115.42 |
| 679.04 | -25.1 | -1.03 | 60   | 24 | 150 | 368 | 114 | 60   | 114 | 113.43 |
| 679.4  | -25.1 | -1.03 | 60   | 20 | 150 | 396 | 102 | 60   | 102 | 101.49 |
| 679.55 | -25.1 | -1.03 | 60   | 26 | 148 | 342 | 118 | 60   | 118 | 117.41 |
| 679.77 | -25.1 | -1.03 | 60   | 26 | 162 | 404 | 114 | 60   | 114 | 113.43 |
| 680.04 | -25.2 | -1.03 | 60   | 32 | 164 | 392 | 124 | 60   | 124 | 123.38 |
| 680.16 | -25.2 | -1.03 | 60.1 | 22 | 138 | 388 | 114 | 60.1 | 114 | 113.43 |
| 680.53 | -25.2 | -1.03 | 60.1 | 22 | 150 | 390 | 120 | 60.1 | 120 | 119.4  |
| 680.8  | -25.2 | -1.03 | 60.1 | 32 | 150 | 374 | 114 | 60.1 | 114 | 113.43 |
| 681.05 | -25.3 | -1.03 | 60.1 | 32 | 146 | 368 | 112 | 60.1 | 112 | 111.44 |
| 681.38 | -25.3 | -1.03 | 60.1 | 22 | 160 | 362 | 114 | 60.1 | 114 | 113.43 |
| 681.55 | -25.3 | -1.03 | 60.2 | 22 | 140 | 372 | 130 | 60.2 | 130 | 129.35 |
| 681.86 | -25.4 | -1.03 | 60.2 | 32 | 126 | 354 | 108 | 60.2 | 108 | 107.46 |
| 682.04 | -25.4 | -1.03 | 60.2 | 34 | 128 | 392 | 126 | 60.2 | 126 | 125.37 |
| 682.2  | -25.4 | -1.03 | 60.2 | 28 | 122 | 356 | 124 | 60.2 | 124 | 123.38 |
| 682.52 | -25.4 | -1.03 | 60.2 | 22 | 100 | 370 | 130 | 60.2 | 130 | 129.35 |
| 682.66 | -25.5 | -1.03 | 60.3 | 22 | 100 | 330 | 122 | 60.3 | 122 | 121.39 |
| 682.96 | -25.5 | -1.03 | 60.3 | 46 | 104 | 376 | 92  | 60.3 | 92  | 91.542 |
| 683.18 | -25.5 | -1.03 | 60.3 | 28 | 94  | 352 | 128 | 60.3 | 128 | 127.36 |
| 683.36 | -25.6 | -1.03 | 60.3 | 32 | 118 | 390 | 104 | 60.3 | 104 | 103.48 |
| 683.66 | -25.6 | -1.03 | 60.3 | 24 | 90  | 342 | 130 | 60.3 | 130 | 129.35 |
| 683.9  | -25.6 | -1.03 | 60.4 | 34 | 88  | 358 | 136 | 60.4 | 136 | 135.32 |
| 684.24 | -25.7 | -1.03 | 60.4 | 32 | 86  | 382 | 118 | 60.4 | 118 | 117.41 |
| 684.48 | -25.7 | -1.03 | 60.4 | 44 | 62  | 364 | 120 | 60.4 | 120 | 119.4  |
| 684.67 | -25.7 | -1.03 | 60.4 | 32 | 72  | 404 | 102 | 60.4 | 102 | 101.49 |
| 685.01 | -25.8 | -1.03 | 60.4 | 22 | 58  | 420 | 114 | 60.4 | 114 | 113.43 |
| 685.14 | -25.8 | -1.03 | 60.5 | 38 | 60  | 412 | 92  | 60.5 | 92  | 91.542 |
| 685.37 | -25.8 | -1.03 | 60.5 | 24 | 60  | 376 | 134 | 60.5 | 134 | 133.33 |
| 685.58 | -25.9 | -1.03 | 60.5 | 32 | 50  | 380 | 114 | 60.5 | 114 | 113.43 |
| 685.75 | -25.9 | -1.03 | 60.5 | 32 | 46  | 348 | 112 | 60.5 | 112 | 111.44 |
| 686.1  | -25.9 | -1.03 | 60.5 | 34 | 46  | 384 | 120 | 60.5 | 120 | 119.4  |
| 686.24 | -25.9 | -1.03 | 60.6 | 34 | 46  | 368 | 104 | 60.6 | 104 | 103.48 |
| 686.48 | -26   | -1.03 | 60.6 | 34 | 42  | 400 | 108 | 60.6 | 108 | 107.46 |
| 686.72 | -26   | -1.03 | 60.6 | 26 | 46  | 384 | 108 | 60.6 | 108 | 107.46 |
| 686.9  | -26   | -1.03 | 60.6 | 28 | 34  | 392 | 134 | 60.6 | 134 | 133.33 |
| 687.34 | -26.1 | -1.03 | 60.6 | 26 | 32  | 396 | 98  | 60.6 | 98  | 97.512 |
| 687.53 | -26.1 | -1.03 | 60.7 | 38 | 44  | 382 | 108 | 60.7 | 108 | 107.46 |
| 687.79 | -26.1 | -1.03 | 60.7 | 22 | 42  | 392 | 106 | 60.7 | 106 | 105.47 |

|        |       |       |      |    |    |      |     |      |     |        |
|--------|-------|-------|------|----|----|------|-----|------|-----|--------|
| 688.08 | -26.2 | -1.03 | 60.7 | 30 | 38 | 358  | 108 | 60.7 | 108 | 107.46 |
| 688.22 | -26.2 | -1.03 | 60.7 | 34 | 30 | 404  | 116 | 60.7 | 116 | 115.42 |
| 688.53 | -26.2 | -1.03 | 60.7 | 38 | 30 | 396  | 112 | 60.7 | 112 | 111.44 |
| 688.67 | -26.3 | -1.03 | 60.8 | 34 | 34 | 390  | 114 | 60.8 | 114 | 113.43 |
| 688.9  | -26.3 | -1.03 | 60.8 | 24 | 40 | 392  | 106 | 60.8 | 106 | 105.47 |
| 689.21 | -26.3 | -1.03 | 60.8 | 30 | 34 | 378  | 100 | 60.8 | 100 | 99.502 |
| 689.35 | -26.4 | -1.03 | 60.8 | 34 | 20 | 338  | 122 | 60.8 | 122 | 121.39 |
| 689.68 | -26.4 | -1.03 | 60.8 | 30 | 28 | 380  | 128 | 60.8 | 128 | 127.36 |
| 689.84 | -26.4 | -1.03 | 60.9 | 30 | 26 | 404  | 118 | 60.9 | 118 | 117.41 |
| 690.04 | -26.5 | -1.03 | 60.9 | 42 | 22 | 372  | 120 | 60.9 | 120 | 119.4  |
| 690.46 | -26.5 | -1.03 | 60.9 | 26 | 34 | 388  | 104 | 60.9 | 104 | 103.48 |
| 690.65 | -26.5 | -1.03 | 60.9 | 26 | 28 | 382  | 110 | 60.9 | 110 | 109.45 |
| 690.98 | -26.6 | -1.03 | 60.9 | 30 | 22 | 398  | 104 | 60.9 | 104 | 103.48 |
| 691.23 | -26.6 | -1.03 | 61   | 42 | 28 | 386  | 134 | 61   | 134 | 133.33 |
| 691.41 | -26.6 | -1.03 | 61   | 38 | 28 | 392  | 120 | 61   | 120 | 119.4  |
| 691.75 | -26.7 | -1.03 | 61   | 24 | 14 | 410  | 110 | 61   | 110 | 109.45 |
| 691.87 | -26.7 | -1.03 | 61   | 32 | 18 | 426  | 122 | 61   | 122 | 121.39 |
| 692.13 | -26.7 | -1.03 | 61   | 42 | 22 | 386  | 128 | 61   | 128 | 127.36 |
| 692.4  | -26.7 | -1.03 | 61.1 | 46 | 12 | 398  | 132 | 61.1 | 132 | 131.34 |
| 692.57 | -26.8 | -1.03 | 61.1 | 30 | 20 | 412  | 138 | 61.1 | 138 | 137.31 |
| 692.9  | -26.8 | -1.03 | 61.1 | 30 | 18 | 384  | 126 | 61.1 | 126 | 125.37 |
| 693.05 | -26.8 | -1.03 | 61.1 | 32 | 28 | 414  | 126 | 61.1 | 126 | 125.37 |
| 693.28 | -26.8 | -1.03 | 61.1 | 36 | 10 | 438  | 142 | 61.1 | 142 | 141.29 |
| 693.61 | -26.9 | -1.03 | 61.2 | 32 | 28 | 446  | 124 | 61.2 | 124 | 123.38 |
| 693.86 | -26.9 | -1.03 | 61.2 | 26 | 16 | 426  | 120 | 61.2 | 120 | 119.4  |
| 694.22 | -26.9 | -1.03 | 61.2 | 26 | 22 | 388  | 126 | 61.2 | 126 | 125.37 |
| 694.41 | -26.9 | -1.03 | 61.2 | 28 | 24 | 442  | 138 | 61.2 | 138 | 137.31 |
| 694.67 | -27   | -1.03 | 61.2 | 46 | 16 | 462  | 150 | 61.2 | 150 | 149.25 |
| 694.96 | -27   | -1.03 | 61.3 | 40 | 12 | 444  | 140 | 61.3 | 140 | 139.3  |
| 695.09 | -27   | -1.03 | 61.3 | 38 | 20 | 454  | 126 | 61.3 | 126 | 125.37 |
| 695.41 | -27.1 | -1.03 | 61.3 | 28 | 18 | 466  | 138 | 61.3 | 138 | 137.31 |
| 695.6  | -27.1 | -1.03 | 61.3 | 32 | 14 | 538  | 144 | 61.3 | 144 | 143.28 |
| 695.82 | -27.1 | -1.03 | 61.3 | 40 | 18 | 518  | 146 | 61.3 | 146 | 145.27 |
| 696.13 | -27.1 | -1.03 | 61.4 | 38 | 16 | 568  | 146 | 61.4 | 146 | 145.27 |
| 696.27 | -27.2 | -1.03 | 61.4 | 32 | 8  | 582  | 154 | 61.4 | 154 | 153.23 |
| 696.54 | -27.2 | -1.03 | 61.4 | 30 | 16 | 626  | 176 | 61.4 | 176 | 175.12 |
| 696.76 | -27.2 | -1.03 | 61.4 | 34 | 16 | 648  | 156 | 61.4 | 156 | 155.22 |
| 697.06 | -27.3 | -1.03 | 61.4 | 26 | 14 | 702  | 162 | 61.4 | 162 | 161.19 |
| 697.4  | -27.3 | -1.03 | 61.5 | 40 | 6  | 764  | 154 | 61.5 | 154 | 153.23 |
| 697.59 | -27.3 | -1.03 | 61.5 | 52 | 18 | 834  | 170 | 61.5 | 170 | 169.15 |
| 697.89 | -27.3 | -1.03 | 61.5 | 30 | 12 | 906  | 164 | 61.5 | 164 | 163.18 |
| 698.12 | -27.4 | -1.03 | 61.5 | 42 | 10 | 954  | 176 | 61.5 | 176 | 175.12 |
| 698.32 | -27.4 | -1.03 | 61.5 | 38 | 14 | 1006 | 186 | 61.5 | 186 | 185.07 |
| 698.6  | -27.4 | -1.03 | 61.6 | 34 | 12 | 1174 | 184 | 61.6 | 184 | 183.08 |
| 698.73 | -27.4 | -1.03 | 61.6 | 34 | 14 | 1144 | 172 | 61.6 | 172 | 171.14 |
| 699.02 | -27.5 | -1.03 | 61.6 | 38 | 10 | 1234 | 190 | 61.6 | 190 | 189.05 |
| 699.24 | -27.2 | -1.03 | 61.6 | 40 | 12 | 1246 | 194 | 61.6 | 194 | 193.03 |

|        |       |       |      |     |    |      |     |      |     |        |
|--------|-------|-------|------|-----|----|------|-----|------|-----|--------|
| 699.4  | -27.2 | -1.03 | 61.6 | 36  | 16 | 1302 | 194 | 61.6 | 194 | 193.03 |
| 699.73 | -27.2 | -1.03 | 61.7 | 34  | 12 | 1270 | 170 | 61.7 | 170 | 169.15 |
| 699.84 | -27.3 | -1.03 | 61.7 | 40  | 14 | 1236 | 214 | 61.7 | 214 | 212.94 |
| 700.15 | -27.3 | -1.03 | 61.7 | 46  | 14 | 1128 | 178 | 61.7 | 178 | 177.11 |
| 700.5  | -27.3 | -1.03 | 61.7 | 44  | 22 | 1108 | 184 | 61.7 | 184 | 183.08 |
| 700.67 | -27.3 | -1.03 | 61.7 | 34  | 6  | 1090 | 174 | 61.7 | 174 | 173.13 |
|        |       |       | 61.8 | 36  | 16 | 1072 | 188 | 61.8 | 188 | 187.06 |
|        |       |       | 61.8 | 48  | 16 | 1078 | 184 | 61.8 | 184 | 183.08 |
|        |       |       | 61.8 | 48  | 8  | 962  | 156 | 61.8 | 156 | 155.22 |
|        |       |       | 61.8 | 38  | 18 | 932  | 184 | 61.8 | 184 | 183.08 |
|        |       |       | 61.8 | 38  | 16 | 842  | 168 | 61.8 | 168 | 167.16 |
|        |       |       | 61.9 | 36  | 18 | 778  | 172 | 61.9 | 172 | 171.14 |
|        |       |       | 61.9 | 38  | 10 | 744  | 150 | 61.9 | 150 | 149.25 |
|        |       |       | 61.9 | 40  | 18 | 688  | 160 | 61.9 | 160 | 159.2  |
|        |       |       | 61.9 | 40  | 10 | 628  | 158 | 61.9 | 158 | 157.21 |
|        |       |       | 61.9 | 44  | 16 | 598  | 164 | 61.9 | 164 | 163.18 |
|        |       |       | 62   | 40  | 10 | 556  | 176 | 62   | 176 | 175.12 |
|        |       |       | 62   | 44  | 14 | 578  | 192 | 62   | 192 | 191.04 |
|        |       |       | 62   | 50  | 14 | 532  | 158 | 62   | 158 | 157.21 |
|        |       |       | 62   | 34  | 12 | 520  | 146 | 62   | 146 | 145.27 |
|        |       |       | 62   | 50  | 16 | 440  | 166 | 62   | 166 | 165.17 |
|        |       |       | 62.1 | 42  | 18 | 492  | 158 | 62.1 | 158 | 157.21 |
|        |       |       | 62.1 | 40  | 18 | 454  | 162 | 62.1 | 162 | 161.19 |
|        |       |       | 62.1 | 40  | 14 | 454  | 164 | 62.1 | 164 | 163.18 |
|        |       |       | 62.1 | 30  | 16 | 454  | 174 | 62.1 | 174 | 173.13 |
|        |       |       | 62.1 | 54  | 8  | 446  | 188 | 62.1 | 188 | 187.06 |
|        |       |       | 62.2 | 54  | 16 | 424  | 186 | 62.2 | 186 | 185.07 |
|        |       |       | 62.2 | 60  | 10 | 434  | 170 | 62.2 | 170 | 169.15 |
|        |       |       | 62.2 | 64  | 10 | 398  | 188 | 62.2 | 188 | 187.06 |
|        |       |       | 62.2 | 56  | 14 | 422  | 196 | 62.2 | 196 | 195.02 |
|        |       |       | 62.2 | 52  | 10 | 426  | 194 | 62.2 | 194 | 193.03 |
|        |       |       | 62.3 | 74  | 10 | 410  | 194 | 62.3 | 194 | 193.03 |
|        |       |       | 62.3 | 58  | 12 | 428  | 218 | 62.3 | 218 | 216.92 |
|        |       |       | 62.3 | 64  | 14 | 398  | 174 | 62.3 | 174 | 173.13 |
|        |       |       | 62.3 | 66  | 10 | 426  | 220 | 62.3 | 220 | 218.91 |
|        |       |       | 62.3 | 64  | 10 | 408  | 218 | 62.3 | 218 | 216.92 |
|        |       |       | 62.4 | 68  | 6  | 418  | 194 | 62.4 | 194 | 193.03 |
|        |       |       | 62.4 | 68  | 14 | 414  | 200 | 62.4 | 200 | 199    |
|        |       |       | 62.4 | 70  | 10 | 404  | 258 | 62.4 | 258 | 256.72 |
|        |       |       | 62.4 | 84  | 10 | 418  | 220 | 62.4 | 220 | 218.91 |
|        |       |       | 62.4 | 96  | 10 | 414  | 226 | 62.4 | 226 | 224.88 |
|        |       |       | 62.5 | 88  | 8  | 420  | 258 | 62.5 | 258 | 256.72 |
|        |       |       | 62.5 | 106 | 18 | 404  | 300 | 62.5 | 300 | 298.51 |
|        |       |       | 62.5 | 106 | 14 | 376  | 296 | 62.5 | 296 | 294.53 |
|        |       |       | 62.5 | 90  | 6  | 382  | 294 | 62.5 | 294 | 292.54 |
|        |       |       | 62.5 | 136 | 12 | 406  | 330 | 62.5 | 330 | 328.36 |
|        |       |       | 62.6 | 146 | 14 | 386  | 310 | 62.6 | 310 | 308.46 |

|      |      |    |     |     |      |     |        |
|------|------|----|-----|-----|------|-----|--------|
| 62.6 | 172  | 8  | 394 | 372 | 62.6 | 372 | 370.15 |
| 62.6 | 152  | 6  | 432 | 342 | 62.6 | 342 | 340.3  |
| 62.6 | 160  | 16 | 398 | 370 | 62.6 | 370 | 368.16 |
| 62.6 | 196  | 12 | 396 | 398 | 62.6 | 398 | 396.02 |
| 62.7 | 260  | 10 | 386 | 426 | 62.7 | 426 | 423.88 |
| 62.7 | 298  | 10 | 404 | 464 | 62.7 | 464 | 461.69 |
| 62.7 | 314  | 10 | 414 | 476 | 62.7 | 476 | 473.63 |
| 62.7 | 354  | 12 | 382 | 492 | 62.7 | 492 | 489.55 |
| 62.7 | 400  | 18 | 380 | 544 | 62.7 | 544 | 541.29 |
| 62.8 | 486  | 6  | 400 | 534 | 62.8 | 534 | 531.34 |
| 62.8 | 528  | 10 | 360 | 652 | 62.8 | 652 | 648.76 |
| 62.8 | 636  | 16 | 368 | 698 | 62.8 | 698 | 694.53 |
| 62.8 | 742  | 8  | 364 | 714 | 62.8 | 714 | 710.45 |
| 62.8 | 872  | 10 | 392 | 782 | 62.8 | 782 | 778.11 |
| 62.9 | 1114 | 12 | 384 | 798 | 62.9 | 798 | 794.03 |
| 62.9 | 1334 | 8  | 382 | 802 | 62.9 | 802 | 798.01 |
| 62.9 | 1548 | 10 | 356 | 818 | 62.9 | 818 | 813.93 |
| 62.9 | 1732 | 10 | 390 | 890 | 62.9 | 890 | 885.57 |
| 62.9 | 1854 | 14 | 400 | 888 | 62.9 | 888 | 883.58 |
| 63   | 2132 | 12 | 414 | 838 | 63   | 838 | 833.83 |
| 63   | 2148 | 6  | 350 | 798 | 63   | 798 | 794.03 |
| 63   | 2112 | 8  | 386 | 830 | 63   | 830 | 825.87 |
| 63   | 1940 | 12 | 354 | 782 | 63   | 782 | 778.11 |
| 63   | 1840 | 10 | 380 | 724 | 63   | 724 | 720.4  |
| 63.1 | 1710 | 4  | 412 | 704 | 63.1 | 704 | 700.5  |
| 63.1 | 1662 | 12 | 436 | 672 | 63.1 | 672 | 668.66 |
| 63.1 | 1492 | 16 | 352 | 656 | 63.1 | 656 | 652.74 |
| 63.1 | 1528 | 10 | 382 | 670 | 63.1 | 670 | 666.67 |
| 63.1 | 1444 | 12 | 372 | 576 | 63.1 | 576 | 573.13 |
| 63.2 | 1352 | 6  | 346 | 524 | 63.2 | 524 | 521.39 |
| 63.2 | 1174 | 10 | 402 | 510 | 63.2 | 510 | 507.46 |
| 63.2 | 1106 | 14 | 352 | 450 | 63.2 | 450 | 447.76 |
| 63.2 | 880  | 12 | 370 | 438 | 63.2 | 438 | 435.82 |
| 63.2 | 772  | 6  | 386 | 396 | 63.2 | 396 | 394.03 |
| 63.3 | 634  | 8  | 378 | 408 | 63.3 | 408 | 405.97 |
| 63.3 | 546  | 8  | 358 | 390 | 63.3 | 390 | 388.06 |
| 63.3 | 446  | 10 | 366 | 320 | 63.3 | 320 | 318.41 |
| 63.3 | 412  | 12 | 368 | 324 | 63.3 | 324 | 322.39 |
| 63.3 | 342  | 12 | 414 | 324 | 63.3 | 324 | 322.39 |
| 63.4 | 296  | 10 | 402 | 300 | 63.4 | 300 | 298.51 |
| 63.4 | 242  | 6  | 380 | 298 | 63.4 | 298 | 296.52 |
| 63.4 | 242  | 6  | 366 | 258 | 63.4 | 258 | 256.72 |
| 63.4 | 196  | 16 | 372 | 256 | 63.4 | 256 | 254.73 |
| 63.4 | 142  | 10 | 406 | 226 | 63.4 | 226 | 224.88 |
| 63.5 | 150  | 8  | 360 | 272 | 63.5 | 272 | 270.65 |
| 63.5 | 136  | 12 | 400 | 238 | 63.5 | 238 | 236.82 |
| 63.5 | 140  | 12 | 410 | 216 | 63.5 | 216 | 214.93 |

|      |     |    |     |     |      |     |        |
|------|-----|----|-----|-----|------|-----|--------|
| 63.5 | 124 | 8  | 442 | 228 | 63.5 | 228 | 226.87 |
| 63.5 | 116 | 10 | 418 | 212 | 63.5 | 212 | 210.95 |
| 63.6 | 116 | 6  | 360 | 182 | 63.6 | 182 | 181.09 |
| 63.6 | 98  | 12 | 382 | 212 | 63.6 | 212 | 210.95 |
| 63.6 | 88  | 14 | 340 | 214 | 63.6 | 214 | 212.94 |
| 63.6 | 94  | 8  | 332 | 192 | 63.6 | 192 | 191.04 |
| 63.6 | 70  | 10 | 388 | 210 | 63.6 | 210 | 208.96 |
| 63.7 | 86  | 16 | 438 | 210 | 63.7 | 210 | 208.96 |
| 63.7 | 60  | 12 | 366 | 188 | 63.7 | 188 | 187.06 |
| 63.7 | 62  | 16 | 354 | 190 | 63.7 | 190 | 189.05 |
| 63.7 | 80  | 14 | 370 | 166 | 63.7 | 166 | 165.17 |
| 63.7 | 80  | 6  | 406 | 190 | 63.7 | 190 | 189.05 |
| 63.8 | 68  | 12 | 366 | 174 | 63.8 | 174 | 173.13 |
| 63.8 | 68  | 8  | 382 | 182 | 63.8 | 182 | 181.09 |
| 63.8 | 50  | 22 | 374 | 168 | 63.8 | 168 | 167.16 |
| 63.8 | 58  | 14 | 380 | 156 | 63.8 | 156 | 155.22 |
| 63.8 | 60  | 4  | 384 | 156 | 63.8 | 156 | 155.22 |
| 63.9 | 60  | 8  | 370 | 174 | 63.9 | 174 | 173.13 |
| 63.9 | 60  | 12 | 366 | 158 | 63.9 | 158 | 157.21 |
| 63.9 | 60  | 8  | 386 | 158 | 63.9 | 158 | 157.21 |
| 63.9 | 42  | 14 | 382 | 154 | 63.9 | 154 | 153.23 |
| 63.9 | 58  | 6  | 362 | 152 | 63.9 | 152 | 151.24 |
| 64   | 58  | 16 | 402 | 162 | 64   | 162 | 161.19 |
| 64   | 52  | 10 | 400 | 172 | 64   | 172 | 171.14 |
| 64   | 32  | 12 | 372 | 158 | 64   | 158 | 157.21 |
| 64   | 58  | 10 | 394 | 152 | 64   | 152 | 151.24 |
| 64   | 58  | 10 | 374 | 164 | 64   | 164 | 163.18 |
| 64.1 | 44  | 10 | 374 | 148 | 64.1 | 148 | 147.26 |
| 64.1 | 48  | 14 | 360 | 140 | 64.1 | 140 | 139.3  |
| 64.1 | 36  | 8  | 354 | 146 | 64.1 | 146 | 145.27 |
| 64.1 | 52  | 6  | 376 | 130 | 64.1 | 130 | 129.35 |
| 64.1 | 50  | 10 | 380 | 152 | 64.1 | 152 | 151.24 |
| 64.2 | 52  | 8  | 384 | 142 | 64.2 | 142 | 141.29 |
| 64.2 | 56  | 10 | 380 | 152 | 64.2 | 152 | 151.24 |
| 64.2 | 42  | 10 | 384 | 128 | 64.2 | 128 | 127.36 |
| 64.2 | 46  | 12 | 374 | 126 | 64.2 | 126 | 125.37 |
| 64.2 | 46  | 10 | 386 | 142 | 64.2 | 142 | 141.29 |
| 64.3 | 40  | 20 | 380 | 132 | 64.3 | 132 | 131.34 |
| 64.3 | 54  | 14 | 382 | 138 | 64.3 | 138 | 137.31 |
| 64.3 | 40  | 10 | 382 | 118 | 64.3 | 118 | 117.41 |
| 64.3 | 44  | 18 | 378 | 104 | 64.3 | 104 | 103.48 |
| 64.3 | 44  | 6  | 396 | 130 | 64.3 | 130 | 129.35 |
| 64.4 | 42  | 16 | 380 | 128 | 64.4 | 128 | 127.36 |
| 64.4 | 32  | 6  | 404 | 142 | 64.4 | 142 | 141.29 |
| 64.4 | 34  | 12 | 398 | 126 | 64.4 | 126 | 125.37 |
| 64.4 | 30  | 10 | 376 | 124 | 64.4 | 124 | 123.38 |
| 64.4 | 40  | 16 | 380 | 122 | 64.4 | 122 | 121.39 |

|      |    |    |     |     |      |     |        |
|------|----|----|-----|-----|------|-----|--------|
| 64.5 | 30 | 10 | 372 | 120 | 64.5 | 120 | 119.4  |
| 64.5 | 36 | 10 | 418 | 96  | 64.5 | 96  | 95.522 |
| 64.5 | 38 | 20 | 406 | 122 | 64.5 | 122 | 121.39 |
| 64.5 | 38 | 20 | 426 | 100 | 64.5 | 100 | 99.502 |
| 64.5 | 30 | 12 | 378 | 112 | 64.5 | 112 | 111.44 |
| 64.6 | 34 | 20 | 426 | 130 | 64.6 | 130 | 129.35 |
| 64.6 | 40 | 10 | 404 | 128 | 64.6 | 128 | 127.36 |
| 64.6 | 36 | 14 | 394 | 138 | 64.6 | 138 | 137.31 |
| 64.6 | 42 | 20 | 404 | 136 | 64.6 | 136 | 135.32 |
| 64.6 | 28 | 18 | 380 | 120 | 64.6 | 120 | 119.4  |
| 64.7 | 34 | 16 | 380 | 116 | 64.7 | 116 | 115.42 |
| 64.7 | 34 | 14 | 368 | 114 | 64.7 | 114 | 113.43 |
| 64.7 | 32 | 20 | 400 | 118 | 64.7 | 118 | 117.41 |
| 64.7 | 30 | 26 | 398 | 118 | 64.7 | 118 | 117.41 |
| 64.7 | 26 | 14 | 386 | 130 | 64.7 | 130 | 129.35 |
| 64.8 | 24 | 14 | 416 | 106 | 64.8 | 106 | 105.47 |
| 64.8 | 32 | 14 | 366 | 110 | 64.8 | 110 | 109.45 |
| 64.8 | 38 | 22 | 392 | 114 | 64.8 | 114 | 113.43 |
| 64.8 | 38 | 14 | 384 | 126 | 64.8 | 126 | 125.37 |
| 64.8 | 40 | 18 | 352 | 112 | 64.8 | 112 | 111.44 |
| 64.9 | 38 | 32 | 360 | 116 | 64.9 | 116 | 115.42 |
| 64.9 | 36 | 24 | 396 | 142 | 64.9 | 142 | 141.29 |
| 64.9 | 24 | 24 | 444 | 118 | 64.9 | 118 | 117.41 |
| 64.9 | 34 | 20 | 392 | 124 | 64.9 | 124 | 123.38 |
| 64.9 | 38 | 36 | 388 | 140 | 64.9 | 140 | 139.3  |
| 65   | 34 | 36 | 390 | 132 | 65   | 132 | 131.34 |
| 65   | 28 | 36 | 402 | 114 | 65   | 114 | 113.43 |
| 65   | 30 | 34 | 408 | 116 | 65   | 116 | 115.42 |
| 65   | 34 | 38 | 392 | 118 | 65   | 118 | 117.41 |
| 65   | 32 | 40 | 390 | 126 | 65   | 126 | 125.37 |
| 65.1 | 30 | 58 | 402 | 130 | 65.1 | 130 | 129.35 |
| 65.1 | 40 | 72 | 390 | 132 | 65.1 | 132 | 131.34 |
| 65.1 | 28 | 74 | 410 | 142 | 65.1 | 142 | 141.29 |
| 65.1 | 32 | 72 | 396 | 118 | 65.1 | 118 | 117.41 |
| 65.1 | 32 | 68 | 396 | 134 | 65.1 | 134 | 133.33 |
| 65.2 | 34 | 58 | 410 | 122 | 65.2 | 122 | 121.39 |
| 65.2 | 40 | 84 | 424 | 138 | 65.2 | 138 | 137.31 |
| 65.2 | 36 | 58 | 402 | 146 | 65.2 | 146 | 145.27 |
| 65.2 | 42 | 60 | 390 | 140 | 65.2 | 140 | 139.3  |
| 65.2 | 30 | 74 | 408 | 122 | 65.2 | 122 | 121.39 |
| 65.3 | 30 | 50 | 428 | 150 | 65.3 | 150 | 149.25 |
| 65.3 | 32 | 62 | 398 | 132 | 65.3 | 132 | 131.34 |
| 65.3 | 32 | 58 | 422 | 128 | 65.3 | 128 | 127.36 |
| 65.3 | 34 | 48 | 426 | 124 | 65.3 | 124 | 123.38 |
| 65.3 | 36 | 44 | 444 | 128 | 65.3 | 128 | 127.36 |
| 65.4 | 28 | 44 | 446 | 152 | 65.4 | 152 | 151.24 |
| 65.4 | 36 | 40 | 428 | 134 | 65.4 | 134 | 133.33 |

|      |     |    |      |     |      |     |        |
|------|-----|----|------|-----|------|-----|--------|
| 65.4 | 38  | 50 | 424  | 126 | 65.4 | 126 | 125.37 |
| 65.4 | 36  | 32 | 498  | 152 | 65.4 | 152 | 151.24 |
| 65.4 | 38  | 28 | 486  | 168 | 65.4 | 168 | 167.16 |
| 65.5 | 26  | 28 | 492  | 154 | 65.5 | 154 | 153.23 |
| 65.5 | 34  | 34 | 498  | 140 | 65.5 | 140 | 139.3  |
| 65.5 | 28  | 26 | 478  | 164 | 65.5 | 164 | 163.18 |
| 65.5 | 22  | 24 | 528  | 148 | 65.5 | 148 | 147.26 |
| 65.5 | 32  | 30 | 516  | 166 | 65.5 | 166 | 165.17 |
| 65.6 | 40  | 24 | 568  | 178 | 65.6 | 178 | 177.11 |
| 65.6 | 40  | 18 | 578  | 166 | 65.6 | 166 | 165.17 |
| 65.6 | 28  | 20 | 566  | 162 | 65.6 | 162 | 161.19 |
| 65.6 | 34  | 16 | 570  | 156 | 65.6 | 156 | 155.22 |
| 65.6 | 30  | 18 | 606  | 186 | 65.6 | 186 | 185.07 |
| 65.7 | 38  | 16 | 604  | 170 | 65.7 | 170 | 169.15 |
| 65.7 | 32  | 24 | 658  | 166 | 65.7 | 166 | 165.17 |
| 65.7 | 26  | 26 | 612  | 160 | 65.7 | 160 | 159.2  |
| 65.7 | 40  | 12 | 636  | 164 | 65.7 | 164 | 163.18 |
| 65.7 | 46  | 16 | 726  | 170 | 65.7 | 170 | 169.15 |
| 65.8 | 28  | 16 | 736  | 166 | 65.8 | 166 | 165.17 |
| 65.8 | 30  | 22 | 774  | 176 | 65.8 | 176 | 175.12 |
| 65.8 | 50  | 8  | 808  | 168 | 65.8 | 168 | 167.16 |
| 65.8 | 26  | 18 | 838  | 170 | 65.8 | 170 | 169.15 |
| 65.8 | 36  | 18 | 830  | 200 | 65.8 | 200 | 199    |
| 65.9 | 32  | 12 | 870  | 182 | 65.9 | 182 | 181.09 |
| 65.9 | 52  | 26 | 926  | 188 | 65.9 | 188 | 187.06 |
| 65.9 | 44  | 14 | 874  | 176 | 65.9 | 176 | 175.12 |
| 65.9 | 38  | 24 | 894  | 172 | 65.9 | 172 | 171.14 |
| 65.9 | 46  | 20 | 858  | 184 | 65.9 | 184 | 183.08 |
| 66   | 40  | 18 | 816  | 178 | 66   | 178 | 177.11 |
| 66   | 38  | 16 | 830  | 206 | 66   | 206 | 204.98 |
| 66   | 56  | 12 | 818  | 178 | 66   | 178 | 177.11 |
| 66   | 52  | 20 | 804  | 172 | 66   | 172 | 171.14 |
| 66   | 46  | 16 | 782  | 210 | 66   | 210 | 208.96 |
| 66.1 | 58  | 12 | 868  | 178 | 66.1 | 178 | 177.11 |
| 66.1 | 62  | 28 | 822  | 190 | 66.1 | 190 | 189.05 |
| 66.1 | 52  | 24 | 806  | 192 | 66.1 | 192 | 191.04 |
| 66.1 | 62  | 14 | 800  | 186 | 66.1 | 186 | 185.07 |
| 66.1 | 62  | 22 | 802  | 186 | 66.1 | 186 | 185.07 |
| 66.2 | 60  | 14 | 810  | 204 | 66.2 | 204 | 202.99 |
| 66.2 | 78  | 16 | 806  | 210 | 66.2 | 210 | 208.96 |
| 66.2 | 86  | 16 | 866  | 234 | 66.2 | 234 | 232.84 |
| 66.2 | 72  | 18 | 880  | 202 | 66.2 | 202 | 201    |
| 66.2 | 98  | 18 | 884  | 214 | 66.2 | 214 | 212.94 |
| 66.3 | 86  | 22 | 896  | 222 | 66.3 | 222 | 220.9  |
| 66.3 | 110 | 12 | 972  | 240 | 66.3 | 240 | 238.81 |
| 66.3 | 136 | 20 | 1022 | 248 | 66.3 | 248 | 246.77 |
| 66.3 | 122 | 12 | 1052 | 254 | 66.3 | 254 | 252.74 |

|      |     |    |      |     |      |     |        |
|------|-----|----|------|-----|------|-----|--------|
| 66.3 | 156 | 14 | 1026 | 252 | 66.3 | 252 | 250.75 |
| 66.4 | 174 | 26 | 1036 | 286 | 66.4 | 286 | 284.58 |
| 66.4 | 216 | 18 | 1028 | 274 | 66.4 | 274 | 272.64 |
| 66.4 | 242 | 24 | 996  | 302 | 66.4 | 302 | 300.5  |
| 66.4 | 276 | 18 | 956  | 284 | 66.4 | 284 | 282.59 |
| 66.4 | 290 | 14 | 882  | 262 | 66.4 | 262 | 260.7  |
| 66.5 | 330 | 18 | 860  | 272 | 66.5 | 272 | 270.65 |
| 66.5 | 300 | 26 | 870  | 274 | 66.5 | 274 | 272.64 |
| 66.5 | 320 | 18 | 856  | 242 | 66.5 | 242 | 240.8  |
| 66.5 | 286 | 20 | 856  | 226 | 66.5 | 226 | 224.88 |
| 66.5 | 328 | 16 | 860  | 254 | 66.5 | 254 | 252.74 |
| 66.6 | 284 | 26 | 816  | 240 | 66.6 | 240 | 238.81 |
| 66.6 | 306 | 24 | 786  | 240 | 66.6 | 240 | 238.81 |
| 66.6 | 292 | 20 | 678  | 226 | 66.6 | 226 | 224.88 |
| 66.6 | 252 | 18 | 664  | 208 | 66.6 | 208 | 206.97 |
| 66.6 | 256 | 18 | 660  | 216 | 66.6 | 216 | 214.93 |
| 66.7 | 252 | 32 | 582  | 214 | 66.7 | 214 | 212.94 |
| 66.7 | 230 | 16 | 580  | 198 | 66.7 | 198 | 197.01 |
| 66.7 | 200 | 22 | 528  | 190 | 66.7 | 190 | 189.05 |
| 66.7 | 202 | 28 | 520  | 190 | 66.7 | 190 | 189.05 |
| 66.7 | 176 | 30 | 520  | 172 | 66.7 | 172 | 171.14 |
| 66.8 | 152 | 36 | 488  | 200 | 66.8 | 200 | 199    |
| 66.8 | 122 | 22 | 498  | 144 | 66.8 | 144 | 143.28 |
| 66.8 | 150 | 32 | 462  | 172 | 66.8 | 172 | 171.14 |
| 66.8 | 92  | 38 | 450  | 160 | 66.8 | 160 | 159.2  |
| 66.8 | 100 | 20 | 440  | 130 | 66.8 | 130 | 129.35 |
| 66.9 | 92  | 20 | 422  | 144 | 66.9 | 144 | 143.28 |
| 66.9 | 62  | 18 | 454  | 160 | 66.9 | 160 | 159.2  |
| 66.9 | 78  | 22 | 452  | 146 | 66.9 | 146 | 145.27 |
| 66.9 | 90  | 14 | 444  | 154 | 66.9 | 154 | 153.23 |
| 66.9 | 62  | 24 | 438  | 146 | 66.9 | 146 | 145.27 |
| 67   | 56  | 20 | 430  | 144 | 67   | 144 | 143.28 |
| 67   | 68  | 18 | 404  | 160 | 67   | 160 | 159.2  |
| 67   | 66  | 24 | 388  | 168 | 67   | 168 | 167.16 |
| 67   | 48  | 24 | 424  | 168 | 67   | 168 | 167.16 |
| 67   | 54  | 18 | 428  | 154 | 67   | 154 | 153.23 |
| 67.1 | 64  | 22 | 394  | 180 | 67.1 | 180 | 179.1  |
| 67.1 | 56  | 26 | 406  | 170 | 67.1 | 170 | 169.15 |
| 67.1 | 54  | 18 | 420  | 170 | 67.1 | 170 | 169.15 |
| 67.1 | 48  | 18 | 406  | 136 | 67.1 | 136 | 135.32 |
| 67.1 | 82  | 16 | 416  | 166 | 67.1 | 166 | 165.17 |
| 67.2 | 56  | 28 | 418  | 154 | 67.2 | 154 | 153.23 |
| 67.2 | 60  | 12 | 408  | 148 | 67.2 | 148 | 147.26 |
| 67.2 | 58  | 20 | 396  | 144 | 67.2 | 144 | 143.28 |
| 67.2 | 52  | 20 | 438  | 168 | 67.2 | 168 | 167.16 |
| 67.2 | 62  | 18 | 398  | 150 | 67.2 | 150 | 149.25 |
| 67.3 | 46  | 20 | 420  | 170 | 67.3 | 170 | 169.15 |

|      |      |    |      |     |      |     |        |
|------|------|----|------|-----|------|-----|--------|
| 67.3 | 60   | 26 | 430  | 162 | 67.3 | 162 | 161.19 |
| 67.3 | 64   | 26 | 424  | 188 | 67.3 | 188 | 187.06 |
| 67.3 | 60   | 22 | 412  | 166 | 67.3 | 166 | 165.17 |
| 67.3 | 62   | 24 | 424  | 170 | 67.3 | 170 | 169.15 |
| 67.4 | 66   | 14 | 412  | 196 | 67.4 | 196 | 195.02 |
| 67.4 | 78   | 24 | 440  | 188 | 67.4 | 188 | 187.06 |
| 67.4 | 80   | 24 | 400  | 202 | 67.4 | 202 | 201    |
| 67.4 | 72   | 24 | 426  | 196 | 67.4 | 196 | 195.02 |
| 67.4 | 70   | 22 | 448  | 198 | 67.4 | 198 | 197.01 |
| 67.5 | 84   | 30 | 494  | 190 | 67.5 | 190 | 189.05 |
| 67.5 | 88   | 28 | 440  | 196 | 67.5 | 196 | 195.02 |
| 67.5 | 98   | 24 | 478  | 168 | 67.5 | 168 | 167.16 |
| 67.5 | 104  | 18 | 454  | 190 | 67.5 | 190 | 189.05 |
| 67.5 | 96   | 24 | 450  | 190 | 67.5 | 190 | 189.05 |
| 67.6 | 86   | 18 | 468  | 210 | 67.6 | 210 | 208.96 |
| 67.6 | 104  | 18 | 450  | 202 | 67.6 | 202 | 201    |
| 67.6 | 128  | 10 | 448  | 214 | 67.6 | 214 | 212.94 |
| 67.6 | 124  | 18 | 482  | 226 | 67.6 | 226 | 224.88 |
| 67.6 | 136  | 28 | 454  | 218 | 67.6 | 218 | 216.92 |
| 67.7 | 178  | 20 | 498  | 276 | 67.7 | 276 | 274.63 |
| 67.7 | 168  | 20 | 550  | 252 | 67.7 | 252 | 250.75 |
| 67.7 | 206  | 22 | 510  | 278 | 67.7 | 278 | 276.62 |
| 67.7 | 250  | 22 | 506  | 274 | 67.7 | 274 | 272.64 |
| 67.7 | 268  | 10 | 568  | 322 | 67.7 | 322 | 320.4  |
| 67.8 | 238  | 16 | 524  | 312 | 67.8 | 312 | 310.45 |
| 67.8 | 282  | 28 | 598  | 362 | 67.8 | 362 | 360.2  |
| 67.8 | 324  | 18 | 604  | 376 | 67.8 | 376 | 374.13 |
| 67.8 | 350  | 20 | 634  | 440 | 67.8 | 440 | 437.81 |
| 67.8 | 378  | 22 | 620  | 472 | 67.8 | 472 | 469.65 |
| 67.9 | 454  | 24 | 716  | 478 | 67.9 | 478 | 475.62 |
| 67.9 | 516  | 22 | 744  | 510 | 67.9 | 510 | 507.46 |
| 67.9 | 666  | 22 | 774  | 558 | 67.9 | 558 | 555.22 |
| 67.9 | 774  | 14 | 762  | 592 | 67.9 | 592 | 589.05 |
| 67.9 | 846  | 22 | 808  | 624 | 67.9 | 624 | 620.9  |
| 68   | 1040 | 16 | 880  | 682 | 68   | 682 | 678.61 |
| 68   | 1174 | 32 | 898  | 680 | 68   | 680 | 676.62 |
| 68   | 1366 | 24 | 954  | 676 | 68   | 676 | 672.64 |
| 68   | 1388 | 28 | 914  | 684 | 68   | 684 | 680.6  |
| 68   | 1574 | 12 | 940  | 650 | 68   | 650 | 646.77 |
| 68.1 | 1676 | 32 | 1034 | 692 | 68.1 | 692 | 688.56 |
| 68.1 | 1592 | 32 | 1080 | 606 | 68.1 | 606 | 602.99 |
| 68.1 | 1540 | 32 | 1130 | 616 | 68.1 | 616 | 612.94 |
| 68.1 | 1538 | 38 | 1000 | 606 | 68.1 | 606 | 602.99 |
| 68.1 | 1378 | 24 | 1054 | 612 | 68.1 | 612 | 608.96 |
| 68.2 | 1310 | 34 | 1118 | 544 | 68.2 | 544 | 541.29 |
| 68.2 | 1294 | 32 | 1102 | 542 | 68.2 | 542 | 539.3  |
| 68.2 | 1158 | 44 | 1070 | 494 | 68.2 | 494 | 491.54 |

|      |      |    |      |     |      |     |        |
|------|------|----|------|-----|------|-----|--------|
| 68.2 | 1168 | 28 | 958  | 492 | 68.2 | 492 | 489.55 |
| 68.2 | 1150 | 28 | 1034 | 478 | 68.2 | 478 | 475.62 |
| 68.3 | 1078 | 32 | 934  | 462 | 68.3 | 462 | 459.7  |
| 68.3 | 972  | 30 | 932  | 456 | 68.3 | 456 | 453.73 |
| 68.3 | 948  | 40 | 912  | 416 | 68.3 | 416 | 413.93 |
| 68.3 | 794  | 34 | 864  | 342 | 68.3 | 342 | 340.3  |
| 68.3 | 660  | 34 | 768  | 360 | 68.3 | 360 | 358.21 |
| 68.4 | 594  | 28 | 730  | 296 | 68.4 | 296 | 294.53 |
| 68.4 | 490  | 28 | 786  | 278 | 68.4 | 278 | 276.62 |
| 68.4 | 416  | 30 | 684  | 260 | 68.4 | 260 | 258.71 |
| 68.4 | 368  | 32 | 710  | 276 | 68.4 | 276 | 274.63 |
| 68.4 | 324  | 26 | 646  | 266 | 68.4 | 266 | 264.68 |
| 68.5 | 288  | 34 | 616  | 230 | 68.5 | 230 | 228.86 |
| 68.5 | 268  | 34 | 542  | 232 | 68.5 | 232 | 230.85 |
| 68.5 | 244  | 22 | 560  | 214 | 68.5 | 214 | 212.94 |
| 68.5 | 244  | 36 | 550  | 240 | 68.5 | 240 | 238.81 |
| 68.5 | 180  | 28 | 488  | 210 | 68.5 | 210 | 208.96 |
| 68.6 | 182  | 26 | 504  | 182 | 68.6 | 182 | 181.09 |
| 68.6 | 164  | 30 | 500  | 196 | 68.6 | 196 | 195.02 |
| 68.6 | 162  | 36 | 480  | 202 | 68.6 | 202 | 201    |
| 68.6 | 140  | 32 | 446  | 216 | 68.6 | 216 | 214.93 |
| 68.6 | 138  | 32 | 430  | 190 | 68.6 | 190 | 189.05 |
| 68.7 | 136  | 34 | 448  | 212 | 68.7 | 212 | 210.95 |
| 68.7 | 128  | 34 | 432  | 186 | 68.7 | 186 | 185.07 |
| 68.7 | 138  | 40 | 436  | 176 | 68.7 | 176 | 175.12 |
| 68.7 | 124  | 30 | 414  | 186 | 68.7 | 186 | 185.07 |
| 68.7 | 110  | 36 | 392  | 200 | 68.7 | 200 | 199    |
| 68.8 | 124  | 34 | 398  | 204 | 68.8 | 204 | 202.99 |
| 68.8 | 118  | 50 | 430  | 196 | 68.8 | 196 | 195.02 |
| 68.8 | 128  | 48 | 402  | 206 | 68.8 | 206 | 204.98 |
| 68.8 | 134  | 30 | 404  | 188 | 68.8 | 188 | 187.06 |
| 68.8 | 136  | 56 | 386  | 204 | 68.8 | 204 | 202.99 |
| 68.9 | 132  | 38 | 398  | 208 | 68.9 | 208 | 206.97 |
| 68.9 | 140  | 58 | 424  | 228 | 68.9 | 228 | 226.87 |
| 68.9 | 174  | 40 | 392  | 220 | 68.9 | 220 | 218.91 |
| 68.9 | 180  | 48 | 412  | 194 | 68.9 | 194 | 193.03 |
| 68.9 | 180  | 50 | 406  | 256 | 68.9 | 256 | 254.73 |
| 69   | 218  | 36 | 424  | 270 | 69   | 270 | 268.66 |
| 69   | 254  | 44 | 414  | 300 | 69   | 300 | 298.51 |
| 69   | 280  | 56 | 386  | 298 | 69   | 298 | 296.52 |
| 69   | 302  | 58 | 424  | 284 | 69   | 284 | 282.59 |
| 69   | 342  | 44 | 374  | 350 | 69   | 350 | 348.26 |
| 69.1 | 392  | 44 | 356  | 344 | 69.1 | 344 | 342.29 |
| 69.1 | 466  | 64 | 410  | 354 | 69.1 | 354 | 352.24 |
| 69.1 | 574  | 54 | 366  | 378 | 69.1 | 378 | 376.12 |
| 69.1 | 608  | 60 | 386  | 362 | 69.1 | 362 | 360.2  |
| 69.1 | 658  | 50 | 376  | 392 | 69.1 | 392 | 390.05 |

|      |     |     |     |     |      |     |        |
|------|-----|-----|-----|-----|------|-----|--------|
| 69.2 | 718 | 62  | 406 | 334 | 69.2 | 334 | 332.34 |
| 69.2 | 822 | 56  | 370 | 376 | 69.2 | 376 | 374.13 |
| 69.2 | 844 | 68  | 402 | 348 | 69.2 | 348 | 346.27 |
| 69.2 | 804 | 76  | 458 | 354 | 69.2 | 354 | 352.24 |
| 69.2 | 784 | 86  | 392 | 314 | 69.2 | 314 | 312.44 |
| 69.3 | 722 | 82  | 394 | 318 | 69.3 | 318 | 316.42 |
| 69.3 | 718 | 70  | 390 | 336 | 69.3 | 336 | 334.33 |
| 69.3 | 704 | 76  | 378 | 316 | 69.3 | 316 | 314.43 |
| 69.3 | 612 | 96  | 372 | 308 | 69.3 | 308 | 306.47 |
| 69.3 | 630 | 90  | 376 | 272 | 69.3 | 272 | 270.65 |
| 69.4 | 604 | 94  | 378 | 286 | 69.4 | 286 | 284.58 |
| 69.4 | 572 | 90  | 388 | 252 | 69.4 | 252 | 250.75 |
| 69.4 | 526 | 80  | 412 | 236 | 69.4 | 236 | 234.83 |
| 69.4 | 486 | 106 | 386 | 232 | 69.4 | 232 | 230.85 |
| 69.4 | 450 | 88  | 374 | 228 | 69.4 | 228 | 226.87 |
| 69.5 | 462 | 104 | 366 | 202 | 69.5 | 202 | 201    |
| 69.5 | 372 | 74  | 382 | 206 | 69.5 | 206 | 204.98 |
| 69.5 | 318 | 102 | 404 | 194 | 69.5 | 194 | 193.03 |
| 69.5 | 294 | 90  | 404 | 152 | 69.5 | 152 | 151.24 |
| 69.5 | 210 | 82  | 410 | 152 | 69.5 | 152 | 151.24 |
| 69.6 | 198 | 88  | 384 | 144 | 69.6 | 144 | 143.28 |
| 69.6 | 194 | 68  | 372 | 128 | 69.6 | 128 | 127.36 |
| 69.6 | 156 | 88  | 388 | 148 | 69.6 | 148 | 147.26 |
| 69.6 | 148 | 80  | 400 | 138 | 69.6 | 138 | 137.31 |
| 69.6 | 144 | 82  | 362 | 138 | 69.6 | 138 | 137.31 |
| 69.7 | 106 | 76  | 386 | 154 | 69.7 | 154 | 153.23 |
| 69.7 | 100 | 60  | 386 | 128 | 69.7 | 128 | 127.36 |
| 69.7 | 98  | 78  | 410 | 150 | 69.7 | 150 | 149.25 |
| 69.7 | 86  | 58  | 378 | 136 | 69.7 | 136 | 135.32 |
| 69.7 | 82  | 52  | 360 | 146 | 69.7 | 146 | 145.27 |
| 69.8 | 82  | 60  | 372 | 122 | 69.8 | 122 | 121.39 |
| 69.8 | 64  | 62  | 400 | 128 | 69.8 | 128 | 127.36 |
| 69.8 | 68  | 46  | 378 | 110 | 69.8 | 110 | 109.45 |
| 69.8 | 60  | 60  | 380 | 140 | 69.8 | 140 | 139.3  |
| 69.8 | 56  | 48  | 362 | 124 | 69.8 | 124 | 123.38 |
| 69.9 | 46  | 50  | 356 | 116 | 69.9 | 116 | 115.42 |
| 69.9 | 40  | 52  | 396 | 104 | 69.9 | 104 | 103.48 |
| 69.9 | 58  | 38  | 376 | 106 | 69.9 | 106 | 105.47 |
| 69.9 | 64  | 38  | 394 | 102 | 69.9 | 102 | 101.49 |
| 69.9 | 52  | 24  | 386 | 120 | 69.9 | 120 | 119.4  |
| 70   | 62  | 32  | 400 | 104 | 70   | 104 | 103.48 |
| 70   | 50  | 28  | 358 | 94  | 70   | 94  | 93.532 |
| 70   | 40  | 36  | 408 | 110 | 70   | 110 | 109.45 |
| 70   | 50  | 32  | 392 | 98  | 70   | 98  | 97.512 |
| 70   | 50  | 16  | 356 | 120 | 70   | 120 | 119.4  |
| 70.1 | 46  | 24  | 356 | 118 | 70.1 | 118 | 117.41 |
| 70.1 | 42  | 26  | 382 | 114 | 70.1 | 114 | 113.43 |

|      |    |    |     |     |      |     |        |
|------|----|----|-----|-----|------|-----|--------|
| 70.1 | 36 | 18 | 384 | 120 | 70.1 | 120 | 119.4  |
| 70.1 | 40 | 22 | 388 | 122 | 70.1 | 122 | 121.39 |
| 70.1 | 50 | 14 | 412 | 108 | 70.1 | 108 | 107.46 |
| 70.2 | 32 | 24 | 372 | 144 | 70.2 | 144 | 143.28 |
| 70.2 | 46 | 22 | 370 | 136 | 70.2 | 136 | 135.32 |
| 70.2 | 44 | 22 | 374 | 114 | 70.2 | 114 | 113.43 |
| 70.2 | 38 | 22 | 396 | 128 | 70.2 | 128 | 127.36 |
| 70.2 | 38 | 18 | 360 | 112 | 70.2 | 112 | 111.44 |
| 70.3 | 34 | 32 | 410 | 118 | 70.3 | 118 | 117.41 |
| 70.3 | 40 | 20 | 370 | 120 | 70.3 | 120 | 119.4  |
| 70.3 | 36 | 14 | 386 | 128 | 70.3 | 128 | 127.36 |
| 70.3 | 36 | 28 | 386 | 124 | 70.3 | 124 | 123.38 |
| 70.3 | 40 | 24 | 380 | 128 | 70.3 | 128 | 127.36 |
| 70.4 | 30 | 16 | 342 | 132 | 70.4 | 132 | 131.34 |
| 70.4 | 36 | 16 | 364 | 132 | 70.4 | 132 | 131.34 |
| 70.4 | 32 | 18 | 346 | 98  | 70.4 | 98  | 97.512 |
| 70.4 | 22 | 24 | 412 | 120 | 70.4 | 120 | 119.4  |
| 70.4 | 32 | 16 | 384 | 148 | 70.4 | 148 | 147.26 |
| 70.5 | 32 | 18 | 404 | 122 | 70.5 | 122 | 121.39 |
| 70.5 | 20 | 20 | 376 | 128 | 70.5 | 128 | 127.36 |
| 70.5 | 40 | 20 | 378 | 118 | 70.5 | 118 | 117.41 |
| 70.5 | 26 | 22 | 374 | 126 | 70.5 | 126 | 125.37 |
| 70.5 | 34 | 22 | 374 | 90  | 70.5 | 90  | 89.552 |
| 70.6 | 32 | 26 | 378 | 116 | 70.6 | 116 | 115.42 |
| 70.6 | 32 | 30 | 370 | 116 | 70.6 | 116 | 115.42 |
| 70.6 | 28 | 8  | 354 | 98  | 70.6 | 98  | 97.512 |
| 70.6 | 32 | 14 | 356 | 100 | 70.6 | 100 | 99.502 |
| 70.6 | 28 | 20 | 422 | 96  | 70.6 | 96  | 95.522 |
| 70.7 | 34 | 18 | 386 | 106 | 70.7 | 106 | 105.47 |
| 70.7 | 22 | 18 | 354 | 100 | 70.7 | 100 | 99.502 |
| 70.7 | 34 | 14 | 358 | 124 | 70.7 | 124 | 123.38 |
| 70.7 | 32 | 18 | 390 | 102 | 70.7 | 102 | 101.49 |
| 70.7 | 30 | 22 | 380 | 100 | 70.7 | 100 | 99.502 |
| 70.8 | 38 | 18 | 400 | 110 | 70.8 | 110 | 109.45 |
| 70.8 | 28 | 18 | 386 | 108 | 70.8 | 108 | 107.46 |
| 70.8 | 30 | 14 | 376 | 108 | 70.8 | 108 | 107.46 |
| 70.8 | 28 | 18 | 386 | 86  | 70.8 | 86  | 85.572 |
| 70.8 | 24 | 14 | 360 | 108 | 70.8 | 108 | 107.46 |
| 70.9 | 36 | 14 | 380 | 106 | 70.9 | 106 | 105.47 |
| 70.9 | 24 | 14 | 404 | 106 | 70.9 | 106 | 105.47 |
| 70.9 | 18 | 14 | 362 | 92  | 70.9 | 92  | 91.542 |
| 70.9 | 40 | 18 | 390 | 108 | 70.9 | 108 | 107.46 |
| 70.9 | 26 | 16 | 344 | 104 | 70.9 | 104 | 103.48 |
| 71   | 20 | 12 | 398 | 96  | 71   | 96  | 95.522 |
| 71   | 30 | 12 | 408 | 110 | 71   | 110 | 109.45 |
| 71   | 26 | 12 | 386 | 110 | 71   | 110 | 109.45 |
| 71   | 16 | 12 | 372 | 98  | 71   | 98  | 97.512 |

|      |    |    |     |     |      |     |        |
|------|----|----|-----|-----|------|-----|--------|
| 71   | 30 | 14 | 396 | 98  | 71   | 98  | 97.512 |
| 71.1 | 28 | 12 | 398 | 92  | 71.1 | 92  | 91.542 |
| 71.1 | 24 | 12 | 350 | 112 | 71.1 | 112 | 111.44 |
| 71.1 | 22 | 8  | 346 | 102 | 71.1 | 102 | 101.49 |
| 71.1 | 32 | 12 | 362 | 104 | 71.1 | 104 | 103.48 |
| 71.1 | 26 | 14 | 390 | 86  | 71.1 | 86  | 85.572 |
| 71.2 | 22 | 14 | 384 | 86  | 71.2 | 86  | 85.572 |
| 71.2 | 20 | 30 | 348 | 78  | 71.2 | 78  | 77.612 |
| 71.2 | 18 | 18 | 382 | 102 | 71.2 | 102 | 101.49 |
| 71.2 | 28 | 18 | 398 | 108 | 71.2 | 108 | 107.46 |
| 71.2 | 16 | 12 | 366 | 98  | 71.2 | 98  | 97.512 |
| 71.3 | 28 | 10 | 388 | 96  | 71.3 | 96  | 95.522 |
| 71.3 | 22 | 12 | 360 | 92  | 71.3 | 92  | 91.542 |
| 71.3 | 28 | 10 | 404 | 110 | 71.3 | 110 | 109.45 |
| 71.3 | 26 | 18 | 380 | 92  | 71.3 | 92  | 91.542 |
| 71.3 | 32 | 10 | 394 | 94  | 71.3 | 94  | 93.532 |
| 71.4 | 16 | 22 | 396 | 106 | 71.4 | 106 | 105.47 |
| 71.4 | 30 | 8  | 392 | 86  | 71.4 | 86  | 85.572 |
| 71.4 | 22 | 18 | 392 | 90  | 71.4 | 90  | 89.552 |
| 71.4 | 30 | 10 | 368 | 122 | 71.4 | 122 | 121.39 |
| 71.4 | 24 | 12 | 364 | 92  | 71.4 | 92  | 91.542 |
| 71.5 | 24 | 12 | 412 | 94  | 71.5 | 94  | 93.532 |
| 71.5 | 28 | 12 | 372 | 104 | 71.5 | 104 | 103.48 |
| 71.5 | 18 | 12 | 410 | 114 | 71.5 | 114 | 113.43 |
| 71.5 | 24 | 10 | 396 | 102 | 71.5 | 102 | 101.49 |
| 71.5 | 24 | 10 | 352 | 102 | 71.5 | 102 | 101.49 |
| 71.6 | 28 | 12 | 370 | 104 | 71.6 | 104 | 103.48 |
| 71.6 | 20 | 14 | 424 | 106 | 71.6 | 106 | 105.47 |
| 71.6 | 24 | 12 | 404 | 106 | 71.6 | 106 | 105.47 |
| 71.6 | 22 | 10 | 398 | 124 | 71.6 | 124 | 123.38 |
| 71.6 | 24 | 12 | 392 | 108 | 71.6 | 108 | 107.46 |
| 71.7 | 24 | 12 | 370 | 96  | 71.7 | 96  | 95.522 |
| 71.7 | 24 | 6  | 382 | 116 | 71.7 | 116 | 115.42 |
| 71.7 | 36 | 16 | 374 | 96  | 71.7 | 96  | 95.522 |
| 71.7 | 36 | 16 | 384 | 120 | 71.7 | 120 | 119.4  |
| 71.7 | 18 | 16 | 436 | 112 | 71.7 | 112 | 111.44 |
| 71.8 | 36 | 12 | 370 | 114 | 71.8 | 114 | 113.43 |
| 71.8 | 22 | 12 | 406 | 120 | 71.8 | 120 | 119.4  |
| 71.8 | 30 | 8  | 400 | 94  | 71.8 | 94  | 93.532 |
| 71.8 | 26 | 12 | 394 | 92  | 71.8 | 92  | 91.542 |
| 71.8 | 28 | 6  | 372 | 130 | 71.8 | 130 | 129.35 |
| 71.9 | 24 | 16 | 378 | 98  | 71.9 | 98  | 97.512 |
| 71.9 | 22 | 12 | 358 | 92  | 71.9 | 92  | 91.542 |
| 71.9 | 22 | 14 | 372 | 88  | 71.9 | 88  | 87.562 |
| 71.9 | 28 | 14 | 406 | 116 | 71.9 | 116 | 115.42 |
| 71.9 | 24 | 20 | 402 | 110 | 71.9 | 110 | 109.45 |
| 72   | 26 | 10 | 386 | 88  | 72   | 88  | 87.562 |

|      |     |    |     |     |      |     |        |
|------|-----|----|-----|-----|------|-----|--------|
| 72   | 26  | 10 | 410 | 100 | 72   | 100 | 99.502 |
| 72   | 24  | 14 | 392 | 98  | 72   | 98  | 97.512 |
| 72   | 22  | 10 | 408 | 126 | 72   | 126 | 125.37 |
| 72   | 18  | 10 | 376 | 98  | 72   | 98  | 97.512 |
| 72.1 | 34  | 12 | 400 | 106 | 72.1 | 106 | 105.47 |
| 72.1 | 24  | 10 | 392 | 102 | 72.1 | 102 | 101.49 |
| 72.1 | 28  | 18 | 416 | 98  | 72.1 | 98  | 97.512 |
| 72.1 | 26  | 16 | 402 | 98  | 72.1 | 98  | 97.512 |
| 72.1 | 26  | 18 | 362 | 112 | 72.1 | 112 | 111.44 |
| 72.2 | 20  | 12 | 412 | 100 | 72.2 | 100 | 99.502 |
| 72.2 | 22  | 18 | 438 | 104 | 72.2 | 104 | 103.48 |
| 72.2 | 22  | 18 | 426 | 104 | 72.2 | 104 | 103.48 |
| 72.2 | 28  | 16 | 464 | 110 | 72.2 | 110 | 109.45 |
| 72.2 | 20  | 12 | 414 | 106 | 72.2 | 106 | 105.47 |
| 72.3 | 34  | 20 | 480 | 136 | 72.3 | 136 | 135.32 |
| 72.3 | 28  | 24 | 446 | 112 | 72.3 | 112 | 111.44 |
| 72.3 | 42  | 20 | 456 | 132 | 72.3 | 132 | 131.34 |
| 72.3 | 34  | 20 | 516 | 114 | 72.3 | 114 | 113.43 |
| 72.3 | 28  | 18 | 496 | 154 | 72.3 | 154 | 153.23 |
| 72.4 | 34  | 18 | 504 | 122 | 72.4 | 122 | 121.39 |
| 72.4 | 30  | 24 | 540 | 134 | 72.4 | 134 | 133.33 |
| 72.4 | 36  | 22 | 542 | 122 | 72.4 | 122 | 121.39 |
| 72.4 | 44  | 18 | 598 | 112 | 72.4 | 112 | 111.44 |
| 72.4 | 56  | 24 | 584 | 126 | 72.4 | 126 | 125.37 |
| 72.5 | 34  | 20 | 634 | 146 | 72.5 | 146 | 145.27 |
| 72.5 | 42  | 34 | 642 | 144 | 72.5 | 144 | 143.28 |
| 72.5 | 54  | 36 | 668 | 146 | 72.5 | 146 | 145.27 |
| 72.5 | 74  | 24 | 602 | 130 | 72.5 | 130 | 129.35 |
| 72.5 | 68  | 20 | 626 | 140 | 72.5 | 140 | 139.3  |
| 72.6 | 80  | 40 | 580 | 174 | 72.6 | 174 | 173.13 |
| 72.6 | 100 | 48 | 556 | 158 | 72.6 | 158 | 157.21 |
| 72.6 | 120 | 34 | 570 | 158 | 72.6 | 158 | 157.21 |
| 72.6 | 124 | 46 | 558 | 158 | 72.6 | 158 | 157.21 |
| 72.6 | 154 | 46 | 552 | 132 | 72.6 | 132 | 131.34 |
| 72.7 | 158 | 54 | 558 | 176 | 72.7 | 176 | 175.12 |
| 72.7 | 200 | 36 | 566 | 134 | 72.7 | 134 | 133.33 |
| 72.7 | 156 | 46 | 550 | 152 | 72.7 | 152 | 151.24 |
| 72.7 | 152 | 42 | 540 | 166 | 72.7 | 166 | 165.17 |
| 72.7 | 120 | 46 | 542 | 146 | 72.7 | 146 | 145.27 |
| 72.8 | 128 | 46 | 550 | 140 | 72.8 | 140 | 139.3  |
| 72.8 | 120 | 48 | 522 | 156 | 72.8 | 156 | 155.22 |
| 72.8 | 100 | 34 | 450 | 118 | 72.8 | 118 | 117.41 |
| 72.8 | 102 | 42 | 458 | 128 | 72.8 | 128 | 127.36 |
| 72.8 | 98  | 38 | 416 | 132 | 72.8 | 132 | 131.34 |
| 72.9 | 106 | 48 | 474 | 136 | 72.9 | 136 | 135.32 |
| 72.9 | 114 | 54 | 416 | 126 | 72.9 | 126 | 125.37 |
| 72.9 | 112 | 44 | 422 | 134 | 72.9 | 134 | 133.33 |

|      |     |    |     |     |      |     |        |
|------|-----|----|-----|-----|------|-----|--------|
| 72.9 | 108 | 44 | 380 | 116 | 72.9 | 116 | 115.42 |
| 72.9 | 96  | 32 | 442 | 134 | 72.9 | 134 | 133.33 |
| 73   | 82  | 46 | 410 | 112 | 73   | 112 | 111.44 |
| 73   | 62  | 38 | 394 | 112 | 73   | 112 | 111.44 |
| 73   | 60  | 36 | 404 | 122 | 73   | 122 | 121.39 |
| 73   | 56  | 30 | 364 | 108 | 73   | 108 | 107.46 |
| 73   | 50  | 26 | 426 | 104 | 73   | 104 | 103.48 |
| 73.1 | 40  | 34 | 374 | 104 | 73.1 | 104 | 103.48 |
| 73.1 | 34  | 28 | 396 | 124 | 73.1 | 124 | 123.38 |
| 73.1 | 38  | 34 | 400 | 94  | 73.1 | 94  | 93.532 |
| 73.1 | 30  | 26 | 368 | 130 | 73.1 | 130 | 129.35 |
| 73.1 | 26  | 36 | 400 | 102 | 73.1 | 102 | 101.49 |
| 73.2 | 24  | 26 | 386 | 112 | 73.2 | 112 | 111.44 |
| 73.2 | 26  | 32 | 402 | 106 | 73.2 | 106 | 105.47 |
| 73.2 | 36  | 22 | 376 | 108 | 73.2 | 108 | 107.46 |
| 73.2 | 24  | 26 | 400 | 116 | 73.2 | 116 | 115.42 |
| 73.2 | 32  | 28 | 414 | 94  | 73.2 | 94  | 93.532 |
| 73.3 | 18  | 28 | 384 | 106 | 73.3 | 106 | 105.47 |
| 73.3 | 32  | 30 | 372 | 66  | 73.3 | 66  | 65.672 |
| 73.3 | 26  | 32 | 376 | 118 | 73.3 | 118 | 117.41 |
| 73.3 | 20  | 28 | 360 | 96  | 73.3 | 96  | 95.522 |
| 73.3 | 32  | 22 | 338 | 116 | 73.3 | 116 | 115.42 |
| 73.4 | 16  | 30 | 388 | 98  | 73.4 | 98  | 97.512 |
| 73.4 | 28  | 22 | 390 | 114 | 73.4 | 114 | 113.43 |
| 73.4 | 18  | 22 | 452 | 118 | 73.4 | 118 | 117.41 |
| 73.4 | 24  | 26 | 350 | 120 | 73.4 | 120 | 119.4  |
| 73.4 | 16  | 30 | 390 | 100 | 73.4 | 100 | 99.502 |
| 73.5 | 18  | 22 | 352 | 90  | 73.5 | 90  | 89.552 |
| 73.5 | 18  | 24 | 356 | 120 | 73.5 | 120 | 119.4  |
| 73.5 | 24  | 16 | 378 | 118 | 73.5 | 118 | 117.41 |
| 73.5 | 22  | 10 | 382 | 92  | 73.5 | 92  | 91.542 |
| 73.5 | 20  | 18 | 370 | 98  | 73.5 | 98  | 97.512 |
| 73.6 | 28  | 16 | 374 | 112 | 73.6 | 112 | 111.44 |
| 73.6 | 20  | 28 | 378 | 110 | 73.6 | 110 | 109.45 |
| 73.6 | 14  | 18 | 392 | 104 | 73.6 | 104 | 103.48 |
| 73.6 | 26  | 14 | 366 | 98  | 73.6 | 98  | 97.512 |
| 73.6 | 22  | 22 | 352 | 106 | 73.6 | 106 | 105.47 |
| 73.7 | 20  | 14 | 378 | 112 | 73.7 | 112 | 111.44 |
| 73.7 | 20  | 12 | 378 | 94  | 73.7 | 94  | 93.532 |
| 73.7 | 22  | 14 | 376 | 110 | 73.7 | 110 | 109.45 |
| 73.7 | 10  | 20 | 372 | 80  | 73.7 | 80  | 79.602 |
| 73.7 | 26  | 14 | 374 | 116 | 73.7 | 116 | 115.42 |
| 73.8 | 26  | 14 | 372 | 116 | 73.8 | 116 | 115.42 |
| 73.8 | 20  | 24 | 396 | 114 | 73.8 | 114 | 113.43 |
| 73.8 | 22  | 14 | 368 | 90  | 73.8 | 90  | 89.552 |
| 73.8 | 22  | 14 | 348 | 106 | 73.8 | 106 | 105.47 |
| 73.8 | 28  | 10 | 378 | 106 | 73.8 | 106 | 105.47 |

|      |    |    |     |     |      |     |        |
|------|----|----|-----|-----|------|-----|--------|
| 73.9 | 12 | 20 | 396 | 122 | 73.9 | 122 | 121.39 |
| 73.9 | 12 | 16 | 362 | 94  | 73.9 | 94  | 93.532 |
| 73.9 | 14 | 10 | 378 | 98  | 73.9 | 98  | 97.512 |
| 73.9 | 16 | 18 | 408 | 96  | 73.9 | 96  | 95.522 |
| 73.9 | 22 | 16 | 376 | 124 | 73.9 | 124 | 123.38 |
| 74   | 26 | 8  | 388 | 100 | 74   | 100 | 99.502 |
| 74   | 26 | 16 | 376 | 130 | 74   | 130 | 129.35 |
| 74   | 28 | 12 | 392 | 98  | 74   | 98  | 97.512 |
| 74   | 24 | 14 | 416 | 110 | 74   | 110 | 109.45 |
| 74   | 16 | 8  | 368 | 96  | 74   | 96  | 95.522 |
| 74.1 | 20 | 12 | 368 | 124 | 74.1 | 124 | 123.38 |
| 74.1 | 24 | 8  | 386 | 104 | 74.1 | 104 | 103.48 |
| 74.1 | 22 | 12 | 418 | 106 | 74.1 | 106 | 105.47 |
| 74.1 | 20 | 14 | 388 | 114 | 74.1 | 114 | 113.43 |
| 74.1 | 26 | 6  | 384 | 102 | 74.1 | 102 | 101.49 |
| 74.2 | 18 | 10 | 396 | 120 | 74.2 | 120 | 119.4  |
| 74.2 | 18 | 10 | 408 | 88  | 74.2 | 88  | 87.562 |
| 74.2 | 20 | 14 | 380 | 104 | 74.2 | 104 | 103.48 |
| 74.2 | 20 | 12 | 374 | 122 | 74.2 | 122 | 121.39 |
| 74.2 | 20 | 8  | 374 | 106 | 74.2 | 106 | 105.47 |
| 74.3 | 16 | 10 | 386 | 112 | 74.3 | 112 | 111.44 |
| 74.3 | 22 | 4  | 364 | 110 | 74.3 | 110 | 109.45 |
| 74.3 | 28 | 14 | 390 | 96  | 74.3 | 96  | 95.522 |
| 74.3 | 16 | 8  | 354 | 92  | 74.3 | 92  | 91.542 |
| 74.3 | 26 | 10 | 400 | 92  | 74.3 | 92  | 91.542 |
| 74.4 | 22 | 6  | 404 | 124 | 74.4 | 124 | 123.38 |
| 74.4 | 30 | 10 | 408 | 104 | 74.4 | 104 | 103.48 |
| 74.4 | 28 | 8  | 370 | 138 | 74.4 | 138 | 137.31 |
| 74.4 | 16 | 10 | 394 | 132 | 74.4 | 132 | 131.34 |
| 74.4 | 22 | 10 | 358 | 122 | 74.4 | 122 | 121.39 |
| 74.5 | 22 | 12 | 384 | 94  | 74.5 | 94  | 93.532 |
| 74.5 | 24 | 12 | 406 | 118 | 74.5 | 118 | 117.41 |
| 74.5 | 20 | 10 | 376 | 98  | 74.5 | 98  | 97.512 |
| 74.5 | 26 | 12 | 390 | 130 | 74.5 | 130 | 129.35 |
| 74.5 | 20 | 8  | 378 | 116 | 74.5 | 116 | 115.42 |
| 74.6 | 22 | 12 | 384 | 110 | 74.6 | 110 | 109.45 |
| 74.6 | 10 | 8  | 386 | 112 | 74.6 | 112 | 111.44 |
| 74.6 | 14 | 14 | 430 | 122 | 74.6 | 122 | 121.39 |
| 74.6 | 14 | 12 | 424 | 112 | 74.6 | 112 | 111.44 |
| 74.6 | 10 | 10 | 410 | 116 | 74.6 | 116 | 115.42 |
| 74.7 | 20 | 4  | 384 | 98  | 74.7 | 98  | 97.512 |
| 74.7 | 28 | 12 | 448 | 116 | 74.7 | 116 | 115.42 |
| 74.7 | 18 | 6  | 398 | 124 | 74.7 | 124 | 123.38 |
| 74.7 | 26 | 8  | 378 | 108 | 74.7 | 108 | 107.46 |
| 74.7 | 16 | 6  | 444 | 116 | 74.7 | 116 | 115.42 |
| 74.8 | 16 | 14 | 398 | 106 | 74.8 | 106 | 105.47 |
| 74.8 | 24 | 8  | 442 | 142 | 74.8 | 142 | 141.29 |

|      |    |    |     |     |      |     |        |
|------|----|----|-----|-----|------|-----|--------|
| 74.8 | 20 | 4  | 426 | 128 | 74.8 | 128 | 127.36 |
| 74.8 | 20 | 14 | 464 | 120 | 74.8 | 120 | 119.4  |
| 74.8 | 14 | 8  | 482 | 116 | 74.8 | 116 | 115.42 |
| 74.9 | 22 | 8  | 454 | 126 | 74.9 | 126 | 125.37 |
| 74.9 | 22 | 12 | 538 | 138 | 74.9 | 138 | 137.31 |
| 74.9 | 12 | 10 | 504 | 138 | 74.9 | 138 | 137.31 |
| 74.9 | 18 | 10 | 532 | 120 | 74.9 | 120 | 119.4  |
| 74.9 | 20 | 18 | 538 | 106 | 74.9 | 106 | 105.47 |
| 75   | 16 | 8  | 616 | 134 | 75   | 134 | 133.33 |
| 75   | 22 | 8  | 614 | 148 | 75   | 148 | 147.26 |
| 75   | 20 | 10 | 632 | 108 | 75   | 108 | 107.46 |
| 75   | 20 | 8  | 680 | 120 | 75   | 120 | 119.4  |
| 75   | 24 | 4  | 682 | 128 | 75   | 128 | 127.36 |
| 75.1 | 14 | 12 | 682 | 130 | 75.1 | 130 | 129.35 |
| 75.1 | 16 | 8  | 696 | 120 | 75.1 | 120 | 119.4  |
| 75.1 | 20 | 14 | 680 | 126 | 75.1 | 126 | 125.37 |
| 75.1 | 18 | 8  | 718 | 150 | 75.1 | 150 | 149.25 |
| 75.1 | 14 | 6  | 714 | 128 | 75.1 | 128 | 127.36 |
| 75.2 | 14 | 14 | 712 | 136 | 75.2 | 136 | 135.32 |
| 75.2 | 22 | 8  | 678 | 166 | 75.2 | 166 | 165.17 |
| 75.2 | 24 | 8  | 726 | 128 | 75.2 | 128 | 127.36 |
| 75.2 | 18 | 4  | 728 | 152 | 75.2 | 152 | 151.24 |
| 75.2 | 22 | 12 | 710 | 142 | 75.2 | 142 | 141.29 |
| 75.3 | 16 | 10 | 704 | 120 | 75.3 | 120 | 119.4  |
| 75.3 | 14 | 10 | 738 | 128 | 75.3 | 128 | 127.36 |
| 75.3 | 18 | 14 | 710 | 122 | 75.3 | 122 | 121.39 |
| 75.3 | 12 | 8  | 718 | 152 | 75.3 | 152 | 151.24 |
| 75.3 | 12 | 10 | 718 | 144 | 75.3 | 144 | 143.28 |
| 75.4 | 14 | 8  | 668 | 110 | 75.4 | 110 | 109.45 |
| 75.4 | 18 | 8  | 674 | 120 | 75.4 | 120 | 119.4  |
| 75.4 | 26 | 6  | 666 | 138 | 75.4 | 138 | 137.31 |
| 75.4 | 22 | 14 | 672 | 114 | 75.4 | 114 | 113.43 |
| 75.4 | 28 | 10 | 644 | 142 | 75.4 | 142 | 141.29 |
| 75.5 | 16 | 8  | 580 | 138 | 75.5 | 138 | 137.31 |
| 75.5 | 16 | 6  | 602 | 140 | 75.5 | 140 | 139.3  |
| 75.5 | 20 | 12 | 538 | 124 | 75.5 | 124 | 123.38 |
| 75.5 | 26 | 12 | 548 | 104 | 75.5 | 104 | 103.48 |
| 75.5 | 16 | 6  | 490 | 102 | 75.5 | 102 | 101.49 |
| 75.6 | 24 | 6  | 526 | 138 | 75.6 | 138 | 137.31 |
| 75.6 | 20 | 8  | 526 | 100 | 75.6 | 100 | 99.502 |
| 75.6 | 16 | 4  | 544 | 124 | 75.6 | 124 | 123.38 |
| 75.6 | 24 | 6  | 512 | 116 | 75.6 | 116 | 115.42 |
| 75.6 | 14 | 10 | 478 | 118 | 75.6 | 118 | 117.41 |
| 75.7 | 24 | 8  | 440 | 110 | 75.7 | 110 | 109.45 |
| 75.7 | 12 | 8  | 466 | 130 | 75.7 | 130 | 129.35 |
| 75.7 | 16 | 14 | 424 | 102 | 75.7 | 102 | 101.49 |
| 75.7 | 20 | 12 | 442 | 120 | 75.7 | 120 | 119.4  |

|      |    |    |     |     |      |     |        |
|------|----|----|-----|-----|------|-----|--------|
| 75.7 | 12 | 8  | 410 | 104 | 75.7 | 104 | 103.48 |
| 75.8 | 24 | 6  | 422 | 110 | 75.8 | 110 | 109.45 |
| 75.8 | 18 | 8  | 414 | 112 | 75.8 | 112 | 111.44 |
| 75.8 | 20 | 14 | 414 | 142 | 75.8 | 142 | 141.29 |
| 75.8 | 20 | 12 | 408 | 134 | 75.8 | 134 | 133.33 |
| 75.8 | 14 | 6  | 402 | 102 | 75.8 | 102 | 101.49 |
| 75.9 | 24 | 6  | 386 | 136 | 75.9 | 136 | 135.32 |
| 75.9 | 18 | 10 | 394 | 130 | 75.9 | 130 | 129.35 |
| 75.9 | 26 | 10 | 412 | 110 | 75.9 | 110 | 109.45 |
| 75.9 | 20 | 12 | 330 | 104 | 75.9 | 104 | 103.48 |
| 75.9 | 24 | 8  | 380 | 98  | 75.9 | 98  | 97.512 |
| 76   | 20 | 6  | 386 | 128 | 76   | 128 | 127.36 |
| 76   | 20 | 6  | 384 | 94  | 76   | 94  | 93.532 |
| 76   | 14 | 8  | 356 | 100 | 76   | 100 | 99.502 |
| 76   | 22 | 6  | 378 | 120 | 76   | 120 | 119.4  |
| 76   | 24 | 8  | 364 | 108 | 76   | 108 | 107.46 |
| 76.1 | 28 | 8  | 390 | 114 | 76.1 | 114 | 113.43 |
| 76.1 | 20 | 16 | 390 | 100 | 76.1 | 100 | 99.502 |
| 76.1 | 22 | 10 | 378 | 96  | 76.1 | 96  | 95.522 |
| 76.1 | 22 | 10 | 376 | 106 | 76.1 | 106 | 105.47 |
| 76.1 | 20 | 6  | 374 | 104 | 76.1 | 104 | 103.48 |
| 76.2 | 24 | 4  | 368 | 92  | 76.2 | 92  | 91.542 |
| 76.2 | 26 | 12 | 414 | 104 | 76.2 | 104 | 103.48 |
| 76.2 | 14 | 4  | 366 | 108 | 76.2 | 108 | 107.46 |
| 76.2 | 12 | 12 | 400 | 94  | 76.2 | 94  | 93.532 |
| 76.2 | 16 | 10 | 384 | 108 | 76.2 | 108 | 107.46 |
| 76.3 | 18 | 10 | 390 | 102 | 76.3 | 102 | 101.49 |
| 76.3 | 20 | 14 | 390 | 106 | 76.3 | 106 | 105.47 |
| 76.3 | 24 | 10 | 388 | 104 | 76.3 | 104 | 103.48 |
| 76.3 | 20 | 10 | 384 | 98  | 76.3 | 98  | 97.512 |
| 76.3 | 18 | 8  | 392 | 102 | 76.3 | 102 | 101.49 |
| 76.4 | 24 | 12 | 362 | 104 | 76.4 | 104 | 103.48 |
| 76.4 | 18 | 4  | 392 | 116 | 76.4 | 116 | 115.42 |
| 76.4 | 24 | 12 | 374 | 98  | 76.4 | 98  | 97.512 |
| 76.4 | 20 | 10 | 410 | 106 | 76.4 | 106 | 105.47 |
| 76.4 | 24 | 6  | 368 | 108 | 76.4 | 108 | 107.46 |
| 76.5 | 32 | 10 | 386 | 108 | 76.5 | 108 | 107.46 |
| 76.5 | 28 | 10 | 390 | 112 | 76.5 | 112 | 111.44 |
| 76.5 | 24 | 12 | 336 | 92  | 76.5 | 92  | 91.542 |
| 76.5 | 28 | 8  | 386 | 98  | 76.5 | 98  | 97.512 |
| 76.5 | 20 | 20 | 386 | 108 | 76.5 | 108 | 107.46 |
| 76.6 | 30 | 16 | 372 | 102 | 76.6 | 102 | 101.49 |
| 76.6 | 46 | 16 | 390 | 124 | 76.6 | 124 | 123.38 |
| 76.6 | 36 | 12 | 404 | 108 | 76.6 | 108 | 107.46 |
| 76.6 | 40 | 10 | 352 | 100 | 76.6 | 100 | 99.502 |
| 76.6 | 40 | 10 | 362 | 112 | 76.6 | 112 | 111.44 |
| 76.7 | 34 | 12 | 400 | 102 | 76.7 | 102 | 101.49 |

|      |     |    |     |     |      |     |        |
|------|-----|----|-----|-----|------|-----|--------|
| 76.7 | 38  | 12 | 338 | 114 | 76.7 | 114 | 113.43 |
| 76.7 | 42  | 16 | 396 | 100 | 76.7 | 100 | 99.502 |
| 76.7 | 36  | 14 | 416 | 96  | 76.7 | 96  | 95.522 |
| 76.7 | 50  | 10 | 388 | 142 | 76.7 | 142 | 141.29 |
| 76.8 | 60  | 16 | 378 | 106 | 76.8 | 106 | 105.47 |
| 76.8 | 42  | 14 | 360 | 110 | 76.8 | 110 | 109.45 |
| 76.8 | 52  | 6  | 364 | 128 | 76.8 | 128 | 127.36 |
| 76.8 | 76  | 12 | 422 | 116 | 76.8 | 116 | 115.42 |
| 76.8 | 68  | 14 | 412 | 120 | 76.8 | 120 | 119.4  |
| 76.9 | 88  | 26 | 344 | 132 | 76.9 | 132 | 131.34 |
| 76.9 | 106 | 26 | 398 | 148 | 76.9 | 148 | 147.26 |
| 76.9 | 96  | 14 | 378 | 134 | 76.9 | 134 | 133.33 |
| 76.9 | 118 | 18 | 358 | 126 | 76.9 | 126 | 125.37 |
| 76.9 | 134 | 16 | 378 | 174 | 76.9 | 174 | 173.13 |
| 77   | 170 | 22 | 370 | 146 | 77   | 146 | 145.27 |
| 77   | 176 | 22 | 404 | 196 | 77   | 196 | 195.02 |
| 77   | 198 | 26 | 382 | 166 | 77   | 166 | 165.17 |
| 77   | 208 | 10 | 362 | 174 | 77   | 174 | 173.13 |
| 77   | 252 | 22 | 364 | 148 | 77   | 148 | 147.26 |
| 77.1 | 226 | 24 | 402 | 160 | 77.1 | 160 | 159.2  |
| 77.1 | 266 | 24 | 408 | 152 | 77.1 | 152 | 151.24 |
| 77.1 | 260 | 22 | 382 | 154 | 77.1 | 154 | 153.23 |
| 77.1 | 246 | 24 | 378 | 152 | 77.1 | 152 | 151.24 |
| 77.1 | 198 | 18 | 384 | 154 | 77.1 | 154 | 153.23 |
| 77.2 | 204 | 22 | 406 | 160 | 77.2 | 160 | 159.2  |
| 77.2 | 206 | 28 | 364 | 150 | 77.2 | 150 | 149.25 |
| 77.2 | 194 | 30 | 362 | 142 | 77.2 | 142 | 141.29 |
| 77.2 | 176 | 22 | 342 | 164 | 77.2 | 164 | 163.18 |
| 77.2 | 160 | 28 | 358 | 154 | 77.2 | 154 | 153.23 |
| 77.3 | 186 | 22 | 362 | 140 | 77.3 | 140 | 139.3  |
| 77.3 | 158 | 24 | 374 | 134 | 77.3 | 134 | 133.33 |
| 77.3 | 168 | 22 | 364 | 138 | 77.3 | 138 | 137.31 |
| 77.3 | 138 | 30 | 376 | 146 | 77.3 | 146 | 145.27 |
| 77.3 | 172 | 14 | 362 | 124 | 77.3 | 124 | 123.38 |
| 77.4 | 134 | 24 | 370 | 114 | 77.4 | 114 | 113.43 |
| 77.4 | 120 | 18 | 396 | 124 | 77.4 | 124 | 123.38 |
| 77.4 | 98  | 22 | 326 | 136 | 77.4 | 136 | 135.32 |
| 77.4 | 106 | 16 | 392 | 130 | 77.4 | 130 | 129.35 |
| 77.4 | 94  | 16 | 374 | 132 | 77.4 | 132 | 131.34 |
| 77.5 | 72  | 8  | 388 | 96  | 77.5 | 96  | 95.522 |
| 77.5 | 68  | 12 | 372 | 100 | 77.5 | 100 | 99.502 |
| 77.5 | 56  | 14 | 382 | 112 | 77.5 | 112 | 111.44 |
| 77.5 | 54  | 12 | 350 | 126 | 77.5 | 126 | 125.37 |
| 77.5 | 42  | 8  | 350 | 100 | 77.5 | 100 | 99.502 |
| 77.6 | 48  | 16 | 406 | 104 | 77.6 | 104 | 103.48 |
| 77.6 | 44  | 18 | 352 | 118 | 77.6 | 118 | 117.41 |
| 77.6 | 44  | 10 | 382 | 92  | 77.6 | 92  | 91.542 |

|      |    |    |     |     |      |     |        |
|------|----|----|-----|-----|------|-----|--------|
| 77.6 | 38 | 8  | 380 | 94  | 77.6 | 94  | 93.532 |
| 77.6 | 32 | 18 | 366 | 122 | 77.6 | 122 | 121.39 |
| 77.7 | 34 | 12 | 352 | 102 | 77.7 | 102 | 101.49 |
| 77.7 | 38 | 14 | 366 | 100 | 77.7 | 100 | 99.502 |
| 77.7 | 32 | 12 | 400 | 88  | 77.7 | 88  | 87.562 |
| 77.7 | 26 | 8  | 344 | 104 | 77.7 | 104 | 103.48 |
| 77.7 | 28 | 14 | 384 | 104 | 77.7 | 104 | 103.48 |
| 77.8 | 24 | 22 | 380 | 102 | 77.8 | 102 | 101.49 |
| 77.8 | 28 | 16 | 358 | 92  | 77.8 | 92  | 91.542 |
| 77.8 | 24 | 14 | 380 | 88  | 77.8 | 88  | 87.562 |
| 77.8 | 24 | 12 | 366 | 98  | 77.8 | 98  | 97.512 |
| 77.8 | 24 | 24 | 338 | 104 | 77.8 | 104 | 103.48 |
| 77.9 | 14 | 16 | 376 | 78  | 77.9 | 78  | 77.612 |
| 77.9 | 18 | 14 | 370 | 90  | 77.9 | 90  | 89.552 |
| 77.9 | 32 | 16 | 388 | 82  | 77.9 | 82  | 81.592 |
| 77.9 | 26 | 18 | 352 | 108 | 77.9 | 108 | 107.46 |
| 77.9 | 30 | 16 | 384 | 104 | 77.9 | 104 | 103.48 |
| 78   | 22 | 14 | 376 | 96  | 78   | 96  | 95.522 |
| 78   | 26 | 16 | 374 | 82  | 78   | 82  | 81.592 |
| 78   | 12 | 18 | 410 | 84  | 78   | 84  | 83.582 |
| 78   | 14 | 16 | 376 | 100 | 78   | 100 | 99.502 |
| 78   | 26 | 10 | 368 | 110 | 78   | 110 | 109.45 |
| 78.1 | 26 | 22 | 370 | 94  | 78.1 | 94  | 93.532 |
| 78.1 | 36 | 14 | 368 | 78  | 78.1 | 78  | 77.612 |
| 78.1 | 14 | 6  | 382 | 100 | 78.1 | 100 | 99.502 |
| 78.1 | 22 | 22 | 386 | 100 | 78.1 | 100 | 99.502 |
| 78.1 | 24 | 12 | 380 | 90  | 78.1 | 90  | 89.552 |
| 78.2 | 24 | 14 | 412 | 80  | 78.2 | 80  | 79.602 |
| 78.2 | 18 | 24 | 362 | 82  | 78.2 | 82  | 81.592 |
| 78.2 | 22 | 20 | 376 | 80  | 78.2 | 80  | 79.602 |
| 78.2 | 22 | 16 | 400 | 92  | 78.2 | 92  | 91.542 |
| 78.2 | 24 | 20 | 384 | 82  | 78.2 | 82  | 81.592 |
| 78.3 | 22 | 18 | 370 | 102 | 78.3 | 102 | 101.49 |
| 78.3 | 16 | 32 | 350 | 90  | 78.3 | 90  | 89.552 |
| 78.3 | 14 | 24 | 384 | 92  | 78.3 | 92  | 91.542 |
| 78.3 | 14 | 20 | 360 | 102 | 78.3 | 102 | 101.49 |
| 78.3 | 24 | 30 | 368 | 90  | 78.3 | 90  | 89.552 |
| 78.4 | 18 | 24 | 360 | 92  | 78.4 | 92  | 91.542 |
| 78.4 | 20 | 32 | 392 | 102 | 78.4 | 102 | 101.49 |
| 78.4 | 20 | 22 | 382 | 90  | 78.4 | 90  | 89.552 |
| 78.4 | 24 | 36 | 382 | 96  | 78.4 | 96  | 95.522 |
| 78.4 | 6  | 26 | 390 | 102 | 78.4 | 102 | 101.49 |
| 78.5 | 18 | 24 | 394 | 82  | 78.5 | 82  | 81.592 |
| 78.5 | 24 | 26 | 368 | 110 | 78.5 | 110 | 109.45 |
| 78.5 | 26 | 30 | 410 | 94  | 78.5 | 94  | 93.532 |
| 78.5 | 20 | 42 | 376 | 86  | 78.5 | 86  | 85.572 |
| 78.5 | 26 | 26 | 362 | 90  | 78.5 | 90  | 89.552 |

|      |    |    |     |     |      |     |        |
|------|----|----|-----|-----|------|-----|--------|
| 78.6 | 28 | 24 | 398 | 98  | 78.6 | 98  | 97.512 |
| 78.6 | 14 | 26 | 390 | 96  | 78.6 | 96  | 95.522 |
| 78.6 | 16 | 28 | 378 | 90  | 78.6 | 90  | 89.552 |
| 78.6 | 14 | 28 | 332 | 94  | 78.6 | 94  | 93.532 |
| 78.6 | 28 | 30 | 340 | 92  | 78.6 | 92  | 91.542 |
| 78.7 | 16 | 22 | 370 | 90  | 78.7 | 90  | 89.552 |
| 78.7 | 18 | 18 | 386 | 82  | 78.7 | 82  | 81.592 |
| 78.7 | 14 | 22 | 382 | 78  | 78.7 | 78  | 77.612 |
| 78.7 | 18 | 18 | 388 | 102 | 78.7 | 102 | 101.49 |
| 78.7 | 14 | 18 | 374 | 94  | 78.7 | 94  | 93.532 |
| 78.8 | 14 | 10 | 378 | 90  | 78.8 | 90  | 89.552 |
| 78.8 | 14 | 18 | 362 | 112 | 78.8 | 112 | 111.44 |
| 78.8 | 16 | 16 | 390 | 108 | 78.8 | 108 | 107.46 |
| 78.8 | 20 | 18 | 396 | 90  | 78.8 | 90  | 89.552 |
| 78.8 | 14 | 12 | 398 | 70  | 78.8 | 70  | 69.652 |
| 78.9 | 14 | 14 | 400 | 94  | 78.9 | 94  | 93.532 |
| 78.9 | 18 | 18 | 350 | 84  | 78.9 | 84  | 83.582 |
| 78.9 | 28 | 12 | 386 | 106 | 78.9 | 106 | 105.47 |
| 78.9 | 10 | 14 | 338 | 86  | 78.9 | 86  | 85.572 |
| 78.9 | 18 | 18 | 396 | 90  | 78.9 | 90  | 89.552 |
| 79   | 24 | 20 | 402 | 104 | 79   | 104 | 103.48 |
| 79   | 20 | 10 | 406 | 114 | 79   | 114 | 113.43 |
| 79   | 24 | 10 | 352 | 82  | 79   | 82  | 81.592 |
| 79   | 18 | 10 | 398 | 102 | 79   | 102 | 101.49 |
| 79   | 10 | 14 | 370 | 90  | 79   | 90  | 89.552 |
| 79.1 | 14 | 6  | 340 | 102 | 79.1 | 102 | 101.49 |
| 79.1 | 20 | 10 | 356 | 82  | 79.1 | 82  | 81.592 |
| 79.1 | 22 | 18 | 396 | 108 | 79.1 | 108 | 107.46 |
| 79.1 | 14 | 10 | 370 | 104 | 79.1 | 104 | 103.48 |
| 79.1 | 14 | 10 | 364 | 84  | 79.1 | 84  | 83.582 |
| 79.2 | 18 | 14 | 394 | 102 | 79.2 | 102 | 101.49 |
| 79.2 | 22 | 14 | 374 | 94  | 79.2 | 94  | 93.532 |
| 79.2 | 20 | 6  | 364 | 90  | 79.2 | 90  | 89.552 |
| 79.2 | 18 | 10 | 418 | 104 | 79.2 | 104 | 103.48 |
| 79.2 | 20 | 8  | 382 | 106 | 79.2 | 106 | 105.47 |
| 79.3 | 12 | 12 | 378 | 90  | 79.3 | 90  | 89.552 |
| 79.3 | 16 | 16 | 394 | 98  | 79.3 | 98  | 97.512 |
| 79.3 | 14 | 14 | 386 | 76  | 79.3 | 76  | 75.622 |
| 79.3 | 16 | 4  | 370 | 84  | 79.3 | 84  | 83.582 |
| 79.3 | 26 | 16 | 392 | 118 | 79.3 | 118 | 117.41 |
| 79.4 | 18 | 6  | 388 | 96  | 79.4 | 96  | 95.522 |
| 79.4 | 20 | 8  | 368 | 86  | 79.4 | 86  | 85.572 |
| 79.4 | 22 | 6  | 394 | 86  | 79.4 | 86  | 85.572 |
| 79.4 | 20 | 16 | 408 | 118 | 79.4 | 118 | 117.41 |
| 79.4 | 16 | 12 | 378 | 104 | 79.4 | 104 | 103.48 |
| 79.5 | 18 | 14 | 408 | 110 | 79.5 | 110 | 109.45 |
| 79.5 | 20 | 8  | 374 | 110 | 79.5 | 110 | 109.45 |

|      |    |    |     |     |      |     |        |
|------|----|----|-----|-----|------|-----|--------|
| 79.5 | 14 | 6  | 396 | 96  | 79.5 | 96  | 95.522 |
| 79.5 | 18 | 6  | 396 | 102 | 79.5 | 102 | 101.49 |
| 79.5 | 20 | 14 | 392 | 118 | 79.5 | 118 | 117.41 |
| 79.6 | 20 | 6  | 402 | 92  | 79.6 | 92  | 91.542 |
| 79.6 | 20 | 8  | 372 | 96  | 79.6 | 96  | 95.522 |
| 79.6 | 20 | 12 | 352 | 102 | 79.6 | 102 | 101.49 |
| 79.6 | 10 | 10 | 386 | 90  | 79.6 | 90  | 89.552 |
| 79.6 | 28 | 8  | 384 | 86  | 79.6 | 86  | 85.572 |
| 79.7 | 18 | 16 | 368 | 104 | 79.7 | 104 | 103.48 |
| 79.7 | 18 | 8  | 392 | 100 | 79.7 | 100 | 99.502 |
| 79.7 | 22 | 8  | 376 | 100 | 79.7 | 100 | 99.502 |
| 79.7 | 18 | 12 | 410 | 90  | 79.7 | 90  | 89.552 |
| 79.7 | 20 | 10 | 356 | 86  | 79.7 | 86  | 85.572 |
| 79.8 | 20 | 12 | 358 | 116 | 79.8 | 116 | 115.42 |
| 79.8 | 22 | 10 | 390 | 90  | 79.8 | 90  | 89.552 |
| 79.8 | 20 | 14 | 394 | 98  | 79.8 | 98  | 97.512 |
| 79.8 | 24 | 10 | 394 | 86  | 79.8 | 86  | 85.572 |
| 79.8 | 14 | 16 | 398 | 106 | 79.8 | 106 | 105.47 |
| 79.9 | 20 | 22 | 396 | 92  | 79.9 | 92  | 91.542 |
| 79.9 | 16 | 16 | 350 | 110 | 79.9 | 110 | 109.45 |
| 79.9 | 16 | 4  | 436 | 96  | 79.9 | 96  | 95.522 |
| 79.9 | 10 | 12 | 380 | 86  | 79.9 | 86  | 85.572 |
| 79.9 | 12 | 16 | 400 | 88  | 79.9 | 88  | 87.562 |
| 80   | 16 | 10 | 418 | 90  | 80   | 90  | 89.552 |
| 80   | 16 | 8  | 398 | 106 | 80   | 106 | 105.47 |
| 80   | 16 | 12 | 76  | 80  | 80   | 80  | 79.602 |
